# Supplementary material for: Pleiotropic requirements for human TDP-43 in the regulation of cell and organelle homeostasis
Source: Life Sci Alliance. 2019 Sep 16;2(5):e201900358. doi: 10.26508/lsa.201900358 (PMC6749094; doi:10.26508/lsa.201900358)
Supplement: Supplementary file 1 [file LSA-2019-00358_TableS1.xlsx]

## Sheet: gene_exp_changes.xls
test_id	gene_id	gene	locus	sample_1	sample_2	status	KO FPKM	Rescue FPKM	log2(fold_change)	test_stat	p_value	q_value	significant	abs_test_stat
XLOC_013957	XLOC_013957	LOC284454,MIR24-2	chr19:13945329-13947173	KO	Rescue	OK	330.425	6.58289	-5.64946	-38.7287	5e-05	0.000584007	yes	38.7287
XLOC_002876	XLOC_002876	PFKP	chr10:3109711-3178997	KO	Rescue	OK	5.67435	105.22	4.21281	23.237	5e-05	0.000584007	yes	23.237
XLOC_000116	XLOC_000116	TARDBP	chr1:11072605-11085638	KO	Rescue	OK	8.48924	74.868	3.14064	19.2633	5e-05	0.000584007	yes	19.2633
XLOC_026346	XLOC_026346	PI15	chr8:75736722-75767264	KO	Rescue	OK	0.12187	6.88568	5.82019	19.1238	5e-05	0.000584007	yes	19.1238
XLOC_021993	XLOC_021993	SPARC	chr5:151040656-151066615	KO	Rescue	OK	22.2542	2.46556	-3.17409	-17.862	5e-05	0.000584007	yes	17.862
XLOC_012980	XLOC_012980	PKN1	chr19:14544136-14582679	KO	Rescue	OK	4.96633	33.2217	2.74187	16.3248	5e-05	0.000584007	yes	16.3248
XLOC_002642	XLOC_002642	FMOD	chr1:203309726-203320289	KO	Rescue	OK	8.14285	0.384676	-4.40382	-15.863	5e-05	0.000584007	yes	15.863
XLOC_027566	XLOC_027566	NUP188	chr9:131707806-131769676	KO	Rescue	OK	12.1124	74.4441	2.61968	15.6211	5e-05	0.000584007	yes	15.6211
XLOC_004861	XLOC_004861	CHID1	chr11:867443-915058	KO	Rescue	OK	1.66256	22.3228	3.74704	14.6792	5e-05	0.000584007	yes	14.6792
XLOC_028104	XLOC_028104	C9orf152	chr9:112961845-112970413	KO	Rescue	OK	6.84475	0.52432	-3.70648	-14.1035	5e-05	0.000584007	yes	14.1035
XLOC_013835	XLOC_013835	INSR	chr19:7112265-7294457	KO	Rescue	OK	1.10699	6.15285	2.47462	13.9903	5e-05	0.000584007	yes	13.9903
XLOC_025524	XLOC_025524	HOXA10,HOXA10-HOXA9,HOXA9,MIR196B	chr7:27202056-27219880	KO	Rescue	OK	8.83706	35.9196	2.02313	13.8624	5e-05	0.000584007	yes	13.8624
XLOC_020842	XLOC_020842	ACSL1	chr4:185676748-185747239	KO	Rescue	OK	6.26151	0.812312	-2.9464	-13.5062	5e-05	0.000584007	yes	13.5062
XLOC_013859	XLOC_013859	MUC16	chr19:8959519-9092018	KO	Rescue	OK	0.0119194	0.378155	4.98759	13.4923	5e-05	0.000584007	yes	13.4923
XLOC_026035	XLOC_026035	TMEM176B	chr7:150488375-150522649	KO	Rescue	OK	24.6094	1.9337	-3.66977	-13.2526	5e-05	0.000584007	yes	13.2526
XLOC_014657	XLOC_014657	-	chr2:20291269-20296072	KO	Rescue	OK	3.12589	0.35362	-3.14399	-12.6146	5e-05	0.000584007	yes	12.6146
XLOC_018956	XLOC_018956	USP13	chr3:179370476-179754841	KO	Rescue	OK	2.99604	15.3384	2.35601	12.4871	5e-05	0.000584007	yes	12.4871
XLOC_025313	XLOC_025313	TMEM178B	chr7:140774031-141180179	KO	Rescue	OK	1.56345	0.215067	-2.86188	-12.4428	5e-05	0.000584007	yes	12.4428
XLOC_022374	XLOC_022374	CFB	chr6:31913720-31919861	KO	Rescue	OK	6.41807	0.870634	-2.882	-12.3373	5e-05	0.000584007	yes	12.3373
XLOC_000188	XLOC_000188	ACTL8	chr1:18081807-18153563	KO	Rescue	OK	1.07238	8.31252	2.95447	12.0521	5e-05	0.000584007	yes	12.0521
XLOC_028415	XLOC_028415	REPS2	chrX:16964813-17171403	KO	Rescue	OK	2.40231	0.397905	-2.59393	-11.9773	5e-05	0.000584007	yes	11.9773
XLOC_013828	XLOC_013828	C3	chr19:6677845-6720662	KO	Rescue	OK	6.41348	1.52163	-2.07549	-11.3153	5e-05	0.000584007	yes	11.3153
XLOC_025748	XLOC_025748	ABCB1	chr7:87132342-87461613	KO	Rescue	OK	9.59631	2.45237	-1.96831	-11.2271	5e-05	0.000584007	yes	11.2271
XLOC_003071	XLOC_003071	BICC1	chr10:60272594-60591176	KO	Rescue	OK	1.06872	5.03506	2.23613	10.8445	5e-05	0.000584007	yes	10.8445
XLOC_005529	XLOC_005529	CRYAB	chr11:111779349-111797595	KO	Rescue	OK	34.5878	7.09078	-2.28625	-10.8438	5e-05	0.000584007	yes	10.8438
XLOC_017653	XLOC_017653	RANBP1	chr22:20105023-20114704	KO	Rescue	OK	128.065	411.788	1.68502	10.8355	5e-05	0.000584007	yes	10.8355
XLOC_024830	XLOC_024830	GPNMB	chr7:23286288-23314729	KO	Rescue	OK	9.4721	1.70229	-2.4762	-10.7872	5e-05	0.000584007	yes	10.7872
XLOC_011671	XLOC_011671	VTN	chr17:26694298-26697373	KO	Rescue	OK	37.1382	10.7162	-1.79311	-10.6574	5e-05	0.000584007	yes	10.6574
XLOC_025388	XLOC_025388	ABP1	chr7:150549564-150558379	KO	Rescue	OK	11.9377	3.06898	-1.95969	-10.4962	5e-05	0.000584007	yes	10.4962
XLOC_017110	XLOC_017110	-	chr20:49961265-49983188	KO	Rescue	OK	2.01289	0.31946	-2.65556	-10.2955	5e-05	0.000584007	yes	10.2955
XLOC_017955	XLOC_017955	KLHDC7B	chr22:50983837-50989452	KO	Rescue	OK	2.96928	0.254348	-3.54524	-10.2251	5e-05	0.000584007	yes	10.2251
XLOC_009857	XLOC_009857	GNAO1	chr16:56225250-56391356	KO	Rescue	OK	1.47795	0.165875	-3.15543	-10.025	5e-05	0.000584007	yes	10.025
XLOC_007882	XLOC_007882	TMEM63C	chr14:77648101-77725838	KO	Rescue	OK	1.17339	0.090971	-3.68914	-9.76724	5e-05	0.000584007	yes	9.76724
XLOC_012469	XLOC_012469	SERPINB5	chr18:61144143-61172318	KO	Rescue	OK	4.11942	13.626	1.72585	9.75788	5e-05	0.000584007	yes	9.75788
XLOC_028436	XLOC_028436	SAT1	chrX:23801274-23804327	KO	Rescue	OK	25.8227	7.17671	-1.84725	-9.72477	5e-05	0.000584007	yes	9.72477
XLOC_014613	XLOC_014613	TRAPPC12	chr2:3383445-3483342	KO	Rescue	OK	1.89713	7.19986	1.92415	9.69407	5e-05	0.000584007	yes	9.69407
XLOC_022431	XLOC_022431	CDKN1A	chr6:36644236-36655116	KO	Rescue	OK	19.2955	6.0432	-1.67488	-9.55764	5e-05	0.000584007	yes	9.55764
XLOC_015582	XLOC_015582	WDR35	chr2:20110012-20189884	KO	Rescue	OK	1.03998	3.58988	1.78738	9.54775	5e-05	0.000584007	yes	9.54775
XLOC_025368	XLOC_025368	LOC155060,ZNF783	chr7:148959109-148994403	KO	Rescue	OK	1.78015	5.93518	1.73729	9.4508	5e-05	0.000584007	yes	9.4508
XLOC_013014	XLOC_013014	MYO9B	chr19:17186543-17324104	KO	Rescue	OK	2.83516	8.78606	1.63179	9.40573	5e-05	0.000584007	yes	9.40573
XLOC_013358	XLOC_013358	EHD2	chr19:48216600-48246391	KO	Rescue	OK	14.2398	39.6354	1.47686	9.39149	5e-05	0.000584007	yes	9.39149
XLOC_015521	XLOC_015521	ATG4B	chr2:242577026-242613271	KO	Rescue	OK	3.19806	10.0803	1.65627	9.3443	5e-05	0.000584007	yes	9.3443
XLOC_019840	XLOC_019840	S100P	chr4:6695565-6698897	KO	Rescue	OK	151.151	51.9229	-1.54154	-9.22318	5e-05	0.000584007	yes	9.22318
XLOC_016452	XLOC_016452	SIRPA	chr20:1874812-1920540	KO	Rescue	OK	1.62802	0.228058	-2.83564	-9.1797	5e-05	0.000584007	yes	9.1797
XLOC_029357	XLOC_029357	MBNL3	chrX:131503342-131624203	KO	Rescue	OK	3.03078	8.28725	1.4512	9.07243	5e-05	0.000584007	yes	9.07243
XLOC_011896	XLOC_011896	MEOX1	chr17:41717755-41739319	KO	Rescue	OK	12.1565	3.8213	-1.66959	-9.05213	5e-05	0.000584007	yes	9.05213
XLOC_003417	XLOC_003417	DOCK1	chr10:128588082-129250780	KO	Rescue	OK	3.934	13.2752	1.75467	8.75446	5e-05	0.000584007	yes	8.75446
XLOC_001027	XLOC_001027	LOC100505633	chr1:159930837-159948876	KO	Rescue	OK	5.31335	0.729017	-2.8656	-8.59545	5e-05	0.000584007	yes	8.59545
XLOC_009547	XLOC_009547	CACNA1H	chr16:1203127-1275254	KO	Rescue	OK	2.36903	0.565651	-2.06631	-8.49317	5e-05	0.000584007	yes	8.49317
XLOC_022756	XLOC_022756	TNFAIP3	chr6:138144806-138204451	KO	Rescue	OK	2.23212	0.577095	-1.95153	-8.47685	5e-05	0.000584007	yes	8.47685
XLOC_027495	XLOC_027495	GSN	chr9:124030140-124095120	KO	Rescue	OK	6.51957	2.03411	-1.68038	-8.47193	5e-05	0.000584007	yes	8.47193
XLOC_026139	XLOC_026139	SLC7A2	chr8:17354518-17428077	KO	Rescue	OK	3.15045	8.2084	1.38154	8.45581	5e-05	0.000584007	yes	8.45581
XLOC_011845	XLOC_011845	KRT17	chr17:39775688-39781015	KO	Rescue	OK	88.8418	32.6521	-1.44406	-8.35996	5e-05	0.000584007	yes	8.35996
XLOC_002590	XLOC_002590	FAM5C	chr1:190066796-190450482	KO	Rescue	OK	0.848688	3.62424	2.09437	8.28925	5e-05	0.000584007	yes	8.28925
XLOC_023426	XLOC_023426	MAN1A1	chr6:119498365-119670931	KO	Rescue	OK	0.0637018	0.850324	3.73861	8.24542	5e-05	0.000584007	yes	8.24542
XLOC_008503	XLOC_008503	AHNAK2	chr14:105403590-105444697	KO	Rescue	OK	5.0508	2.02212	-1.32064	-8.23015	5e-05	0.000584007	yes	8.23015
XLOC_009697	XLOC_009697	TMC5	chr16:19421222-19510434	KO	Rescue	OK	1.66555	4.70803	1.49913	8.1574	5e-05	0.000584007	yes	8.1574
XLOC_013402	XLOC_013402	SNAR-G1	chr19:49540276-49540404	KO	Rescue	OK	2.71641	0	#NAME?	#NAME?	0.00135	0.0104034	yes	8.14923
XLOC_007940	XLOC_007940	BDKRB2	chr14:96671134-96710672	KO	Rescue	OK	1.24836	0.214943	-2.53801	-8.13775	5e-05	0.000584007	yes	8.13775
XLOC_007507	XLOC_007507	KCTD12	chr13:77454303-77460540	KO	Rescue	OK	1.68883	0.479886	-1.81526	-8.13382	5e-05	0.000584007	yes	8.13382
XLOC_011351	XLOC_011351	MGAT5B	chr17:74864470-74946497	KO	Rescue	OK	4.73783	12.0473	1.34642	8.06627	5e-05	0.000584007	yes	8.06627
XLOC_003107	XLOC_003107	HK1	chr10:71029755-71161637	KO	Rescue	OK	2.8693	0.806115	-1.83164	-8.06621	5e-05	0.000584007	yes	8.06621
XLOC_005493	XLOC_005493	MMP12	chr11:102733463-102745764	KO	Rescue	OK	56.0868	22.9515	-1.28907	-8.05496	5e-05	0.000584007	yes	8.05496
XLOC_029620	XLOC_029620	CD24	chrY:21094584-21239302	KO	Rescue	OK	312.49	130.654	-1.25806	-8.04546	5e-05	0.000584007	yes	8.04546
XLOC_005830	XLOC_005830	PDE3A	chr12:20521195-20837041	KO	Rescue	OK	16.6849	39.7518	1.25248	8.0421	5e-05	0.000584007	yes	8.0421
XLOC_015872	XLOC_015872	KRCC1	chr2:88326723-88355300	KO	Rescue	OK	3.48276	0.708649	-2.29709	-7.91638	5e-05	0.000584007	yes	7.91638
XLOC_002470	XLOC_002470	ADAMTS4	chr1:161159537-161168868	KO	Rescue	OK	1.72926	0.440769	-1.97206	-7.87749	5e-05	0.000584007	yes	7.87749
XLOC_006505	XLOC_006505	EPS8	chr12:15773074-15942510	KO	Rescue	OK	0.919822	0.0706301	-3.703	-7.82342	5e-05	0.000584007	yes	7.82342
XLOC_004519	XLOC_004519	ALDH3B1	chr11:67776047-67796751	KO	Rescue	OK	15.752	37.0516	1.234	7.73241	5e-05	0.000584007	yes	7.73241
XLOC_011735	XLOC_011735	CCL5	chr17:34198495-34207377	KO	Rescue	OK	6.07982	1.48504	-2.03352	-7.70476	5e-05	0.000584007	yes	7.70476
XLOC_002660	XLOC_002660	LEMD1	chr1:205342379-205419104	KO	Rescue	OK	11.9819	0.705536	-4.08599	-7.67714	5e-05	0.000584007	yes	7.67714
XLOC_009455	XLOC_009455	MFGE8	chr15:89441913-89456663	KO	Rescue	OK	4.90423	1.44533	-1.76263	-7.64756	5e-05	0.000584007	yes	7.64756
XLOC_018892	XLOC_018892	MME	chr3:154741995-154901543	KO	Rescue	OK	2.0668	5.23333	1.34033	7.59653	5e-05	0.000584007	yes	7.59653
XLOC_006442	XLOC_006442	A2M	chr12:9208184-9295497	KO	Rescue	OK	1.76959	0.36781	-2.26638	-7.58943	5e-05	0.000584007	yes	7.58943
XLOC_014736	XLOC_014736	LTBP1	chr2:33172368-33624575	KO	Rescue	OK	2.00108	0.622572	-1.68447	-7.5677	5e-05	0.000584007	yes	7.5677
XLOC_011423	XLOC_011423	TEX19	chr17:80317122-80321652	KO	Rescue	OK	0.871917	3.47898	1.9964	7.53129	5e-05	0.000584007	yes	7.53129
XLOC_008862	XLOC_008862	LOXL1	chr15:74209808-74244478	KO	Rescue	OK	6.0219	1.9716	-1.61085	-7.45228	5e-05	0.000584007	yes	7.45228
XLOC_000592	XLOC_000592	PRKACB	chr1:84543744-84704181	KO	Rescue	OK	4.61474	11.1807	1.2767	7.4353	5e-05	0.000584007	yes	7.4353
XLOC_004555	XLOC_004555	FOLR1	chr11:71900601-71907367	KO	Rescue	OK	51.8855	21.6492	-1.26102	-7.41295	5e-05	0.000584007	yes	7.41295
XLOC_018736	XLOC_018736	SLC15A2	chr3:121613107-121663034	KO	Rescue	OK	0.739625	0.0321421	-4.52426	-7.40052	5e-05	0.000584007	yes	7.40052
XLOC_018667	XLOC_018667	TMEM45A	chr3:100211024-100296286	KO	Rescue	OK	13.6089	5.24081	-1.37669	-7.32542	5e-05	0.000584007	yes	7.32542
XLOC_025205	XLOC_025205	FOXP2	chr7:113726364-114333827	KO	Rescue	OK	0.195578	1.24355	2.66865	7.29684	5e-05	0.000584007	yes	7.29684
XLOC_008434	XLOC_008434	FBLN5	chr14:92335754-92414283	KO	Rescue	OK	3.43456	1.0686	-1.68441	-7.26378	5e-05	0.000584007	yes	7.26378
XLOC_009977	XLOC_009977	IL34	chr16:70613797-70694585	KO	Rescue	OK	2.75121	0.572046	-2.26586	-7.25963	5e-05	0.000584007	yes	7.25963
XLOC_015793	XLOC_015793	TGFA	chr2:70674411-70781147	KO	Rescue	OK	1.71187	0.494921	-1.79031	-7.25944	5e-05	0.000584007	yes	7.25944
XLOC_005719	XLOC_005719	C1S	chr12:7167979-7178335	KO	Rescue	OK	18.768	8.18349	-1.19749	-7.25388	5e-05	0.000584007	yes	7.25388
XLOC_016674	XLOC_016674	PKIG	chr20:43160435-43247678	KO	Rescue	OK	3.08466	0.254069	-3.60182	-7.22151	5e-05	0.000584007	yes	7.22151
XLOC_000699	XLOC_000699	SYPL2	chr1:110009099-110026283	KO	Rescue	OK	0.663381	2.42343	1.86914	7.18279	5e-05	0.000584007	yes	7.18279
XLOC_008458	XLOC_008458	CLMN	chr14:95648275-95786245	KO	Rescue	OK	3.70937	1.08216	-1.77727	-7.18108	5e-05	0.000584007	yes	7.18108
XLOC_000777	XLOC_000777	FAM46C	chr1:118148603-118171011	KO	Rescue	OK	7.97548	3.4992	-1.18855	-7.11556	5e-05	0.000584007	yes	7.11556
XLOC_000339	XLOC_000339	GJB3	chr1:35246789-35251967	KO	Rescue	OK	2.8881	0.756326	-1.93304	-7.07888	5e-05	0.000584007	yes	7.07888
XLOC_004785	XLOC_004785	VWA5A	chr11:123986110-124017618	KO	Rescue	OK	1.78295	0.156578	-3.50932	-7.0418	5e-05	0.000584007	yes	7.0418
XLOC_000693	XLOC_000693	KIAA1324,SCARNA2	chr1:109642802-109749403	KO	Rescue	OK	16.6869	1.50729	-3.46868	-7.00962	5e-05	0.000584007	yes	7.00962
XLOC_002454	XLOC_002454	ITLN1	chr1:160846329-160856307	KO	Rescue	OK	3.81981	0.703416	-2.44105	-7.00655	5e-05	0.000584007	yes	7.00655
XLOC_012446	XLOC_012446	RAB27B	chr18:52495524-52562800	KO	Rescue	OK	2.9851	1.1753	-1.34475	-6.99235	5e-05	0.000584007	yes	6.99235
XLOC_025387	XLOC_025387	TMEM176A	chr7:150488375-150522649	KO	Rescue	OK	10.743	0.27524	-5.28656	-6.97596	5e-05	0.000584007	yes	6.97596
XLOC_018695	XLOC_018695	PHLDB2,PLCXD2	chr3:111393503-111695364	KO	Rescue	OK	32.2938	15.2262	-1.0847	-6.84331	5e-05	0.000584007	yes	6.84331
XLOC_020680	XLOC_020680	SEC24D	chr4:119643977-119757326	KO	Rescue	OK	12.5985	5.77864	-1.12445	-6.82746	5e-05	0.000584007	yes	6.82746
XLOC_015688	XLOC_015688	-	chr2:42158748-42161765	KO	Rescue	OK	12.2316	3.95401	-1.62923	-6.79005	5e-05	0.000584007	yes	6.79005
XLOC_009378	XLOC_009378	CSPG4	chr15:75966662-76005189	KO	Rescue	OK	7.84089	3.67989	-1.09135	-6.75461	5e-05	0.000584007	yes	6.75461
XLOC_017693	XLOC_017693	GNAZ	chr22:23401592-23484241	KO	Rescue	OK	1.25278	0.244649	-2.35635	-6.73721	5e-05	0.000584007	yes	6.73721
XLOC_029336	XLOC_029336	SMARCA1	chrX:128580477-128657460	KO	Rescue	OK	1.55847	3.97535	1.35095	6.66913	5e-05	0.000584007	yes	6.66913
XLOC_004263	XLOC_004263	MADD	chr11:47290839-47351582	KO	Rescue	OK	5.57159	11.8124	1.08414	6.65679	5e-05	0.000584007	yes	6.65679
XLOC_026464	XLOC_026464	NOV	chr8:120428551-120436678	KO	Rescue	OK	21.8153	10.2894	-1.08417	-6.6376	5e-05	0.000584007	yes	6.6376
XLOC_026881	XLOC_026881	-	chr8:88553243-88579277	KO	Rescue	OK	0.878697	0.136419	-2.68732	-6.56639	5e-05	0.000584007	yes	6.56639
XLOC_025592	XLOC_025592	-	chr7:44585266-44591505	KO	Rescue	OK	0.402223	0.0355927	-3.49834	-6.55664	5e-05	0.000584007	yes	6.55664
XLOC_011292	XLOC_011292	-	chr17:68461113-68461177	KO	Rescue	OK	2961060	8061220	1.44488	6.44742	0.00275	0.0185037	yes	6.44742
XLOC_022799	XLOC_022799	AKAP12	chr6:151561133-151679694	KO	Rescue	OK	0.502997	0.131813	-1.93206	-6.44378	5e-05	0.000584007	yes	6.44378
XLOC_006215	XLOC_006215	CHST11	chr12:104850691-105155792	KO	Rescue	OK	1.85801	0.72563	-1.35646	-6.4184	5e-05	0.000584007	yes	6.4184
XLOC_025162	XLOC_025162	SERPINE1	chr7:100769909-100782547	KO	Rescue	OK	3.14813	1.21593	-1.37244	-6.3303	5e-05	0.000584007	yes	6.3303
XLOC_017547	XLOC_017547	TMPRSS3	chr21:43791971-43816955	KO	Rescue	OK	10.4512	4.22128	-1.30792	-6.31752	5e-05	0.000584007	yes	6.31752
XLOC_004504	XLOC_004504	C11orf86	chr11:66742574-66744482	KO	Rescue	OK	30.7684	14.4807	-1.08732	-6.31035	5e-05	0.000584007	yes	6.31035
XLOC_018835	XLOC_018835	IL20RB	chr3:136676492-136729927	KO	Rescue	OK	7.33584	3.03618	-1.27271	-6.30238	5e-05	0.000584007	yes	6.30238
XLOC_015459	XLOC_015459	ALPP	chr2:233243347-233247599	KO	Rescue	OK	19.6976	39.4039	1.00031	6.28906	5e-05	0.000584007	yes	6.28906
XLOC_011791	XLOC_011791	TNS4	chr17:38627975-38657910	KO	Rescue	OK	16.7035	8.15309	-1.03474	-6.26737	5e-05	0.000584007	yes	6.26737
XLOC_014674	XLOC_014674	EFR3B	chr2:25264972-25382004	KO	Rescue	OK	5.5985	2.71521	-1.04398	-6.26118	5e-05	0.000584007	yes	6.26118
XLOC_019897	XLOC_019897	-	chr4:19259551-19836640	KO	Rescue	OK	2.37578	0.245712	-3.27336	-6.26021	5e-05	0.000584007	yes	6.26021
XLOC_022200	XLOC_022200	CD83	chr6:14117486-14137148	KO	Rescue	OK	17.5881	8.52494	-1.04484	-6.23393	5e-05	0.000584007	yes	6.23393
XLOC_023418	XLOC_023418	-	chr6:117527663-117537622	KO	Rescue	OK	0.447334	0.131532	-1.76594	-6.2264	5e-05	0.000584007	yes	6.2264
XLOC_023083	XLOC_023083	NEU1	chr6:31826828-31830709	KO	Rescue	OK	24.2848	11.9792	-1.01953	-6.19293	5e-05	0.000584007	yes	6.19293
XLOC_014739	XLOC_014739	VIT	chr2:36923832-37041937	KO	Rescue	OK	5.96202	2.11145	-1.49757	-6.18026	5e-05	0.000584007	yes	6.18026
XLOC_007954	XLOC_007954	EML1	chr14:100259502-100408518	KO	Rescue	OK	3.32838	1.45257	-1.19621	-6.17406	5e-05	0.000584007	yes	6.17406
XLOC_002769	XLOC_002769	PGBD5	chr1:230457391-230561674	KO	Rescue	OK	0.900912	0.192742	-2.22471	-6.17262	5e-05	0.000584007	yes	6.17262
XLOC_019712	XLOC_019712	-	chr3:187185586-187188055	KO	Rescue	OK	2.49532	0.838384	-1.57354	-6.15767	5e-05	0.000584007	yes	6.15767
XLOC_014530	XLOC_014530	PPP6R1,TMEM86B	chr19:55737606-55770498	KO	Rescue	OK	25.0045	49.3238	0.980098	6.15314	5e-05	0.000584007	yes	6.15314
XLOC_025970	XLOC_025970	SVOPL	chr7:138276517-138386145	KO	Rescue	OK	9.43752	20.0982	1.09058	6.11981	5e-05	0.000584007	yes	6.11981
XLOC_008879	XLOC_008879	SCAMP5	chr15:75287875-75313836	KO	Rescue	OK	1.22459	0.334542	-1.87204	-6.11334	5e-05	0.000584007	yes	6.11334
XLOC_012860	XLOC_012860	VAV1	chr19:6772678-6857377	KO	Rescue	OK	1.10105	3.34299	1.60226	6.103	5e-05	0.000584007	yes	6.103
XLOC_004647	XLOC_004647	HEPHL1	chr11:93754377-93847374	KO	Rescue	OK	0.579695	0.0858632	-2.75518	-6.073	5e-05	0.000584007	yes	6.073
XLOC_011201	XLOC_011201	HLF	chr17:53342320-53402426	KO	Rescue	OK	0.72043	0.209047	-1.78503	-6.07254	5e-05	0.000584007	yes	6.07254
XLOC_028609	XLOC_028609	ZXDB	chrX:57618268-57623910	KO	Rescue	OK	13.3594	25.7725	0.947974	6.07101	5e-05	0.000584007	yes	6.07101
XLOC_000428	XLOC_000428	DMAP1	chr1:44678969-44686375	KO	Rescue	OK	22.939	45.2671	0.980662	6.06866	5e-05	0.000584007	yes	6.06866
XLOC_010978	XLOC_010978	SLFN5	chr17:33570051-33600629	KO	Rescue	OK	6.46282	2.93015	-1.14119	-6.06838	5e-05	0.000584007	yes	6.06838
XLOC_021507	XLOC_021507	-	chr5:852214-859661	KO	Rescue	OK	4.21251	2.02602	-1.05603	-6.06216	5e-05	0.000584007	yes	6.06216
XLOC_017389	XLOC_017389	COL6A1	chr21:47401662-47424963	KO	Rescue	OK	1.23505	0.408313	-1.59683	-6.055	5e-05	0.000584007	yes	6.055
XLOC_006704	XLOC_006704	ITGA5	chr12:54789044-54813050	KO	Rescue	OK	13.6099	6.87772	-0.984655	-6.0461	5e-05	0.000584007	yes	6.0461
XLOC_020162	XLOC_020162	EGF	chr4:110834002-110934118	KO	Rescue	OK	0.94497	0.315207	-1.58397	-5.99448	5e-05	0.000584007	yes	5.99448
XLOC_018109	XLOC_018109	SELM	chr22:31500762-31503551	KO	Rescue	OK	63.3699	31.3415	-1.01573	-5.98289	5e-05	0.000584007	yes	5.98289
XLOC_019580	XLOC_019580	PLSCR4	chr3:145910122-145968967	KO	Rescue	OK	4.63411	2.07031	-1.16244	-5.9786	5e-05	0.000584007	yes	5.9786
XLOC_018241	XLOC_018241	KIAA1644	chr22:44639547-44727962	KO	Rescue	OK	2.05975	4.2243	1.03624	5.97117	5e-05	0.000584007	yes	5.97117
XLOC_020931	XLOC_020931	-	chr5:24310794-24326440	KO	Rescue	OK	5.64791	2.78368	-1.02072	-5.9684	5e-05	0.000584007	yes	5.9684
XLOC_026629	XLOC_026629	PPP1R3B	chr8:8993763-9009152	KO	Rescue	OK	1.24174	0.465978	-1.41403	-5.9651	5e-05	0.000584007	yes	5.9651
XLOC_013042	XLOC_013042	GDF15	chr19:18496967-18499986	KO	Rescue	OK	6.31979	2.3565	-1.42323	-5.95427	5e-05	0.000584007	yes	5.95427
XLOC_028530	XLOC_028530	HDAC6	chrX:48659797-48683384	KO	Rescue	OK	4.46785	8.94046	1.00077	5.93954	5e-05	0.000584007	yes	5.93954
XLOC_006628	XLOC_006628	C1QL4	chr12:49726199-49730971	KO	Rescue	OK	1.70468	0.457616	-1.89729	-5.90986	5e-05	0.000584007	yes	5.90986
XLOC_021559	XLOC_021559	FAM134B	chr5:16473146-16617167	KO	Rescue	OK	0.963367	0.222242	-2.11595	-5.90412	5e-05	0.000584007	yes	5.90412
XLOC_021506	XLOC_021506	ZDHHC11	chr5:795719-851101	KO	Rescue	OK	13.9982	6.98059	-1.00382	-5.90226	5e-05	0.000584007	yes	5.90226
XLOC_012962	XLOC_012962	NFIX	chr19:13075986-13209610	KO	Rescue	OK	2.73859	1.23638	-1.14731	-5.87559	5e-05	0.000584007	yes	5.87559
XLOC_001455	XLOC_001455	SCCPDH	chr1:246887321-246931440	KO	Rescue	OK	6.78366	3.12532	-1.11806	-5.86754	5e-05	0.000584007	yes	5.86754
XLOC_020445	XLOC_020445	MIR573	chr4:24518884-24527646	KO	Rescue	OK	0.8954	4.03628	2.17242	5.8354	5e-05	0.000584007	yes	5.8354
XLOC_026250	XLOC_026250	C8orf4	chr8:40010986-40012827	KO	Rescue	OK	15.5568	7.65505	-1.02306	-5.83477	5e-05	0.000584007	yes	5.83477
XLOC_022757	XLOC_022757	KIAA1244	chr6:138483052-138665800	KO	Rescue	OK	0.66882	0.285656	-1.22734	-5.82969	5e-05	0.000584007	yes	5.82969
XLOC_003803	XLOC_003803	SORBS1	chr10:97071529-97321185	KO	Rescue	OK	1.43186	0.579313	-1.30548	-5.81668	5e-05	0.000584007	yes	5.81668
XLOC_019711	XLOC_019711	-	chr3:187184039-187185393	KO	Rescue	OK	3.6478	1.1935	-1.61182	-5.81328	5e-05	0.000584007	yes	5.81328
XLOC_006665	XLOC_006665	KRT5	chr12:52908358-52914243	KO	Rescue	OK	2.53209	0.020746	-6.93135	-5.81075	0.00265	0.0180043	yes	5.81075
XLOC_012016	XLOC_012016	DLX3	chr17:48067368-48072588	KO	Rescue	OK	3.63335	1.5192	-1.25798	-5.80466	5e-05	0.000584007	yes	5.80466
XLOC_014738	XLOC_014738	CRIM1	chr2:36582865-36778428	KO	Rescue	OK	54.437	29.1903	-0.899096	-5.79687	5e-05	0.000584007	yes	5.79687
XLOC_026678	XLOC_026678	PHYHIP	chr8:22077215-22089851	KO	Rescue	OK	5.22059	2.23808	-1.22195	-5.77442	5e-05	0.000584007	yes	5.77442
XLOC_006614	XLOC_006614	-	chr12:49295629-49297866	KO	Rescue	OK	1.02678	0.191875	-2.41989	-5.76679	5e-05	0.000584007	yes	5.76679
XLOC_022591	XLOC_022591	NT5E	chr6:86159301-86205509	KO	Rescue	OK	0.941002	0.283965	-1.72848	-5.76164	5e-05	0.000584007	yes	5.76164
XLOC_012390	XLOC_012390	TAF4B	chr18:23806408-23971650	KO	Rescue	OK	3.21152	6.72687	1.06668	5.75203	5e-05	0.000584007	yes	5.75203
XLOC_004883	XLOC_004883	CDKN1C	chr11:2904447-2906995	KO	Rescue	OK	30.8223	15.9694	-0.948659	-5.75118	5e-05	0.000584007	yes	5.75118
XLOC_029167	XLOC_029167	PJA1	chrX:68380580-68385365	KO	Rescue	OK	4.1094	1.78072	-1.20647	-5.72072	5e-05	0.000584007	yes	5.72072
XLOC_008068	XLOC_008068	TRAF3	chr14:103243758-103377837	KO	Rescue	OK	2.93947	5.66576	0.946711	5.70984	5e-05	0.000584007	yes	5.70984
XLOC_015722	XLOC_015722	-	chr2:53467123-53732968	KO	Rescue	OK	0.963633	2.19256	1.18606	5.70606	5e-05	0.000584007	yes	5.70606
XLOC_008707	XLOC_008707	HAUS2	chr15:42841010-42862720	KO	Rescue	OK	8.58793	16.2432	0.919458	5.68367	5e-05	0.000584007	yes	5.68367
XLOC_014775	XLOC_014775	EPAS1	chr2:46524540-46613842	KO	Rescue	OK	45.148	24.5784	-0.877271	-5.66479	5e-05	0.000584007	yes	5.66479
XLOC_021442	XLOC_021442	FGFR4	chr5:176513874-176525126	KO	Rescue	OK	4.82051	9.62787	0.998031	5.65619	5e-05	0.000584007	yes	5.65619
XLOC_027151	XLOC_027151	SLC1A1	chr9:4490426-4587469	KO	Rescue	OK	1.40111	0.508738	-1.46158	-5.64634	5e-05	0.000584007	yes	5.64634
XLOC_026137	XLOC_026137	ZDHHC2	chr8:17013485-17083158	KO	Rescue	OK	1.18613	2.6881	1.18032	5.64099	5e-05	0.000584007	yes	5.64099
XLOC_000017	XLOC_000017	AGRN	chr1:955436-991499	KO	Rescue	OK	19.8628	36.465	0.876443	5.63813	5e-05	0.000584007	yes	5.63813
XLOC_004162	XLOC_004162	TMEM86A	chr11:18720350-18747777	KO	Rescue	OK	0.487926	0.0435006	-3.48756	-5.62182	5e-05	0.000584007	yes	5.62182
XLOC_018332	XLOC_018332	HRH1	chr3:11178778-11304939	KO	Rescue	OK	0.748452	0.209735	-1.83535	-5.60991	5e-05	0.000584007	yes	5.60991
XLOC_018156	XLOC_018156	ELFN2	chr22:37763999-37823505	KO	Rescue	OK	0.51628	0.176359	-1.54964	-5.60631	5e-05	0.000584007	yes	5.60631
XLOC_016120	XLOC_016120	SCN9A	chr2:167028063-167232497	KO	Rescue	OK	0.0341919	0.3985	3.54286	5.58788	5e-05	0.000584007	yes	5.58788
XLOC_019108	XLOC_019108	NUP210	chr3:13357486-13461836	KO	Rescue	OK	20.6128	37.3875	0.859014	5.57595	5e-05	0.000584007	yes	5.57595
XLOC_026421	XLOC_026421	-	chr8:101348202-101364133	KO	Rescue	OK	2.52184	1.16677	-1.11195	-5.57327	5e-05	0.000584007	yes	5.57327
XLOC_011386	XLOC_011386	RPTOR	chr17:78518609-78940381	KO	Rescue	OK	12.3451	22.5125	0.866791	5.55144	5e-05	0.000584007	yes	5.55144
XLOC_002648	XLOC_002648	PLEKHA6	chr1:204187978-204329057	KO	Rescue	OK	0.785095	0.304891	-1.36457	-5.55015	5e-05	0.000584007	yes	5.55015
XLOC_022839	XLOC_022839	IGF2R	chr6:160390062-160532517	KO	Rescue	OK	12.961	23.6132	0.86542	5.54664	5e-05	0.000584007	yes	5.54664
XLOC_014997	XLOC_014997	IL1R1	chr2:102770401-102796334	KO	Rescue	OK	0.335084	0.0391571	-3.09718	-5.53981	5e-05	0.000584007	yes	5.53981
XLOC_016339	XLOC_016339	SERPINE2	chr2:224839764-224904036	KO	Rescue	OK	16.1213	8.36057	-0.947296	-5.53349	5e-05	0.000584007	yes	5.53349
XLOC_004123	XLOC_004123	LOC729013	chr11:10879763-10900823	KO	Rescue	OK	5.8928	2.27585	-1.37255	-5.53143	5e-05	0.000584007	yes	5.53143
XLOC_011371	XLOC_011371	C1QTNF1	chr17:77015210-77045936	KO	Rescue	OK	2.56225	1.00596	-1.34884	-5.50046	5e-05	0.000584007	yes	5.50046
XLOC_005672	XLOC_005672	CCND2	chr12:4382901-4414522	KO	Rescue	OK	0.0064281	0.679708	6.72438	5.49917	0.0001	0.00109908	yes	5.49917
XLOC_003425	XLOC_003425	PPP2R2D	chr10:133747957-133773406	KO	Rescue	OK	7.31062	14.9115	1.02836	5.49321	5e-05	0.000584007	yes	5.49321
XLOC_012330	XLOC_012330	ARHGAP28	chr18:6728982-6915713	KO	Rescue	OK	1.61167	3.71172	1.20354	5.4827	5e-05	0.000584007	yes	5.4827
XLOC_013823	XLOC_013823	CD70	chr19:6581600-6604097	KO	Rescue	OK	81.7042	40.3475	-1.01793	-5.44433	5e-05	0.000584007	yes	5.44433
XLOC_006283	XLOC_006283	CCDC64	chr12:120426996-120532299	KO	Rescue	OK	2.94467	1.33115	-1.14543	-5.43144	5e-05	0.000584007	yes	5.43144
XLOC_001267	XLOC_001267	RASSF5	chr1:206680878-206762658	KO	Rescue	OK	8.78216	4.62596	-0.924825	-5.4267	5e-05	0.000584007	yes	5.4267
XLOC_018735	XLOC_018735	EAF2	chr3:121554033-121605373	KO	Rescue	OK	3.07238	0.848515	-1.85634	-5.39585	5e-05	0.000584007	yes	5.39585
XLOC_028390	XLOC_028390	WWC3	chrX:9983794-10112518	KO	Rescue	OK	0.229239	0.0170856	-3.746	-5.39313	5e-05	0.000584007	yes	5.39313
XLOC_016940	XLOC_016940	-	chr20:23607248-23614221	KO	Rescue	OK	0.770865	0.175491	-2.13508	-5.36593	5e-05	0.000584007	yes	5.36593
XLOC_005205	XLOC_005205	FADS3	chr11:61640991-61659080	KO	Rescue	OK	15.4349	28.6212	0.890883	5.35034	5e-05	0.000584007	yes	5.35034
XLOC_012399	XLOC_012399	RNF125	chr18:29598385-29653154	KO	Rescue	OK	1.04629	2.17002	1.05242	5.34596	5e-05	0.000584007	yes	5.34596
XLOC_011936	XLOC_011936	C1QL1	chr17:43037060-43045644	KO	Rescue	OK	22.3601	11.9117	-0.90855	-5.31778	5e-05	0.000584007	yes	5.31778
XLOC_012227	XLOC_012227	NPTX1	chr17:78440491-78451318	KO	Rescue	OK	62.3158	110.922	0.831876	5.31647	5e-05	0.000584007	yes	5.31647
XLOC_007066	XLOC_007066	ZNF605	chr12:133497958-133532892	KO	Rescue	OK	0.92409	1.93841	1.06877	5.31527	5e-05	0.000584007	yes	5.31527
XLOC_020713	XLOC_020713	SLC7A11	chr4:138948576-139163587	KO	Rescue	OK	3.20382	5.82665	0.862877	5.31181	5e-05	0.000584007	yes	5.31181
XLOC_000953	XLOC_000953	ATP8B2	chr1:154298035-154323780	KO	Rescue	OK	1.44656	0.628703	-1.20218	-5.2958	5e-05	0.000584007	yes	5.2958
XLOC_021974	XLOC_021974	ARSI	chr5:149675908-149682525	KO	Rescue	OK	0.838601	0.234379	-1.83914	-5.28935	5e-05	0.000584007	yes	5.28935
XLOC_019392	XLOC_019392	PROS1	chr3:93591880-93692934	KO	Rescue	OK	5.27156	2.68968	-0.970795	-5.28393	5e-05	0.000584007	yes	5.28393
XLOC_006796	XLOC_006796	PTPRR	chr12:71031852-71314584	KO	Rescue	OK	13.8398	7.36599	-0.909871	-5.27846	5e-05	0.000584007	yes	5.27846
XLOC_009197	XLOC_009197	FBN1	chr15:48700502-48937985	KO	Rescue	OK	4.89491	2.70481	-0.855753	-5.2778	5e-05	0.000584007	yes	5.2778
XLOC_025606	XLOC_025606	NACAD	chr7:45120035-45128493	KO	Rescue	OK	0.0366526	0.320259	3.12725	5.26306	5e-05	0.000584007	yes	5.26306
XLOC_005720	XLOC_005720	C1RL-AS1,CLSTN3	chr12:7247145-7311530	KO	Rescue	OK	11.4194	5.33934	-1.09676	-5.25156	5e-05	0.000584007	yes	5.25156
XLOC_008798	XLOC_008798	USP3	chr15:63796671-63894620	KO	Rescue	OK	5.83891	10.7089	0.875044	5.2493	5e-05	0.000584007	yes	5.2493
XLOC_010857	XLOC_010857	TRIM16L	chr17:18625401-18642344	KO	Rescue	OK	26.323	46.9509	0.834829	5.23166	5e-05	0.000584007	yes	5.23166
XLOC_018182	XLOC_018182	NPTXR	chr22:39214455-39240017	KO	Rescue	OK	2.46991	1.23144	-1.00412	-5.22623	5e-05	0.000584007	yes	5.22623
XLOC_004672	XLOC_004672	BIRC3	chr11:102188180-102210135	KO	Rescue	OK	2.79408	1.43316	-0.963171	-5.21796	5e-05	0.000584007	yes	5.21796
XLOC_007754	XLOC_007754	FRMD6	chr14:51921229-52197444	KO	Rescue	OK	1.58441	0.69158	-1.19598	-5.20619	5e-05	0.000584007	yes	5.20619
XLOC_006847	XLOC_006847	DUSP6	chr12:89741836-89746296	KO	Rescue	OK	0.592884	1.58125	1.41524	5.20298	5e-05	0.000584007	yes	5.20298
XLOC_001863	XLOC_001863	SLC6A9	chr1:44457279-44497256	KO	Rescue	OK	10.9224	19.8661	0.863023	5.18031	5e-05	0.000584007	yes	5.18031
XLOC_004335	XLOC_004335	DTX4	chr11:58939811-58980494	KO	Rescue	OK	3.70448	6.72313	0.85986	5.16504	5e-05	0.000584007	yes	5.16504
XLOC_000221	XLOC_000221	EPHB2	chr1:23037306-23241823	KO	Rescue	OK	1.71588	0.469012	-1.87125	-5.1503	5e-05	0.000584007	yes	5.1503
XLOC_006744	XLOC_006744	TAC3	chr12:57403780-57410684	KO	Rescue	OK	11.4878	5.13409	-1.16192	-5.14912	5e-05	0.000584007	yes	5.14912
XLOC_027386	XLOC_027386	PHF2	chr9:96338173-96441870	KO	Rescue	OK	9.25406	5.11308	-0.855895	-5.11872	5e-05	0.000584007	yes	5.11872
XLOC_026409	XLOC_026409	CPQ	chr8:97657472-98161761	KO	Rescue	OK	5.27717	2.48087	-1.08892	-5.11758	5e-05	0.000584007	yes	5.11758
XLOC_010478	XLOC_010478	RRAD	chr16:66955581-66959439	KO	Rescue	OK	1.33197	0.129095	-3.36705	-5.11734	5e-05	0.000584007	yes	5.11734
XLOC_017904	XLOC_017904	FBLN1	chr22:45898718-45997014	KO	Rescue	OK	118.471	68.1356	-0.798049	-5.11423	5e-05	0.000584007	yes	5.11423
XLOC_025751	XLOC_025751	STEAP4	chr7:87905618-87936228	KO	Rescue	OK	2.90278	1.44212	-1.00924	-5.11075	5e-05	0.000584007	yes	5.11075
XLOC_021725	XLOC_021725	ENC1	chr5:73923208-73937249	KO	Rescue	OK	1.43083	0.620703	-1.20488	-5.1099	5e-05	0.000584007	yes	5.1099
XLOC_023161	XLOC_023161	BTBD9	chr6:38136226-38607924	KO	Rescue	OK	0.523769	0.203706	-1.36244	-5.10745	5e-05	0.000584007	yes	5.10745
XLOC_019415	XLOC_019415	CD47	chr3:107761940-107809935	KO	Rescue	OK	7.21767	3.99241	-0.854274	-5.10565	5e-05	0.000584007	yes	5.10565
XLOC_003311	XLOC_003311	ELOVL3	chr10:103986142-103989344	KO	Rescue	OK	5.1411	2.19254	-1.22947	-5.10486	5e-05	0.000584007	yes	5.10486
XLOC_010838	XLOC_010838	-	chr17:16931492-16933943	KO	Rescue	OK	0.834246	0.177387	-2.23357	-5.10433	5e-05	0.000584007	yes	5.10433
XLOC_019719	XLOC_019719	CLDN1	chr3:190023489-190040235	KO	Rescue	OK	0.945016	0.32042	-1.56037	-5.08854	5e-05	0.000584007	yes	5.08854
XLOC_005889	XLOC_005889	TMEM117	chr12:44229555-44783541	KO	Rescue	OK	1.3875	3.00264	1.11375	5.08506	5e-05	0.000584007	yes	5.08506
XLOC_004312	XLOC_004312	RTN4RL2	chr11:57227560-57245009	KO	Rescue	OK	31.8411	57.6837	0.857274	5.06405	5e-05	0.000584007	yes	5.06405
XLOC_002977	XLOC_002977	-	chr10:33271020-33371030	KO	Rescue	OK	0.666145	0.213544	-1.6413	-5.06076	5e-05	0.000584007	yes	5.06076
XLOC_008774	XLOC_008774	TCF12	chr15:57178367-57581647	KO	Rescue	OK	12.8108	22.2949	0.799358	5.05345	5e-05	0.000584007	yes	5.05345
XLOC_017106	XLOC_017106	KCNG1	chr20:49620192-49639675	KO	Rescue	OK	0.806758	0.104316	-2.95117	-5.0472	5e-05	0.000584007	yes	5.0472
XLOC_014259	XLOC_014259	PSG4	chr19:43696797-43709926	KO	Rescue	OK	1.59835	0.259314	-2.62381	-5.04463	5e-05	0.000584007	yes	5.04463
XLOC_027602	XLOC_027602	AIF1L	chr9:133971862-133998539	KO	Rescue	OK	11.1307	19.4125	0.802442	5.03778	5e-05	0.000584007	yes	5.03778
XLOC_000696	XLOC_000696	C1orf194	chr1:109642802-109749403	KO	Rescue	OK	3.65137	0.105225	-5.11689	-5.01773	0.0001	0.00109908	yes	5.01773
XLOC_001667	XLOC_001667	RAP1GAP	chr1:21922707-21995856	KO	Rescue	OK	2.52437	4.88565	0.952629	5.00472	5e-05	0.000584007	yes	5.00472
XLOC_014095	XLOC_014095	CEBPA	chr19:33790839-33793430	KO	Rescue	OK	47.0907	27.3615	-0.783297	-5.00443	5e-05	0.000584007	yes	5.00443
XLOC_007760	XLOC_007760	GPR137C	chr14:53019865-53104431	KO	Rescue	OK	0.627379	0.183732	-1.77173	-4.99377	5e-05	0.000584007	yes	4.99377
XLOC_003106	XLOC_003106	HKDC1	chr10:70980058-71027315	KO	Rescue	OK	1.06761	0.363542	-1.5542	-4.98016	5e-05	0.000584007	yes	4.98016
XLOC_009008	XLOC_009008	SLCO3A1	chr15:92396387-92715665	KO	Rescue	OK	11.9156	21.1194	0.825719	4.97915	5e-05	0.000584007	yes	4.97915
XLOC_011329	XLOC_011329	ITGB4	chr17:73717400-73753899	KO	Rescue	OK	1.35604	0.627935	-1.11072	-4.97372	5e-05	0.000584007	yes	4.97372
XLOC_027993	XLOC_027993	GAS1	chr9:89559276-89562104	KO	Rescue	OK	37.9993	22.1321	-0.779832	-4.96467	5e-05	0.000584007	yes	4.96467
XLOC_012066	XLOC_012066	HEATR6,MIR4737	chr17:58118404-58156361	KO	Rescue	OK	7.82799	14.0248	0.841271	4.95727	5e-05	0.000584007	yes	4.95727
XLOC_008788	XLOC_008788	GCNT3	chr15:59902051-59912474	KO	Rescue	OK	0.757389	0.141282	-2.42245	-4.95501	5e-05	0.000584007	yes	4.95501
XLOC_023440	XLOC_023440	ARHGAP18	chr6:129897277-130031435	KO	Rescue	OK	14.7439	25.307	0.77942	4.92677	5e-05	0.000584007	yes	4.92677
XLOC_026949	XLOC_026949	-	chr8:104255810-104298115	KO	Rescue	OK	0.725521	0.202468	-1.84132	-4.92529	5e-05	0.000584007	yes	4.92529
XLOC_013164	XLOC_013164	APLP1	chr19:36359400-36370699	KO	Rescue	OK	9.20634	4.9678	-0.890023	-4.92486	5e-05	0.000584007	yes	4.92486
XLOC_005161	XLOC_005161	SLC43A3	chr11:57174421-57195053	KO	Rescue	OK	123.883	210.618	0.765655	4.91352	5e-05	0.000584007	yes	4.91352
XLOC_021048	XLOC_021048	MAST4	chr5:65892175-66465423	KO	Rescue	OK	1.36711	0.66871	-1.03167	-4.90932	5e-05	0.000584007	yes	4.90932
XLOC_021677	XLOC_021677	PLK2	chr5:57749809-57755966	KO	Rescue	OK	68.2026	40.207	-0.762381	-4.90831	5e-05	0.000584007	yes	4.90831
XLOC_022992	XLOC_022992	HIST1H2BK	chr6:27106071-27114637	KO	Rescue	OK	75.6179	43.5167	-0.79716	-4.90223	5e-05	0.000584007	yes	4.90223
XLOC_020063	XLOC_020063	EPGN	chr4:75174056-75183201	KO	Rescue	OK	1.86488	0.778171	-1.26092	-4.9015	5e-05	0.000584007	yes	4.9015
XLOC_004248	XLOC_004248	GYLTL1B	chr11:45943195-45950647	KO	Rescue	OK	0.856142	2.02494	1.24196	4.8935	5e-05	0.000584007	yes	4.8935
XLOC_019002	XLOC_019002	ST6GAL1	chr3:186648314-186796341	KO	Rescue	OK	11.6625	6.70993	-0.797501	-4.88772	5e-05	0.000584007	yes	4.88772
XLOC_001674	XLOC_001674	HTR1D	chr1:23510674-23544012	KO	Rescue	OK	1.68301	0.674892	-1.31831	-4.88456	5e-05	0.000584007	yes	4.88456
XLOC_014262	XLOC_014262	-	chr19:43827709-43833606	KO	Rescue	OK	1.70125	0.846347	-1.00727	-4.87617	5e-05	0.000584007	yes	4.87617
XLOC_020164	XLOC_020164	C4orf32	chr4:113066552-113110237	KO	Rescue	OK	1.91634	0.817422	-1.2292	-4.85941	5e-05	0.000584007	yes	4.85941
XLOC_023586	XLOC_023586	LINC00473	chr6:166319586-166403103	KO	Rescue	OK	39.3817	77.2006	0.971085	4.85901	5e-05	0.000584007	yes	4.85901
XLOC_002126	XLOC_002126	DENND2D	chr1:111728590-111747160	KO	Rescue	OK	0.569677	0.0329731	-4.11078	-4.85579	5e-05	0.000584007	yes	4.85579
XLOC_027853	XLOC_027853	ENHO	chr9:34521039-34523037	KO	Rescue	OK	1.65315	0.347804	-2.24887	-4.8494	5e-05	0.000584007	yes	4.8494
XLOC_025612	XLOC_025612	IGFBP3	chr7:45951843-45960871	KO	Rescue	OK	8.47039	14.8694	0.81185	4.84794	5e-05	0.000584007	yes	4.84794
XLOC_011648	XLOC_011648	ALDH3A1	chr17:19641297-19651746	KO	Rescue	OK	0.588076	1.79986	1.61381	4.83668	5e-05	0.000584007	yes	4.83668
XLOC_027831	XLOC_027831	-	chr9:33226240-33231431	KO	Rescue	OK	0.257222	0.043217	-2.57334	-4.83302	5e-05	0.000584007	yes	4.83302
XLOC_002246	XLOC_002246	GJA5	chr1:147228331-147245484	KO	Rescue	OK	0.927514	0.319434	-1.53785	-4.83031	5e-05	0.000584007	yes	4.83031
XLOC_015609	XLOC_015609	KIF3C	chr2:26149454-26205443	KO	Rescue	OK	2.36343	1.23091	-0.941155	-4.8119	5e-05	0.000584007	yes	4.8119
XLOC_021054	XLOC_021054	CDK7	chr5:68530621-68573257	KO	Rescue	OK	13.8931	24.3525	0.809702	4.81038	5e-05	0.000584007	yes	4.81038
XLOC_007260	XLOC_007260	GPC5	chr13:92050858-93519487	KO	Rescue	OK	2.10131	4.25337	1.01732	4.80868	5e-05	0.000584007	yes	4.80868
XLOC_016510	XLOC_016510	ISM1	chr20:13202417-13281297	KO	Rescue	OK	2.06832	0.900198	-1.20015	-4.80385	5e-05	0.000584007	yes	4.80385
XLOC_001867	XLOC_001867	-	chr1:44653464-44678247	KO	Rescue	OK	0.191288	2.63906	3.78621	4.79797	5e-05	0.000584007	yes	4.79797
XLOC_017279	XLOC_017279	DOPEY2	chr21:37529063-37666602	KO	Rescue	OK	0.801668	1.55708	0.957763	4.79008	5e-05	0.000584007	yes	4.79008
XLOC_012427	XLOC_012427	RNF165	chr18:43914186-44040783	KO	Rescue	OK	1.01388	0.293289	-1.7895	-4.78451	5e-05	0.000584007	yes	4.78451
XLOC_021336	XLOC_021336	AFAP1L1	chr5:148651303-148722154	KO	Rescue	OK	4.04395	2.1835	-0.889126	-4.77591	5e-05	0.000584007	yes	4.77591
XLOC_014153	XLOC_014153	ZNF569	chr19:37902022-37958339	KO	Rescue	OK	0.495675	1.1846	1.25694	4.76904	5e-05	0.000584007	yes	4.76904
XLOC_017551	XLOC_017551	-	chr21:44237251-44244627	KO	Rescue	OK	0.37912	0.130234	-1.54155	-4.75202	5e-05	0.000584007	yes	4.75202
XLOC_027704	XLOC_027704	EHMT1	chr9:140500089-140730578	KO	Rescue	OK	7.24597	14.1476	0.965305	4.75024	5e-05	0.000584007	yes	4.75024
XLOC_027452	XLOC_027452	ZNF462	chr9:109625377-109848716	KO	Rescue	OK	0.200337	0.0474212	-2.07883	-4.74452	5e-05	0.000584007	yes	4.74452
XLOC_016729	XLOC_016729	TSHZ2	chr20:51588718-52111869	KO	Rescue	OK	0.390352	1.00152	1.35934	4.74452	5e-05	0.000584007	yes	4.74452
XLOC_023111	XLOC_023111	HLA-DMA	chr6:32916390-32920899	KO	Rescue	OK	4.09434	1.68055	-1.2847	-4.73821	5e-05	0.000584007	yes	4.73821
XLOC_015923	XLOC_015923	MGAT4A	chr2:99235568-99347589	KO	Rescue	OK	3.61072	1.96685	-0.876398	-4.73757	5e-05	0.000584007	yes	4.73757
XLOC_004118	XLOC_004118	ADM	chr11:10326641-10328923	KO	Rescue	OK	4.08235	7.97433	0.965965	4.73566	5e-05	0.000584007	yes	4.73566
XLOC_028107	XLOC_028107	SVEP1	chr9:113127528-113342518	KO	Rescue	OK	1.97673	3.53724	0.83951	4.72166	5e-05	0.000584007	yes	4.72166
XLOC_013439	XLOC_013439	-	chr19:50441885-50444992	KO	Rescue	OK	0.399706	0.0497492	-3.00619	-4.70536	5e-05	0.000584007	yes	4.70536
XLOC_002403	XLOC_002403	CRABP2	chr1:156669369-156686462	KO	Rescue	OK	351.161	211.43	-0.731954	-4.70472	5e-05	0.000584007	yes	4.70472
XLOC_028179	XLOC_028179	GPR144	chr9:127208175-127239379	KO	Rescue	OK	2.22801	4.09582	0.878398	4.69566	5e-05	0.000584007	yes	4.69566
XLOC_014609	XLOC_014609	-	chr2:881512-887210	KO	Rescue	OK	0.334631	0.782819	1.22611	4.68086	5e-05	0.000584007	yes	4.68086
XLOC_005414	XLOC_005414	RSF1	chr11:77371005-77532060	KO	Rescue	OK	6.92783	12.2416	0.821322	4.67422	5e-05	0.000584007	yes	4.67422
XLOC_009216	XLOC_009216	HDC	chr15:50534048-50558162	KO	Rescue	OK	1.81954	0.62401	-1.54393	-4.66952	5e-05	0.000584007	yes	4.66952
XLOC_015460	XLOC_015460	ALPPL2	chr2:233271551-233275424	KO	Rescue	OK	0.693734	1.67876	1.27494	4.66882	5e-05	0.000584007	yes	4.66882
XLOC_001483	XLOC_001483	-	chr1:248465899-248493110	KO	Rescue	OK	1.78806	0.657014	-1.4444	-4.65912	5e-05	0.000584007	yes	4.65912
XLOC_020278	XLOC_020278	LOC100506013	chr4:165798155-165818676	KO	Rescue	OK	1.04532	0.361625	-1.53137	-4.65223	5e-05	0.000584007	yes	4.65223
XLOC_015689	XLOC_015689	C2orf91	chr2:42162497-42224234	KO	Rescue	OK	0.439915	0.0620922	-2.82474	-4.64983	5e-05	0.000584007	yes	4.64983
XLOC_028619	XLOC_028619	EFNB1	chrX:68048839-68062006	KO	Rescue	OK	6.27546	3.52677	-0.831374	-4.63708	5e-05	0.000584007	yes	4.63708
XLOC_020661	XLOC_020661	CFI	chr4:110661847-110723335	KO	Rescue	OK	0.710739	0.156596	-2.18227	-4.63628	5e-05	0.000584007	yes	4.63628
XLOC_003998	XLOC_003998	IFITM1	chr11:309565-315272	KO	Rescue	OK	54.2434	31.2095	-0.797462	-4.63616	5e-05	0.000584007	yes	4.63616
XLOC_021413	XLOC_021413	NEURL1B	chr5:172068159-172118535	KO	Rescue	OK	4.39026	2.50416	-0.809979	-4.63463	5e-05	0.000584007	yes	4.63463
XLOC_023617	XLOC_023617	-	chr6:170465683-170469682	KO	Rescue	OK	0.146406	0.504972	1.78623	4.62981	5e-05	0.000584007	yes	4.62981
XLOC_022047	XLOC_022047	DUSP1	chr5:172195092-172198203	KO	Rescue	OK	24.9507	14.8089	-0.752617	-4.61562	5e-05	0.000584007	yes	4.61562
XLOC_021250	XLOC_021250	TGFBI	chr5:135364583-135399507	KO	Rescue	OK	12.6233	7.36562	-0.777215	-4.61322	5e-05	0.000584007	yes	4.61322
XLOC_019432	XLOC_019432	CCDC80	chr3:112323408-112360129	KO	Rescue	OK	4.31353	2.40247	-0.844352	-4.61287	5e-05	0.000584007	yes	4.61287
XLOC_018691	XLOC_018691	PVRL3	chr3:110790605-110913534	KO	Rescue	OK	0.0898962	0.415106	2.20715	4.61233	5e-05	0.000584007	yes	4.61233
XLOC_021567	XLOC_021567	CDH12	chr5:21750972-22853731	KO	Rescue	OK	0.442833	0.110635	-2.00096	-4.61209	5e-05	0.000584007	yes	4.61209
XLOC_028315	XLOC_028315	ENTPD2	chr9:139942550-139948561	KO	Rescue	OK	4.75955	2.44682	-0.959919	-4.57939	5e-05	0.000584007	yes	4.57939
XLOC_022299	XLOC_022299	ZKSCAN3	chr6:28292514-28340428	KO	Rescue	OK	5.07343	2.0788	-1.28721	-4.57701	5e-05	0.000584007	yes	4.57701
XLOC_009828	XLOC_009828	GPT2	chr16:46918189-46965201	KO	Rescue	OK	12.1024	20.0017	0.724827	4.5715	5e-05	0.000584007	yes	4.5715
XLOC_028270	XLOC_028270	-	chr9:137514715-137516854	KO	Rescue	OK	0.67725	0.143961	-2.23401	-4.57039	5e-05	0.000584007	yes	4.57039
XLOC_010740	XLOC_010740	BCL6B	chr17:6926368-6933848	KO	Rescue	OK	4.0305	7.04695	0.80604	4.56758	5e-05	0.000584007	yes	4.56758
XLOC_019486	XLOC_019486	SLC12A8	chr3:124801479-124931609	KO	Rescue	OK	0.417001	0.0874744	-2.25312	-4.56597	5e-05	0.000584007	yes	4.56597
XLOC_025909	XLOC_025909	GPR37	chr7:124385654-124406079	KO	Rescue	OK	2.71797	4.84114	0.832816	4.54916	5e-05	0.000584007	yes	4.54916
XLOC_026412	XLOC_026412	MATN2	chr8:98881310-99048946	KO	Rescue	OK	6.07447	3.50365	-0.793899	-4.54861	5e-05	0.000584007	yes	4.54861
XLOC_025259	XLOC_025259	TSPAN33	chr7:128784711-128809534	KO	Rescue	OK	0.636644	0.165731	-1.94164	-4.54458	5e-05	0.000584007	yes	4.54458
XLOC_014642	XLOC_014642	LINC00570	chr2:11534106-11543296	KO	Rescue	OK	1.78815	0.604034	-1.56577	-4.53852	5e-05	0.000584007	yes	4.53852
XLOC_019311	XLOC_019311	TNNC1	chr3:52485106-52488057	KO	Rescue	OK	16.4053	8.46068	-0.955315	-4.5367	5e-05	0.000584007	yes	4.5367
XLOC_001239	XLOC_001239	ADORA1	chr1:203096835-203136533	KO	Rescue	OK	1.4058	2.79071	0.989239	4.53419	5e-05	0.000584007	yes	4.53419
XLOC_011265	XLOC_011265	MILR1	chr17:62461568-62464760	KO	Rescue	OK	3.36223	0.874042	-1.94364	-4.52703	5e-05	0.000584007	yes	4.52703
XLOC_009599	XLOC_009599	KREMEN2	chr16:3013932-3018384	KO	Rescue	OK	2.65303	5.06084	0.931737	4.522	5e-05	0.000584007	yes	4.522
XLOC_026792	XLOC_026792	SDR16C5	chr8:57212569-57233241	KO	Rescue	OK	5.1901	2.88232	-0.848532	-4.52139	5e-05	0.000584007	yes	4.52139
XLOC_015864	XLOC_015864	REEP1	chr2:86441119-86565206	KO	Rescue	OK	4.8144	2.7212	-0.823115	-4.51251	5e-05	0.000584007	yes	4.51251
XLOC_015092	XLOC_015092	MYO7B	chr2:128293377-128395303	KO	Rescue	OK	0.482813	0.131866	-1.8724	-4.50838	5e-05	0.000584007	yes	4.50838
XLOC_003167	XLOC_003167	FAM213A	chr10:82167584-82193553	KO	Rescue	OK	5.59252	2.88616	-0.954348	-4.50152	5e-05	0.000584007	yes	4.50152
XLOC_024890	XLOC_024890	EEPD1	chr7:36192835-36341152	KO	Rescue	OK	0.282173	0.0594747	-2.24623	-4.49019	5e-05	0.000584007	yes	4.49019
XLOC_014686	XLOC_014686	MAPRE3	chr2:27193516-27250087	KO	Rescue	OK	2.47869	1.09966	-1.17251	-4.4874	5e-05	0.000584007	yes	4.4874
XLOC_028915	XLOC_028915	AVPR2	chrX:153167167-153172620	KO	Rescue	OK	1.01457	0.224938	-2.17327	-4.46287	5e-05	0.000584007	yes	4.46287
XLOC_028658	XLOC_028658	SLC16A2	chrX:73641265-73753764	KO	Rescue	OK	0.924142	0.0129863	-6.15305	-4.46018	0.0037	0.0234022	yes	4.46018
XLOC_014344	XLOC_014344	MEIS3	chr19:47906374-47922789	KO	Rescue	OK	6.78177	3.74426	-0.85698	-4.45252	5e-05	0.000584007	yes	4.45252
XLOC_020608	XLOC_020608	PPM1K	chr4:89178760-89205983	KO	Rescue	OK	1.51071	0.800491	-0.916271	-4.45226	5e-05	0.000584007	yes	4.45226
XLOC_009336	XLOC_009336	CELF6	chr15:72577067-72613029	KO	Rescue	OK	0.521992	0.135399	-1.94681	-4.45156	5e-05	0.000584007	yes	4.45156
XLOC_011126	XLOC_011126	MAPT	chr17:43920721-44105699	KO	Rescue	OK	0.316669	0.079753	-1.98936	-4.43654	5e-05	0.000584007	yes	4.43654
XLOC_005811	XLOC_005811	PLEKHA5	chr12:19282586-19529333	KO	Rescue	OK	1.82498	3.31774	0.862316	4.43413	5e-05	0.000584007	yes	4.43413
XLOC_018599	XLOC_018599	PTPRG	chr3:61547242-62304622	KO	Rescue	OK	0.20319	0.0477802	-2.08835	-4.42807	5e-05	0.000584007	yes	4.42807
XLOC_008166	XLOC_008166	SLC7A8	chr14:23594503-23652869	KO	Rescue	OK	0.757217	0.267919	-1.49891	-4.42071	5e-05	0.000584007	yes	4.42071
XLOC_012954	XLOC_012954	JUNB	chr19:12902309-12904125	KO	Rescue	OK	32.9736	20.1236	-0.712428	-4.4144	5e-05	0.000584007	yes	4.4144
XLOC_022563	XLOC_022563	RIMS1	chr6:72596405-73112849	KO	Rescue	OK	6.33659	12.9387	1.02991	4.39005	5e-05	0.000584007	yes	4.39005
XLOC_017550	XLOC_017550	-	chr21:44232375-44237051	KO	Rescue	OK	0.92014	0.290979	-1.66094	-4.38545	5e-05	0.000584007	yes	4.38545
XLOC_015377	XLOC_015377	-	chr2:217398658-217447067	KO	Rescue	OK	0.423628	0.0983237	-2.10719	-4.38417	5e-05	0.000584007	yes	4.38417
XLOC_009387	XLOC_009387	TSPAN3	chr15:77336359-77363570	KO	Rescue	OK	57.1512	35.7258	-0.677818	-4.38146	5e-05	0.000584007	yes	4.38146
XLOC_018220	XLOC_018220	-	chr22:42760419-42765301	KO	Rescue	OK	10.9746	5.55562	-0.982145	-4.37978	5e-05	0.000584007	yes	4.37978
XLOC_023566	XLOC_023566	-	chr6:166188123-166209601	KO	Rescue	OK	0.809277	1.36763	0.756977	4.37694	5e-05	0.000584007	yes	4.37694
XLOC_002950	XLOC_002950	OTUD1	chr10:23728197-23731310	KO	Rescue	OK	1.80349	0.866225	-1.05797	-4.3768	5e-05	0.000584007	yes	4.3768
XLOC_008377	XLOC_008377	-	chr14:74289277-74296814	KO	Rescue	OK	1.46533	0.371198	-1.98097	-4.36801	5e-05	0.000584007	yes	4.36801
XLOC_001837	XLOC_001837	RIMS3	chr1:41086351-41131329	KO	Rescue	OK	0.473446	0.201276	-1.23402	-4.36642	5e-05	0.000584007	yes	4.36642
XLOC_005788	XLOC_005788	GPRC5A,MIR614	chr12:13043602-13071080	KO	Rescue	OK	56.8686	33.5411	-0.761703	-4.36505	5e-05	0.000584007	yes	4.36505
XLOC_011356	XLOC_011356	TNRC6C	chr17:76000317-76107880	KO	Rescue	OK	0.453792	0.193555	-1.22928	-4.35989	5e-05	0.000584007	yes	4.35989
XLOC_023092	XLOC_023092	TNXB	chr6:32006092-32077151	KO	Rescue	OK	0.208151	0.0238413	-3.1261	-4.35563	5e-05	0.000584007	yes	4.35563
XLOC_019579	XLOC_019579	PLOD2	chr3:145787227-145881507	KO	Rescue	OK	148.986	93.119	-0.678026	-4.34595	5e-05	0.000584007	yes	4.34595
XLOC_006613	XLOC_006613	RND1	chr12:49250915-49259653	KO	Rescue	OK	1.99248	0.816091	-1.28776	-4.34515	5e-05	0.000584007	yes	4.34515
XLOC_026472	XLOC_026472	FAM83A	chr8:124194447-124222318	KO	Rescue	OK	7.90539	4.64239	-0.76797	-4.34269	5e-05	0.000584007	yes	4.34269
XLOC_002937	XLOC_002937	CACNB2	chr10:18429605-18944083	KO	Rescue	OK	10.5943	17.6576	0.736994	4.32938	5e-05	0.000584007	yes	4.32938
XLOC_024873	XLOC_024873	FAM188B,INMT,INMT-FAM188B	chr7:30791750-30932002	KO	Rescue	OK	3.53713	1.73099	-1.03098	-4.32878	5e-05	0.000584007	yes	4.32878
XLOC_004587	XLOC_004587	DGAT2	chr11:75479777-75512581	KO	Rescue	OK	4.00862	2.15576	-0.894908	-4.32775	5e-05	0.000584007	yes	4.32775
XLOC_021509	XLOC_021509	BRD9	chr5:863849-892939	KO	Rescue	OK	24.1896	38.8218	0.682479	4.32648	5e-05	0.000584007	yes	4.32648
XLOC_010289	XLOC_010289	LOC100190986	chr16:21443344-21445776	KO	Rescue	OK	1.90252	3.61958	0.927913	4.32618	5e-05	0.000584007	yes	4.32618
XLOC_016346	XLOC_016346	COL4A4	chr2:227867273-228179508	KO	Rescue	OK	3.16473	1.66497	-0.926588	-4.32366	5e-05	0.000584007	yes	4.32366
XLOC_022368	XLOC_022368	HSPA1A	chr6:31783290-31785719	KO	Rescue	OK	31.2658	49.9867	0.676957	4.32072	5e-05	0.000584007	yes	4.32072
XLOC_020656	XLOC_020656	AGXT2L1	chr4:109663201-109684235	KO	Rescue	OK	2.46038	4.60539	0.904444	4.31276	5e-05	0.000584007	yes	4.31276
XLOC_021513	XLOC_021513	TERT	chr5:1253286-1295162	KO	Rescue	OK	0.337227	0.893206	1.40527	4.31228	5e-05	0.000584007	yes	4.31228
XLOC_026147	XLOC_026147	LPL	chr8:19796581-19824770	KO	Rescue	OK	30.3776	19.0028	-0.676798	-4.31227	5e-05	0.000584007	yes	4.31227
XLOC_028233	XLOC_028233	PTGES	chr9:132500614-132515344	KO	Rescue	OK	28.6715	17.6236	-0.702108	-4.31066	5e-05	0.000584007	yes	4.31066
XLOC_004218	XLOC_004218	TRIM44	chr11:35683967-35839619	KO	Rescue	OK	30.4706	50.8666	0.739303	4.30797	5e-05	0.000584007	yes	4.30797
XLOC_002366	XLOC_002366	MUC1	chr1:155158299-155163173	KO	Rescue	OK	9.58163	5.46699	-0.809524	-4.30139	5e-05	0.000584007	yes	4.30139
XLOC_022224	XLOC_022224	LINC00340	chr6:21666674-22214574	KO	Rescue	OK	7.44867	0.830599	-3.16476	-4.29861	5e-05	0.000584007	yes	4.29861
XLOC_009890	XLOC_009890	GPR56	chr16:57653616-57698944	KO	Rescue	OK	12.8958	7.91277	-0.704646	-4.2938	5e-05	0.000584007	yes	4.2938
XLOC_012218	XLOC_012218	-	chr17:77727123-77744322	KO	Rescue	OK	3.88739	6.45336	0.731249	4.28727	5e-05	0.000584007	yes	4.28727
XLOC_000940	XLOC_000940	S100A9	chr1:153330329-153333503	KO	Rescue	OK	2.48788	0.26246	-3.24475	-4.28541	5e-05	0.000584007	yes	4.28541
XLOC_007500	XLOC_007500	DACH1	chr13:72012097-72441330	KO	Rescue	OK	0.233375	0.0322556	-2.85503	-4.28541	5e-05	0.000584007	yes	4.28541
XLOC_018643	XLOC_018643	-	chr3:93848621-93851081	KO	Rescue	OK	0.614427	1.43131	1.22002	4.28276	5e-05	0.000584007	yes	4.28276
XLOC_022895	XLOC_022895	-	chr6:3904346-3908681	KO	Rescue	OK	0.305961	0.0738909	-2.04988	-4.27417	5e-05	0.000584007	yes	4.27417
XLOC_004314	XLOC_004314	SERPING1	chr11:57365026-57382326	KO	Rescue	OK	3.89075	1.99268	-0.96534	-4.27025	5e-05	0.000584007	yes	4.27025
XLOC_027102	XLOC_027102	-	chr8:144968061-144971648	KO	Rescue	OK	0.451303	0.0145694	-4.95309	-4.26506	0.00265	0.0180043	yes	4.26506
XLOC_008962	XLOC_008962	LINC00052	chr15:88120159-88122917	KO	Rescue	OK	40.5019	25.2051	-0.684274	-4.26302	5e-05	0.000584007	yes	4.26302
XLOC_013769	XLOC_013769	MATK	chr19:3777966-3801810	KO	Rescue	OK	21.7388	34.8524	0.680989	4.263	5e-05	0.000584007	yes	4.263
XLOC_029154	XLOC_029154	AMER1	chrX:63404995-63425624	KO	Rescue	OK	2.76935	4.50557	0.702161	4.25419	5e-05	0.000584007	yes	4.25419
XLOC_024826	XLOC_024826	IL6	chr7:22766765-22771621	KO	Rescue	OK	0.937507	0.05618	-4.0607	-4.24851	0.00265	0.0180043	yes	4.24851
XLOC_000649	XLOC_000649	MIR548AA1,PALMD	chr1:100111157-100232184	KO	Rescue	OK	18.1475	10.0238	-0.856333	-4.24144	5e-05	0.000584007	yes	4.24144
XLOC_006701	XLOC_006701	NFE2	chr12:54685890-54694821	KO	Rescue	OK	1.84152	0.75104	-1.29393	-4.23892	5e-05	0.000584007	yes	4.23892
XLOC_009565	XLOC_009565	SNHG9	chr16:2014996-2015505	KO	Rescue	OK	78.6529	39.9729	-0.97648	-4.23381	5e-05	0.000584007	yes	4.23381
XLOC_023485	XLOC_023485	-	chr6:141167095-141219599	KO	Rescue	OK	1.21543	3.85564	1.6655	4.2208	5e-05	0.000584007	yes	4.2208
XLOC_005200	XLOC_005200	SYT7	chr11:61281187-61348664	KO	Rescue	OK	4.0795	1.6793	-1.28053	-4.21808	5e-05	0.000584007	yes	4.21808
XLOC_015800	XLOC_015800	PAIP2B	chr2:71409867-71454233	KO	Rescue	OK	0.680846	0.321716	-1.08154	-4.21802	5e-05	0.000584007	yes	4.21802
XLOC_003482	XLOC_003482	SFMBT2	chr10:7200585-7453448	KO	Rescue	OK	6.06815	9.63288	0.66671	4.20157	5e-05	0.000584007	yes	4.20157
XLOC_011675	XLOC_011675	ALDOC	chr17:26900132-26903951	KO	Rescue	OK	13.8794	8.27471	-0.746161	-4.19978	5e-05	0.000584007	yes	4.19978
XLOC_021971	XLOC_021971	CSF1R	chr5:149432728-149493042	KO	Rescue	OK	1.61647	0.835657	-0.951868	-4.19729	5e-05	0.000584007	yes	4.19729
XLOC_014245	XLOC_014245	CNFN	chr19:42891170-42894444	KO	Rescue	OK	6.48596	2.50693	-1.3714	-4.19563	5e-05	0.000584007	yes	4.19563
XLOC_007346	XLOC_007346	XPO4	chr13:21351467-21477162	KO	Rescue	OK	6.34264	10.0343	0.661779	4.19348	5e-05	0.000584007	yes	4.19348
XLOC_005054	XLOC_005054	BDNF	chr11:27528398-27743605	KO	Rescue	OK	1.30412	2.39366	0.876142	4.1902	5e-05	0.000584007	yes	4.1902
XLOC_007570	XLOC_007570	NALCN	chr13:101360578-102069562	KO	Rescue	OK	1.7444	0.63824	-1.45056	-4.18432	5e-05	0.000584007	yes	4.18432
XLOC_002304	XLOC_002304	RORC	chr1:151778546-151804348	KO	Rescue	OK	2.41509	1.09956	-1.13515	-4.1826	5e-05	0.000584007	yes	4.1826
XLOC_021340	XLOC_021340	ARHGEF37	chr5:148960923-149014527	KO	Rescue	OK	0.548198	0.223992	-1.29125	-4.18076	5e-05	0.000584007	yes	4.18076
XLOC_025762	XLOC_025762	SAMD9	chr7:92728825-92747336	KO	Rescue	OK	0.973944	0.506484	-0.943321	-4.17308	5e-05	0.000584007	yes	4.17308
XLOC_001745	XLOC_001745	SDC3	chr1:31342312-31381480	KO	Rescue	OK	8.55175	5.32513	-0.683403	-4.16821	5e-05	0.000584007	yes	4.16821
XLOC_015656	XLOC_015656	LOC100288911	chr2:36581891-36582713	KO	Rescue	OK	6.48475	2.93455	-1.14391	-4.16714	5e-05	0.000584007	yes	4.16714
XLOC_021348	XLOC_021348	SYNPO	chr5:149980641-150038792	KO	Rescue	OK	8.50354	5.29929	-0.682266	-4.16605	5e-05	0.000584007	yes	4.16605
XLOC_022405	XLOC_022405	ITPR3	chr6:33589072-33664348	KO	Rescue	OK	14.3384	22.4568	0.647263	4.16381	5e-05	0.000584007	yes	4.16381
XLOC_027978	XLOC_027978	TLE1	chr9:84198597-84304567	KO	Rescue	OK	2.56811	1.30891	-0.972343	-4.15296	5e-05	0.000584007	yes	4.15296
XLOC_016383	XLOC_016383	ARL4C	chr2:235401685-235405693	KO	Rescue	OK	0.245848	0.0442511	-2.47398	-4.1473	5e-05	0.000584007	yes	4.1473
XLOC_016109	XLOC_016109	-	chr2:165504017-165522407	KO	Rescue	OK	0.162819	0.406624	1.32042	4.14397	5e-05	0.000584007	yes	4.14397
XLOC_000176	XLOC_000176	-	chr1:16509646-16511708	KO	Rescue	OK	0.46834	0.0730926	-2.67976	-4.14189	5e-05	0.000584007	yes	4.14189
XLOC_000059	XLOC_000059	PLCH2	chr1:2399004-2436964	KO	Rescue	OK	0.403155	0.142075	-1.50468	-4.13955	5e-05	0.000584007	yes	4.13955
XLOC_003651	XLOC_003651	SLC16A9	chr10:61410519-61469649	KO	Rescue	OK	2.48775	1.2598	-0.981645	-4.13212	5e-05	0.000584007	yes	4.13212
XLOC_021983	XLOC_021983	ZNF300	chr5:150273953-150284663	KO	Rescue	OK	1.89237	3.36259	0.829376	4.13068	5e-05	0.000584007	yes	4.13068
XLOC_014862	XLOC_014862	DYSF	chr2:71680752-71913893	KO	Rescue	OK	1.28494	0.705623	-0.86473	-4.13039	5e-05	0.000584007	yes	4.13039
XLOC_027103	XLOC_027103	-	chr8:144972593-144978349	KO	Rescue	OK	0.877446	0.145565	-2.59164	-4.12002	5e-05	0.000584007	yes	4.12002
XLOC_019485	XLOC_019485	HEG1	chr3:124684391-124775121	KO	Rescue	OK	10.6705	6.82241	-0.645274	-4.11296	5e-05	0.000584007	yes	4.11296
XLOC_022672	XLOC_022672	RSPH4A,RWDD1	chr6:116892340-116954148	KO	Rescue	OK	38.5229	61.9675	0.685794	4.10816	5e-05	0.000584007	yes	4.10816
XLOC_013939	XLOC_013939	-	chr19:12794486-12795853	KO	Rescue	OK	0.075347	0.668979	3.15034	4.10678	5e-05	0.000584007	yes	4.10678
XLOC_005583	XLOC_005583	TRIM29	chr11:119981991-120008863	KO	Rescue	OK	57.7256	36.4354	-0.663869	-4.10411	5e-05	0.000584007	yes	4.10411
XLOC_022369	XLOC_022369	HSPA1B	chr6:31795511-31798031	KO	Rescue	OK	27.795	43.4263	0.643745	4.10062	5e-05	0.000584007	yes	4.10062
XLOC_003210	XLOC_003210	IFIT2	chr10:91061705-91069033	KO	Rescue	OK	3.80595	2.18677	-0.799452	-4.09834	5e-05	0.000584007	yes	4.09834
XLOC_017062	XLOC_017062	SDC4	chr20:43953928-43977064	KO	Rescue	OK	34.6989	22.1705	-0.646244	-4.09381	5e-05	0.000584007	yes	4.09381
XLOC_017022	XLOC_017022	-	chr20:36127784-36140646	KO	Rescue	OK	0.75222	0.380113	-0.984725	-4.08469	5e-05	0.000584007	yes	4.08469
XLOC_018090	XLOC_018090	LIF	chr22:30636435-30654011	KO	Rescue	OK	1.4521	0.760867	-0.932427	-4.07429	5e-05	0.000584007	yes	4.07429
XLOC_014719	XLOC_014719	CLIP4	chr2:29338307-29406679	KO	Rescue	OK	0.611567	1.25266	1.03441	4.07355	5e-05	0.000584007	yes	4.07355
XLOC_012465	XLOC_012465	TNFRSF11A	chr18:59992508-60055347	KO	Rescue	OK	1.60595	0.859577	-0.901729	-4.05834	5e-05	0.000584007	yes	4.05834
XLOC_005056	XLOC_005056	-	chr11:29320208-29357817	KO	Rescue	OK	3.25683	9.7069	1.57554	4.05834	5e-05	0.000584007	yes	4.05834
XLOC_008345	XLOC_008345	PLEK2	chr14:67853699-67878828	KO	Rescue	OK	4.74176	2.50336	-0.92156	-4.05393	5e-05	0.000584007	yes	4.05393
XLOC_000497	XLOC_000497	ACOT11	chr1:55007752-55100417	KO	Rescue	OK	0.110832	0.564779	2.34932	4.04613	5e-05	0.000584007	yes	4.04613
XLOC_016019	XLOC_016019	LIMS2	chr2:128395995-128439360	KO	Rescue	OK	3.0719	1.56078	-0.97687	-4.04487	5e-05	0.000584007	yes	4.04487
XLOC_000717	XLOC_000717	SLC6A17	chr1:110693125-110744825	KO	Rescue	OK	0.724388	0.358704	-1.01397	-4.04335	5e-05	0.000584007	yes	4.04335
XLOC_011204	XLOC_011204	NOG	chr17:54671059-54672951	KO	Rescue	OK	7.61837	12.4776	0.711789	4.04186	5e-05	0.000584007	yes	4.04186
XLOC_003734	XLOC_003734	ZCCHC24	chr10:81142082-81205383	KO	Rescue	OK	5.08004	3.12502	-0.700974	-4.03943	5e-05	0.000584007	yes	4.03943
XLOC_026833	XLOC_026833	LACTB2	chr8:71520811-71581547	KO	Rescue	OK	16.4671	10.0891	-0.706792	-4.03775	5e-05	0.000584007	yes	4.03775
XLOC_017951	XLOC_017951	ADM2	chr22:50919984-50924866	KO	Rescue	OK	1.24727	2.22578	0.835541	4.03289	5e-05	0.000584007	yes	4.03289
XLOC_008839	XLOC_008839	GLCE	chr15:69116302-69564544	KO	Rescue	OK	8.37309	5.28349	-0.664267	-4.02656	5e-05	0.000584007	yes	4.02656
XLOC_017039	XLOC_017039	MAFB	chr20:39314516-39317876	KO	Rescue	OK	0.284165	0.052265	-2.44281	-4.02419	5e-05	0.000584007	yes	4.02419
XLOC_025979	XLOC_025979	JHDM1D	chr7:139784545-139876741	KO	Rescue	OK	0.718041	0.384928	-0.899475	-4.01742	5e-05	0.000584007	yes	4.01742
XLOC_006653	XLOC_006653	KRT80	chr12:52562779-52585784	KO	Rescue	OK	25.7497	16.6343	-0.630398	-4.00675	5e-05	0.000584007	yes	4.00675
XLOC_014087	XLOC_014087	ANKRD27	chr19:33087906-33166103	KO	Rescue	OK	8.35121	13.019	0.640559	3.99651	5e-05	0.000584007	yes	3.99651
XLOC_026492	XLOC_026492	SQLE	chr8:126010719-126034525	KO	Rescue	OK	39.9043	25.8659	-0.625492	-3.99273	5e-05	0.000584007	yes	3.99273
XLOC_011784	XLOC_011784	MED24	chr17:38175347-38210980	KO	Rescue	OK	19.8586	30.6087	0.624181	3.98477	5e-05	0.000584007	yes	3.98477
XLOC_006397	XLOC_006397	ANO2	chr12:5669864-6055398	KO	Rescue	OK	2.48233	1.28856	-0.945932	-3.9844	5e-05	0.000584007	yes	3.9844
XLOC_029089	XLOC_029089	KCND1	chrX:48818638-48828251	KO	Rescue	OK	0.68895	0.314018	-1.13355	-3.97999	5e-05	0.000584007	yes	3.97999
XLOC_028311	XLOC_028311	CLIC3	chr9:139889059-139891024	KO	Rescue	OK	3.10785	1.18817	-1.38718	-3.97563	5e-05	0.000584007	yes	3.97563
XLOC_012969	XLOC_012969	ZSWIM4	chr19:13906223-13943044	KO	Rescue	OK	7.41431	4.67534	-0.665243	-3.97268	5e-05	0.000584007	yes	3.97268
XLOC_001719	XLOC_001719	FAM46B	chr1:27331510-27339333	KO	Rescue	OK	9.85111	6.07127	-0.698287	-3.97204	5e-05	0.000584007	yes	3.97204
XLOC_010462	XLOC_010462	CNOT1	chr16:58549382-58663795	KO	Rescue	OK	45.7411	71.9973	0.654452	3.97022	5e-05	0.000584007	yes	3.97022
XLOC_012557	XLOC_012557	LAMA1	chr18:6939006-7117813	KO	Rescue	OK	94.2153	147.532	0.646994	3.96868	5e-05	0.000584007	yes	3.96868
XLOC_004525	XLOC_004525	GAL	chr11:68451982-68458643	KO	Rescue	OK	38.7392	61.0561	0.656341	3.96766	5e-05	0.000584007	yes	3.96766
XLOC_026716	XLOC_026716	DUSP4	chr8:29190578-29208267	KO	Rescue	OK	6.3296	3.99666	-0.663319	-3.96525	5e-05	0.000584007	yes	3.96525
XLOC_011005	XLOC_011005	MLLT6	chr17:36861872-36886056	KO	Rescue	OK	17.3882	26.6059	0.613639	3.96522	5e-05	0.000584007	yes	3.96522
XLOC_017443	XLOC_017443	ADAMTS1	chr21:28208605-28217728	KO	Rescue	OK	1.6989	2.96302	0.802473	3.95891	5e-05	0.000584007	yes	3.95891
XLOC_003394	XLOC_003394	HTRA1	chr10:124221040-124274424	KO	Rescue	OK	28.6568	18.4528	-0.635038	-3.95448	5e-05	0.000584007	yes	3.95448
XLOC_006272	XLOC_006272	RNFT2	chr12:117176095-117291436	KO	Rescue	OK	1.20913	2.53644	1.06884	3.95037	5e-05	0.000584007	yes	3.95037
XLOC_021384	XLOC_021384	GABRA1	chr5:161274196-161326965	KO	Rescue	OK	0.0236437	0.316875	3.74438	3.94299	5e-05	0.000584007	yes	3.94299
XLOC_026878	XLOC_026878	-	chr8:88553243-88579277	KO	Rescue	OK	2.24401	0.278253	-3.01161	-3.94293	5e-05	0.000584007	yes	3.94293
XLOC_015924	XLOC_015924	KIAA1211L	chr2:99410308-99552684	KO	Rescue	OK	0.950847	0.450727	-1.07696	-3.94128	5e-05	0.000584007	yes	3.94128
XLOC_026640	XLOC_026640	CTSB	chr8:11660075-11725646	KO	Rescue	OK	66.5119	38.0572	-0.805443	-3.93019	5e-05	0.000584007	yes	3.93019
XLOC_019504	XLOC_019504	MGLL	chr3:127407904-127542296	KO	Rescue	OK	17.6433	11.4248	-0.626947	-3.92268	5e-05	0.000584007	yes	3.92268
XLOC_005832	XLOC_005832	-	chr12:20843461-20847704	KO	Rescue	OK	0.127566	0.377748	1.56618	3.92191	5e-05	0.000584007	yes	3.92191
XLOC_017650	XLOC_017650	TANGO2	chr22:20008622-20055476	KO	Rescue	OK	9.71292	5.9192	-0.714503	-3.9183	5e-05	0.000584007	yes	3.9183
XLOC_003188	XLOC_003188	ADIRF,AGAP11	chr10:88725117-88769960	KO	Rescue	OK	14.5487	4.91703	-1.56503	-3.91414	5e-05	0.000584007	yes	3.91414
XLOC_025948	XLOC_025948	PODXL	chr7:131185020-131241376	KO	Rescue	OK	27.9747	42.4844	0.602814	3.91269	5e-05	0.000584007	yes	3.91269
XLOC_014851	XLOC_014851	MXD1	chr2:70142172-70170076	KO	Rescue	OK	2.81446	1.70965	-0.71916	-3.9106	5e-05	0.000584007	yes	3.9106
XLOC_014505	XLOC_014505	LILRA6	chr19:54720146-54746724	KO	Rescue	OK	0.631871	0.127285	-2.31157	-3.90675	5e-05	0.000584007	yes	3.90675
XLOC_008858	XLOC_008858	NEO1	chr15:73344824-73597547	KO	Rescue	OK	0.308842	0.120301	-1.36023	-3.90244	5e-05	0.000584007	yes	3.90244
XLOC_003878	XLOC_003878	SH3PXD2A	chr10:105253734-105615164	KO	Rescue	OK	33.6646	21.7004	-0.633512	-3.8981	5e-05	0.000584007	yes	3.8981
XLOC_008740	XLOC_008740	SQRDL	chr15:45923345-45983492	KO	Rescue	OK	8.30238	5.00778	-0.729353	-3.89483	5e-05	0.000584007	yes	3.89483
XLOC_017060	XLOC_017060	SLPI	chr20:43880878-43883206	KO	Rescue	OK	83.1482	53.1461	-0.645723	-3.89277	5e-05	0.000584007	yes	3.89277
XLOC_027601	XLOC_027601	LAMC3	chr9:133884359-133968446	KO	Rescue	OK	5.12034	8.01922	0.647221	3.8835	5e-05	0.000584007	yes	3.8835
XLOC_000337	XLOC_000337	GJB5	chr1:35220647-35224113	KO	Rescue	OK	0.774713	0.163166	-2.24732	-3.87979	5e-05	0.000584007	yes	3.87979
XLOC_007503	XLOC_007503	KLF12	chr13:74260009-74708621	KO	Rescue	OK	1.26481	2.02421	0.678438	3.87705	5e-05	0.000584007	yes	3.87705
XLOC_014826	XLOC_014826	OTX1	chr2:63277191-63284966	KO	Rescue	OK	3.00693	5.00646	0.735502	3.86857	5e-05	0.000584007	yes	3.86857
XLOC_023086	XLOC_023086	ZBTB12	chr6:31865561-31913449	KO	Rescue	OK	6.75455	11.1216	0.719429	3.86625	5e-05	0.000584007	yes	3.86625
XLOC_009415	XLOC_009415	MEX3B	chr15:82334118-82338484	KO	Rescue	OK	3.87475	2.32294	-0.738152	-3.86576	5e-05	0.000584007	yes	3.86576
XLOC_002909	XLOC_002909	OPTN	chr10:13142079-13180342	KO	Rescue	OK	6.10463	3.79234	-0.686814	-3.86414	5e-05	0.000584007	yes	3.86414
XLOC_025150	XLOC_025150	PCOLCE	chr7:100183955-100205798	KO	Rescue	OK	12.4448	19.624	0.657079	3.86143	5e-05	0.000584007	yes	3.86143
XLOC_022644	XLOC_022644	FIG4	chr6:110012423-110147709	KO	Rescue	OK	4.81948	2.90557	-0.730056	-3.86012	5e-05	0.000584007	yes	3.86012
XLOC_000285	XLOC_000285	SESN2	chr1:28585962-28609002	KO	Rescue	OK	3.33735	5.40303	0.695065	3.85462	5e-05	0.000584007	yes	3.85462
XLOC_022537	XLOC_022537	FAM83B	chr6:54711568-54809897	KO	Rescue	OK	0.00799622	0.201406	4.65465	3.85289	0.0026	0.0177727	yes	3.85289
XLOC_021935	XLOC_021935	PCDH1	chr5:141232672-141257944	KO	Rescue	OK	0.544263	0.216285	-1.33137	-3.85184	5e-05	0.000584007	yes	3.85184
XLOC_009006	XLOC_009006	SV2B	chr15:91643181-91844539	KO	Rescue	OK	0.142416	0.312317	1.1329	3.84303	5e-05	0.000584007	yes	3.84303
XLOC_006685	XLOC_006685	RARG	chr12:53604338-53626374	KO	Rescue	OK	14.7678	22.6371	0.616235	3.83959	5e-05	0.000584007	yes	3.83959
XLOC_009706	XLOC_009706	TMEM159	chr16:20944475-21192168	KO	Rescue	OK	4.37102	2.45853	-0.830172	-3.83747	5e-05	0.000584007	yes	3.83747
XLOC_027499	XLOC_027499	PTGS1	chr9:125132808-125157982	KO	Rescue	OK	0.568101	0.248464	-1.19311	-3.83413	5e-05	0.000584007	yes	3.83413
XLOC_002983	XLOC_002983	-	chr10:38354668-38357037	KO	Rescue	OK	0.412373	0.987715	1.26014	3.82792	5e-05	0.000584007	yes	3.82792
XLOC_008826	XLOC_008826	SMAD3	chr15:67357478-67487570	KO	Rescue	OK	20.4717	13.4396	-0.607144	-3.82679	5e-05	0.000584007	yes	3.82679
XLOC_005532	XLOC_005532	IL18	chr11:112013973-112034840	KO	Rescue	OK	75.1065	49.2412	-0.609073	-3.82652	5e-05	0.000584007	yes	3.82652
XLOC_020006	XLOC_020006	KIAA1211	chr4:56915184-57196890	KO	Rescue	OK	1.66411	2.68341	0.689315	3.8219	5e-05	0.000584007	yes	3.8219
XLOC_013185	XLOC_013185	ZNF568	chr19:37407230-37488834	KO	Rescue	OK	0.0465067	0.318853	2.77738	3.8207	5e-05	0.000584007	yes	3.8207
XLOC_016085	XLOC_016085	RPRM	chr2:154333851-154335322	KO	Rescue	OK	0.14413	0.665505	2.20708	3.81947	5e-05	0.000584007	yes	3.81947
XLOC_001752	XLOC_001752	FABP3	chr1:31769822-31845923	KO	Rescue	OK	12.4552	2.23193	-2.48039	-3.81871	5e-05	0.000584007	yes	3.81871
XLOC_028777	XLOC_028777	PGRMC1	chrX:118370210-118378429	KO	Rescue	OK	128.606	85.4143	-0.590404	-3.81716	5e-05	0.000584007	yes	3.81716
XLOC_006347	XLOC_006347	GPR133	chr12:131426467-131626013	KO	Rescue	OK	0.979828	2.03238	1.05257	3.8171	5e-05	0.000584007	yes	3.8171
XLOC_001038	XLOC_001038	SLAMF7	chr1:160709076-160724601	KO	Rescue	OK	0.297937	0.0504764	-2.56133	-3.81652	5e-05	0.000584007	yes	3.81652
XLOC_024932	XLOC_024932	-	chr7:47636426-47640146	KO	Rescue	OK	1.5805	0.339656	-2.21824	-3.81495	5e-05	0.000584007	yes	3.81495
XLOC_004892	XLOC_004892	ZNF195	chr11:3379026-3400452	KO	Rescue	OK	5.17208	9.07423	0.811031	3.80682	5e-05	0.000584007	yes	3.80682
XLOC_006044	XLOC_006044	INHBE	chr12:57849095-57851791	KO	Rescue	OK	0.635163	1.34822	1.08586	3.80386	5e-05	0.000584007	yes	3.80386
XLOC_008789	XLOC_008789	FOXB1	chr15:60291562-60299692	KO	Rescue	OK	0.330782	0.838411	1.34178	3.80181	5e-05	0.000584007	yes	3.80181
XLOC_013182	XLOC_013182	ZNF567	chr19:37178555-37214126	KO	Rescue	OK	1.04971	2.10175	1.0016	3.80161	5e-05	0.000584007	yes	3.80161
XLOC_020166	XLOC_020166	ALPK1	chr4:113218498-113363764	KO	Rescue	OK	0.252457	0.0736371	-1.77754	-3.80143	5e-05	0.000584007	yes	3.80143
XLOC_014665	XLOC_014665	KLHL29	chr2:23607677-23931483	KO	Rescue	OK	5.79047	3.70283	-0.645052	-3.7944	5e-05	0.000584007	yes	3.7944
XLOC_022935	XLOC_022935	NEDD9	chr6:11183502-11382581	KO	Rescue	OK	30.3078	19.2355	-0.655922	-3.79274	5e-05	0.000584007	yes	3.79274
XLOC_005297	XLOC_005297	SLC29A2	chr11:66129988-66139949	KO	Rescue	OK	13.9226	21.3678	0.61801	3.79097	5e-05	0.000584007	yes	3.79097
XLOC_017312	XLOC_017312	PDE9A	chr21:44073704-44195786	KO	Rescue	OK	3.22873	1.66517	-0.9553	-3.79085	5e-05	0.000584007	yes	3.79085
XLOC_002440	XLOC_002440	IGSF9	chr1:159896769-159915802	KO	Rescue	OK	1.39511	0.756408	-0.883139	-3.78535	5e-05	0.000584007	yes	3.78535
XLOC_021735	XLOC_021735	ZBED3	chr5:76369270-76444340	KO	Rescue	OK	7.37601	11.2685	0.611384	3.78364	5e-05	0.000584007	yes	3.78364
XLOC_004116	XLOC_004116	SWAP70	chr11:9685627-9774507	KO	Rescue	OK	12.3664	18.6774	0.594867	3.77973	5e-05	0.000584007	yes	3.77973
XLOC_021589	XLOC_021589	ADAMTS12	chr5:33523649-33892663	KO	Rescue	OK	4.52163	1.98029	-1.19113	-3.77886	5e-05	0.000584007	yes	3.77886
XLOC_020918	XLOC_020918	FAM105A	chr5:14581890-14616287	KO	Rescue	OK	0.28699	0.569956	0.98985	3.77833	5e-05	0.000584007	yes	3.77833
XLOC_006906	XLOC_006906	ALDH1L2	chr12:105413561-105478351	KO	Rescue	OK	2.87265	4.47748	0.640303	3.77746	5e-05	0.000584007	yes	3.77746
XLOC_004217	XLOC_004217	FJX1	chr11:35639734-35642421	KO	Rescue	OK	2.00934	3.45723	0.782893	3.77744	5e-05	0.000584007	yes	3.77744
XLOC_008691	XLOC_008691	CHAC1	chr15:41245635-41248717	KO	Rescue	OK	1.81401	3.43369	0.920582	3.77494	5e-05	0.000584007	yes	3.77494
XLOC_010641	XLOC_010641	MVD	chr16:88718345-88729553	KO	Rescue	OK	25.3712	16.4269	-0.627134	-3.77367	5e-05	0.000584007	yes	3.77367
XLOC_026525	XLOC_026525	PSCA	chr8:143751725-143764145	KO	Rescue	OK	2.66972	0.639309	-2.0621	-3.77337	5e-05	0.000584007	yes	3.77337
XLOC_016614	XLOC_016614	ACSS2	chr20:33462765-33515769	KO	Rescue	OK	8.85068	5.63734	-0.650773	-3.77141	5e-05	0.000584007	yes	3.77141
XLOC_006108	XLOC_006108	-	chr12:72188621-72194575	KO	Rescue	OK	0.504438	0.234395	-1.10573	-3.76771	5e-05	0.000584007	yes	3.76771
XLOC_019013	XLOC_019013	IL1RAP	chr3:190231839-190374986	KO	Rescue	OK	17.0055	26.9286	0.663139	3.76657	5e-05	0.000584007	yes	3.76657
XLOC_004652	XLOC_004652	FUT4	chr11:94277016-94283064	KO	Rescue	OK	0.312471	0.123369	-1.34074	-3.76622	5e-05	0.000584007	yes	3.76622
XLOC_028631	XLOC_028631	DLG3	chrX:69664704-69725339	KO	Rescue	OK	4.0624	6.35529	0.645624	3.76357	5e-05	0.000584007	yes	3.76357
XLOC_020909	XLOC_020909	ANKRD33B	chr5:10563434-10658001	KO	Rescue	OK	6.55765	4.32371	-0.600911	-3.76197	5e-05	0.000584007	yes	3.76197
XLOC_022696	XLOC_022696	NCOA7	chr6:126102008-126253176	KO	Rescue	OK	24.9718	16.3698	-0.609266	-3.76059	5e-05	0.000584007	yes	3.76059
XLOC_019648	XLOC_019648	MECOM	chr3:168801286-169381563	KO	Rescue	OK	3.2798	5.1653	0.655244	3.75308	5e-05	0.000584007	yes	3.75308
XLOC_025823	XLOC_025823	TFR2	chr7:100218038-100239173	KO	Rescue	OK	0.57205	1.23795	1.11374	3.74799	5e-05	0.000584007	yes	3.74799
XLOC_023483	XLOC_023483	CITED2	chr6:139693391-139695787	KO	Rescue	OK	86.0836	57.4	-0.584688	-3.74749	5e-05	0.000584007	yes	3.74749
XLOC_006456	XLOC_006456	OLR1	chr12:10310898-10324790	KO	Rescue	OK	95.0845	63.5522	-0.581268	-3.74545	5e-05	0.000584007	yes	3.74545
XLOC_025883	XLOC_025883	DOCK4	chr7:111366010-111846486	KO	Rescue	OK	1.52991	0.927997	-0.721255	-3.74483	5e-05	0.000584007	yes	3.74483
XLOC_006459	XLOC_006459	KLRC2,KLRC3,KLRC4,KLRC4-KLRK1,KLRK1	chr12:10515607-10590352	KO	Rescue	OK	11.1442	3.07922	-1.85566	-3.74247	5e-05	0.000584007	yes	3.74247
XLOC_001925	XLOC_001925	LRP8	chr1:53692563-53793841	KO	Rescue	OK	6.8878	11.5577	0.746733	3.74052	5e-05	0.000584007	yes	3.74052
XLOC_011914	XLOC_011914	-	chr17:42299053-42300150	KO	Rescue	OK	4.428	1.16015	-1.93234	-3.74043	5e-05	0.000584007	yes	3.74043
XLOC_004598	XLOC_004598	CAPN5	chr11:76777991-76837198	KO	Rescue	OK	0.23986	0.06266	-1.93657	-3.7387	5e-05	0.000584007	yes	3.7387
XLOC_012436	XLOC_012436	MAPK4	chr18:48086483-48258196	KO	Rescue	OK	20.6508	13.7407	-0.587745	-3.73698	5e-05	0.000584007	yes	3.73698
XLOC_015432	XLOC_015432	COL4A3	chr2:227867273-228179508	KO	Rescue	OK	3.25663	1.32168	-1.30101	-3.73665	5e-05	0.000584007	yes	3.73665
XLOC_016314	XLOC_016314	CHPF	chr2:220403668-220408487	KO	Rescue	OK	23.8796	15.834	-0.592752	-3.7341	5e-05	0.000584007	yes	3.7341
XLOC_005458	XLOC_005458	CHORDC1	chr11:89933596-89956532	KO	Rescue	OK	30.9468	46.217	0.578637	3.72625	5e-05	0.000584007	yes	3.72625
XLOC_003198	XLOC_003198	PAPSS2	chr10:89417981-89507471	KO	Rescue	OK	65.5275	43.983	-0.575155	-3.72459	5e-05	0.000584007	yes	3.72459
XLOC_006703	XLOC_006703	ZNF385A	chr12:54762919-54785083	KO	Rescue	OK	9.01189	5.68573	-0.664485	-3.7208	5e-05	0.000584007	yes	3.7208
XLOC_017001	XLOC_017001	-	chr20:33811099-33813490	KO	Rescue	OK	0.438656	0.114867	-1.93312	-3.71805	5e-05	0.000584007	yes	3.71805
XLOC_000317	XLOC_000317	FAM167B	chr1:32712817-32714461	KO	Rescue	OK	1.49562	0.461225	-1.69721	-3.71228	5e-05	0.000584007	yes	3.71228
XLOC_008106	XLOC_008106	CRIP2	chr14:105939274-105946507	KO	Rescue	OK	56.0724	37.0928	-0.596151	-3.71083	5e-05	0.000584007	yes	3.71083
XLOC_002066	XLOC_002066	F3	chr1:94994731-95007413	KO	Rescue	OK	4.37966	7.03754	0.684253	3.70999	5e-05	0.000584007	yes	3.70999
XLOC_005633	XLOC_005633	ARHGAP32	chr11:128834954-129149479	KO	Rescue	OK	9.09044	5.58411	-0.703023	-3.70404	5e-05	0.000584007	yes	3.70404
XLOC_014431	XLOC_014431	-	chr19:51276385-51279728	KO	Rescue	OK	0.289356	0.069356	-2.06075	-3.7023	5e-05	0.000584007	yes	3.7023
XLOC_016391	XLOC_016391	HES6	chr2:239146907-239148685	KO	Rescue	OK	3.0541	1.55969	-0.969491	-3.68947	5e-05	0.000584007	yes	3.68947
XLOC_011148	XLOC_011148	TBKBP1	chr17:45771535-45789429	KO	Rescue	OK	0.284748	0.0614296	-2.21268	-3.68897	5e-05	0.000584007	yes	3.68897
XLOC_020452	XLOC_020452	ARAP2	chr4:36059738-36246397	KO	Rescue	OK	0.563351	0.98279	0.802849	3.68209	5e-05	0.000584007	yes	3.68209
XLOC_005654	XLOC_005654	LOC100292680	chr12:1609147-1617000	KO	Rescue	OK	3.69708	6.32975	0.775761	3.68008	5e-05	0.000584007	yes	3.68008
XLOC_015213	XLOC_015213	CYBRD1	chr2:172378756-172414643	KO	Rescue	OK	7.0761	4.61133	-0.617771	-3.67981	5e-05	0.000584007	yes	3.67981
XLOC_013310	XLOC_013310	RELB	chr19:45504616-45541484	KO	Rescue	OK	6.2823	3.87001	-0.698955	-3.6787	5e-05	0.000584007	yes	3.6787
XLOC_004506	XLOC_004506	RHOD	chr11:66824145-66839697	KO	Rescue	OK	25.4269	16.3893	-0.633602	-3.67737	5e-05	0.000584007	yes	3.67737
XLOC_023568	XLOC_023568	-	chr6:166215010-166222177	KO	Rescue	OK	0.274871	0.53758	0.967725	3.66597	5e-05	0.000584007	yes	3.66597
XLOC_014720	XLOC_014720	YPEL5	chr2:30369680-30383399	KO	Rescue	OK	7.36337	4.60262	-0.677909	-3.65375	5e-05	0.000584007	yes	3.65375
XLOC_015944	XLOC_015944	TGFBRAP1	chr2:105880843-105946690	KO	Rescue	OK	8.98267	13.8388	0.623502	3.65062	5e-05	0.000584007	yes	3.65062
XLOC_006790	XLOC_006790	CPM	chr12:69244955-69357020	KO	Rescue	OK	5.72906	3.76114	-0.607126	-3.64876	5e-05	0.000584007	yes	3.64876
XLOC_020179	XLOC_020179	SNHG8	chr4:119199916-119200978	KO	Rescue	OK	140.55	79.4527	-0.82292	-3.64097	5e-05	0.000584007	yes	3.64097
XLOC_009350	XLOC_009350	C15orf59	chr15:74032140-74045667	KO	Rescue	OK	1.24796	0.502926	-1.31116	-3.63542	5e-05	0.000584007	yes	3.63542
XLOC_013748	XLOC_013748	GNG7	chr19:2511217-2702746	KO	Rescue	OK	0.478753	0.201242	-1.25035	-3.63243	5e-05	0.000584007	yes	3.63243
XLOC_025724	XLOC_025724	SRCRB4D	chr7:76018645-76071388	KO	Rescue	OK	1.97055	0.694908	-1.5037	-3.6263	5e-05	0.000584007	yes	3.6263
XLOC_010921	XLOC_010921	ANKRD13B	chr17:27920013-27949925	KO	Rescue	OK	11.8231	18.2395	0.625458	3.62542	5e-05	0.000584007	yes	3.62542
XLOC_005365	XLOC_005365	PDE2A	chr11:72287183-72385497	KO	Rescue	OK	48.5825	71.8669	0.564891	3.62065	5e-05	0.000584007	yes	3.62065
XLOC_019578	XLOC_019578	-	chr3:145766205-145772320	KO	Rescue	OK	0.333107	0.141092	-1.23935	-3.6194	5e-05	0.000584007	yes	3.6194
XLOC_003313	XLOC_003313	NFKB2	chr10:104153866-104162286	KO	Rescue	OK	49.8009	33.8238	-0.558134	-3.60895	5e-05	0.000584007	yes	3.60895
XLOC_004531	XLOC_004531	MYEOV	chr11:69061600-69064754	KO	Rescue	OK	0.361522	0.869151	1.26552	3.60467	5e-05	0.000584007	yes	3.60467
XLOC_008401	XLOC_008401	IRF2BPL	chr14:77490885-77495042	KO	Rescue	OK	17.1628	11.5452	-0.571986	-3.60173	5e-05	0.000584007	yes	3.60173
XLOC_029270	XLOC_029270	COL4A6	chrX:107398836-107682863	KO	Rescue	OK	3.14777	1.99329	-0.659183	-3.59902	5e-05	0.000584007	yes	3.59902
XLOC_015461	XLOC_015461	ALPI	chr2:233320783-233325393	KO	Rescue	OK	1.65244	0.862299	-0.938335	-3.59718	5e-05	0.000584007	yes	3.59718
XLOC_012430	XLOC_012430	CTIF	chr18:46065378-46389586	KO	Rescue	OK	7.29537	4.80825	-0.601471	-3.59451	5e-05	0.000584007	yes	3.59451
XLOC_027317	XLOC_027317	FAM189A2	chr9:71939487-72007370	KO	Rescue	OK	0.700774	0.238571	-1.55453	-3.59286	5e-05	0.000584007	yes	3.59286
XLOC_009532	XLOC_009532	WFIKKN1	chr16:679815-684154	KO	Rescue	OK	1.94539	0.996058	-0.96576	-3.59205	5e-05	0.000584007	yes	3.59205
XLOC_007298	XLOC_007298	-	chr13:109917437-109923539	KO	Rescue	OK	9.31971	6.2394	-0.578878	-3.59169	5e-05	0.000584007	yes	3.59169
XLOC_002187	XLOC_002187	ZNF697	chr1:120161999-120191066	KO	Rescue	OK	3.35261	2.13132	-0.653539	-3.58705	5e-05	0.000584007	yes	3.58705
XLOC_022528	XLOC_022528	-	chr6:52860430-52860719	KO	Rescue	OK	15.6322	30.3655	0.957912	3.58691	5e-05	0.000584007	yes	3.58691
XLOC_025593	XLOC_025593	-	chr7:44591630-44593616	KO	Rescue	OK	0.437698	0.0349289	-3.64744	-3.58472	0.00035	0.00330127	yes	3.58472
XLOC_015081	XLOC_015081	INHBB	chr2:121103718-121109383	KO	Rescue	OK	0.228269	0.0382431	-2.57746	-3.58019	5e-05	0.000584007	yes	3.58019
XLOC_001950	XLOC_001950	JUN	chr1:59246462-59249785	KO	Rescue	OK	3.11199	1.89053	-0.719048	-3.57682	5e-05	0.000584007	yes	3.57682
XLOC_012976	XLOC_012976	IL27RA	chr19:14142551-14163717	KO	Rescue	OK	6.55725	10.0483	0.615795	3.57565	5e-05	0.000584007	yes	3.57565
XLOC_019850	XLOC_019850	SH3TC1	chr4:8183748-8242869	KO	Rescue	OK	1.65315	0.963868	-0.778312	-3.56636	5e-05	0.000584007	yes	3.56636
XLOC_029382	XLOC_029382	ZNF75D	chrX:134419722-134478413	KO	Rescue	OK	0.41727	1.1741	1.49251	3.56568	5e-05	0.000584007	yes	3.56568
XLOC_027464	XLOC_027464	HSDL2	chr9:115142188-115234685	KO	Rescue	OK	21.6435	31.9539	0.56206	3.55745	5e-05	0.000584007	yes	3.55745
XLOC_000694	XLOC_000694	-	chr1:109642802-109749403	KO	Rescue	OK	3.0363	0.237506	-3.67628	-3.55727	5e-05	0.000584007	yes	3.55727
XLOC_016280	XLOC_016280	IGFBP5	chr2:217536827-217560272	KO	Rescue	OK	0.237202	0.0882488	-1.42647	-3.55645	5e-05	0.000584007	yes	3.55645
XLOC_012681	XLOC_012681	CCDC68	chr18:52568484-52626739	KO	Rescue	OK	0.723481	0.349889	-1.04806	-3.55315	5e-05	0.000584007	yes	3.55315
XLOC_020292	XLOC_020292	PALLD	chr4:169418216-169849655	KO	Rescue	OK	70.6271	48.0523	-0.555618	-3.55077	5e-05	0.000584007	yes	3.55077
XLOC_004224	XLOC_004224	C11orf74	chr11:36613492-36680823	KO	Rescue	OK	3.17883	1.29173	-1.29919	-3.5495	5e-05	0.000584007	yes	3.5495
XLOC_004646	XLOC_004646	MED17	chr11:93517404-93546496	KO	Rescue	OK	17.1275	25.2319	0.558937	3.54743	5e-05	0.000584007	yes	3.54743
XLOC_019453	XLOC_019453	ARHGAP31	chr3:119013219-119138662	KO	Rescue	OK	0.592213	0.0856657	-2.78933	-3.54734	5e-05	0.000584007	yes	3.54734
XLOC_005474	XLOC_005474	FAM76B	chr11:95502105-95522970	KO	Rescue	OK	4.8617	7.3822	0.602591	3.54459	5e-05	0.000584007	yes	3.54459
XLOC_005445	XLOC_005445	FZD4	chr11:86650167-86666443	KO	Rescue	OK	1.57377	2.96976	0.916123	3.54248	5e-05	0.000584007	yes	3.54248
XLOC_012931	XLOC_012931	LPPR2	chr19:11465830-11476374	KO	Rescue	OK	11.5175	7.58926	-0.601794	-3.54071	5e-05	0.000584007	yes	3.54071
XLOC_017636	XLOC_017636	DGCR6	chr22:18893735-18899601	KO	Rescue	OK	3.94725	2.12225	-0.895253	-3.53623	5e-05	0.000584007	yes	3.53623
XLOC_026627	XLOC_026627	SGK223	chr8:8175257-8244157	KO	Rescue	OK	6.10384	4.02574	-0.600463	-3.53516	5e-05	0.000584007	yes	3.53516
XLOC_009273	XLOC_009273	RPS27L	chr15:63445538-63449741	KO	Rescue	OK	64.8122	43.7739	-0.566195	-3.53482	5e-05	0.000584007	yes	3.53482
XLOC_000767	XLOC_000767	SLC22A15	chr1:116518954-116612675	KO	Rescue	OK	1.80597	0.955664	-0.918198	-3.5348	5e-05	0.000584007	yes	3.5348
XLOC_001943	XLOC_001943	PPAP2B	chr1:56960418-57045257	KO	Rescue	OK	3.58939	2.22549	-0.689615	-3.53263	5e-05	0.000584007	yes	3.53263
XLOC_009265	XLOC_009265	-	chr15:60287847-60291463	KO	Rescue	OK	0.0787461	0.274662	1.80238	3.53209	5e-05	0.000584007	yes	3.53209
XLOC_010501	XLOC_010501	LCAT,SLC12A4	chr16:67973673-68002597	KO	Rescue	OK	8.61371	5.75905	-0.580805	-3.53095	5e-05	0.000584007	yes	3.53095
XLOC_000066	XLOC_000066	ARHGEF16	chr1:3370983-3397695	KO	Rescue	OK	5.90487	9.00654	0.609068	3.53007	5e-05	0.000584007	yes	3.53007
XLOC_027739	XLOC_027739	RFX3	chr9:3221885-3532676	KO	Rescue	OK	0.581306	0.181527	-1.67911	-3.52982	5e-05	0.000584007	yes	3.52982
XLOC_000600	XLOC_000600	CYR61	chr1:86046443-86049648	KO	Rescue	OK	63.2077	42.9847	-0.556277	-3.5278	5e-05	0.000584007	yes	3.5278
XLOC_022896	XLOC_022896	-	chr6:3908750-3913874	KO	Rescue	OK	0.295082	0.0708601	-2.05807	-3.52693	5e-05	0.000584007	yes	3.52693
XLOC_005662	XLOC_005662	FKBP4	chr12:2904099-2914587	KO	Rescue	OK	120.724	178.792	0.566569	3.52595	5e-05	0.000584007	yes	3.52595
XLOC_029265	XLOC_029265	MORC4,RIPPLY1	chrX:106143292-106243487	KO	Rescue	OK	4.5037	2.87117	-0.649474	-3.52195	5e-05	0.000584007	yes	3.52195
XLOC_006159	XLOC_006159	AMDHD1	chr12:96336855-96362370	KO	Rescue	OK	1.11183	0.345374	-1.6867	-3.51029	5e-05	0.000584007	yes	3.51029
XLOC_022300	XLOC_022300	-	chr6:28340486-28342633	KO	Rescue	OK	0.48873	0.145672	-1.74631	-3.50426	5e-05	0.000584007	yes	3.50426
XLOC_018160	XLOC_018160	ANKRD54,MIR658	chr22:38226861-38240378	KO	Rescue	OK	15.3632	23.0795	0.587133	3.49837	5e-05	0.000584007	yes	3.49837
XLOC_001158	XLOC_001158	MR1	chr1:181002560-181031074	KO	Rescue	OK	1.29355	0.794383	-0.703428	-3.49576	5e-05	0.000584007	yes	3.49576
XLOC_002894	XLOC_002894	-	chr10:6779305-6782434	KO	Rescue	OK	0.620229	1.25322	1.01477	3.49486	5e-05	0.000584007	yes	3.49486
XLOC_005712	XLOC_005712	LRRC23	chr12:7013844-7023406	KO	Rescue	OK	3.84817	2.0428	-0.913624	-3.49317	5e-05	0.000584007	yes	3.49317
XLOC_010070	XLOC_010070	CDH15	chr16:89238162-89261900	KO	Rescue	OK	0.232773	0.0310695	-2.90535	-3.49031	5e-05	0.000584007	yes	3.49031
XLOC_018231	XLOC_018231	ARFGAP3	chr22:43192531-43253408	KO	Rescue	OK	10.7678	7.15928	-0.588837	-3.48997	5e-05	0.000584007	yes	3.48997
XLOC_002525	XLOC_002525	TNFSF4	chr1:173152869-173176471	KO	Rescue	OK	0.309973	0.0968853	-1.67779	-3.48681	5e-05	0.000584007	yes	3.48681
XLOC_026932	XLOC_026932	RNF19A	chr8:101269287-101322379	KO	Rescue	OK	25.1306	17.2145	-0.545826	-3.4863	5e-05	0.000584007	yes	3.4863
XLOC_013030	XLOC_013030	FCHO1	chr19:17858526-17899377	KO	Rescue	OK	2.22661	3.60152	0.693756	3.48286	5e-05	0.000584007	yes	3.48286
XLOC_003656	XLOC_003656	RHOBTB1	chr10:62629195-62761198	KO	Rescue	OK	6.43138	9.5287	0.56715	3.48103	5e-05	0.000584007	yes	3.48103
XLOC_019644	XLOC_019644	-	chr3:167383605-167394217	KO	Rescue	OK	0.719702	0.429869	-0.743503	-3.47679	5e-05	0.000584007	yes	3.47679
XLOC_026463	XLOC_026463	MAL2	chr8:120220609-120257914	KO	Rescue	OK	80.1482	55.2543	-0.536582	-3.4695	5e-05	0.000584007	yes	3.4695
XLOC_008920	XLOC_008920	FAM108C1	chr15:80987651-81047962	KO	Rescue	OK	10.8914	7.19219	-0.598689	-3.46927	5e-05	0.000584007	yes	3.46927
XLOC_015961	XLOC_015961	NPHP1	chr2:110880913-110962639	KO	Rescue	OK	2.33567	0.609514	-1.9381	-3.46606	5e-05	0.000584007	yes	3.46606
XLOC_019066	XLOC_019066	-	chr3:4378966-4381730	KO	Rescue	OK	0.431392	0.138911	-1.63484	-3.4639	5e-05	0.000584007	yes	3.4639
XLOC_022858	XLOC_022858	MLLT4	chr6:168227603-168372700	KO	Rescue	OK	0.631476	0.314622	-1.00511	-3.46336	5e-05	0.000584007	yes	3.46336
XLOC_014563	XLOC_014563	ZNF772	chr19:57980814-57988938	KO	Rescue	OK	0.821537	1.3832	0.751615	3.46242	5e-05	0.000584007	yes	3.46242
XLOC_018144	XLOC_018144	IFT27	chr22:37154245-37172177	KO	Rescue	OK	2.83328	1.34535	-1.0745	-3.46222	5e-05	0.000584007	yes	3.46222
XLOC_005966	XLOC_005966	-	chr12:52662972-52665932	KO	Rescue	OK	0.37567	0.120107	-1.64515	-3.46028	5e-05	0.000584007	yes	3.46028
XLOC_018110	XLOC_018110	PLA2G3	chr22:31530792-31536509	KO	Rescue	OK	2.27752	1.24524	-0.871038	-3.46014	5e-05	0.000584007	yes	3.46014
XLOC_015070	XLOC_015070	INSIG2	chr2:118846049-118868531	KO	Rescue	OK	4.16961	2.57669	-0.694391	-3.45933	5e-05	0.000584007	yes	3.45933
XLOC_005402	XLOC_005402	GUCY2EP	chr11:76391209-76436987	KO	Rescue	OK	1.18263	2.21157	0.903073	3.45685	5e-05	0.000584007	yes	3.45685
XLOC_006268	XLOC_006268	SDSL	chr12:113860166-113876081	KO	Rescue	OK	0.158366	0.722754	2.19024	3.45598	5e-05	0.000584007	yes	3.45598
XLOC_006407	XLOC_006407	LPAR5	chr12:6728000-6745297	KO	Rescue	OK	3.15017	1.90937	-0.722334	-3.45589	5e-05	0.000584007	yes	3.45589
XLOC_005461	XLOC_005461	C11orf75	chr11:93211636-93276626	KO	Rescue	OK	14.4616	22.1832	0.617239	3.45469	5e-05	0.000584007	yes	3.45469
XLOC_004360	XLOC_004360	CCDC86	chr11:60609428-60623444	KO	Rescue	OK	64.2617	93.2898	0.53776	3.4453	5e-05	0.000584007	yes	3.4453
XLOC_023537	XLOC_023537	OSTCP1	chr6:159261902-159278664	KO	Rescue	OK	1.16947	0.405165	-1.52928	-3.44351	5e-05	0.000584007	yes	3.44351
XLOC_000612	XLOC_000612	LRRC8B	chr1:89990396-90063420	KO	Rescue	OK	0.393639	0.20057	-0.972771	-3.44285	5e-05	0.000584007	yes	3.44285
XLOC_011147	XLOC_011147	KPNB1	chr17:45726794-45762874	KO	Rescue	OK	194.524	286.911	0.560656	3.44171	5e-05	0.000584007	yes	3.44171
XLOC_010090	XLOC_010090	MC1R,TCF25	chr16:89939292-89987385	KO	Rescue	OK	21.9912	34.5805	0.653031	3.44057	5e-05	0.000584007	yes	3.44057
XLOC_012872	XLOC_012872	STXBP2	chr19:7701986-7712761	KO	Rescue	OK	18.9853	12.7418	-0.575311	-3.43776	5e-05	0.000584007	yes	3.43776
XLOC_011189	XLOC_011189	ABCC3	chr17:48712192-48769234	KO	Rescue	OK	3.26629	5.4228	0.731387	3.437	5e-05	0.000584007	yes	3.437
XLOC_001189	XLOC_001189	RGS2	chr1:192778168-192781407	KO	Rescue	OK	4.29779	7.06124	0.716329	3.43637	5e-05	0.000584007	yes	3.43637
XLOC_013188	XLOC_013188	HKR1	chr19:37808798-37855357	KO	Rescue	OK	1.89234	3.16832	0.743549	3.43527	5e-05	0.000584007	yes	3.43527
XLOC_003208	XLOC_003208	FAS	chr10:90694830-90775542	KO	Rescue	OK	5.37349	3.39001	-0.664573	-3.43313	5e-05	0.000584007	yes	3.43313
XLOC_016671	XLOC_016671	HNF4A	chr20:42984440-43061485	KO	Rescue	OK	0.729549	0.208412	-1.80756	-3.42904	5e-05	0.000584007	yes	3.42904
XLOC_021673	XLOC_021673	IL6ST	chr5:55230924-55290821	KO	Rescue	OK	30.7606	21.3441	-0.527245	-3.42668	5e-05	0.000584007	yes	3.42668
XLOC_018850	XLOC_018850	ZBTB38	chr3:141043054-141168632	KO	Rescue	OK	20.6305	14.252	-0.533618	-3.42462	5e-05	0.000584007	yes	3.42462
XLOC_027457	XLOC_027457	AKAP2,PALM2,PALM2-AKAP2	chr9:112403067-112934793	KO	Rescue	OK	9.00567	6.1653	-0.546663	-3.42317	5e-05	0.000584007	yes	3.42317
XLOC_003685	XLOC_003685	C10orf54	chr10:73156690-73575704	KO	Rescue	OK	1.47509	0.875216	-0.753089	-3.41861	5e-05	0.000584007	yes	3.41861
XLOC_028910	XLOC_028910	SLC6A8	chrX:152953298-152962056	KO	Rescue	OK	2.46275	1.49471	-0.720401	-3.41739	5e-05	0.000584007	yes	3.41739
XLOC_000905	XLOC_000905	TUFT1	chr1:151512780-151556059	KO	Rescue	OK	10.9261	7.33485	-0.574934	-3.41684	5e-05	0.000584007	yes	3.41684
XLOC_010007	XLOC_010007	NUDT7	chr16:77756388-77776157	KO	Rescue	OK	2.60816	1.23002	-1.08435	-3.41319	5e-05	0.000584007	yes	3.41319
XLOC_006972	XLOC_006972	TESC	chr12:117476727-117537251	KO	Rescue	OK	35.0358	23.5278	-0.574462	-3.40979	5e-05	0.000584007	yes	3.40979
XLOC_015418	XLOC_015418	INHA	chr2:220436953-220440435	KO	Rescue	OK	4.64456	2.71703	-0.77351	-3.40637	5e-05	0.000584007	yes	3.40637
XLOC_021966	XLOC_021966	SH3TC2	chr5:148361712-148442746	KO	Rescue	OK	0.601854	0.262697	-1.19601	-3.40605	5e-05	0.000584007	yes	3.40605
XLOC_013186	XLOC_013186	ZNF420	chr19:37569172-37621255	KO	Rescue	OK	1.17859	2.08494	0.822941	3.40447	5e-05	0.000584007	yes	3.40447
XLOC_001388	XLOC_001388	GJC2	chr1:228337414-228347527	KO	Rescue	OK	0.91573	0.418647	-1.12919	-3.40236	5e-05	0.000584007	yes	3.40236
XLOC_017568	XLOC_017568	-	chr21:44748050-44778185	KO	Rescue	OK	1.85987	0.961741	-0.951482	-3.39903	5e-05	0.000584007	yes	3.39903
XLOC_002444	XLOC_002444	IGSF8	chr1:160061128-160068618	KO	Rescue	OK	14.7877	9.97729	-0.567675	-3.3965	5e-05	0.000584007	yes	3.3965
XLOC_026109	XLOC_026109	-	chr8:8412787-8434583	KO	Rescue	OK	1.37682	0.250982	-2.45568	-3.39632	5e-05	0.000584007	yes	3.39632
XLOC_018963	XLOC_018963	B3GNT5	chr3:182895830-183145855	KO	Rescue	OK	3.31448	2.08747	-0.667025	-3.38959	5e-05	0.000584007	yes	3.38959
XLOC_016983	XLOC_016983	PXMP4	chr20:32290549-32308136	KO	Rescue	OK	1.50428	0.925686	-0.700481	-3.38896	5e-05	0.000584007	yes	3.38896
XLOC_016629	XLOC_016629	MYL9	chr20:35169886-35178226	KO	Rescue	OK	18.3632	12.0108	-0.612483	-3.38739	5e-05	0.000584007	yes	3.38739
XLOC_008383	XLOC_008383	MIR4709,NPC2	chr14:74946642-74960084	KO	Rescue	OK	47.7939	32.3164	-0.564562	-3.38306	5e-05	0.000584007	yes	3.38306
XLOC_029046	XLOC_029046	RPGR	chrX:38128422-38186788	KO	Rescue	OK	1.96854	3.19688	0.699536	3.37972	5e-05	0.000584007	yes	3.37972
XLOC_012101	XLOC_012101	PECAM1	chr17:62396776-62410044	KO	Rescue	OK	0.221154	0.0685616	-1.68958	-3.37846	5e-05	0.000584007	yes	3.37846
XLOC_006485	XLOC_006485	MANSC1	chr12:12482217-12503169	KO	Rescue	OK	1.1742	0.525725	-1.1593	-3.37331	5e-05	0.000584007	yes	3.37331
XLOC_021827	XLOC_021827	LOX	chr5:121398886-121414265	KO	Rescue	OK	8.99749	6.15839	-0.54697	-3.37241	5e-05	0.000584007	yes	3.37241
XLOC_000954	XLOC_000954	IL6R	chr1:154377668-154441926	KO	Rescue	OK	2.65221	1.62529	-0.706502	-3.36823	5e-05	0.000584007	yes	3.36823
XLOC_021136	XLOC_021136	ANKRD32	chr5:93486555-94620279	KO	Rescue	OK	19.7359	29.5384	0.581772	3.36786	5e-05	0.000584007	yes	3.36786
XLOC_024967	XLOC_024967	ZNF736	chr7:63773185-63816898	KO	Rescue	OK	0.578553	1.13985	0.978323	3.36742	5e-05	0.000584007	yes	3.36742
XLOC_017822	XLOC_017822	LGALS1	chr22:38071612-38075809	KO	Rescue	OK	327.28	227.425	-0.525135	-3.36708	5e-05	0.000584007	yes	3.36708
XLOC_004371	XLOC_004371	TMEM216	chr11:61159696-61166819	KO	Rescue	OK	4.44167	7.27611	0.712065	3.36593	5e-05	0.000584007	yes	3.36593
XLOC_018795	XLOC_018795	IFT122	chr3:129149786-129239245	KO	Rescue	OK	3.08916	6.63924	1.1038	3.36125	5e-05	0.000584007	yes	3.36125
XLOC_010038	XLOC_010038	KIAA0513	chr16:85061372-85127828	KO	Rescue	OK	1.20399	0.51219	-1.23307	-3.3604	5e-05	0.000584007	yes	3.3604
XLOC_010381	XLOC_010381	STX1B	chr16:31000576-31021829	KO	Rescue	OK	0.860811	0.46604	-0.885241	-3.35967	5e-05	0.000584007	yes	3.35967
XLOC_018197	XLOC_018197	-	chr22:41581228-41582329	KO	Rescue	OK	2.19835	1.02506	-1.10072	-3.35928	5e-05	0.000584007	yes	3.35928
XLOC_025675	XLOC_025675	-	chr7:66372137-66374650	KO	Rescue	OK	0.247507	0.0358617	-2.78696	-3.35877	0.0001	0.00109908	yes	3.35877
XLOC_011137	XLOC_011137	GOSR2	chr17:45000479-45044309	KO	Rescue	OK	48.6598	29.0399	-0.744695	-3.35662	5e-05	0.000584007	yes	3.35662
XLOC_005009	XLOC_005009	RRAS2	chr11:14294760-14386052	KO	Rescue	OK	26.0202	37.6962	0.534787	3.35267	5e-05	0.000584007	yes	3.35267
XLOC_020123	XLOC_020123	PDLIM5	chr4:95373007-95589600	KO	Rescue	OK	29.4136	19.6801	-0.579742	-3.34769	5e-05	0.000584007	yes	3.34769
XLOC_025494	XLOC_025494	CDCA7L	chr7:21582832-21985542	KO	Rescue	OK	13.4637	20.0318	0.573217	3.34284	5e-05	0.000584007	yes	3.34284
XLOC_016027	XLOC_016027	LOC440905	chr2:130783571-130829493	KO	Rescue	OK	0.531533	1.38691	1.38364	3.33877	5e-05	0.000584007	yes	3.33877
XLOC_011110	XLOC_011110	GRN	chr17:42422490-42430476	KO	Rescue	OK	136.632	95.5412	-0.516095	-3.33345	5e-05	0.000584007	yes	3.33345
XLOC_017637	XLOC_017637	DGCR5	chr22:18958010-18982142	KO	Rescue	OK	0.20045	0.0373725	-2.42319	-3.33184	5e-05	0.000584007	yes	3.33184
XLOC_001274	XLOC_001274	-	chr1:206921081-206924504	KO	Rescue	OK	0.241875	0.0136153	-4.15096	-3.33014	0.00265	0.0180043	yes	3.33014
XLOC_005162	XLOC_005162	SLC43A1	chr11:57252003-57283249	KO	Rescue	OK	8.24905	12.2334	0.56853	3.32894	5e-05	0.000584007	yes	3.32894
XLOC_019668	XLOC_019668	ZMAT3	chr3:178661766-178790093	KO	Rescue	OK	17.0443	11.402	-0.580002	-3.32806	5e-05	0.000584007	yes	3.32806
XLOC_004961	XLOC_004961	NLRP10	chr11:7979228-7985178	KO	Rescue	OK	0.325034	0.0934828	-1.79782	-3.32418	5e-05	0.000584007	yes	3.32418
XLOC_011458	XLOC_011458	TLCD2	chr17:1606083-1613662	KO	Rescue	OK	2.17265	1.40251	-0.631445	-3.32195	5e-05	0.000584007	yes	3.32195
XLOC_000506	XLOC_000506	PRKAA2	chr1:57110989-57181008	KO	Rescue	OK	3.76271	5.45445	0.535663	3.31988	5e-05	0.000584007	yes	3.31988
XLOC_010564	XLOC_010564	FA2H	chr16:74746855-74808729	KO	Rescue	OK	6.27452	4.05015	-0.631529	-3.31903	5e-05	0.000584007	yes	3.31903
XLOC_013331	XLOC_013331	IGFL2	chr19:46651038-46664561	KO	Rescue	OK	1.59626	0.122625	-3.70238	-3.31898	0.0006	0.00527906	yes	3.31898
XLOC_010201	XLOC_010201	TFAP4	chr16:4307186-4323001	KO	Rescue	OK	19.1736	27.7497	0.533351	3.31613	5e-05	0.000584007	yes	3.31613
XLOC_013940	XLOC_013940	-	chr19:12796643-12797617	KO	Rescue	OK	0.144437	0.764855	2.40475	3.31163	5e-05	0.000584007	yes	3.31163
XLOC_019836	XLOC_019836	WFS1	chr4:6271576-6304992	KO	Rescue	OK	8.80561	6.00289	-0.552766	-3.31099	5e-05	0.000584007	yes	3.31099
XLOC_008834	XLOC_008834	CORO2B	chr15:68871307-69020144	KO	Rescue	OK	0.715255	0.0634034	-3.49583	-3.30897	5e-05	0.000584007	yes	3.30897
XLOC_012564	XLOC_012564	PIEZO2	chr18:10669993-11149766	KO	Rescue	OK	37.7097	26.2901	-0.520414	-3.30857	5e-05	0.000584007	yes	3.30857
XLOC_023582	XLOC_023582	-	chr6:166276381-166303366	KO	Rescue	OK	0.239156	0.379175	0.664912	3.30633	5e-05	0.000584007	yes	3.30633
XLOC_016396	XLOC_016396	HDAC4	chr2:239969837-240323267	KO	Rescue	OK	3.53653	5.1511	0.542543	3.3061	5e-05	0.000584007	yes	3.3061
XLOC_018841	XLOC_018841	FAIM	chr3:138327541-138352213	KO	Rescue	OK	31.4851	45.9516	0.545445	3.29986	5e-05	0.000584007	yes	3.29986
XLOC_027146	XLOC_027146	VLDLR	chr9:2535654-2656199	KO	Rescue	OK	14.5483	9.9176	-0.552787	-3.29808	5e-05	0.000584007	yes	3.29808
XLOC_018680	XLOC_018680	ALCAM	chr3:105085556-105295757	KO	Rescue	OK	0.225237	0.486751	1.11174	3.29715	5e-05	0.000584007	yes	3.29715
XLOC_004609	XLOC_004609	C11orf82	chr11:82612736-82645840	KO	Rescue	OK	6.55853	9.62622	0.553597	3.29423	5e-05	0.000584007	yes	3.29423
XLOC_026832	XLOC_026832	TRAM1	chr8:71485452-71520694	KO	Rescue	OK	150.146	105.337	-0.511354	-3.29255	5e-05	0.000584007	yes	3.29255
XLOC_009252	XLOC_009252	RFX7	chr15:56379497-56536597	KO	Rescue	OK	4.87593	7.0738	0.536808	3.28932	5e-05	0.000584007	yes	3.28932
XLOC_018753	XLOC_018753	KALRN	chr3:123813557-124440036	KO	Rescue	OK	0.944437	0.48024	-0.975698	-3.28895	5e-05	0.000584007	yes	3.28895
XLOC_019238	XLOC_019238	SHISA5	chr3:48488113-48542259	KO	Rescue	OK	20.9865	33.0138	0.65361	3.28752	5e-05	0.000584007	yes	3.28752
XLOC_006369	XLOC_006369	ZNF268	chr12:133757994-133783740	KO	Rescue	OK	1.69066	2.67454	0.661709	3.28726	5e-05	0.000584007	yes	3.28726
XLOC_021574	XLOC_021574	CDH10	chr5:24487165-24645085	KO	Rescue	OK	3.53073	2.24292	-0.65459	-3.28668	5e-05	0.000584007	yes	3.28668
XLOC_001754	XLOC_001754	COL16A1	chr1:32117847-32169768	KO	Rescue	OK	2.62992	1.52346	-0.787667	-3.2862	5e-05	0.000584007	yes	3.2862
XLOC_025210	XLOC_025210	CAV1	chr7:116164838-116201239	KO	Rescue	OK	81.3806	57.1704	-0.509415	-3.28546	5e-05	0.000584007	yes	3.28546
XLOC_005127	XLOC_005127	-	chr11:47926714-47927736	KO	Rescue	OK	1.0817	0.351836	-1.62033	-3.28	5e-05	0.000584007	yes	3.28
XLOC_002196	XLOC_002196	ANKRD20A12P	chr1:142689809-142713752	KO	Rescue	OK	3.52257	1.9991	-0.817277	-3.27756	5e-05	0.000584007	yes	3.27756
XLOC_022171	XLOC_022171	RIOK1	chr6:7326886-7418270	KO	Rescue	OK	25.5476	36.5531	0.516806	3.27035	5e-05	0.000584007	yes	3.27035
XLOC_026320	XLOC_026320	C8orf46	chr8:67405490-67430759	KO	Rescue	OK	0.375689	0.123167	-1.60892	-3.269	5e-05	0.000584007	yes	3.269
XLOC_014470	XLOC_014470	ZNF350	chr19:52467488-52490079	KO	Rescue	OK	0.563395	1.12635	0.999438	3.26881	5e-05	0.000584007	yes	3.26881
XLOC_026220	XLOC_026220	-	chr8:32785468-32902578	KO	Rescue	OK	0.409414	1.22568	1.58195	3.26532	5e-05	0.000584007	yes	3.26532
XLOC_015854	XLOC_015854	CAPG	chr2:85621870-85641197	KO	Rescue	OK	86.1294	60.4025	-0.511896	-3.26527	5e-05	0.000584007	yes	3.26527
XLOC_007678	XLOC_007678	PCK2	chr14:24563482-24573339	KO	Rescue	OK	11.1008	16.1755	0.543149	3.26441	5e-05	0.000584007	yes	3.26441
XLOC_027364	XLOC_027364	C9orf47,S1PR3	chr9:91605777-91620069	KO	Rescue	OK	4.3771	2.92584	-0.581127	-3.26315	5e-05	0.000584007	yes	3.26315
XLOC_027078	XLOC_027078	LY6D	chr8:143866297-143868008	KO	Rescue	OK	1.07304	0.264266	-2.02164	-3.26304	5e-05	0.000584007	yes	3.26304
XLOC_003587	XLOC_003587	RASGEF1A	chr10:43689983-43762367	KO	Rescue	OK	8.26576	12.0069	0.538646	3.26262	5e-05	0.000584007	yes	3.26262
XLOC_018984	XLOC_018984	CHRD	chr3:184097860-184107617	KO	Rescue	OK	0.237669	0.0359217	-2.72603	-3.26166	5e-05	0.000584007	yes	3.26166
XLOC_013275	XLOC_013275	CD177	chr19:43857824-43867480	KO	Rescue	OK	0.360592	0.0967861	-1.8975	-3.26114	5e-05	0.000584007	yes	3.26114
XLOC_025203	XLOC_025203	IFRD1	chr7:112063198-112117258	KO	Rescue	OK	15.3992	22.017	0.51576	3.26059	5e-05	0.000584007	yes	3.26059
XLOC_019656	XLOC_019656	RPL22L1	chr3:170582664-170588297	KO	Rescue	OK	21.7589	15.011	-0.53559	-3.26016	5e-05	0.000584007	yes	3.26016
XLOC_026988	XLOC_026988	KLHL38	chr8:124656647-124665190	KO	Rescue	OK	0.26574	0.0446728	-2.57255	-3.25872	5e-05	0.000584007	yes	3.25872
XLOC_021917	XLOC_021917	NRG2	chr5:139226363-139422884	KO	Rescue	OK	1.14937	0.486231	-1.24113	-3.25551	5e-05	0.000584007	yes	3.25551
XLOC_018806	XLOC_018806	NEK11	chr3:130745693-131100319	KO	Rescue	OK	1.09736	0.544014	-1.01233	-3.2494	5e-05	0.000584007	yes	3.2494
XLOC_029275	XLOC_029275	AMMECR1	chrX:109437413-109699562	KO	Rescue	OK	9.30246	6.45012	-0.528287	-3.24537	5e-05	0.000584007	yes	3.24537
XLOC_001082	XLOC_001082	-	chr1:165890461-165893368	KO	Rescue	OK	0.27716	0.0758911	-1.86872	-3.24328	5e-05	0.000584007	yes	3.24328
XLOC_006771	XLOC_006771	PPM1H	chr12:63037762-63328665	KO	Rescue	OK	9.69384	13.8094	0.510509	3.24325	5e-05	0.000584007	yes	3.24325
XLOC_014144	XLOC_014144	ZNF529	chr19:37034516-37096178	KO	Rescue	OK	1.69482	2.67632	0.659124	3.24268	5e-05	0.000584007	yes	3.24268
XLOC_015445	XLOC_015445	ITM2C	chr2:231729620-231743963	KO	Rescue	OK	13.2102	8.97417	-0.557798	-3.24207	5e-05	0.000584007	yes	3.24207
XLOC_014353	XLOC_014353	PLA2G4C	chr19:48551099-48614109	KO	Rescue	OK	0.385728	0.0976315	-1.98217	-3.24144	5e-05	0.000584007	yes	3.24144
XLOC_001206	XLOC_001206	CRB1	chr1:197170591-197450610	KO	Rescue	OK	8.89236	5.73044	-0.633921	-3.24083	5e-05	0.000584007	yes	3.24083
XLOC_013715	XLOC_013715	C19orf26	chr19:1184513-1238097	KO	Rescue	OK	2.17856	3.60397	0.726216	3.23903	5e-05	0.000584007	yes	3.23903
XLOC_004562	XLOC_004562	P2RY6	chr11:72975569-73014576	KO	Rescue	OK	18.3568	27.8259	0.600117	3.23857	5e-05	0.000584007	yes	3.23857
XLOC_004201	XLOC_004201	NAT10	chr11:34126861-34172199	KO	Rescue	OK	31.6914	44.9003	0.502633	3.23832	5e-05	0.000584007	yes	3.23832
XLOC_004100	XLOC_004100	PPFIBP2	chr11:7534995-7676768	KO	Rescue	OK	6.18224	4.10515	-0.590693	-3.23785	5e-05	0.000584007	yes	3.23785
XLOC_006905	XLOC_006905	SLC41A2	chr12:105195572-105352530	KO	Rescue	OK	10.2772	7.05171	-0.543398	-3.2375	5e-05	0.000584007	yes	3.2375
XLOC_027839	XLOC_027839	AQP3	chr9:33441151-33447631	KO	Rescue	OK	96.4273	68.1083	-0.50161	-3.23739	5e-05	0.000584007	yes	3.23739
XLOC_017957	XLOC_017957	MAPK8IP2	chr22:51038525-51052374	KO	Rescue	OK	2.0158	1.21963	-0.724913	-3.23454	5e-05	0.000584007	yes	3.23454
XLOC_022046	XLOC_022046	SH3PXD2B	chr5:171760502-171881527	KO	Rescue	OK	20.3279	14.3609	-0.501308	-3.2336	5e-05	0.000584007	yes	3.2336
XLOC_018532	XLOC_018532	SEMA3F	chr3:50192431-50226508	KO	Rescue	OK	29.6768	20.8758	-0.507502	-3.23072	5e-05	0.000584007	yes	3.23072
XLOC_023320	XLOC_023320	-	chr6:82362942-82367679	KO	Rescue	OK	0.113393	0.282216	1.31547	3.22853	5e-05	0.000584007	yes	3.22853
XLOC_025416	XLOC_025416	DNAJB6	chr7:157129709-157210133	KO	Rescue	OK	52.5404	75.242	0.51811	3.22717	5e-05	0.000584007	yes	3.22717
XLOC_012772	XLOC_012772	EFNA2	chr19:1286152-1301429	KO	Rescue	OK	1.98738	3.25652	0.712465	3.22686	5e-05	0.000584007	yes	3.22686
XLOC_025517	XLOC_025517	SKAP2	chr7:26706687-26904341	KO	Rescue	OK	5.03858	3.38816	-0.572516	-3.22563	5e-05	0.000584007	yes	3.22563
XLOC_023585	XLOC_023585	-	chr6:166312494-166315092	KO	Rescue	OK	1.02695	1.78322	0.79612	3.22532	5e-05	0.000584007	yes	3.22532
XLOC_029348	XLOC_029348	-	chrX:130495542-130503015	KO	Rescue	OK	0.246304	0.0745299	-1.72455	-3.2219	5e-05	0.000584007	yes	3.2219
XLOC_016916	XLOC_016916	RRBP1	chr20:17594270-17663112	KO	Rescue	OK	36.126	25.4792	-0.503717	-3.22094	5e-05	0.000584007	yes	3.22094
XLOC_016626	XLOC_016626	EPB41L1	chr20:34679425-34820721	KO	Rescue	OK	17.5591	12.353	-0.507362	-3.21975	5e-05	0.000584007	yes	3.21975
XLOC_021510	XLOC_021510	LOC100506688	chr5:987334-997456	KO	Rescue	OK	0.565235	0.233727	-1.27402	-3.21959	5e-05	0.000584007	yes	3.21959
XLOC_025595	XLOC_025595	-	chr7:44596272-44597599	KO	Rescue	OK	0.399539	0.0492952	-3.01882	-3.21201	0.0007	0.00603534	yes	3.21201
XLOC_002169	XLOC_002169	IGSF3	chr1:117115976-117210374	KO	Rescue	OK	13.5764	9.5673	-0.504918	-3.21177	5e-05	0.000584007	yes	3.21177
XLOC_028520	XLOC_028520	PORCN	chrX:48366984-48379202	KO	Rescue	OK	3.88275	6.06841	0.644239	3.21138	5e-05	0.000584007	yes	3.21138
XLOC_029215	XLOC_029215	BRWD3	chrX:79924986-80065233	KO	Rescue	OK	2.63364	3.77566	0.519673	3.21125	5e-05	0.000584007	yes	3.21125
XLOC_007641	XLOC_007641	ANG,RNASE4	chr14:21152335-21168758	KO	Rescue	OK	1.55528	0.665555	-1.22454	-3.21013	5e-05	0.000584007	yes	3.21013
XLOC_004215	XLOC_004215	-	chr11:35041616-35043149	KO	Rescue	OK	1.68955	2.96047	0.809184	3.20825	5e-05	0.000584007	yes	3.20825
XLOC_010678	XLOC_010678	SERPINF2	chr17:1646129-1658559	KO	Rescue	OK	0.778698	1.46978	0.916461	3.20214	5e-05	0.000584007	yes	3.20214
XLOC_022689	XLOC_022689	SMPDL3A	chr6:123109970-123130864	KO	Rescue	OK	1.1876	0.595184	-0.996637	-3.19885	5e-05	0.000584007	yes	3.19885
XLOC_004613	XLOC_004613	TMEM126B	chr11:85339610-85347583	KO	Rescue	OK	35.3297	50.8068	0.524139	3.19743	5e-05	0.000584007	yes	3.19743
XLOC_020877	XLOC_020877	CEP72	chr5:612404-693510	KO	Rescue	OK	8.93637	14.7098	0.71902	3.19657	5e-05	0.000584007	yes	3.19657
XLOC_001182	XLOC_001182	PLA2G4A	chr1:186798031-186958113	KO	Rescue	OK	4.6932	6.95127	0.566703	3.19126	5e-05	0.000584007	yes	3.19126
XLOC_017291	XLOC_017291	ETS2	chr21:40177047-40196881	KO	Rescue	OK	45.5881	32.3388	-0.495389	-3.1905	5e-05	0.000584007	yes	3.1905
XLOC_026052	XLOC_026052	XRCC2	chr7:152338453-152373268	KO	Rescue	OK	4.6687	7.15991	0.61692	3.18949	5e-05	0.000584007	yes	3.18949
XLOC_022527	XLOC_022527	TMEM14A	chr6:52535883-52551385	KO	Rescue	OK	31.2678	21.4715	-0.542252	-3.18794	5e-05	0.000584007	yes	3.18794
XLOC_001751	XLOC_001751	SNRNP40	chr1:31732414-31769644	KO	Rescue	OK	44.9628	63.5469	0.499091	3.17942	5e-05	0.000584007	yes	3.17942
XLOC_006837	XLOC_006837	MKRN9P	chr12:88071879-88200338	KO	Rescue	OK	7.15318	2.36092	-1.59923	-3.17691	5e-05	0.000584007	yes	3.17691
XLOC_012351	XLOC_012351	SLMO1	chr18:12407885-12433079	KO	Rescue	OK	1.74139	2.93042	0.75087	3.17674	5e-05	0.000584007	yes	3.17674
XLOC_026053	XLOC_026053	PAXIP1	chr7:154720226-154794682	KO	Rescue	OK	8.74985	12.5554	0.520977	3.17508	5e-05	0.000584007	yes	3.17508
XLOC_011202	XLOC_011202	PCTP	chr17:53828339-53854748	KO	Rescue	OK	3.18751	5.13312	0.687408	3.17002	5e-05	0.000584007	yes	3.17002
XLOC_021605	XLOC_021605	UGT3A2	chr5:36035118-36067023	KO	Rescue	OK	0.493763	0.0549582	-3.16741	-3.16969	5e-05	0.000584007	yes	3.16969
XLOC_026195	XLOC_026195	PTK2B	chr8:27168998-27316908	KO	Rescue	OK	2.97699	1.94653	-0.612953	-3.16966	5e-05	0.000584007	yes	3.16966
XLOC_005250	XLOC_005250	PYGM	chr11:64513860-64528187	KO	Rescue	OK	0.306344	0.042523	-2.84884	-3.16952	5e-05	0.000584007	yes	3.16952
XLOC_002070	XLOC_002070	DPYD	chr1:97543299-98386615	KO	Rescue	OK	0.103948	0.330762	1.66994	3.16756	5e-05	0.000584007	yes	3.16756
XLOC_018774	XLOC_018774	-	chr3:128234307-128235279	KO	Rescue	OK	0.878671	0.215469	-2.02784	-3.16373	0.0001	0.00109908	yes	3.16373
XLOC_022256	XLOC_022256	BTN3A2	chr6:26365363-26378676	KO	Rescue	OK	6.48492	9.37052	0.531041	3.16255	5e-05	0.000584007	yes	3.16255
XLOC_015338	XLOC_015338	NRP2	chr2:206547196-206662857	KO	Rescue	OK	0.269528	0.607109	1.17152	3.16209	5e-05	0.000584007	yes	3.16209
XLOC_026998	XLOC_026998	-	chr8:128123023-128241813	KO	Rescue	OK	76.2929	112.413	0.559188	3.16157	5e-05	0.000584007	yes	3.16157
XLOC_002967	XLOC_002967	-	chr10:29431564-29432968	KO	Rescue	OK	2.72856	1.25926	-1.11557	-3.16057	5e-05	0.000584007	yes	3.16057
XLOC_006367	XLOC_006367	ZNF140	chr12:133656910-133688901	KO	Rescue	OK	2.28679	3.71986	0.701926	3.15937	5e-05	0.000584007	yes	3.15937
XLOC_017946	XLOC_017946	PANX2	chr22:50608496-50618724	KO	Rescue	OK	1.83048	2.88414	0.655922	3.15755	5e-05	0.000584007	yes	3.15755
XLOC_012067	XLOC_012067	LOC645638	chr17:58160925-58165828	KO	Rescue	OK	5.83549	2.94085	-0.988621	-3.15723	5e-05	0.000584007	yes	3.15723
XLOC_009270	XLOC_009270	VPS13C	chr15:62144589-62352690	KO	Rescue	OK	6.26977	4.19547	-0.579578	-3.15667	5e-05	0.000584007	yes	3.15667
XLOC_004995	XLOC_004995	-	chr11:12296000-12297824	KO	Rescue	OK	0.325108	0.0339348	-3.26008	-3.15457	0.00585	0.0338928	yes	3.15457
XLOC_025721	XLOC_025721	-	chr7:75700497-75704757	KO	Rescue	OK	0.284296	0.112467	-1.33789	-3.15357	5e-05	0.000584007	yes	3.15357
XLOC_014301	XLOC_014301	RTN2	chr19:45988545-46000313	KO	Rescue	OK	8.61616	5.41596	-0.669828	-3.15253	5e-05	0.000584007	yes	3.15253
XLOC_011205	XLOC_011205	DGKE	chr17:54869273-54946878	KO	Rescue	OK	1.57872	2.37541	0.589419	3.15056	5e-05	0.000584007	yes	3.15056
XLOC_012713	XLOC_012713	DSEL	chr18:65173818-65566856	KO	Rescue	OK	4.56725	6.47973	0.504608	3.14813	5e-05	0.000584007	yes	3.14813
XLOC_014029	XLOC_014029	CRLF1	chr19:18704034-18717774	KO	Rescue	OK	41.7594	29.467	-0.503001	-3.14288	5e-05	0.000584007	yes	3.14288
XLOC_013251	XLOC_013251	CCDC97	chr19:41816093-41830788	KO	Rescue	OK	12.3107	17.4763	0.505483	3.14129	5e-05	0.000584007	yes	3.14129
XLOC_016205	XLOC_016205	SDPR	chr2:192699031-192712006	KO	Rescue	OK	0.295443	0.101424	-1.54248	-3.14025	5e-05	0.000584007	yes	3.14025
XLOC_020282	XLOC_020282	MSMO1	chr4:166248817-166264314	KO	Rescue	OK	25.3625	17.8562	-0.506275	-3.13965	5e-05	0.000584007	yes	3.13965
XLOC_012556	XLOC_012556	LINC00668	chr18:6925297-6929975	KO	Rescue	OK	2.28382	1.32113	-0.789672	-3.13878	5e-05	0.000584007	yes	3.13878
XLOC_000706	XLOC_000706	GNAT2	chr1:110145888-110160988	KO	Rescue	OK	0.784941	0.395457	-0.989061	-3.13537	5e-05	0.000584007	yes	3.13537
XLOC_005050	XLOC_005050	CCDC34	chr11:27354158-27384844	KO	Rescue	OK	38.8245	54.7398	0.495623	3.13387	5e-05	0.000584007	yes	3.13387
XLOC_011275	XLOC_011275	PITPNC1	chr17:65373396-65693379	KO	Rescue	OK	4.52443	6.44449	0.51033	3.13223	5e-05	0.000584007	yes	3.13223
XLOC_009862	XLOC_009862	MT2A	chr16:56642477-56643409	KO	Rescue	OK	310.323	219.601	-0.498888	-3.1319	5e-05	0.000584007	yes	3.1319
XLOC_014659	XLOC_014659	-	chr2:20650664-20674605	KO	Rescue	OK	0.930226	0.191909	-2.27716	-3.12648	5e-05	0.000584007	yes	3.12648
XLOC_007673	XLOC_007673	DHRS2	chr14:24105572-24114848	KO	Rescue	OK	2.68125	1.55503	-0.785968	-3.12612	5e-05	0.000584007	yes	3.12612
XLOC_026812	XLOC_026812	PDE7A	chr8:66625597-66754791	KO	Rescue	OK	8.43864	5.92534	-0.510113	-3.12319	5e-05	0.000584007	yes	3.12319
XLOC_017151	XLOC_017151	CABLES2	chr20:60963685-60982339	KO	Rescue	OK	2.01632	1.27204	-0.664573	-3.12247	5e-05	0.000584007	yes	3.12247
XLOC_007612	XLOC_007612	-	chr13:114235835-114237947	KO	Rescue	OK	0.425446	0.135592	-1.64971	-3.12152	5e-05	0.000584007	yes	3.12152
XLOC_012744	XLOC_012744	FSTL3	chr19:676388-683392	KO	Rescue	OK	236.184	168.496	-0.487192	-3.12118	5e-05	0.000584007	yes	3.12118
XLOC_017421	XLOC_017421	-	chr21:16193616-16197896	KO	Rescue	OK	0.339421	0.125417	-1.43634	-3.12108	0.0001	0.00109908	yes	3.12108
XLOC_000708	XLOC_000708	GSTM4	chr1:110198697-110208123	KO	Rescue	OK	11.6304	7.78329	-0.579443	-3.11864	5e-05	0.000584007	yes	3.11864
XLOC_021342	XLOC_021342	SLC26A2	chr5:149340299-149366963	KO	Rescue	OK	10.2346	7.2785	-0.491748	-3.11825	5e-05	0.000584007	yes	3.11825
XLOC_010448	XLOC_010448	PLLP	chr16:57287676-57318584	KO	Rescue	OK	21.9738	31.3353	0.512007	3.11634	5e-05	0.000584007	yes	3.11634
XLOC_008281	XLOC_008281	TXNDC16	chr14:52897208-53019301	KO	Rescue	OK	3.76904	2.55113	-0.563058	-3.11373	5e-05	0.000584007	yes	3.11373
XLOC_012217	XLOC_012217	-	chr17:77724081-77726495	KO	Rescue	OK	0.36072	0.767355	1.08901	3.11281	5e-05	0.000584007	yes	3.11281
XLOC_022889	XLOC_022889	TUBB2A	chr6:3153901-3157783	KO	Rescue	OK	10.3402	6.94922	-0.573337	-3.11241	5e-05	0.000584007	yes	3.11241
XLOC_009383	XLOC_009383	NRG4	chr15:76228361-76304919	KO	Rescue	OK	7.6324	12.8324	0.749583	3.11133	5e-05	0.000584007	yes	3.11133
XLOC_005163	XLOC_005163	TIMM10	chr11:57295935-57298232	KO	Rescue	OK	60.0099	85.2422	0.506367	3.10852	5e-05	0.000584007	yes	3.10852
XLOC_001896	XLOC_001896	PDZK1IP1	chr1:47649260-47655771	KO	Rescue	OK	1.4908	0.580449	-1.36084	-3.10495	5e-05	0.000584007	yes	3.10495
XLOC_013438	XLOC_013438	ATF5,MIR4751	chr19:50392912-50437245	KO	Rescue	OK	21.531	44.4772	1.04665	3.10462	5e-05	0.000584007	yes	3.10462
XLOC_009467	XLOC_009467	IDH2	chr15:90626207-90645850	KO	Rescue	OK	21.694	15.1402	-0.518907	-3.10097	5e-05	0.000584007	yes	3.10097
XLOC_028237	XLOC_028237	FNBP1	chr9:132649455-132805525	KO	Rescue	OK	16.9278	12.0165	-0.494375	-3.10018	5e-05	0.000584007	yes	3.10018
XLOC_020673	XLOC_020673	ARSJ	chr4:114821321-114901098	KO	Rescue	OK	0.472162	0.825982	0.806829	3.09836	5e-05	0.000584007	yes	3.09836
XLOC_023316	XLOC_023316	LCA5	chr6:80194707-80247147	KO	Rescue	OK	0.130785	0.361591	1.46716	3.09804	5e-05	0.000584007	yes	3.09804
XLOC_021642	XLOC_021642	OXCT1	chr5:41730166-41870791	KO	Rescue	OK	175.564	125.54	-0.483857	-3.09771	5e-05	0.000584007	yes	3.09771
XLOC_002782	XLOC_002782	SIPA1L2	chr1:232533711-232765889	KO	Rescue	OK	9.58905	6.80114	-0.495612	-3.09494	5e-05	0.000584007	yes	3.09494
XLOC_013723	XLOC_013723	MEX3D	chr19:1554667-1568057	KO	Rescue	OK	12.5165	17.7282	0.502214	3.09349	5e-05	0.000584007	yes	3.09349
XLOC_019440	XLOC_019440	-	chr3:113428535-113431034	KO	Rescue	OK	0.236513	0.0532889	-2.15001	-3.09148	0.00015	0.00158822	yes	3.09148
XLOC_015974	XLOC_015974	-	chr2:112002012-112005139	KO	Rescue	OK	0.906942	0.487386	-0.895944	-3.09022	5e-05	0.000584007	yes	3.09022
XLOC_003997	XLOC_003997	IFITM2	chr11:308106-309410	KO	Rescue	OK	121.05	86.1749	-0.49026	-3.08893	5e-05	0.000584007	yes	3.08893
XLOC_012729	XLOC_012729	MBP	chr18:74690788-74844800	KO	Rescue	OK	4.21271	2.87273	-0.552328	-3.08481	5e-05	0.000584007	yes	3.08481
XLOC_015427	XLOC_015427	NYAP2	chr2:226265601-226568349	KO	Rescue	OK	1.69734	2.63584	0.634986	3.084	5e-05	0.000584007	yes	3.084
XLOC_005670	XLOC_005670	TSPAN9	chr12:3186520-3395730	KO	Rescue	OK	4.9066	3.36616	-0.543618	-3.08242	5e-05	0.000584007	yes	3.08242
XLOC_015900	XLOC_015900	ADRA2B	chr2:96778622-96781888	KO	Rescue	OK	0.201633	0.0165252	-3.609	-3.08235	0.00415	0.0257718	yes	3.08235
XLOC_015025	XLOC_015025	SOWAHC	chr2:110371910-110376564	KO	Rescue	OK	11.5658	16.2108	0.48709	3.07967	5e-05	0.000584007	yes	3.07967
XLOC_007598	XLOC_007598	LINC00346	chr13:111516333-111522655	KO	Rescue	OK	0.313104	0.155498	-1.00974	-3.07594	5e-05	0.000584007	yes	3.07594
XLOC_004896	XLOC_004896	NUP98	chr11:3696123-3847703	KO	Rescue	OK	41.9992	59.7933	0.50962	3.07284	5e-05	0.000584007	yes	3.07284
XLOC_009260	XLOC_009260	-	chr15:59417270-59424267	KO	Rescue	OK	0.307931	0.535896	0.799344	3.07192	5e-05	0.000584007	yes	3.07192
XLOC_013808	XLOC_013808	RFX2	chr19:5978413-6110664	KO	Rescue	OK	1.00451	0.586476	-0.776349	-3.0715	5e-05	0.000584007	yes	3.0715
XLOC_014143	XLOC_014143	ZNF260	chr19:37001549-37019248	KO	Rescue	OK	4.17972	5.97334	0.51513	3.06828	5e-05	0.000584007	yes	3.06828
XLOC_007766	XLOC_007766	SAMD4A	chr14:55032749-55260033	KO	Rescue	OK	2.67542	1.82487	-0.55197	-3.06717	5e-05	0.000584007	yes	3.06717
XLOC_018926	XLOC_018926	SERPINI1	chr3:167453304-167543357	KO	Rescue	OK	30.2257	21.3796	-0.49954	-3.06615	5e-05	0.000584007	yes	3.06615
XLOC_017553	XLOC_017553	-	chr21:44247464-44251564	KO	Rescue	OK	0.469332	0.228289	-1.03975	-3.06441	5e-05	0.000584007	yes	3.06441
XLOC_006501	XLOC_006501	MGP	chr12:15034114-15038853	KO	Rescue	OK	14.4321	9.84357	-0.552029	-3.06231	5e-05	0.000584007	yes	3.06231
XLOC_019530	XLOC_019530	TMCC1	chr3:129366634-129612675	KO	Rescue	OK	5.96978	9.27341	0.635422	3.06165	5e-05	0.000584007	yes	3.06165
XLOC_017580	XLOC_017580	DNMT3L	chr21:45663342-45682099	KO	Rescue	OK	2.17713	4.25469	0.966622	3.06114	5e-05	0.000584007	yes	3.06114
XLOC_022146	XLOC_022146	FOXF2	chr6:1383392-1395836	KO	Rescue	OK	8.14138	12.188	0.582114	3.06083	5e-05	0.000584007	yes	3.06083
XLOC_008822	XLOC_008822	-	chr15:67142752-67145316	KO	Rescue	OK	0.252055	0.0616039	-2.03264	-3.06007	5e-05	0.000584007	yes	3.06007
XLOC_022842	XLOC_022842	-	chr6:160693594-160701440	KO	Rescue	OK	0.503698	0.860094	0.771934	3.05826	5e-05	0.000584007	yes	3.05826
XLOC_027068	XLOC_027068	PSCA	chr8:143751725-143764145	KO	Rescue	OK	2.1496	0.939982	-1.19336	-3.05812	5e-05	0.000584007	yes	3.05812
XLOC_028446	XLOC_028446	PDK3	chrX:24483343-24568583	KO	Rescue	OK	8.46144	4.79863	-0.81828	-3.05771	5e-05	0.000584007	yes	3.05771
XLOC_023583	XLOC_023583	-	chr6:166303607-166310024	KO	Rescue	OK	0.401791	0.678927	0.75681	3.05657	5e-05	0.000584007	yes	3.05657
XLOC_024825	XLOC_024825	LOC100506178	chr7:22601706-22613617	KO	Rescue	OK	0.557804	0.0454806	-3.61643	-3.05544	5e-05	0.000584007	yes	3.05544
XLOC_026880	XLOC_026880	-	chr8:88553243-88579277	KO	Rescue	OK	0.477814	0.0465993	-3.35807	-3.05499	0.0011	0.00875456	yes	3.05499
XLOC_022218	XLOC_022218	RNF144B	chr6:18387578-18469105	KO	Rescue	OK	4.35728	3.0114	-0.532995	-3.05442	5e-05	0.000584007	yes	3.05442
XLOC_004976	XLOC_004976	TMEM41B	chr11:9302200-9336315	KO	Rescue	OK	11.7941	17.1551	0.540573	3.051	5e-05	0.000584007	yes	3.051
XLOC_009901	XLOC_009901	CDH5	chr16:66400524-66438689	KO	Rescue	OK	0.287373	0.055966	-2.3603	-3.0505	5e-05	0.000584007	yes	3.0505
XLOC_008459	XLOC_008459	LINC00341	chr14:95873603-95876427	KO	Rescue	OK	0.500509	0.217828	-1.20021	-3.04897	5e-05	0.000584007	yes	3.04897
XLOC_022195	XLOC_022195	EDN1	chr6:12288693-12297427	KO	Rescue	OK	3.81713	2.41242	-0.662007	-3.04712	5e-05	0.000584007	yes	3.04712
XLOC_021969	XLOC_021969	PDE6A	chr5:149237518-149324356	KO	Rescue	OK	0.438365	0.215082	-1.02725	-3.0454	5e-05	0.000584007	yes	3.0454
XLOC_011303	XLOC_011303	GPRC5C	chr17:72427666-72443568	KO	Rescue	OK	7.00811	4.73603	-0.565346	-3.04396	5e-05	0.000584007	yes	3.04396
XLOC_011608	XLOC_011608	TRIM16	chr17:15526668-15587633	KO	Rescue	OK	21.6698	30.2138	0.479521	3.04389	5e-05	0.000584007	yes	3.04389
XLOC_006797	XLOC_006797	TSPAN8	chr12:71518876-71551779	KO	Rescue	OK	1.52644	0.686818	-1.15217	-3.04325	5e-05	0.000584007	yes	3.04325
XLOC_014828	XLOC_014828	UGP2	chr2:64068097-64118696	KO	Rescue	OK	83.4995	60.3029	-0.46954	-3.04158	5e-05	0.000584007	yes	3.04158
XLOC_006487	XLOC_006487	DUSP16	chr12:12510019-12715448	KO	Rescue	OK	26.5879	18.8517	-0.49607	-3.04107	5e-05	0.000584007	yes	3.04107
XLOC_010306	XLOC_010306	USP31	chr16:23072639-23160783	KO	Rescue	OK	6.59094	4.27532	-0.624453	-3.03989	5e-05	0.000584007	yes	3.03989
XLOC_004115	XLOC_004115	WEE1	chr11:9595227-9611313	KO	Rescue	OK	14.5111	20.2922	0.483769	3.03957	5e-05	0.000584007	yes	3.03957
XLOC_004219	XLOC_004219	LDLRAD3	chr11:35965581-36253738	KO	Rescue	OK	7.63018	10.8742	0.511116	3.03707	5e-05	0.000584007	yes	3.03707
XLOC_003672	XLOC_003672	AIFM2	chr10:71812356-71893066	KO	Rescue	OK	10.9908	16.1938	0.559153	3.0368	5e-05	0.000584007	yes	3.0368
XLOC_004222	XLOC_004222	-	chr11:36498363-36502895	KO	Rescue	OK	0.222063	0.0833164	-1.4143	-3.03432	5e-05	0.000584007	yes	3.03432
XLOC_008878	XLOC_008878	MPI	chr15:75182142-75190855	KO	Rescue	OK	11.7267	16.7541	0.514722	3.03411	5e-05	0.000584007	yes	3.03411
XLOC_017549	XLOC_017549	-	chr21:44019380-44027699	KO	Rescue	OK	0.568766	0.176842	-1.68537	-3.03143	5e-05	0.000584007	yes	3.03143
XLOC_004311	XLOC_004311	P2RX3	chr11:57105840-57141720	KO	Rescue	OK	0.586485	0.96251	0.714707	3.03091	5e-05	0.000584007	yes	3.03091
XLOC_027874	XLOC_027874	RMRP	chr9:35657747-35658015	KO	Rescue	OK	9.33746	18.6191	0.995684	3.02863	5e-05	0.000584007	yes	3.02863
XLOC_022050	XLOC_022050	STC2	chr5:172741725-172756506	KO	Rescue	OK	5.57796	7.85785	0.494397	3.02664	5e-05	0.000584007	yes	3.02664
XLOC_008086	XLOC_008086	TDRD9	chr14:104394765-104519004	KO	Rescue	OK	7.00637	9.86188	0.493197	3.02536	5e-05	0.000584007	yes	3.02536
XLOC_005199	XLOC_005199	CPSF7	chr11:61170119-61197464	KO	Rescue	OK	51.9714	71.7724	0.465713	3.02447	5e-05	0.000584007	yes	3.02447
XLOC_002065	XLOC_002065	ARHGAP29	chr1:94632404-94713312	KO	Rescue	OK	8.58605	6.15968	-0.479138	-3.02228	5e-05	0.000584007	yes	3.02228
XLOC_019627	XLOC_019627	VEPH1	chr3:156977531-157221415	KO	Rescue	OK	0.253707	0.835443	1.71938	3.02127	5e-05	0.000584007	yes	3.02127
XLOC_005687	XLOC_005687	CD9	chr12:6309481-6347437	KO	Rescue	OK	180.583	130.645	-0.467015	-3.02021	5e-05	0.000584007	yes	3.02021
XLOC_017345	XLOC_017345	-	chr21:45239406-45241449	KO	Rescue	OK	0.346747	0.100859	-1.78155	-3.01998	5e-05	0.000584007	yes	3.01998
XLOC_011701	XLOC_011701	CRLF3	chr17:29103621-29151778	KO	Rescue	OK	6.8043	10.0181	0.558093	3.01713	5e-05	0.000584007	yes	3.01713
XLOC_016241	XLOC_016241	RAPH1	chr2:204298301-204400207	KO	Rescue	OK	10.4428	7.43149	-0.490783	-3.01698	5e-05	0.000584007	yes	3.01698
XLOC_002566	XLOC_002566	GLUL	chr1:182350838-182361341	KO	Rescue	OK	21.8176	30.2375	0.470848	3.01578	5e-05	0.000584007	yes	3.01578
XLOC_004998	XLOC_004998	RASSF10	chr11:13012469-13054557	KO	Rescue	OK	3.48202	4.93811	0.504035	3.01194	5e-05	0.000584007	yes	3.01194
XLOC_002290	XLOC_002290	SEMA6C	chr1:151103954-151119747	KO	Rescue	OK	0.392204	0.726813	0.889978	3.0114	5e-05	0.000584007	yes	3.0114
XLOC_021421	XLOC_021421	CPEB4	chr5:173315066-173387420	KO	Rescue	OK	5.81914	4.14224	-0.490396	-3.01136	5e-05	0.000584007	yes	3.01136
XLOC_021681	XLOC_021681	ELOVL7	chr5:60047615-60140101	KO	Rescue	OK	1.31386	0.589558	-1.15611	-3.01028	5e-05	0.000584007	yes	3.01028
XLOC_000652	XLOC_000652	-	chr1:100495094-100501451	KO	Rescue	OK	0.234966	0.429596	0.870529	3.00736	5e-05	0.000584007	yes	3.00736
XLOC_006795	XLOC_006795	PTPRB	chr12:70861875-71031220	KO	Rescue	OK	0.480388	0.219289	-1.13136	-3.0068	5e-05	0.000584007	yes	3.0068
XLOC_028241	XLOC_028241	FIBCD1	chr9:133777824-133814689	KO	Rescue	OK	8.93667	4.1976	-1.09017	-2.99468	5e-05	0.000584007	yes	2.99468
XLOC_017344	XLOC_017344	-	chr21:45238279-45239337	KO	Rescue	OK	0.520799	0.104695	-2.31454	-2.99254	0.0004	0.00371435	yes	2.99254
XLOC_026408	XLOC_026408	SDC2	chr8:97505881-97624037	KO	Rescue	OK	48.9247	35.4822	-0.463469	-2.99039	5e-05	0.000584007	yes	2.99039
XLOC_007827	XLOC_007827	PLEKHD1	chr14:69951470-69996662	KO	Rescue	OK	0.275773	0.04291	-2.6841	-2.99032	0.0002	0.00205279	yes	2.99032
XLOC_004221	XLOC_004221	PRR5L	chr11:36317724-36498243	KO	Rescue	OK	15.1632	7.473	-1.02081	-2.98571	5e-05	0.000584007	yes	2.98571
XLOC_009824	XLOC_009824	-	chr16:33963007-33964169	KO	Rescue	OK	313.765	437.65	0.480094	2.98447	5e-05	0.000584007	yes	2.98447
XLOC_005840	XLOC_005840	C12orf39	chr12:21679127-21685615	KO	Rescue	OK	0.770053	0.0485161	-3.98842	-2.98255	0.0001	0.00109908	yes	2.98255
XLOC_022258	XLOC_022258	BTN3A1	chr6:26402464-26415444	KO	Rescue	OK	2.81784	4.15237	0.559346	2.98069	5e-05	0.000584007	yes	2.98069
XLOC_026077	XLOC_026077	NCAPG2	chr7:158424002-158497544	KO	Rescue	OK	27.8874	38.4553	0.463568	2.98054	5e-05	0.000584007	yes	2.98054
XLOC_012848	XLOC_012848	NRTN	chr19:5805037-5828335	KO	Rescue	OK	1.59871	0.800318	-0.998263	-2.98021	5e-05	0.000584007	yes	2.98021
XLOC_014480	XLOC_014480	ZNF28	chr19:53300660-53324922	KO	Rescue	OK	1.8706	2.77357	0.568245	2.97947	5e-05	0.000584007	yes	2.97947
XLOC_009266	XLOC_009266	FOXB1	chr15:60291562-60299692	KO	Rescue	OK	0.0812185	0.249197	1.6174	2.97935	5e-05	0.000584007	yes	2.97935
XLOC_010091	XLOC_010091	TUBB3	chr16:89987575-90002507	KO	Rescue	OK	12.6864	8.83358	-0.522215	-2.97867	5e-05	0.000584007	yes	2.97867
XLOC_022814	XLOC_022814	-	chr6:154842449-154843483	KO	Rescue	OK	0.793678	0.240448	-1.72283	-2.97523	5e-05	0.000584007	yes	2.97523
XLOC_004203	XLOC_004203	CAT	chr11:34460471-34493607	KO	Rescue	OK	23.3447	32.376	0.47183	2.97283	5e-05	0.000584007	yes	2.97283
XLOC_005518	XLOC_005518	KDELC2	chr11:108342832-108369333	KO	Rescue	OK	13.2196	18.2977	0.468986	2.96441	5e-05	0.000584007	yes	2.96441
XLOC_006439	XLOC_006439	MFAP5	chr12:8798539-8815527	KO	Rescue	OK	4.52387	3.0607	-0.563695	-2.96277	5e-05	0.000584007	yes	2.96277
XLOC_017915	XLOC_017915	PPARA	chr22:46546376-46639653	KO	Rescue	OK	2.27267	1.59497	-0.510864	-2.96219	5e-05	0.000584007	yes	2.96219
XLOC_001286	XLOC_001286	-	chr1:207545130-207546698	KO	Rescue	OK	0.252161	0.664599	1.39814	2.96185	5e-05	0.000584007	yes	2.96185
XLOC_023476	XLOC_023476	PERP	chr6:138409641-138428660	KO	Rescue	OK	43.3833	31.5747	-0.45837	-2.96166	5e-05	0.000584007	yes	2.96166
XLOC_001303	XLOC_001303	HHAT	chr1:210501595-210849920	KO	Rescue	OK	0.761171	0.400058	-0.928013	-2.95659	5e-05	0.000584007	yes	2.95659
XLOC_009129	XLOC_009129	C15orf52	chr15:40623652-40633168	KO	Rescue	OK	3.21257	2.2059	-0.542361	-2.95479	5e-05	0.000584007	yes	2.95479
XLOC_004888	XLOC_004888	CARS	chr11:3022151-3078681	KO	Rescue	OK	21.3076	29.4695	0.467853	2.95025	5e-05	0.000584007	yes	2.95025
XLOC_007510	XLOC_007510	MYCBP2	chr13:77618791-77901224	KO	Rescue	OK	5.82274	8.291	0.509849	2.95022	5e-05	0.000584007	yes	2.95022
XLOC_015218	XLOC_015218	DLX1	chr2:172949147-172954402	KO	Rescue	OK	5.21247	7.55216	0.534921	2.94866	5e-05	0.000584007	yes	2.94866
XLOC_018339	XLOC_018339	TSEN2	chr3:12525930-12581270	KO	Rescue	OK	8.10158	11.5838	0.515829	2.9464	5e-05	0.000584007	yes	2.9464
XLOC_028901	XLOC_028901	ZNF185	chrX:152082985-152142025	KO	Rescue	OK	0.703394	1.21492	0.788457	2.94479	5e-05	0.000584007	yes	2.94479
XLOC_028158	XLOC_028158	STOM	chr9:124101265-124132582	KO	Rescue	OK	51.2136	37.2703	-0.458501	-2.94413	5e-05	0.000584007	yes	2.94413
XLOC_006134	XLOC_006134	-	chr12:88211538-88213879	KO	Rescue	OK	0.339098	0.11314	-1.58359	-2.94376	0.0001	0.00109908	yes	2.94376
XLOC_004363	XLOC_004363	TMEM132A	chr11:60691905-60719257	KO	Rescue	OK	14.8166	20.5002	0.468419	2.94336	5e-05	0.000584007	yes	2.94336
XLOC_021011	XLOC_021011	SNX18	chr5:53813588-53842416	KO	Rescue	OK	4.09252	2.86002	-0.516966	-2.94002	5e-05	0.000584007	yes	2.94002
XLOC_019372	XLOC_019372	EIF4E3	chr3:71728439-71804328	KO	Rescue	OK	0.645961	0.383813	-0.751044	-2.93923	5e-05	0.000584007	yes	2.93923
XLOC_007145	XLOC_007145	NHLRC3	chr13:39612434-39624244	KO	Rescue	OK	3.25919	4.88843	0.584859	2.93896	5e-05	0.000584007	yes	2.93896
XLOC_029044	XLOC_029044	DYNLT3	chrX:37698088-37706889	KO	Rescue	OK	22.6856	31.36	0.46715	2.93861	5e-05	0.000584007	yes	2.93861
XLOC_025591	XLOC_025591	-	chr7:44583693-44585213	KO	Rescue	OK	0.414792	0.0378373	-3.4545	-2.93858	0.00575	0.0334987	yes	2.93858
XLOC_028684	XLOC_028684	FAM133A	chrX:92929011-92967273	KO	Rescue	OK	0.201953	0.0324695	-2.63686	-2.9381	5e-05	0.000584007	yes	2.9381
XLOC_007690	XLOC_007690	NFATC4	chr14:24836144-24848810	KO	Rescue	OK	0.250055	0.103782	-1.26869	-2.93715	5e-05	0.000584007	yes	2.93715
XLOC_004086	XLOC_004086	SMPD1	chr11:6411643-6416228	KO	Rescue	OK	7.11864	4.91294	-0.535015	-2.93656	5e-05	0.000584007	yes	2.93656
XLOC_011011	XLOC_011011	LINC00672	chr17:37081420-37085637	KO	Rescue	OK	0.214184	0.0716933	-1.57894	-2.93199	0.0001	0.00109908	yes	2.93199
XLOC_010871	XLOC_010871	SLC47A1	chr17:19437134-19482346	KO	Rescue	OK	2.27005	3.38924	0.578239	2.93133	5e-05	0.000584007	yes	2.93133
XLOC_027201	XLOC_027201	DMRTA1	chr9:22301594-22452677	KO	Rescue	OK	1.89643	1.09789	-0.788557	-2.93117	5e-05	0.000584007	yes	2.93117
XLOC_027210	XLOC_027210	ACO1	chr9:32384600-32526364	KO	Rescue	OK	21.0742	14.8378	-0.506207	-2.93099	5e-05	0.000584007	yes	2.93099
XLOC_016244	XLOC_016244	GPR1	chr2:207040041-207082771	KO	Rescue	OK	0.716343	0.328925	-1.12289	-2.92421	5e-05	0.000584007	yes	2.92421
XLOC_006646	XLOC_006646	TFCP2	chr12:51487538-51566926	KO	Rescue	OK	18.0824	24.8609	0.459294	2.92205	5e-05	0.000584007	yes	2.92205
XLOC_001216	XLOC_001216	IGFN1	chr1:201159952-201198080	KO	Rescue	OK	0.329406	0.0327098	-3.33207	-2.92159	5e-05	0.000584007	yes	2.92159
XLOC_017826	XLOC_017826	H1F0	chr22:38201113-38203443	KO	Rescue	OK	9.28577	13.0721	0.493393	2.92126	5e-05	0.000584007	yes	2.92126
XLOC_020398	XLOC_020398	ABLIM2	chr4:7967036-8160559	KO	Rescue	OK	0.245738	0.0640411	-1.94005	-2.92083	5e-05	0.000584007	yes	2.92083
XLOC_010346	XLOC_010346	KCTD13	chr16:29911510-29937545	KO	Rescue	OK	1.17167	2.9406	1.32754	2.92052	5e-05	0.000584007	yes	2.92052
XLOC_022201	XLOC_022201	-	chr6:14212352-14214632	KO	Rescue	OK	0.242139	0.0582029	-2.05667	-2.91988	0.00045	0.00411481	yes	2.91988
XLOC_009238	XLOC_009238	FAM214A	chr15:52873517-52971495	KO	Rescue	OK	4.27757	2.96864	-0.526987	-2.91742	5e-05	0.000584007	yes	2.91742
XLOC_015287	XLOC_015287	GLS	chr2:191745520-191830273	KO	Rescue	OK	22.8383	16.6342	-0.457303	-2.91478	5e-05	0.000584007	yes	2.91478
XLOC_025952	XLOC_025952	AKR1B1	chr7:134127106-134143888	KO	Rescue	OK	122.75	89.7619	-0.451549	-2.91224	5e-05	0.000584007	yes	2.91224
XLOC_009763	XLOC_009763	MVP,PAGR1,PRRT2	chr16:29823408-29859451	KO	Rescue	OK	23.1329	16.6315	-0.476022	-2.91107	5e-05	0.000584007	yes	2.91107
XLOC_017809	XLOC_017809	APOL1	chr22:36649116-36663577	KO	Rescue	OK	0.484731	0.211686	-1.19526	-2.91027	5e-05	0.000584007	yes	2.91027
XLOC_011266	XLOC_011266	-	chr17:62468593-62470116	KO	Rescue	OK	0.517199	0.168212	-1.62044	-2.90924	5e-05	0.000584007	yes	2.90924
XLOC_012039	XLOC_012039	MIR3614,TRIM25	chr17:54965269-54991409	KO	Rescue	OK	19.1439	26.2807	0.457119	2.90763	5e-05	0.000584007	yes	2.90763
XLOC_005105	XLOC_005105	CKAP5	chr11:46765083-46867863	KO	Rescue	OK	40.6098	55.379	0.447511	2.90025	5e-05	0.000584007	yes	2.90025
XLOC_013961	XLOC_013961	C19orf57	chr19:13993167-14016909	KO	Rescue	OK	1.41927	2.26918	0.677023	2.90014	5e-05	0.000584007	yes	2.90014
XLOC_023237	XLOC_023237	TNFRSF21	chr6:47199267-47277680	KO	Rescue	OK	5.20629	7.3306	0.493675	2.89903	5e-05	0.000584007	yes	2.89903
XLOC_001028	XLOC_001028	-	chr1:159952738-159955119	KO	Rescue	OK	0.247511	0.0229088	-3.43352	-2.89733	0.00585	0.0338928	yes	2.89733
XLOC_019344	XLOC_019344	ACOX2	chr3:58490862-58522929	KO	Rescue	OK	0.258609	0.0206975	-3.64325	-2.89684	0.0032	0.020813	yes	2.89684
XLOC_005457	XLOC_005457	NAALAD2	chr11:89867817-89932581	KO	Rescue	OK	1.38329	2.07771	0.586898	2.89326	5e-05	0.000584007	yes	2.89326
XLOC_024902	XLOC_024902	LOC646999	chr7:39649085-39651687	KO	Rescue	OK	0.253471	0.0724545	-1.80668	-2.8931	5e-05	0.000584007	yes	2.8931
XLOC_000739	XLOC_000739	CTTNBP2NL	chr1:112938723-113005204	KO	Rescue	OK	9.9783	14.4846	0.537651	2.89209	5e-05	0.000584007	yes	2.89209
XLOC_008970	XLOC_008970	ISG20	chr15:89179470-89198879	KO	Rescue	OK	2.67506	1.34135	-0.995891	-2.89068	5e-05	0.000584007	yes	2.89068
XLOC_009741	XLOC_009741	IL4R	chr16:27325120-27376099	KO	Rescue	OK	2.88249	1.92216	-0.584584	-2.88771	5e-05	0.000584007	yes	2.88771
XLOC_022023	XLOC_022023	C1QTNF2	chr5:159774774-159797648	KO	Rescue	OK	0.348208	0.118675	-1.55293	-2.88742	5e-05	0.000584007	yes	2.88742
XLOC_002364	XLOC_002364	DPM3	chr1:155112365-155113044	KO	Rescue	OK	46.8678	31.6103	-0.568202	-2.88665	5e-05	0.000584007	yes	2.88665
XLOC_007812	XLOC_007812	FUT8	chr14:65877309-66210878	KO	Rescue	OK	4.58989	3.20886	-0.516401	-2.88162	5e-05	0.000584007	yes	2.88162
XLOC_010707	XLOC_010707	ZMYND15	chr17:4643309-4649414	KO	Rescue	OK	0.277303	0.0439393	-2.65788	-2.88026	5e-05	0.000584007	yes	2.88026
XLOC_026299	XLOC_026299	SDCBP	chr8:59465727-59495875	KO	Rescue	OK	210.387	154.181	-0.448418	-2.87955	5e-05	0.000584007	yes	2.87955
XLOC_022142	XLOC_022142	DUSP22	chr6:292030-351355	KO	Rescue	OK	7.61132	4.9683	-0.615394	-2.87947	5e-05	0.000584007	yes	2.87947
XLOC_024875	XLOC_024875	AQP1	chr7:30951414-30965131	KO	Rescue	OK	0.322676	0.0982416	-1.71568	-2.87886	5e-05	0.000584007	yes	2.87886
XLOC_005704	XLOC_005704	GPR162	chr12:6930962-6936583	KO	Rescue	OK	0.370646	0.106369	-1.80096	-2.87745	0.0001	0.00109908	yes	2.87745
XLOC_004979	XLOC_004979	SBF2	chr11:9776142-10315785	KO	Rescue	OK	6.17802	8.58787	0.475155	2.87605	5e-05	0.000584007	yes	2.87605
XLOC_005387	XLOC_005387	CHRDL2	chr11:74407472-74442186	KO	Rescue	OK	2.13001	0.882175	-1.27172	-2.87476	5e-05	0.000584007	yes	2.87476
XLOC_023099	XLOC_023099	GPSM3,NOTCH4	chr6:32158542-32191844	KO	Rescue	OK	1.2326	0.604769	-1.02725	-2.87473	5e-05	0.000584007	yes	2.87473
XLOC_011916	XLOC_011916	RUNDC3A	chr17:42376783-42396038	KO	Rescue	OK	0.547864	0.0934599	-2.5514	-2.87322	5e-05	0.000584007	yes	2.87322
XLOC_001997	XLOC_001997	NEGR1	chr1:71868624-72748277	KO	Rescue	OK	0.124295	0.260324	1.06654	2.87305	5e-05	0.000584007	yes	2.87305
XLOC_010071	XLOC_010071	ZNF778	chr16:89284099-89304209	KO	Rescue	OK	7.07804	4.75774	-0.573072	-2.87268	5e-05	0.000584007	yes	2.87268
XLOC_012899	XLOC_012899	ZNF177,ZNF559,ZNF559-ZNF177	chr19:9434447-9493293	KO	Rescue	OK	1.29376	2.05746	0.669296	2.87237	5e-05	0.000584007	yes	2.87237
XLOC_011395	XLOC_011395	-	chr17:79340144-79348516	KO	Rescue	OK	1.12844	0.490827	-1.20105	-2.87175	5e-05	0.000584007	yes	2.87175
XLOC_015273	XLOC_015273	ITGAV	chr2:187454789-187545628	KO	Rescue	OK	24.5021	17.9996	-0.444939	-2.87016	5e-05	0.000584007	yes	2.87016
XLOC_010798	XLOC_010798	GLP2R	chr17:9729380-9797544	KO	Rescue	OK	19.3847	28.0109	0.531074	2.86946	5e-05	0.000584007	yes	2.86946
XLOC_008692	XLOC_008692	CHP1	chr15:41523436-41574083	KO	Rescue	OK	103.882	76.3045	-0.44511	-2.86941	5e-05	0.000584007	yes	2.86941
XLOC_004331	XLOC_004331	CNTF,ZFP91,ZFP91-CNTF	chr11:58345814-58398974	KO	Rescue	OK	36.9328	50.4701	0.450523	2.86922	5e-05	0.000584007	yes	2.86922
XLOC_015902	XLOC_015902	ASTL	chr2:96787490-96804175	KO	Rescue	OK	0.303456	0.039729	-2.93322	-2.86902	0.0001	0.00109908	yes	2.86902
XLOC_019105	XLOC_019105	CAND2	chr3:12838170-12876313	KO	Rescue	OK	0.0835444	0.384306	2.20164	2.86641	0.00015	0.00158822	yes	2.86641
XLOC_026933	XLOC_026933	ANKRD46	chr8:101521979-101572014	KO	Rescue	OK	7.77545	5.46679	-0.508232	-2.86433	5e-05	0.000584007	yes	2.86433
XLOC_009465	XLOC_009465	AP3S2,C15orf38,C15orf38-AP3S2	chr15:90373781-90456232	KO	Rescue	OK	13.9982	19.8535	0.504158	2.86407	5e-05	0.000584007	yes	2.86407
XLOC_023380	XLOC_023380	BEND3	chr6:107386384-107437314	KO	Rescue	OK	5.05603	7.00094	0.469544	2.86342	5e-05	0.000584007	yes	2.86342
XLOC_011844	XLOC_011844	KRT16	chr17:39766030-39769181	KO	Rescue	OK	0.791455	0.327323	-1.27379	-2.86324	5e-05	0.000584007	yes	2.86324
XLOC_028043	XLOC_028043	PTCH1	chr9:98205263-98279247	KO	Rescue	OK	1.45611	2.15898	0.568227	2.86175	5e-05	0.000584007	yes	2.86175
XLOC_013656	XLOC_013656	ZNF274	chr19:58694395-58724927	KO	Rescue	OK	5.41536	7.66775	0.501745	2.85825	5e-05	0.000584007	yes	2.85825
XLOC_003213	XLOC_003213	IFIT1	chr10:91152302-91166244	KO	Rescue	OK	4.55273	3.19832	-0.509417	-2.858	5e-05	0.000584007	yes	2.858
XLOC_019916	XLOC_019916	PI4K2B	chr4:25235582-25281754	KO	Rescue	OK	11.002	7.94472	-0.469696	-2.85317	5e-05	0.000584007	yes	2.85317
XLOC_012344	XLOC_012344	-	chr18:10598807-10606663	KO	Rescue	OK	0.692257	0.13035	-2.40891	-2.85258	5e-05	0.000584007	yes	2.85258
XLOC_004129	XLOC_004129	TEAD1	chr11:12695550-12966560	KO	Rescue	OK	43.9995	59.9625	0.446574	2.85079	5e-05	0.000584007	yes	2.85079
XLOC_002367	XLOC_002367	THBS3	chr1:155165378-155177772	KO	Rescue	OK	2.37424	1.56334	-0.602831	-2.84863	5e-05	0.000584007	yes	2.84863
XLOC_015071	XLOC_015071	MARCO	chr2:119699744-119752236	KO	Rescue	OK	0.303718	0.0416501	-2.86634	-2.84635	0.0014	0.0107001	yes	2.84635
XLOC_023413	XLOC_023413	BET3L	chr6:116816183-116880031	KO	Rescue	OK	0.456928	0.1299	-1.81456	-2.84495	0.00015	0.00158822	yes	2.84495
XLOC_025090	XLOC_025090	FZD1	chr7:90893782-90898132	KO	Rescue	OK	1.24939	0.792831	-0.656142	-2.84418	5e-05	0.000584007	yes	2.84418
XLOC_016915	XLOC_016915	BFSP1	chr20:17474549-17539605	KO	Rescue	OK	1.20318	0.656951	-0.872996	-2.84269	5e-05	0.000584007	yes	2.84269
XLOC_002096	XLOC_002096	-	chr1:109099515-109101392	KO	Rescue	OK	0.240365	0.0379451	-2.66324	-2.84099	0.0012	0.00939869	yes	2.84099
XLOC_020114	XLOC_020114	HERC5	chr4:89377875-89427320	KO	Rescue	OK	7.92932	5.68194	-0.480813	-2.83983	5e-05	0.000584007	yes	2.83983
XLOC_027988	XLOC_027988	AGTPBP1	chr9:88161370-88356958	KO	Rescue	OK	7.30074	5.26411	-0.471852	-2.83938	5e-05	0.000584007	yes	2.83938
XLOC_020172	XLOC_020172	UGT8	chr4:115519503-115599300	KO	Rescue	OK	13.1657	18.0701	0.456816	2.8365	5e-05	0.000584007	yes	2.8365
XLOC_025594	XLOC_025594	-	chr7:44593963-44595552	KO	Rescue	OK	0.334616	0.0674963	-2.30963	-2.83633	0.0006	0.00527906	yes	2.83633
XLOC_005841	XLOC_005841	CMAS	chr12:22199109-22218606	KO	Rescue	OK	28.7139	20.8994	-0.458282	-2.83465	5e-05	0.000584007	yes	2.83465
XLOC_014142	XLOC_014142	ZNF566	chr19:36936020-36982613	KO	Rescue	OK	2.2863	3.6909	0.690961	2.83355	5e-05	0.000584007	yes	2.83355
XLOC_011176	XLOC_011176	DLX4	chr17:48045808-48052323	KO	Rescue	OK	5.40114	3.61889	-0.577716	-2.82971	5e-05	0.000584007	yes	2.82971
XLOC_017895	XLOC_017895	PARVB	chr22:44395090-44565627	KO	Rescue	OK	23.7685	32.6524	0.458136	2.82763	5e-05	0.000584007	yes	2.82763
XLOC_004214	XLOC_004214	-	chr11:35036217-35040326	KO	Rescue	OK	0.138175	0.306417	1.149	2.82759	5e-05	0.000584007	yes	2.82759
XLOC_011378	XLOC_011378	GAA	chr17:78075354-78093679	KO	Rescue	OK	9.86111	13.5425	0.457676	2.82755	5e-05	0.000584007	yes	2.82755
XLOC_005964	XLOC_005964	-	chr12:52644878-52649985	KO	Rescue	OK	0.628329	0.367644	-0.773213	-2.82724	5e-05	0.000584007	yes	2.82724
XLOC_027766	XLOC_027766	BNC2	chr9:16409500-16870793	KO	Rescue	OK	2.02604	1.45136	-0.481257	-2.82517	5e-05	0.000584007	yes	2.82517
XLOC_012202	XLOC_012202	CYTH1	chr17:76670129-76778376	KO	Rescue	OK	16.9452	23.099	0.44695	2.82349	5e-05	0.000584007	yes	2.82349
XLOC_007021	XLOC_007021	ABCB9	chr12:123405497-123451056	KO	Rescue	OK	4.53656	3.11675	-0.541556	-2.82224	5e-05	0.000584007	yes	2.82224
XLOC_013560	XLOC_013560	LILRA6,LILRB3	chr19:54720146-54746724	KO	Rescue	OK	1.5507	0.510884	-1.60186	-2.82122	5e-05	0.000584007	yes	2.82122
XLOC_005499	XLOC_005499	CASP4	chr11:104813593-104839325	KO	Rescue	OK	3.53926	5.43505	0.618848	2.81518	5e-05	0.000584007	yes	2.81518
XLOC_012740	XLOC_012740	HCN2	chr19:589892-617159	KO	Rescue	OK	13.4262	9.77915	-0.457273	-2.81327	5e-05	0.000584007	yes	2.81327
XLOC_006640	XLOC_006640	LIMA1	chr12:50569552-50677353	KO	Rescue	OK	167.324	123.235	-0.441225	-2.80605	5e-05	0.000584007	yes	2.80605
XLOC_028770	XLOC_028770	DOCK11	chrX:117629573-117820150	KO	Rescue	OK	2.55732	1.79682	-0.509186	-2.80546	5e-05	0.000584007	yes	2.80546
XLOC_013429	XLOC_013429	ADM5,PRMT1	chr19:50180221-50194247	KO	Rescue	OK	151.572	205.548	0.439471	2.80477	5e-05	0.000584007	yes	2.80477
XLOC_012313	XLOC_012313	NDC80	chr18:2537523-2616634	KO	Rescue	OK	36.6074	25.8745	-0.500602	-2.80409	5e-05	0.000584007	yes	2.80409
XLOC_025058	XLOC_025058	DTX2	chr7:76090971-76135355	KO	Rescue	OK	6.00336	4.18582	-0.520259	-2.80258	5e-05	0.000584007	yes	2.80258
XLOC_027565	XLOC_027565	PHYHD1	chr9:131683173-131704320	KO	Rescue	OK	13.0371	8.99532	-0.535377	-2.80113	5e-05	0.000584007	yes	2.80113
XLOC_022126	XLOC_022126	GFPT2	chr5:179727699-179780315	KO	Rescue	OK	2.48995	1.64338	-0.59945	-2.79905	5e-05	0.000584007	yes	2.79905
XLOC_016900	XLOC_016900	FERMT1	chr20:6055491-6104253	KO	Rescue	OK	8.76624	11.9576	0.447893	2.7984	5e-05	0.000584007	yes	2.7984
XLOC_023314	XLOC_023314	PHIP	chr6:79644135-79788011	KO	Rescue	OK	13.1264	17.7248	0.433296	2.79839	5e-05	0.000584007	yes	2.79839
XLOC_004132	XLOC_004132	FAR1	chr11:13690205-13753893	KO	Rescue	OK	25.1549	33.9471	0.432449	2.79407	5e-05	0.000584007	yes	2.79407
XLOC_000768	XLOC_000768	MAB21L3	chr1:116654035-116677861	KO	Rescue	OK	1.57036	0.994975	-0.658367	-2.79365	5e-05	0.000584007	yes	2.79365
XLOC_000291	XLOC_000291	RAB42	chr1:28918689-28923161	KO	Rescue	OK	18.9273	12.4592	-0.603254	-2.79265	5e-05	0.000584007	yes	2.79265
XLOC_011863	XLOC_011863	STAT3	chr17:40465342-40540582	KO	Rescue	OK	49.6399	36.6906	-0.436091	-2.79259	5e-05	0.000584007	yes	2.79259
XLOC_017277	XLOC_017277	CBR1	chr21:37441939-37498938	KO	Rescue	OK	49.735	67.5788	0.44231	2.79131	5e-05	0.000584007	yes	2.79131
XLOC_026289	XLOC_026289	LYN	chr8:56792385-56925006	KO	Rescue	OK	13.9029	18.8756	0.441144	2.78998	5e-05	0.000584007	yes	2.78998
XLOC_023618	XLOC_023618	-	chr6:170470757-170475686	KO	Rescue	OK	0.597142	1.40427	1.23367	2.7898	5e-05	0.000584007	yes	2.7898
XLOC_005202	XLOC_005202	MIR611,TMEM258	chr11:61556601-61560085	KO	Rescue	OK	194.781	264.889	0.443532	2.78971	5e-05	0.000584007	yes	2.78971
XLOC_021142	XLOC_021142	RHOBTB3	chr5:95066849-95132071	KO	Rescue	OK	28.9724	21.4744	-0.43206	-2.78102	5e-05	0.000584007	yes	2.78102
XLOC_006359	XLOC_006359	FBRSL1	chr12:133066709-133161773	KO	Rescue	OK	23.3508	31.6564	0.439026	2.7807	5e-05	0.000584007	yes	2.7807
XLOC_015936	XLOC_015936	SNORD89	chr2:101887504-101891922	KO	Rescue	OK	3.53979	5.86796	0.729197	2.77747	0.0004	0.00371435	yes	2.77747
XLOC_005053	XLOC_005053	LIN7C	chr11:27510014-27528355	KO	Rescue	OK	21.8758	29.507	0.431722	2.77696	5e-05	0.000584007	yes	2.77696
XLOC_017729	XLOC_017729	ADRBK2	chr22:25916674-26125258	KO	Rescue	OK	0.284295	0.161735	-0.813757	-2.77221	5e-05	0.000584007	yes	2.77221
XLOC_013285	XLOC_013285	ZNF155	chr19:44488321-44502733	KO	Rescue	OK	1.23242	1.94068	0.655069	2.77203	5e-05	0.000584007	yes	2.77203
XLOC_026019	XLOC_026019	PDIA4	chr7:148700153-148725782	KO	Rescue	OK	58.9578	79.2919	0.42749	2.76591	5e-05	0.000584007	yes	2.76591
XLOC_001085	XLOC_001085	-	chr1:165897102-165899397	KO	Rescue	OK	0.252656	0.072827	-1.79463	-2.76401	0.0003	0.00290318	yes	2.76401
XLOC_004188	XLOC_004188	RCN1	chr11:32112476-32127272	KO	Rescue	OK	184.328	248.62	0.431671	2.76363	5e-05	0.000584007	yes	2.76363
XLOC_005768	XLOC_005768	TMEM52B	chr12:10324824-10344589	KO	Rescue	OK	7.7489	5.5308	-0.486503	-2.76319	5e-05	0.000584007	yes	2.76319
XLOC_026319	XLOC_026319	ADHFE1	chr8:67344717-67381044	KO	Rescue	OK	0.266312	0.0753723	-1.82101	-2.76301	0.0003	0.00290318	yes	2.76301
XLOC_025680	XLOC_025680	-	chr7:66384613-66386050	KO	Rescue	OK	0.3273	0.0756124	-2.11392	-2.76122	0.001	0.00809319	yes	2.76122
XLOC_023325	XLOC_023325	ME1	chr6:83920109-84140938	KO	Rescue	OK	15.0455	20.374	0.437398	2.75997	5e-05	0.000584007	yes	2.75997
XLOC_005394	XLOC_005394	KLHL35	chr11:75133435-75141674	KO	Rescue	OK	1.89298	2.95543	0.642706	2.75915	5e-05	0.000584007	yes	2.75915
XLOC_017871	XLOC_017871	CSDC2	chr22:41957013-41972670	KO	Rescue	OK	0.520157	0.934748	0.845631	2.7549	5e-05	0.000584007	yes	2.7549
XLOC_019670	XLOC_019670	GNB4	chr3:179112443-179169371	KO	Rescue	OK	30.1032	40.4643	0.426734	2.75485	5e-05	0.000584007	yes	2.75485
XLOC_021338	XLOC_021338	PCYOX1L	chr5:148737569-148749221	KO	Rescue	OK	2.31275	1.48001	-0.644004	-2.75429	5e-05	0.000584007	yes	2.75429
XLOC_017579	XLOC_017579	ICOSLG	chr21:45642583-45661330	KO	Rescue	OK	6.00909	8.54516	0.50796	2.75309	5e-05	0.000584007	yes	2.75309
XLOC_017976	XLOC_017976	CECR6	chr22:17597188-17602257	KO	Rescue	OK	0.297176	0.109019	-1.44674	-2.75138	5e-05	0.000584007	yes	2.75138
XLOC_004112	XLOC_004112	IPO7	chr11:9406168-9469674	KO	Rescue	OK	97.4314	131.671	0.434481	2.75077	5e-05	0.000584007	yes	2.75077
XLOC_000425	XLOC_000425	B4GALT2	chr1:44444671-44456843	KO	Rescue	OK	31.0785	42.0389	0.435807	2.75033	5e-05	0.000584007	yes	2.75033
XLOC_003533	XLOC_003533	PIP4K2A	chr10:22823765-23003503	KO	Rescue	OK	12.6038	9.25991	-0.444785	-2.74979	5e-05	0.000584007	yes	2.74979
XLOC_007165	XLOC_007165	-	chr13:44884940-44896813	KO	Rescue	OK	0.774433	0.498031	-0.636905	-2.74886	5e-05	0.000584007	yes	2.74886
XLOC_006333	XLOC_006333	-	chr12:125537953-125540556	KO	Rescue	OK	0.228021	0.492209	1.1101	2.74685	5e-05	0.000584007	yes	2.74685
XLOC_005505	XLOC_005505	-	chr11:105869257-105876078	KO	Rescue	OK	0.166607	0.304795	0.871387	2.7467	5e-05	0.000584007	yes	2.7467
XLOC_022549	XLOC_022549	BAG2	chr6:57037103-57050012	KO	Rescue	OK	48.4304	65.1233	0.42726	2.74583	5e-05	0.000584007	yes	2.74583
XLOC_023567	XLOC_023567	-	chr6:166209860-166214876	KO	Rescue	OK	0.132358	0.27507	1.05536	2.74572	5e-05	0.000584007	yes	2.74572
XLOC_018057	XLOC_018057	GGT5	chr22:24615063-24641160	KO	Rescue	OK	1.63814	1.00753	-0.701239	-2.73896	5e-05	0.000584007	yes	2.73896
XLOC_024911	XLOC_024911	STK17A	chr7:43622681-43769333	KO	Rescue	OK	11.2693	6.57639	-0.777028	-2.7373	5e-05	0.000584007	yes	2.7373
XLOC_025720	XLOC_025720	STYXL1	chr7:75625654-75677321	KO	Rescue	OK	8.77612	5.99468	-0.5499	-2.7364	5e-05	0.000584007	yes	2.7364
XLOC_005567	XLOC_005567	-	chr11:118587654-118600624	KO	Rescue	OK	0.376619	0.236523	-0.671122	-2.73546	5e-05	0.000584007	yes	2.73546
XLOC_008787	XLOC_008787	FAM81A	chr15:59730371-59815751	KO	Rescue	OK	14.1659	10.4302	-0.441657	-2.73508	5e-05	0.000584007	yes	2.73508
XLOC_013800	XLOC_013800	DUS3L,PRR22	chr19:5782969-5791249	KO	Rescue	OK	18.4203	25.1852	0.451279	2.735	5e-05	0.000584007	yes	2.735
XLOC_001871	XLOC_001871	ERI3	chr1:44686741-44821052	KO	Rescue	OK	30.0795	40.8143	0.440296	2.7339	5e-05	0.000584007	yes	2.7339
XLOC_021834	XLOC_021834	ALDH7A1	chr5:125877532-125931082	KO	Rescue	OK	24.8542	18.5047	-0.425601	-2.73255	5e-05	0.000584007	yes	2.73255
XLOC_014320	XLOC_014320	-	chr19:46692360-46706454	KO	Rescue	OK	3.90051	1.73412	-1.16946	-2.73225	5e-05	0.000584007	yes	2.73225
XLOC_000427	XLOC_000427	KLF17	chr1:44510495-44601163	KO	Rescue	OK	2.40642	4.39863	0.870168	2.73186	5e-05	0.000584007	yes	2.73186
XLOC_025412	XLOC_025412	NOM1	chr7:156742416-156765876	KO	Rescue	OK	7.75827	10.4872	0.434826	2.73046	5e-05	0.000584007	yes	2.73046
XLOC_008478	XLOC_008478	HSP90AA1	chr14:102547074-102606086	KO	Rescue	OK	674.986	941.814	0.480586	2.73	5e-05	0.000584007	yes	2.73
XLOC_009015	XLOC_009015	MCTP2	chr15:94774393-95027181	KO	Rescue	OK	3.90169	2.73252	-0.513866	-2.72822	5e-05	0.000584007	yes	2.72822
XLOC_020643	XLOC_020643	SLC9B1,SLC9B2	chr4:103790134-103998170	KO	Rescue	OK	5.05162	8.5911	0.766096	2.72623	5e-05	0.000584007	yes	2.72623
XLOC_008071	XLOC_008071	EXOC3L4	chr14:103566480-103577202	KO	Rescue	OK	0.747783	0.374364	-0.998177	-2.72609	5e-05	0.000584007	yes	2.72609
XLOC_028050	XLOC_028050	CDC14B	chr9:99262394-99382152	KO	Rescue	OK	1.75413	2.50562	0.514408	2.72591	5e-05	0.000584007	yes	2.72591
XLOC_022614	XLOC_022614	POU3F2	chr6:99282579-99286666	KO	Rescue	OK	0.199734	0.391667	0.971546	2.72467	5e-05	0.000584007	yes	2.72467
XLOC_004105	XLOC_004105	RPL27A	chr11:8633452-8711419	KO	Rescue	OK	155.43	210.807	0.439659	2.72394	5e-05	0.000584007	yes	2.72394
XLOC_028073	XLOC_028073	CORO2A	chr9:100883256-100954956	KO	Rescue	OK	2.0184	2.85077	0.498142	2.7234	5e-05	0.000584007	yes	2.7234
XLOC_001591	XLOC_001591	FBXO2	chr1:11708417-11723386	KO	Rescue	OK	27.8328	19.6356	-0.503315	-2.72319	5e-05	0.000584007	yes	2.72319
XLOC_026884	XLOC_026884	-	chr8:90598098-90600270	KO	Rescue	OK	0.504722	0.220434	-1.19514	-2.72204	5e-05	0.000584007	yes	2.72204
XLOC_023516	XLOC_023516	ZBTB2	chr6:151685247-151712858	KO	Rescue	OK	8.87686	12.1083	0.447873	2.72013	5e-05	0.000584007	yes	2.72013
XLOC_004245	XLOC_004245	SLC35C1	chr11:45825622-45834567	KO	Rescue	OK	5.76271	7.92816	0.460239	2.71909	5e-05	0.000584007	yes	2.71909
XLOC_023384	XLOC_023384	OSTM1	chr6:108362612-108395941	KO	Rescue	OK	10.4546	7.70392	-0.440467	-2.71904	5e-05	0.000584007	yes	2.71904
XLOC_002122	XLOC_002122	LRIF1	chr1:111489567-111506698	KO	Rescue	OK	3.88045	5.75706	0.569107	2.71819	5e-05	0.000584007	yes	2.71819
XLOC_029466	XLOC_029466	L1CAM	chrX:153126851-153151942	KO	Rescue	OK	79.8535	59.605	-0.421922	-2.71553	5e-05	0.000584007	yes	2.71553
XLOC_006418	XLOC_006418	C1R	chr12:7187514-7245043	KO	Rescue	OK	1.9486	1.22324	-0.671736	-2.71533	5e-05	0.000584007	yes	2.71533
XLOC_015903	XLOC_015903	DUSP2	chr2:96808907-96811179	KO	Rescue	OK	16.7773	12.1851	-0.461387	-2.71009	5e-05	0.000584007	yes	2.71009
XLOC_029280	XLOC_029280	RNU6-28	chrX:110537006-110664835	KO	Rescue	OK	2051.36	984.756	-1.05874	-2.70964	5e-05	0.000584007	yes	2.70964
XLOC_003094	XLOC_003094	MYPN	chr10:69864710-69983338	KO	Rescue	OK	41.1986	30.2781	-0.444322	-2.70825	5e-05	0.000584007	yes	2.70825
XLOC_021439	XLOC_021439	UNC5A	chr5:176237448-176326333	KO	Rescue	OK	1.39416	0.878116	-0.666914	-2.70697	5e-05	0.000584007	yes	2.70697
XLOC_016682	XLOC_016682	PI3	chr20:43803539-43805185	KO	Rescue	OK	3.70763	1.85848	-0.996374	-2.70606	5e-05	0.000584007	yes	2.70606
XLOC_023473	XLOC_023473	IFNGR1	chr6:137518620-137540567	KO	Rescue	OK	14.1832	10.3377	-0.456271	-2.70604	0.0001	0.00109908	yes	2.70604
XLOC_020206	XLOC_020206	PLK4	chr4:128802015-128820377	KO	Rescue	OK	7.52722	10.2579	0.446544	2.70562	5e-05	0.000584007	yes	2.70562
XLOC_008846	XLOC_008846	THSD4	chr15:71402582-72075722	KO	Rescue	OK	1.85828	1.32622	-0.48665	-2.70528	5e-05	0.000584007	yes	2.70528
XLOC_023315	XLOC_023315	HMGN3	chr6:79910961-79946517	KO	Rescue	OK	69.2257	93.5133	0.433863	2.70271	5e-05	0.000584007	yes	2.70271
XLOC_026239	XLOC_026239	LETM2	chr8:38243958-38266611	KO	Rescue	OK	0.579037	0.217964	-1.40956	-2.70128	5e-05	0.000584007	yes	2.70128
XLOC_016804	XLOC_016804	BIRC7	chr20:61866759-61871864	KO	Rescue	OK	0.729942	0.315465	-1.2103	-2.69933	5e-05	0.000584007	yes	2.69933
XLOC_026553	XLOC_026553	GRINA	chr8:145064225-145067583	KO	Rescue	OK	112.364	84.1527	-0.417096	-2.69929	5e-05	0.000584007	yes	2.69929
XLOC_023580	XLOC_023580	-	chr6:166262656-166273762	KO	Rescue	OK	0.240263	0.382279	0.670012	2.69921	5e-05	0.000584007	yes	2.69921
XLOC_022758	XLOC_022758	HEBP2	chr6:138725335-138737471	KO	Rescue	OK	10.4623	7.3217	-0.514943	-2.69903	5e-05	0.000584007	yes	2.69903
XLOC_007705	XLOC_007705	G2E3	chr14:31028328-31089046	KO	Rescue	OK	4.63216	6.30977	0.445901	2.69814	5e-05	0.000584007	yes	2.69814
XLOC_003116	XLOC_003116	UNC5B	chr10:72972291-73062635	KO	Rescue	OK	2.18933	1.54592	-0.502028	-2.69783	5e-05	0.000584007	yes	2.69783
XLOC_027487	XLOC_027487	PAPPA	chr9:118916070-119164600	KO	Rescue	OK	5.86684	4.35692	-0.429276	-2.69733	5e-05	0.000584007	yes	2.69733
XLOC_014848	XLOC_014848	ANXA4	chr2:69969126-70053596	KO	Rescue	OK	38.0155	28.2882	-0.42639	-2.69706	5e-05	0.000584007	yes	2.69706
XLOC_009595	XLOC_009595	PRSS30P	chr16:2885641-2892752	KO	Rescue	OK	0.922625	0.431821	-1.09531	-2.69702	5e-05	0.000584007	yes	2.69702
XLOC_011920	XLOC_011920	FAM171A2	chr17:42431100-42441235	KO	Rescue	OK	4.67663	3.26581	-0.518027	-2.69702	5e-05	0.000584007	yes	2.69702
XLOC_018276	XLOC_018276	DENND6B	chr22:50750087-50765489	KO	Rescue	OK	0.868326	0.446318	-0.960166	-2.69689	5e-05	0.000584007	yes	2.69689
XLOC_002063	XLOC_002063	ABCA4	chr1:94458393-94586705	KO	Rescue	OK	0.303413	0.170769	-0.829232	-2.69543	5e-05	0.000584007	yes	2.69543
XLOC_020694	XLOC_020694	ANXA5	chr4:122589151-122618147	KO	Rescue	OK	223.274	167.25	-0.416809	-2.69471	5e-05	0.000584007	yes	2.69471
XLOC_007589	XLOC_007589	-	chr13:109871426-109888512	KO	Rescue	OK	0.255711	0.384008	0.586623	2.69446	5e-05	0.000584007	yes	2.69446
XLOC_026909	XLOC_026909	TP53INP1	chr8:95938199-95961615	KO	Rescue	OK	0.57868	0.347461	-0.735916	-2.69288	5e-05	0.000584007	yes	2.69288
XLOC_001779	XLOC_001779	TRIM62	chr1:33611002-33647671	KO	Rescue	OK	2.61207	1.80136	-0.536102	-2.69237	5e-05	0.000584007	yes	2.69237
XLOC_013919	XLOC_013919	ELOF1	chr19:11663857-11670051	KO	Rescue	OK	67.479	50.0892	-0.429938	-2.69166	5e-05	0.000584007	yes	2.69166
XLOC_006746	XLOC_006746	MYO1A	chr12:57417532-57444549	KO	Rescue	OK	3.23418	2.23111	-0.535639	-2.69118	5e-05	0.000584007	yes	2.69118
XLOC_026023	XLOC_026023	ZNF777	chr7:149128453-149158053	KO	Rescue	OK	7.23996	9.8804	0.448588	2.68996	5e-05	0.000584007	yes	2.68996
XLOC_014896	XLOC_014896	-	chr2:75503696-75506851	KO	Rescue	OK	0.564167	0.229453	-1.29792	-2.68975	0.00015	0.00158822	yes	2.68975
XLOC_001299	XLOC_001299	SERTAD4	chr1:210404803-210420157	KO	Rescue	OK	9.95077	6.89613	-0.529022	-2.68963	5e-05	0.000584007	yes	2.68963
XLOC_018590	XLOC_018590	FLNB	chr3:57994094-58158136	KO	Rescue	OK	38.6193	28.9453	-0.41599	-2.68932	5e-05	0.000584007	yes	2.68932
XLOC_001728	XLOC_001728	IFI6	chr1:27992571-27998724	KO	Rescue	OK	3.82471	2.22223	-0.783343	-2.6887	5e-05	0.000584007	yes	2.6887
XLOC_028739	XLOC_028739	MID2	chrX:107069083-107174867	KO	Rescue	OK	0.39128	0.173046	-1.17704	-2.68828	5e-05	0.000584007	yes	2.68828
XLOC_007873	XLOC_007873	FLVCR2	chr14:76044939-76114512	KO	Rescue	OK	2.5473	1.74813	-0.54316	-2.68679	5e-05	0.000584007	yes	2.68679
XLOC_029350	XLOC_029350	LOC286467	chrX:130823789-130964708	KO	Rescue	OK	1.99545	3.00483	0.590569	2.6866	5e-05	0.000584007	yes	2.6866
XLOC_011775	XLOC_011775	STAC2	chr17:37366788-37382040	KO	Rescue	OK	1.29977	0.818556	-0.667098	-2.68633	5e-05	0.000584007	yes	2.68633
XLOC_015553	XLOC_015553	MBOAT2	chr2:8992852-9144035	KO	Rescue	OK	1.78701	1.17541	-0.604383	-2.6861	5e-05	0.000584007	yes	2.6861
XLOC_002336	XLOC_002336	S100A3,S100A4	chr1:153516088-153525365	KO	Rescue	OK	524.181	701.02	0.419392	2.68491	5e-05	0.000584007	yes	2.68491
XLOC_009105	XLOC_009105	LPCAT4	chr15:34651088-34659893	KO	Rescue	OK	7.56897	10.5512	0.479242	2.68357	5e-05	0.000584007	yes	2.68357
XLOC_004712	XLOC_004712	-	chr11:112160963-112162455	KO	Rescue	OK	0.984471	0.30859	-1.67366	-2.6818	0.0002	0.00205279	yes	2.6818
XLOC_007125	XLOC_007125	FRY	chr13:32605436-32870776	KO	Rescue	OK	0.225815	0.129695	-0.800016	-2.68163	5e-05	0.000584007	yes	2.68163
XLOC_011088	XLOC_011088	-	chr17:41381678-41382351	KO	Rescue	OK	0.602557	1.5542	1.367	2.67985	5e-05	0.000584007	yes	2.67985
XLOC_001154	XLOC_001154	FLJ23867,QSOX1	chr1:180123947-180169927	KO	Rescue	OK	19.2495	14.1765	-0.441321	-2.67715	5e-05	0.000584007	yes	2.67715
XLOC_011557	XLOC_011557	HES7	chr17:8023907-8027410	KO	Rescue	OK	4.58275	6.61013	0.528464	2.67703	5e-05	0.000584007	yes	2.67703
XLOC_019800	XLOC_019800	MAEA	chr4:1283573-1333927	KO	Rescue	OK	22.8395	30.7168	0.427501	2.67314	5e-05	0.000584007	yes	2.67314
XLOC_011446	XLOC_011446	ABR	chr17:906757-1090616	KO	Rescue	OK	15.656	11.6864	-0.421878	-2.673	5e-05	0.000584007	yes	2.673
XLOC_005196	XLOC_005196	VWCE	chr11:61025675-61062788	KO	Rescue	OK	0.607483	0.29454	-1.04438	-2.67151	5e-05	0.000584007	yes	2.67151
XLOC_026044	XLOC_026044	ABCF2	chr7:150904922-150924469	KO	Rescue	OK	44.364	59.8797	0.432678	2.6707	5e-05	0.000584007	yes	2.6707
XLOC_015284	XLOC_015284	INPP1	chr2:191208195-191236391	KO	Rescue	OK	2.41815	1.52386	-0.666171	-2.66979	5e-05	0.000584007	yes	2.66979
XLOC_003334	XLOC_003334	SFR1	chr10:105879925-105886143	KO	Rescue	OK	4.96688	3.30295	-0.588584	-2.6695	5e-05	0.000584007	yes	2.6695
XLOC_020283	XLOC_020283	CPE	chr4:166300096-166419482	KO	Rescue	OK	0.501174	0.233899	-1.09942	-2.66829	5e-05	0.000584007	yes	2.66829
XLOC_018762	XLOC_018762	CHST13	chr3:126243130-126262134	KO	Rescue	OK	0.515988	0.212038	-1.28302	-2.66773	0.00025	0.00247504	yes	2.66773
XLOC_010217	XLOC_010217	PPL	chr16:4932507-4987136	KO	Rescue	OK	5.27837	3.87965	-0.444167	-2.66671	5e-05	0.000584007	yes	2.66671
XLOC_007009	XLOC_007009	HPD	chr12:122277432-122326517	KO	Rescue	OK	219.626	164.924	-0.413253	-2.66534	5e-05	0.000584007	yes	2.66534
XLOC_019380	XLOC_019380	ZNF717	chr3:75779120-75834726	KO	Rescue	OK	0.912996	1.81155	0.988546	2.66172	5e-05	0.000584007	yes	2.66172
XLOC_023321	XLOC_023321	FAM46A	chr6:82455305-82462505	KO	Rescue	OK	20.0986	26.7383	0.411808	2.65685	5e-05	0.000584007	yes	2.65685
XLOC_018301	XLOC_018301	LMCD1	chr3:8543510-8609806	KO	Rescue	OK	0.392919	0.132498	-1.56826	-2.6561	0.0003	0.00290318	yes	2.6561
XLOC_002031	XLOC_002031	ZNHIT6	chr1:86115105-86174116	KO	Rescue	OK	10.3566	13.819	0.416109	2.6561	5e-05	0.000584007	yes	2.6561
XLOC_009501	XLOC_009501	SNRPA1	chr15:101821714-101835460	KO	Rescue	OK	154.538	116.121	-0.412334	-2.65345	5e-05	0.000584007	yes	2.65345
XLOC_005769	XLOC_005769	GABARAPL1	chr12:10365121-10375732	KO	Rescue	OK	58.8927	44.2694	-0.411777	-2.65327	5e-05	0.000584007	yes	2.65327
XLOC_004242	XLOC_004242	PRDM11	chr11:45115563-45256675	KO	Rescue	OK	5.09482	7.30115	0.519093	2.65322	5e-05	0.000584007	yes	2.65322
XLOC_029468	XLOC_029468	AVPR2	chrX:153167167-153172620	KO	Rescue	OK	0.434735	0.141792	-1.61636	-2.65301	0.00015	0.00158822	yes	2.65301
XLOC_002137	XLOC_002137	RHOC	chr1:113243748-113250025	KO	Rescue	OK	91.5348	68.6655	-0.414735	-2.65209	5e-05	0.000584007	yes	2.65209
XLOC_010604	XLOC_010604	HSDL1	chr16:84155743-84178800	KO	Rescue	OK	5.68232	7.75158	0.448011	2.65074	5e-05	0.000584007	yes	2.65074
XLOC_013971	XLOC_013971	DNAJB1	chr19:14625581-14629201	KO	Rescue	OK	48.395	64.3875	0.411924	2.65041	5e-05	0.000584007	yes	2.65041
XLOC_019104	XLOC_019104	TMEM40	chr3:12775391-12800922	KO	Rescue	OK	0.471355	0.165127	-1.51324	-2.65008	5e-05	0.000584007	yes	2.65008
XLOC_025639	XLOC_025639	PSPH	chr7:56077520-56119268	KO	Rescue	OK	12.409	16.9419	0.4492	2.64966	5e-05	0.000584007	yes	2.64966
XLOC_019985	XLOC_019985	DCUN1D4	chr4:52709275-52783201	KO	Rescue	OK	9.82887	13.2054	0.426035	2.64801	5e-05	0.000584007	yes	2.64801
XLOC_003693	XLOC_003693	P4HA1	chr10:74766979-74856732	KO	Rescue	OK	14.3125	19.194	0.423376	2.64781	5e-05	0.000584007	yes	2.64781
XLOC_019207	XLOC_019207	FYCO1	chr3:45959390-46037317	KO	Rescue	OK	3.88693	2.83274	-0.456431	-2.64672	5e-05	0.000584007	yes	2.64672
XLOC_001964	XLOC_001964	JAK1	chr1:65210777-65432187	KO	Rescue	OK	128.541	94.9727	-0.43664	-2.6431	5e-05	0.000584007	yes	2.6431
XLOC_002815	XLOC_002815	ADSS	chr1:244570220-244615436	KO	Rescue	OK	21.4645	28.6597	0.417068	2.64057	5e-05	0.000584007	yes	2.64057
XLOC_022016	XLOC_022016	EBF1	chr5:158122922-158526788	KO	Rescue	OK	1.76492	1.21723	-0.536	-2.63733	5e-05	0.000584007	yes	2.63733
XLOC_028499	XLOC_028499	PHF16	chrX:46771735-46920641	KO	Rescue	OK	9.33104	12.4988	0.421678	2.63514	5e-05	0.000584007	yes	2.63514
XLOC_013478	XLOC_013478	ZNF480	chr19:52800306-52829181	KO	Rescue	OK	3.86419	5.28701	0.452286	2.6345	5e-05	0.000584007	yes	2.6345
XLOC_002635	XLOC_002635	CYB5R1	chr1:202931000-202936404	KO	Rescue	OK	22.8649	16.9172	-0.434645	-2.62914	5e-05	0.000584007	yes	2.62914
XLOC_026838	XLOC_026838	SBSPON	chr8:73973887-74005507	KO	Rescue	OK	0.950513	0.3812	-1.31816	-2.62685	5e-05	0.000584007	yes	2.62685
XLOC_021648	XLOC_021648	CCL28	chr5:43379043-43412502	KO	Rescue	OK	0.52423	0.112773	-2.21677	-2.62627	5e-05	0.000584007	yes	2.62627
XLOC_000965	XLOC_000965	ADAM15	chr1:155006281-155042029	KO	Rescue	OK	54.418	72.7211	0.41829	2.62393	5e-05	0.000584007	yes	2.62393
XLOC_013819	XLOC_013819	DENND1C	chr19:6464259-6481798	KO	Rescue	OK	0.124028	0.344101	1.47217	2.62087	0.0003	0.00290318	yes	2.62087
XLOC_022662	XLOC_022662	FAM229B	chr6:112391859-112423993	KO	Rescue	OK	1.39207	0.550447	-1.33855	-2.62047	0.00015	0.00158822	yes	2.62047
XLOC_028192	XLOC_028192	RPL12	chr9:130209952-130265780	KO	Rescue	OK	1705.45	1272.39	-0.422608	-2.62038	5e-05	0.000584007	yes	2.62038
XLOC_012918	XLOC_012918	QTRT1	chr19:10812072-10824043	KO	Rescue	OK	16.3834	22.3171	0.445911	2.61855	5e-05	0.000584007	yes	2.61855
XLOC_022344	XLOC_022344	PSORS1C1	chr6:31082405-31107869	KO	Rescue	OK	4.25058	2.0689	-1.0388	-2.6164	5e-05	0.000584007	yes	2.6164
XLOC_016033	XLOC_016033	POTEF	chr2:130830587-130886958	KO	Rescue	OK	0.247877	0.445953	0.847264	2.6148	5e-05	0.000584007	yes	2.6148
XLOC_005562	XLOC_005562	MPZL2	chr11:118124130-118135251	KO	Rescue	OK	3.57063	2.40528	-0.569974	-2.61415	5e-05	0.000584007	yes	2.61415
XLOC_003189	XLOC_003189	FAM25A	chr10:88780045-88784487	KO	Rescue	OK	2.44302	0.726475	-1.74968	-2.61405	0.00065	0.0056743	yes	2.61405
XLOC_014844	XLOC_014844	GKN1	chr2:69200987-69208112	KO	Rescue	OK	1.62776	0.746442	-1.12479	-2.61056	5e-05	0.000584007	yes	2.61056
XLOC_016146	XLOC_016146	GPR155	chr2:175295266-175351816	KO	Rescue	OK	0.880652	1.2707	0.528977	2.6099	5e-05	0.000584007	yes	2.6099
XLOC_004592	XLOC_004592	C11orf30	chr11:76138317-76264111	KO	Rescue	OK	4.57613	6.29235	0.45947	2.60969	5e-05	0.000584007	yes	2.60969
XLOC_008915	XLOC_008915	KIAA1024	chr15:79724857-79764642	KO	Rescue	OK	0.493166	0.265517	-0.893267	-2.60896	5e-05	0.000584007	yes	2.60896
XLOC_003678	XLOC_003678	LRRC20	chr10:72058728-72142455	KO	Rescue	OK	1.11218	0.684008	-0.701301	-2.60829	5e-05	0.000584007	yes	2.60829
XLOC_002053	XLOC_002053	TGFBR3	chr1:92145899-92371559	KO	Rescue	OK	25.6724	19.3943	-0.404587	-2.60701	5e-05	0.000584007	yes	2.60701
XLOC_007250	XLOC_007250	SLITRK5	chr13:88096241-88463503	KO	Rescue	OK	0.322334	0.631112	0.969341	2.60585	5e-05	0.000584007	yes	2.60585
XLOC_003495	XLOC_003495	PHYH	chr10:13319795-13342130	KO	Rescue	OK	9.39387	6.71892	-0.483491	-2.60408	5e-05	0.000584007	yes	2.60408
XLOC_016606	XLOC_016606	-	chr20:32723265-32724265	KO	Rescue	OK	0.477145	0.0954373	-2.3218	-2.60307	0.0014	0.0107001	yes	2.60307
XLOC_005881	XLOC_005881	ALG10B	chr12:38710556-38723528	KO	Rescue	OK	4.00675	5.39842	0.430105	2.6024	5e-05	0.000584007	yes	2.6024
XLOC_012760	XLOC_012760	WDR18	chr19:982931-994925	KO	Rescue	OK	30.5359	40.7529	0.416394	2.6	5e-05	0.000584007	yes	2.6
XLOC_004437	XLOC_004437	ARL2,ARL2-SNX15,SNX15	chr11:64781584-64808044	KO	Rescue	OK	50.6565	68.6142	0.437759	2.59995	5e-05	0.000584007	yes	2.59995
XLOC_000705	XLOC_000705	GNAT2	chr1:110145888-110160988	KO	Rescue	OK	0.44012	0.253456	-0.79616	-2.59876	5e-05	0.000584007	yes	2.59876
XLOC_021196	XLOC_021196	-	chr5:121390439-121398869	KO	Rescue	OK	0.236772	0.132102	-0.841844	-2.59747	5e-05	0.000584007	yes	2.59747
XLOC_004487	XLOC_004487	KLC2	chr11:66024640-66035332	KO	Rescue	OK	16.2444	21.7102	0.418432	2.5959	5e-05	0.000584007	yes	2.5959
XLOC_010431	XLOC_010431	-	chr16:53076584-53081166	KO	Rescue	OK	0.321402	0.0902549	-1.8323	-2.5953	0.0005	0.00451536	yes	2.5953
XLOC_003097	XLOC_003097	TET1	chr10:70320116-70454483	KO	Rescue	OK	1.78908	2.46911	0.464776	2.59273	5e-05	0.000584007	yes	2.59273
XLOC_010385	XLOC_010385	PRSS8	chr16:31142753-31147151	KO	Rescue	OK	4.87108	3.38219	-0.526282	-2.59193	5e-05	0.000584007	yes	2.59193
XLOC_008688	XLOC_008688	VPS18	chr15:41186627-41196173	KO	Rescue	OK	15.9111	11.9481	-0.413249	-2.59048	5e-05	0.000584007	yes	2.59048
XLOC_000006	XLOC_000006	LOC643837	chr1:762970-794880	KO	Rescue	OK	3.14887	2.18567	-0.52676	-2.58998	5e-05	0.000584007	yes	2.58998
XLOC_001200	XLOC_001200	CFH	chr1:196621007-196716634	KO	Rescue	OK	0.29886	0.0548672	-2.44546	-2.58988	0.0002	0.00205279	yes	2.58988
XLOC_021925	XLOC_021925	CD14	chr5:140011312-140013286	KO	Rescue	OK	0.5057	0.182064	-1.47384	-2.5896	5e-05	0.000584007	yes	2.5896
XLOC_012332	XLOC_012332	PTPRM	chr18:7567313-8406859	KO	Rescue	OK	2.0386	1.37797	-0.565035	-2.58944	5e-05	0.000584007	yes	2.58944
XLOC_016604	XLOC_016604	RALY	chr20:32581101-32672833	KO	Rescue	OK	20.2111	26.756	0.404714	2.58706	5e-05	0.000584007	yes	2.58706
XLOC_005437	XLOC_005437	CCDC90B	chr11:82971040-82997436	KO	Rescue	OK	7.32799	10.375	0.501625	2.58463	5e-05	0.000584007	yes	2.58463
XLOC_003342	XLOC_003342	DUSP5	chr10:112257624-112271302	KO	Rescue	OK	2.64315	1.78559	-0.565859	-2.58452	5e-05	0.000584007	yes	2.58452
XLOC_021320	XLOC_021320	SH3RF2	chr5:145316108-145459640	KO	Rescue	OK	2.16193	1.45504	-0.57126	-2.58447	5e-05	0.000584007	yes	2.58447
XLOC_019379	XLOC_019379	-	chr3:75766504-75768709	KO	Rescue	OK	0.0886586	0.270528	1.60944	2.58415	0.00025	0.00247504	yes	2.58415
XLOC_021316	XLOC_021316	ARHGAP26	chr5:142149767-142608572	KO	Rescue	OK	6.26945	4.45683	-0.492321	-2.58277	5e-05	0.000584007	yes	2.58277
XLOC_027425	XLOC_027425	TGFBR1	chr9:101866993-101916473	KO	Rescue	OK	61.7192	46.7568	-0.400543	-2.5779	5e-05	0.000584007	yes	2.5779
XLOC_001956	XLOC_001956	TM2D1	chr1:62145537-62191095	KO	Rescue	OK	33.7768	25.1986	-0.422693	-2.57689	5e-05	0.000584007	yes	2.57689
XLOC_006365	XLOC_006365	ZNF26	chr12:133562933-133602845	KO	Rescue	OK	1.59217	2.32551	0.546548	2.5765	5e-05	0.000584007	yes	2.5765
XLOC_021792	XLOC_021792	ELL2	chr5:95220801-95297775	KO	Rescue	OK	11.0956	14.6764	0.403508	2.57594	5e-05	0.000584007	yes	2.57594
XLOC_005067	XLOC_005067	CSTF3	chr11:33106129-33183058	KO	Rescue	OK	56.1108	35.7455	-0.650514	-2.57423	5e-05	0.000584007	yes	2.57423
XLOC_007865	XLOC_007865	PROX2	chr14:75319735-75330537	KO	Rescue	OK	0.547305	0.314781	-0.797997	-2.574	5e-05	0.000584007	yes	2.574
XLOC_007582	XLOC_007582	EFNB2	chr13:107142078-107187388	KO	Rescue	OK	0.259397	0.124132	-1.06328	-2.57278	0.0001	0.00109908	yes	2.57278
XLOC_025209	XLOC_025209	CAV2	chr7:116139368-116148598	KO	Rescue	OK	24.4601	18.4584	-0.406149	-2.57276	5e-05	0.000584007	yes	2.57276
XLOC_019804	XLOC_019804	FGFR3	chr4:1794985-1810600	KO	Rescue	OK	7.26925	5.38769	-0.432139	-2.57143	5e-05	0.000584007	yes	2.57143
XLOC_015165	XLOC_015165	FMNL2	chr2:153191627-153506480	KO	Rescue	OK	13.9364	10.4935	-0.409358	-2.57091	5e-05	0.000584007	yes	2.57091
XLOC_018488	XLOC_018488	-	chr3:46204900-46231878	KO	Rescue	OK	1.17483	0.593551	-0.985014	-2.57074	5e-05	0.000584007	yes	2.57074
XLOC_011552	XLOC_011552	LOC284023	chr17:7816637-7819621	KO	Rescue	OK	2.13916	3.12167	0.545274	2.56958	5e-05	0.000584007	yes	2.56958
XLOC_013006	XLOC_013006	KLF2	chr19:16435484-16438339	KO	Rescue	OK	1.13129	1.86394	0.720384	2.56948	5e-05	0.000584007	yes	2.56948
XLOC_017221	XLOC_017221	NCAM2	chr21:22370632-22912517	KO	Rescue	OK	0.650515	0.305432	-1.09073	-2.56705	5e-05	0.000584007	yes	2.56705
XLOC_024900	XLOC_024900	-	chr7:39618134-39621665	KO	Rescue	OK	0.323515	0.154909	-1.06241	-2.56657	0.00015	0.00158822	yes	2.56657
XLOC_008107	XLOC_008107	CRIP1	chr14:105948878-105955127	KO	Rescue	OK	325.068	246.079	-0.40162	-2.56645	5e-05	0.000584007	yes	2.56645
XLOC_028131	XLOC_028131	ALAD	chr9:116148591-116163620	KO	Rescue	OK	6.08236	4.43615	-0.455324	-2.56644	5e-05	0.000584007	yes	2.56644
XLOC_012339	XLOC_012339	RAB31	chr18:9708227-9862553	KO	Rescue	OK	42.8453	32.5365	-0.397076	-2.56244	5e-05	0.000584007	yes	2.56244
XLOC_021010	XLOC_021010	HSPB3	chr5:53751430-53752214	KO	Rescue	OK	1.66822	0.782493	-1.09216	-2.56089	0.0001	0.00109908	yes	2.56089
XLOC_023164	XLOC_023164	SAYSD1	chr6:39071763-39082949	KO	Rescue	OK	1.77342	1.06256	-0.738993	-2.56031	5e-05	0.000584007	yes	2.56031
XLOC_005214	XLOC_005214	GANAB	chr11:62392297-62414104	KO	Rescue	OK	155.708	206.102	0.404519	2.55959	5e-05	0.000584007	yes	2.55959
XLOC_017092	XLOC_017092	PREX1	chr20:47240792-47444854	KO	Rescue	OK	3.38383	4.55171	0.427754	2.55788	5e-05	0.000584007	yes	2.55788
XLOC_026770	XLOC_026770	CEBPD	chr8:48173356-48651602	KO	Rescue	OK	24.49	39.1459	0.676666	2.55741	5e-05	0.000584007	yes	2.55741
XLOC_016439	XLOC_016439	TRIB3	chr20:361307-378203	KO	Rescue	OK	29.2059	38.5741	0.401373	2.55636	5e-05	0.000584007	yes	2.55636
XLOC_019567	XLOC_019567	RBP2	chr3:139171725-139199708	KO	Rescue	OK	0.782365	0.132154	-2.56562	-2.55454	0.0003	0.00290318	yes	2.55454
XLOC_012923	XLOC_012923	CARM1	chr19:10981908-11040916	KO	Rescue	OK	35.5607	48.8166	0.457089	2.55046	5e-05	0.000584007	yes	2.55046
XLOC_001849	XLOC_001849	LEPRE1	chr1:43212005-43232755	KO	Rescue	OK	18.885	14.1697	-0.414425	-2.54895	5e-05	0.000584007	yes	2.54895
XLOC_005287	XLOC_005287	-	chr11:65759157-65760840	KO	Rescue	OK	0.247497	0.568329	1.19931	2.54895	0.0001	0.00109908	yes	2.54895
XLOC_022697	XLOC_022697	HINT3	chr6:126277860-126301389	KO	Rescue	OK	10.9514	8.18793	-0.419541	-2.54829	5e-05	0.000584007	yes	2.54829
XLOC_014841	XLOC_014841	APLF	chr2:68694690-68807294	KO	Rescue	OK	0.672758	0.230416	-1.54585	-2.54771	0.00015	0.00158822	yes	2.54771
XLOC_004121	XLOC_004121	CTR9	chr11:10772810-10801290	KO	Rescue	OK	24.7468	32.5509	0.395456	2.54638	5e-05	0.000584007	yes	2.54638
XLOC_003571	XLOC_003571	NRP1	chr10:33466368-33625176	KO	Rescue	OK	4.46672	6.23777	0.481817	2.54593	5e-05	0.000584007	yes	2.54593
XLOC_021052	XLOC_021052	CENPH	chr5:68485368-68506184	KO	Rescue	OK	25.6713	34.1466	0.411586	2.54574	5e-05	0.000584007	yes	2.54574
XLOC_005565	XLOC_005565	IFT46	chr11:118401802-118436791	KO	Rescue	OK	4.96647	3.43609	-0.531452	-2.54358	5e-05	0.000584007	yes	2.54358
XLOC_007615	XLOC_007615	GAS6	chr13:114518582-114567046	KO	Rescue	OK	0.366648	0.14328	-1.35555	-2.54321	5e-05	0.000584007	yes	2.54321
XLOC_022390	XLOC_022390	LOC100294145	chr6:32861952-32871535	KO	Rescue	OK	5.97397	4.38342	-0.446632	-2.54208	5e-05	0.000584007	yes	2.54208
XLOC_010351	XLOC_010351	YPEL3	chr16:30103634-30107575	KO	Rescue	OK	1.83186	0.834363	-1.13456	-2.54153	5e-05	0.000584007	yes	2.54153
XLOC_011583	XLOC_011583	GAS7	chr17:9813925-10101868	KO	Rescue	OK	0.331799	0.519728	0.647447	2.54043	5e-05	0.000584007	yes	2.54043
XLOC_017045	XLOC_017045	JPH2	chr20:42737378-42816578	KO	Rescue	OK	2.12848	3.02719	0.508156	2.53872	5e-05	0.000584007	yes	2.53872
XLOC_005212	XLOC_005212	EML3,MTA2	chr11:62360668-62382592	KO	Rescue	OK	70.9468	94.2194	0.409286	2.53745	5e-05	0.000584007	yes	2.53745
XLOC_006324	XLOC_006324	DDX55	chr12:124086671-124105482	KO	Rescue	OK	34.1865	25.9189	-0.399422	-2.53548	5e-05	0.000584007	yes	2.53548
XLOC_004772	XLOC_004772	SC5DL	chr11:121163387-121184119	KO	Rescue	OK	4.12942	3.07265	-0.426455	-2.53457	5e-05	0.000584007	yes	2.53457
XLOC_013938	XLOC_013938	-	chr19:12793486-12794383	KO	Rescue	OK	0.103994	0.472417	2.18355	2.53455	0.0019	0.0137801	yes	2.53455
XLOC_001075	XLOC_001075	PBX1	chr1:164528151-164821060	KO	Rescue	OK	13.6241	17.9292	0.396156	2.53262	5e-05	0.000584007	yes	2.53262
XLOC_028419	XLOC_028419	CDKL5	chrX:18443662-18690223	KO	Rescue	OK	1.50259	2.09182	0.477309	2.53256	5e-05	0.000584007	yes	2.53256
XLOC_014399	XLOC_014399	RRAS	chr19:50138551-50143400	KO	Rescue	OK	17.4078	12.592	-0.467228	-2.53104	5e-05	0.000584007	yes	2.53104
XLOC_003100	XLOC_003100	STOX1	chr10:70587293-70655209	KO	Rescue	OK	0.696399	0.357374	-0.962478	-2.52998	5e-05	0.000584007	yes	2.52998
XLOC_021919	XLOC_021919	-	chr5:139482678-139485345	KO	Rescue	OK	1.37025	0.732811	-0.902921	-2.52839	0.0001	0.00109908	yes	2.52839
XLOC_017776	XLOC_017776	SMTN	chr22:31477281-31500612	KO	Rescue	OK	10.5323	7.86987	-0.420412	-2.52808	5e-05	0.000584007	yes	2.52808
XLOC_006767	XLOC_006767	LRIG3	chr12:59265936-59314319	KO	Rescue	OK	3.04624	4.19428	0.46139	2.52808	5e-05	0.000584007	yes	2.52808
XLOC_004710	XLOC_004710	PTS	chr11:112096774-112105355	KO	Rescue	OK	61.9852	46.703	-0.408408	-2.527	5e-05	0.000584007	yes	2.527
XLOC_023060	XLOC_023060	HLA-B,HLA-C	chr6:31236525-31324995	KO	Rescue	OK	79.381	104.126	0.39146	2.52494	5e-05	0.000584007	yes	2.52494
XLOC_018224	XLOC_018224	RRP7A	chr22:42896584-42915829	KO	Rescue	OK	13.7686	18.1156	0.39585	2.52099	5e-05	0.000584007	yes	2.52099
XLOC_028820	XLOC_028820	-	chrX:133658050-133659934	KO	Rescue	OK	0.319653	0.6515	1.02726	2.52077	5e-05	0.000584007	yes	2.52077
XLOC_006189	XLOC_006189	-	chr12:102599761-102604850	KO	Rescue	OK	0.127369	0.252428	0.986864	2.51661	5e-05	0.000584007	yes	2.51661
XLOC_017958	XLOC_017958	-	chr22:51066705-51075214	KO	Rescue	OK	0.375444	0.0311369	-3.5919	-2.5128	0.00045	0.00411481	yes	2.5128
XLOC_014334	XLOC_014334	SLC1A5	chr19:47278139-47291842	KO	Rescue	OK	69.305	91.2169	0.396341	2.51267	5e-05	0.000584007	yes	2.51267
XLOC_026850	XLOC_026850	HEY1	chr8:80676244-80680098	KO	Rescue	OK	5.67294	7.76761	0.453375	2.51195	5e-05	0.000584007	yes	2.51195
XLOC_009295	XLOC_009295	PDCD7	chr15:65409716-65426174	KO	Rescue	OK	9.75926	13.0025	0.413947	2.51177	5e-05	0.000584007	yes	2.51177
XLOC_002580	XLOC_002580	FAM129A	chr1:184760165-184943682	KO	Rescue	OK	13.4615	10.249	-0.393359	-2.50987	5e-05	0.000584007	yes	2.50987
XLOC_013048	XLOC_013048	TMEM59L	chr19:18718077-18731849	KO	Rescue	OK	1.12954	0.604482	-0.90197	-2.50946	5e-05	0.000584007	yes	2.50946
XLOC_011532	XLOC_011532	ASGR1	chr17:7076750-7082883	KO	Rescue	OK	0.388563	0.0821031	-2.24264	-2.50844	0.00025	0.00247504	yes	2.50844
XLOC_028383	XLOC_028383	MIR4767,STS	chrX:6966960-7272682	KO	Rescue	OK	6.51213	4.26063	-0.612063	-2.50815	5e-05	0.000584007	yes	2.50815
XLOC_010876	XLOC_010876	CCDC144C	chr17:20224486-20305504	KO	Rescue	OK	0.24367	0.109388	-1.15547	-2.50592	0.00015	0.00158822	yes	2.50592
XLOC_004897	XLOC_004897	RHOG	chr11:3848207-3862213	KO	Rescue	OK	31.2982	41.4255	0.404436	2.50591	5e-05	0.000584007	yes	2.50591
XLOC_010718	XLOC_010718	KIF1C	chr17:4900936-4931694	KO	Rescue	OK	30.3501	39.7204	0.388181	2.50458	5e-05	0.000584007	yes	2.50458
XLOC_008824	XLOC_008824	-	chr15:67149707-67151106	KO	Rescue	OK	0.293506	0.0623208	-2.2356	-2.50443	0.0048	0.0290443	yes	2.50443
XLOC_020363	XLOC_020363	LOC100130872,SPON2	chr4:1160720-1202750	KO	Rescue	OK	1.00864	0.531794	-0.92347	-2.50289	5e-05	0.000584007	yes	2.50289
XLOC_020469	XLOC_020469	APBB2	chr4:40812043-41216673	KO	Rescue	OK	7.87475	5.98517	-0.395843	-2.50258	5e-05	0.000584007	yes	2.50258
XLOC_001761	XLOC_001761	MARCKSL1	chr1:32799429-32801840	KO	Rescue	OK	92.5239	121.058	0.387795	2.50214	5e-05	0.000584007	yes	2.50214
XLOC_000135	XLOC_000135	TNFRSF8	chr1:12123433-12204264	KO	Rescue	OK	0.222202	0.0772389	-1.52448	-2.50106	0.0002	0.00205279	yes	2.50106
XLOC_009949	XLOC_009949	TANGO6	chr16:68877438-69121509	KO	Rescue	OK	5.8474	7.80082	0.415832	2.50094	5e-05	0.000584007	yes	2.50094
XLOC_020403	XLOC_020403	ACOX3	chr4:8367841-8442468	KO	Rescue	OK	2.86128	1.99565	-0.519801	-2.49993	5e-05	0.000584007	yes	2.49993
XLOC_004607	XLOC_004607	-	chr11:81350249-81350566	KO	Rescue	OK	3.68155	7.45024	1.01697	2.49888	0.0001	0.00109908	yes	2.49888
XLOC_014258	XLOC_014258	PSG5	chr19:43671894-43690688	KO	Rescue	OK	0.414448	0.0657034	-2.65715	-2.49551	0.00015	0.00158822	yes	2.49551
XLOC_011759	XLOC_011759	SRCIN1	chr17:36686258-36762183	KO	Rescue	OK	0.943376	0.593726	-0.668035	-2.49544	5e-05	0.000584007	yes	2.49544
XLOC_012250	XLOC_012250	FAM195B	chr17:79780292-79791167	KO	Rescue	OK	6.6669	4.57975	-0.541747	-2.49286	5e-05	0.000584007	yes	2.49286
XLOC_014759	XLOC_014759	PKDCC	chr2:42275145-42286547	KO	Rescue	OK	52.6575	40.1064	-0.392808	-2.49202	5e-05	0.000584007	yes	2.49202
XLOC_022653	XLOC_022653	-	chr6:111350995-111354530	KO	Rescue	OK	0.270647	0.124343	-1.12209	-2.49149	0.0002	0.00205279	yes	2.49149
XLOC_002360	XLOC_002360	PBXIP1	chr1:154916555-154928615	KO	Rescue	OK	4.52513	3.2843	-0.462371	-2.48988	5e-05	0.000584007	yes	2.48988
XLOC_013967	XLOC_013967	LPHN1	chr19:14247963-14318135	KO	Rescue	OK	12.7056	9.68519	-0.391613	-2.48875	5e-05	0.000584007	yes	2.48875
XLOC_020587	XLOC_020587	PLAC8	chr4:84007120-84036016	KO	Rescue	OK	59.9366	42.6936	-0.489416	-2.48795	0.0001	0.00109908	yes	2.48795
XLOC_001179	XLOC_001179	PRG4	chr1:185703682-186446655	KO	Rescue	OK	7.1577	0.97057	-2.88259	-2.48554	0.00175	0.0128592	yes	2.48554
XLOC_008253	XLOC_008253	MDGA2	chr14:47308827-48144157	KO	Rescue	OK	0.200007	0.365596	0.870198	2.48484	5e-05	0.000584007	yes	2.48484
XLOC_001332	XLOC_001332	SPATA17	chr1:217804688-218040727	KO	Rescue	OK	1.76976	0.942594	-0.908848	-2.48348	5e-05	0.000584007	yes	2.48348
XLOC_012141	XLOC_012141	CDC42EP4	chr17:71279762-71308143	KO	Rescue	OK	72.5268	55.5522	-0.38467	-2.48299	5e-05	0.000584007	yes	2.48299
XLOC_001159	XLOC_001159	IER5	chr1:181057637-181061912	KO	Rescue	OK	19.7146	14.9034	-0.403625	-2.48252	5e-05	0.000584007	yes	2.48252
XLOC_022288	XLOC_022288	ZSCAN16	chr6:28089615-28105158	KO	Rescue	OK	2.93471	4.7823	0.704484	2.48223	0.0001	0.00109908	yes	2.48223
XLOC_022051	XLOC_022051	BOD1	chr5:173030723-173043697	KO	Rescue	OK	19.8171	26.3379	0.410392	2.48167	5e-05	0.000584007	yes	2.48167
XLOC_026436	XLOC_026436	-	chr8:103819277-103824163	KO	Rescue	OK	1.12529	0.720078	-0.644076	-2.47689	5e-05	0.000584007	yes	2.47689
XLOC_020492	XLOC_020492	USP46	chr4:53457126-53525502	KO	Rescue	OK	3.07314	4.08568	0.410861	2.47648	5e-05	0.000584007	yes	2.47648
XLOC_021573	XLOC_021573	-	chr5:24253242-24272124	KO	Rescue	OK	4.67445	3.56285	-0.391767	-2.47533	5e-05	0.000584007	yes	2.47533
XLOC_001634	XLOC_001634	-	chr1:17215030-17216172	KO	Rescue	OK	3.36724	1.38621	-1.28042	-2.47506	0.00015	0.00158822	yes	2.47506
XLOC_013112	XLOC_013112	NUDT19	chr19:33182866-33204702	KO	Rescue	OK	20.0207	26.2518	0.390922	2.47465	5e-05	0.000584007	yes	2.47465
XLOC_004595	XLOC_004595	-	chr11:76511303-76515556	KO	Rescue	OK	0.209546	0.382015	0.86636	2.47439	5e-05	0.000584007	yes	2.47439
XLOC_000118	XLOC_000118	MASP2	chr1:11086579-11107296	KO	Rescue	OK	0.0614077	0.564777	3.20119	2.47321	0.0058	0.0337197	yes	2.47321
XLOC_009106	XLOC_009106	GOLGA8A	chr15:34671269-34729667	KO	Rescue	OK	3.63808	4.91926	0.435262	2.47293	5e-05	0.000584007	yes	2.47293
XLOC_009351	XLOC_009351	LOXL1-AS1	chr15:74209808-74244478	KO	Rescue	OK	0.846327	0.271873	-1.63828	-2.46957	0.0001	0.00109908	yes	2.46957
XLOC_013628	XLOC_013628	ZNF460	chr19:57791250-57819925	KO	Rescue	OK	4.49477	5.92566	0.398729	2.46936	5e-05	0.000584007	yes	2.46936
XLOC_018294	XLOC_018294	BHLHE40	chr3:5020189-5026865	KO	Rescue	OK	15.0961	11.446	-0.399331	-2.46927	5e-05	0.000584007	yes	2.46927
XLOC_015605	XLOC_015605	DNMT3A	chr2:25451128-25565459	KO	Rescue	OK	0.571846	0.930898	0.702997	2.4686	5e-05	0.000584007	yes	2.4686
XLOC_010795	XLOC_010795	USP43	chr17:9548031-9633005	KO	Rescue	OK	7.48196	5.61615	-0.413835	-2.46762	5e-05	0.000584007	yes	2.46762
XLOC_025269	XLOC_025269	CPA4	chr7:129932973-129964020	KO	Rescue	OK	46.426	35.5667	-0.384405	-2.46732	5e-05	0.000584007	yes	2.46732
XLOC_003860	XLOC_003860	FGF8,NPM3	chr10:103529886-103543173	KO	Rescue	OK	60.07	78.9893	0.395014	2.46726	5e-05	0.000584007	yes	2.46726
XLOC_027424	XLOC_027424	COL15A1	chr9:101706137-101833076	KO	Rescue	OK	2.4879	1.70287	-0.546966	-2.46714	0.0001	0.00109908	yes	2.46714
XLOC_013615	XLOC_013615	ZNF583	chr19:56915382-56936405	KO	Rescue	OK	0.60753	0.999706	0.718549	2.4671	5e-05	0.000584007	yes	2.4671
XLOC_006237	XLOC_006237	MVK	chr12:110011499-110035071	KO	Rescue	OK	10.6935	7.91176	-0.434666	-2.46709	5e-05	0.000584007	yes	2.46709
XLOC_012350	XLOC_012350	TUBB6	chr18:12307630-12326717	KO	Rescue	OK	143.471	110.079	-0.382222	-2.4663	5e-05	0.000584007	yes	2.4663
XLOC_012270	XLOC_012270	SECTM1	chr17:80278899-80291921	KO	Rescue	OK	7.04514	5.1487	-0.452422	-2.46605	5e-05	0.000584007	yes	2.46605
XLOC_004325	XLOC_004325	-	chr11:57600261-57601999	KO	Rescue	OK	0.250282	0.0453942	-2.46297	-2.46551	0.00385	0.0241504	yes	2.46551
XLOC_009039	XLOC_009039	LRRK1	chr15:101457131-101615294	KO	Rescue	OK	4.48165	5.97128	0.414011	2.46424	5e-05	0.000584007	yes	2.46424
XLOC_017326	XLOC_017326	-	chr21:44748050-44778185	KO	Rescue	OK	0.832073	0.488711	-0.767727	-2.4642	5e-05	0.000584007	yes	2.4642
XLOC_018617	XLOC_018617	-	chr3:69065491-69067934	KO	Rescue	OK	0.219883	0.0733149	-1.58456	-2.46354	0.00065	0.0056743	yes	2.46354
XLOC_016526	XLOC_016526	DTD1	chr20:18568555-18744560	KO	Rescue	OK	23.3626	30.9123	0.403978	2.46328	5e-05	0.000584007	yes	2.46328
XLOC_020791	XLOC_020791	DDX60L	chr4:169277884-169401894	KO	Rescue	OK	3.1091	2.22613	-0.481958	-2.46306	5e-05	0.000584007	yes	2.46306
XLOC_004721	XLOC_004721	NNMT	chr11:114165700-114184345	KO	Rescue	OK	43.8434	33.2759	-0.397881	-2.46275	5e-05	0.000584007	yes	2.46275
XLOC_013137	XLOC_013137	FXYD1	chr19:35629731-35633954	KO	Rescue	OK	1.91478	0.755874	-1.34096	-2.46272	0.00025	0.00247504	yes	2.46272
XLOC_005156	XLOC_005156	SSRP1	chr11:57093458-57103351	KO	Rescue	OK	205.69	269.058	0.387446	2.46248	5e-05	0.000584007	yes	2.46248
XLOC_012672	XLOC_012672	MYO5B	chr18:47349155-47721596	KO	Rescue	OK	4.1225	5.42606	0.396384	2.46201	5e-05	0.000584007	yes	2.46201
XLOC_018130	XLOC_018130	-	chr22:35937351-35983768	KO	Rescue	OK	0.0937266	0.502546	2.42272	2.46194	0.00165	0.0122424	yes	2.46194
XLOC_022479	XLOC_022479	SRF	chr6:43138919-43149244	KO	Rescue	OK	21.0524	16.1036	-0.386603	-2.45788	5e-05	0.000584007	yes	2.45788
XLOC_013858	XLOC_013858	ZNF558	chr19:8919114-8943167	KO	Rescue	OK	3.17518	4.39532	0.469128	2.45698	5e-05	0.000584007	yes	2.45698
XLOC_012387	XLOC_012387	-	chr18:22335020-22524804	KO	Rescue	OK	1.1348	0.34107	-1.73429	-2.45685	5e-05	0.000584007	yes	2.45685
XLOC_008398	XLOC_008398	TGFB3	chr14:76424441-76448549	KO	Rescue	OK	1.11855	1.65977	0.569349	2.45613	5e-05	0.000584007	yes	2.45613
XLOC_028845	XLOC_028845	-	chrX:136000368-136003609	KO	Rescue	OK	0.132992	0.287899	1.11422	2.45573	0.0001	0.00109908	yes	2.45573
XLOC_003465	XLOC_003465	-	chr10:3597708-3668391	KO	Rescue	OK	1.33762	0.767272	-0.801861	-2.45549	5e-05	0.000584007	yes	2.45549
XLOC_015671	XLOC_015671	-	chr2:38347519-38349757	KO	Rescue	OK	0.31844	0.125776	-1.34017	-2.45365	5e-05	0.000584007	yes	2.45365
XLOC_007337	XLOC_007337	PSPC1	chr13:20248891-20357159	KO	Rescue	OK	43.5423	33.1938	-0.391505	-2.45351	5e-05	0.000584007	yes	2.45351
XLOC_018720	XLOC_018720	ARHGAP31	chr3:119013219-119138662	KO	Rescue	OK	0.602409	0.394965	-0.609018	-2.45317	5e-05	0.000584007	yes	2.45317
XLOC_003757	XLOC_003757	MMRN2	chr10:88695297-88723017	KO	Rescue	OK	5.05556	2.51084	-1.0097	-2.45154	0.0001	0.00109908	yes	2.45154
XLOC_021687	XLOC_021687	-	chr5:60545425-60548716	KO	Rescue	OK	0.427162	0.150203	-1.50787	-2.45115	0.00035	0.00330127	yes	2.45115
XLOC_002401	XLOC_002401	BCAN	chr1:156607625-156629324	KO	Rescue	OK	3.7981	5.19805	0.452692	2.44948	5e-05	0.000584007	yes	2.44948
XLOC_001770	XLOC_001770	TMEM54	chr1:33352097-33366953	KO	Rescue	OK	2.62034	1.56093	-0.747351	-2.44462	5e-05	0.000584007	yes	2.44462
XLOC_016147	XLOC_016147	WIPF1	chr2:175424201-175547627	KO	Rescue	OK	19.0833	24.8799	0.382672	2.4442	5e-05	0.000584007	yes	2.4442
XLOC_016006	XLOC_016006	-	chr2:120992870-121003669	KO	Rescue	OK	0.134521	0.311324	1.21059	2.44413	0.00025	0.00247504	yes	2.44413
XLOC_002644	XLOC_002644	ETNK2	chr1:204100187-204121307	KO	Rescue	OK	2.42896	3.42508	0.495799	2.44371	5e-05	0.000584007	yes	2.44371
XLOC_027252	XLOC_027252	TMEM8B	chr9:35829221-35855335	KO	Rescue	OK	2.84406	1.97166	-0.528547	-2.44233	5e-05	0.000584007	yes	2.44233
XLOC_023081	XLOC_023081	HSPA1L	chr6:31777395-31782835	KO	Rescue	OK	0.81056	1.28111	0.660401	2.4419	5e-05	0.000584007	yes	2.4419
XLOC_022601	XLOC_022601	PM20D2	chr6:89855768-89875289	KO	Rescue	OK	13.1974	17.2605	0.387219	2.4416	5e-05	0.000584007	yes	2.4416
XLOC_027728	XLOC_027728	-	chr9:2764361-2776887	KO	Rescue	OK	0.343456	0.49945	0.540216	2.44054	5e-05	0.000584007	yes	2.44054
XLOC_014058	XLOC_014058	ZNF100	chr19:21906537-21950430	KO	Rescue	OK	1.10107	1.58403	0.52469	2.44022	5e-05	0.000584007	yes	2.44022
XLOC_006396	XLOC_006396	-	chr12:5668190-5669230	KO	Rescue	OK	0.475123	0.130931	-1.85949	-2.43816	0.0008	0.00674826	yes	2.43816
XLOC_011761	XLOC_011761	-	chr17:36837675-36838378	KO	Rescue	OK	1.11387	0.428469	-1.37832	-2.43742	0.00045	0.00411481	yes	2.43742
XLOC_002951	XLOC_002951	KIAA1217	chr10:23983674-24836772	KO	Rescue	OK	2.49057	1.8405	-0.436377	-2.43567	5e-05	0.000584007	yes	2.43567
XLOC_027124	XLOC_027124	ZNF251	chr8:145946293-145981360	KO	Rescue	OK	7.3542	5.45492	-0.431011	-2.43511	5e-05	0.000584007	yes	2.43511
XLOC_013554	XLOC_013554	CACNG6	chr19:54495541-54515920	KO	Rescue	OK	0.473613	0.138806	-1.77064	-2.43423	5e-05	0.000584007	yes	2.43423
XLOC_018229	XLOC_018229	A4GALT	chr22:43088124-43116905	KO	Rescue	OK	4.58222	3.25254	-0.494481	-2.43366	5e-05	0.000584007	yes	2.43366
XLOC_017016	XLOC_017016	SAMHD1	chr20:35504569-35580331	KO	Rescue	OK	5.8883	4.32577	-0.444893	-2.43366	5e-05	0.000584007	yes	2.43366
XLOC_019814	XLOC_019814	SH3BP2	chr4:2794749-2842825	KO	Rescue	OK	3.13182	2.35363	-0.412116	-2.43344	5e-05	0.000584007	yes	2.43344
XLOC_004195	XLOC_004195	LINC00294	chr11:33097695-33101000	KO	Rescue	OK	6.92753	5.17264	-0.421441	-2.43317	5e-05	0.000584007	yes	2.43317
XLOC_023460	XLOC_023460	SGK1	chr6:134490383-134639297	KO	Rescue	OK	160.906	209.199	0.378659	2.43288	5e-05	0.000584007	yes	2.43288
XLOC_013789	XLOC_013789	PLIN3	chr19:4838345-4867780	KO	Rescue	OK	49.3398	37.9233	-0.379668	-2.43277	5e-05	0.000584007	yes	2.43277
XLOC_002895	XLOC_002895	LINC00707	chr10:6821559-6884868	KO	Rescue	OK	0.962994	1.4601	0.60047	2.43204	5e-05	0.000584007	yes	2.43204
XLOC_005894	XLOC_005894	-	chr12:46775447-47046341	KO	Rescue	OK	3.82093	1.74902	-1.12737	-2.42987	5e-05	0.000584007	yes	2.42987
XLOC_022267	XLOC_022267	-	chr6:26673615-26688037	KO	Rescue	OK	0.360976	0.630552	0.804711	2.42804	0.0001	0.00109908	yes	2.42804
XLOC_021418	XLOC_021418	CREBRF	chr5:172483354-172566291	KO	Rescue	OK	0.850444	0.511984	-0.732118	-2.42631	0.0001	0.00109908	yes	2.42631
XLOC_007396	XLOC_007396	CCDC169,CCDC169-SOHLH2,SOHLH2	chr13:36742344-36871992	KO	Rescue	OK	28.2121	36.8657	0.385965	2.4262	5e-05	0.000584007	yes	2.4262
XLOC_026815	XLOC_026815	MYBL1	chr8:67474409-67526787	KO	Rescue	OK	7.95092	6.02192	-0.400898	-2.42605	5e-05	0.000584007	yes	2.42605
XLOC_013695	XLOC_013695	PPAP2C	chr19:281043-291435	KO	Rescue	OK	53.1013	69.2077	0.382186	2.42582	5e-05	0.000584007	yes	2.42582
XLOC_021692	XLOC_021692	ADAMTS6	chr5:64444562-64777759	KO	Rescue	OK	1.46282	2.06002	0.493903	2.42468	5e-05	0.000584007	yes	2.42468
XLOC_021043	XLOC_021043	NLN	chr5:65018011-65125206	KO	Rescue	OK	14.6761	19.0449	0.375937	2.42381	5e-05	0.000584007	yes	2.42381
XLOC_016312	XLOC_016312	-	chr2:220232721-220234774	KO	Rescue	OK	0.804901	0.445203	-0.854347	-2.42331	5e-05	0.000584007	yes	2.42331
XLOC_020793	XLOC_020793	-	chr4:169967188-169995459	KO	Rescue	OK	1.06283	2.01129	0.920205	2.42224	5e-05	0.000584007	yes	2.42224
XLOC_013631	XLOC_013631	-	chr19:57849954-57852465	KO	Rescue	OK	0.294029	0.123019	-1.25707	-2.42197	0.00055	0.00490871	yes	2.42197
XLOC_021892	XLOC_021892	KLHL3	chr5:136953188-137071779	KO	Rescue	OK	0.200816	0.106579	-0.913953	-2.42032	0.0001	0.00109908	yes	2.42032
XLOC_021807	XLOC_021807	FBXL17	chr5:107194733-107717799	KO	Rescue	OK	3.52877	2.61738	-0.431041	-2.4199	5e-05	0.000584007	yes	2.4199
XLOC_027646	XLOC_027646	COL5A1	chr9:137533651-137736688	KO	Rescue	OK	49.3729	38.0587	-0.375492	-2.41839	5e-05	0.000584007	yes	2.41839
XLOC_005573	XLOC_005573	SLC37A4	chr11:118895060-118901632	KO	Rescue	OK	14.3854	18.9317	0.396199	2.41766	5e-05	0.000584007	yes	2.41766
XLOC_027140	XLOC_027140	DOCK8	chr9:213107-465259	KO	Rescue	OK	0.345103	0.181338	-0.928348	-2.41602	5e-05	0.000584007	yes	2.41602
XLOC_029440	XLOC_029440	GABRE	chrX:151121594-151143189	KO	Rescue	OK	10.5236	13.8243	0.39357	2.41549	5e-05	0.000584007	yes	2.41549
XLOC_028990	XLOC_028990	FIGF,PIR,PIR-FIGF	chrX:15363712-15511711	KO	Rescue	OK	29.1745	38.23	0.389995	2.41475	5e-05	0.000584007	yes	2.41475
XLOC_001585	XLOC_001585	CASZ1	chr1:10696665-10856733	KO	Rescue	OK	1.47608	1.00975	-0.54778	-2.41065	5e-05	0.000584007	yes	2.41065
XLOC_012623	XLOC_012623	INO80C	chr18:33048290-33077955	KO	Rescue	OK	16.323	11.9563	-0.449138	-2.41051	5e-05	0.000584007	yes	2.41051
XLOC_009356	XLOC_009356	CYP11A1	chr15:74630085-74660081	KO	Rescue	OK	2.72983	1.82912	-0.577662	-2.41026	5e-05	0.000584007	yes	2.41026
XLOC_011638	XLOC_011638	FOXO3B,ZNF286B	chr17:18561741-18585572	KO	Rescue	OK	0.867984	1.24079	0.515514	2.40896	5e-05	0.000584007	yes	2.40896
XLOC_020989	XLOC_020989	NNT	chr5:43571797-43707426	KO	Rescue	OK	5.87106	4.3568	-0.430354	-2.4088	5e-05	0.000584007	yes	2.4088
XLOC_025774	XLOC_025774	PDK4	chr7:95212808-95225925	KO	Rescue	OK	3.58025	2.61539	-0.453034	-2.40866	5e-05	0.000584007	yes	2.40866
XLOC_029216	XLOC_029216	HMGN5	chrX:80369199-80554046	KO	Rescue	OK	6.55687	8.90633	0.441823	2.40813	5e-05	0.000584007	yes	2.40813
XLOC_023496	XLOC_023496	HYMAI,PLAGL1	chr6:144261434-144385735	KO	Rescue	OK	16.8951	12.9006	-0.389169	-2.40788	5e-05	0.000584007	yes	2.40788
XLOC_021163	XLOC_021163	WDR36	chr5:110427869-110466200	KO	Rescue	OK	14.6666	19.0139	0.374519	2.40736	5e-05	0.000584007	yes	2.40736
XLOC_028074	XLOC_028074	TBC1D2	chr9:100961279-101018152	KO	Rescue	OK	1.68952	1.1543	-0.54959	-2.40635	0.00015	0.00158822	yes	2.40635
XLOC_009298	XLOC_009298	PARP16	chr15:65550434-65579275	KO	Rescue	OK	4.4482	6.0467	0.442925	2.40635	5e-05	0.000584007	yes	2.40635
XLOC_000890	XLOC_000890	PRUNE	chr1:150980894-151008189	KO	Rescue	OK	9.51463	12.531	0.397279	2.40621	5e-05	0.000584007	yes	2.40621
XLOC_008351	XLOC_008351	ZFP36L1	chr14:69254371-69262960	KO	Rescue	OK	25.9914	19.9244	-0.383496	-2.40616	5e-05	0.000584007	yes	2.40616
XLOC_005298	XLOC_005298	MRPL11	chr11:66202549-66206310	KO	Rescue	OK	38.8428	50.5403	0.379785	2.40325	5e-05	0.000584007	yes	2.40325
XLOC_017186	XLOC_017186	MIR3648,MIR3687	chr21:9825435-9827839	KO	Rescue	OK	450.705	596.66	0.404726	2.40257	5e-05	0.000584007	yes	2.40257
XLOC_029472	XLOC_029472	HCFC1	chrX:153212839-153248646	KO	Rescue	OK	42.3118	54.9872	0.378035	2.40228	5e-05	0.000584007	yes	2.40228
XLOC_022414	XLOC_022414	DEF6	chr6:35265594-35289549	KO	Rescue	OK	2.50044	1.56836	-0.672923	-2.40216	5e-05	0.000584007	yes	2.40216
XLOC_018791	XLOC_018791	COPG1	chr3:128968452-128996616	KO	Rescue	OK	93.7056	72.4386	-0.371376	-2.40214	0.0001	0.00109908	yes	2.40214
XLOC_023181	XLOC_023181	TFEB	chr6:41651713-41703997	KO	Rescue	OK	2.55827	1.74035	-0.555792	-2.3967	5e-05	0.000584007	yes	2.3967
XLOC_001622	XLOC_001622	EPHA2	chr1:16450829-16483814	KO	Rescue	OK	19.4988	15.0005	-0.378371	-2.39635	5e-05	0.000584007	yes	2.39635
XLOC_010792	XLOC_010792	-	chr17:8374372-8377515	KO	Rescue	OK	0.260811	0.475103	0.865237	2.39625	5e-05	0.000584007	yes	2.39625
XLOC_010869	XLOC_010869	RNF112	chr17:19314490-19320589	KO	Rescue	OK	0.215857	0.0874837	-1.30299	-2.39578	0.00035	0.00330127	yes	2.39578
XLOC_001341	XLOC_001341	2017-03-02	chr1:220921568-220958229	KO	Rescue	OK	5.9748	8.4306	0.496744	2.39546	5e-05	0.000584007	yes	2.39546
XLOC_000175	XLOC_000175	-	chr1:16508359-16509534	KO	Rescue	OK	0.35672	0.0743869	-2.26167	-2.39472	0.0057	0.0332768	yes	2.39472
XLOC_027753	XLOC_027753	GLDC	chr9:6532463-6645692	KO	Rescue	OK	0.228639	0.105786	-1.11192	-2.39459	0.0003	0.00290318	yes	2.39459
XLOC_029439	XLOC_029439	CD99L2	chrX:149934808-150067289	KO	Rescue	OK	10.0736	7.67901	-0.391591	-2.39232	5e-05	0.000584007	yes	2.39232
XLOC_022389	XLOC_022389	PSMB9	chr6:32821937-32827628	KO	Rescue	OK	2.96652	1.85254	-0.679266	-2.39207	5e-05	0.000584007	yes	2.39207
XLOC_001520	XLOC_001520	MXRA8	chr1:1286790-1293915	KO	Rescue	OK	0.730429	0.328399	-1.15329	-2.39113	0.00025	0.00247504	yes	2.39113
XLOC_011177	XLOC_011177	ITGA3	chr17:48133339-48167874	KO	Rescue	OK	34.1922	26.4097	-0.372602	-2.39054	5e-05	0.000584007	yes	2.39054
XLOC_009895	XLOC_009895	USB1	chr16:58035276-58055527	KO	Rescue	OK	72.8371	56.3584	-0.370043	-2.38834	0.0001	0.00109908	yes	2.38834
XLOC_004384	XLOC_004384	INCENP	chr11:61891294-61922914	KO	Rescue	OK	28.2151	36.7949	0.383042	2.38788	5e-05	0.000584007	yes	2.38788
XLOC_003237	XLOC_003237	SLC35G1	chr10:95653711-95663664	KO	Rescue	OK	4.70718	3.39698	-0.470611	-2.38768	5e-05	0.000584007	yes	2.38768
XLOC_015413	XLOC_015413	DES	chr2:220283098-220291461	KO	Rescue	OK	2.05843	1.23909	-0.732261	-2.38702	0.00015	0.00158822	yes	2.38702
XLOC_010523	XLOC_010523	COG4	chr16:70514471-70557457	KO	Rescue	OK	31.0344	23.9774	-0.372192	-2.38693	5e-05	0.000584007	yes	2.38693
XLOC_008435	XLOC_008435	TRIP11	chr14:92432341-92507843	KO	Rescue	OK	4.8806	3.71444	-0.393916	-2.38677	5e-05	0.000584007	yes	2.38677
XLOC_008220	XLOC_008220	SPTSSA	chr14:34902143-34931468	KO	Rescue	OK	35.9251	27.7055	-0.374818	-2.38546	5e-05	0.000584007	yes	2.38546
XLOC_007342	XLOC_007342	CRYL1	chr13:20977804-21100012	KO	Rescue	OK	4.11819	2.82616	-0.543163	-2.38483	5e-05	0.000584007	yes	2.38483
XLOC_002795	XLOC_002795	LYST	chr1:235824344-236030228	KO	Rescue	OK	1.07347	0.684377	-0.649414	-2.38266	5e-05	0.000584007	yes	2.38266
XLOC_009921	XLOC_009921	SLC9A5	chr16:67282854-67306094	KO	Rescue	OK	0.24692	0.0921032	-1.42272	-2.38263	0.00015	0.00158822	yes	2.38263
XLOC_006805	XLOC_006805	PHLDA1	chr12:76419226-76425556	KO	Rescue	OK	0.937969	1.32287	0.496064	2.38214	0.00025	0.00247504	yes	2.38214
XLOC_008977	XLOC_008977	TICRR	chr15:90118683-90198707	KO	Rescue	OK	9.63978	12.7319	0.401376	2.38157	5e-05	0.000584007	yes	2.38157
XLOC_004742	XLOC_004742	ARCN1	chr11:118443101-118473747	KO	Rescue	OK	67.1456	52.0569	-0.367202	-2.37991	5e-05	0.000584007	yes	2.37991
XLOC_020880	XLOC_020880	-	chr5:784962-786456	KO	Rescue	OK	0.764702	0.336895	-1.1826	-2.37978	0.0002	0.00205279	yes	2.37978
XLOC_024924	XLOC_024924	ZMIZ2	chr7:44788164-44811384	KO	Rescue	OK	9.18638	7.00229	-0.39167	-2.3793	5e-05	0.000584007	yes	2.3793
XLOC_004553	XLOC_004553	FOLR3	chr11:71846770-71889539	KO	Rescue	OK	1.23429	0.122917	-3.32792	-2.3791	0.00015	0.00158822	yes	2.3791
XLOC_004658	XLOC_004658	ENDOD1	chr11:94822973-94865815	KO	Rescue	OK	5.1754	6.81052	0.396096	2.37885	5e-05	0.000584007	yes	2.37885
XLOC_017854	XLOC_017854	ATF4	chr22:39914892-39918809	KO	Rescue	OK	321.074	415.184	0.370844	2.37575	5e-05	0.000584007	yes	2.37575
XLOC_001437	XLOC_001437	EXO1	chr1:242011121-242053241	KO	Rescue	OK	28.1696	36.4003	0.369812	2.37569	5e-05	0.000584007	yes	2.37569
XLOC_017628	XLOC_017628	BCL2L13	chr22:18121349-18213812	KO	Rescue	OK	9.25036	12.0523	0.381731	2.37509	5e-05	0.000584007	yes	2.37509
XLOC_025392	XLOC_025392	AGAP3	chr7:150782907-150841552	KO	Rescue	OK	15.8243	20.801	0.394512	2.37508	5e-05	0.000584007	yes	2.37508
XLOC_018683	XLOC_018683	BBX	chr3:107241782-107530176	KO	Rescue	OK	10.4326	13.5058	0.372483	2.37308	5e-05	0.000584007	yes	2.37308
XLOC_013134	XLOC_013134	SCN1B	chr19:35521591-35531353	KO	Rescue	OK	6.69359	4.79509	-0.481224	-2.37267	5e-05	0.000584007	yes	2.37267
XLOC_019362	XLOC_019362	SUCLG2	chr3:67291178-67705038	KO	Rescue	OK	64.7959	50.1905	-0.36849	-2.37196	5e-05	0.000584007	yes	2.37196
XLOC_005845	XLOC_005845	LYRM5	chr12:25348149-25358030	KO	Rescue	OK	12.8401	9.42633	-0.445884	-2.37033	5e-05	0.000584007	yes	2.37033
XLOC_010084	XLOC_010084	CPNE7	chr16:89642148-89663654	KO	Rescue	OK	2.14968	3.01728	0.489126	2.36995	5e-05	0.000584007	yes	2.36995
XLOC_020383	XLOC_020383	LYAR	chr4:4269428-4291896	KO	Rescue	OK	39.3803	51.1315	0.376738	2.36979	5e-05	0.000584007	yes	2.36979
XLOC_010262	XLOC_010262	-	chr16:16699920-16701555	KO	Rescue	OK	0.198977	0.469573	1.23875	2.36966	0.00035	0.00330127	yes	2.36966
XLOC_017363	XLOC_017363	LRRC3	chr21:45875392-45879530	KO	Rescue	OK	0.130639	0.294913	1.1747	2.36944	5e-05	0.000584007	yes	2.36944
XLOC_005284	XLOC_005284	FIBP	chr11:65647283-65656010	KO	Rescue	OK	39.6847	51.4627	0.374944	2.36915	5e-05	0.000584007	yes	2.36915
XLOC_021468	XLOC_021468	SQSTM1	chr5:179224597-179285846	KO	Rescue	OK	242.5	181.391	-0.418885	-2.36871	0.0001	0.00109908	yes	2.36871
XLOC_004596	XLOC_004596	ACER3	chr11:76571916-76734850	KO	Rescue	OK	4.39495	5.81396	0.403675	2.36844	5e-05	0.000584007	yes	2.36844
XLOC_023342	XLOC_023342	-	chr6:89839837-89853534	KO	Rescue	OK	0.378191	0.166409	-1.18438	-2.3684	0.0006	0.00527906	yes	2.3684
XLOC_007092	XLOC_007092	SPATA13	chr13:24734860-24881212	KO	Rescue	OK	1.72977	2.32996	0.429729	2.36787	5e-05	0.000584007	yes	2.36787
XLOC_017138	XLOC_017138	CTSZ	chr20:57570241-57582309	KO	Rescue	OK	382.762	296.386	-0.368971	-2.3666	5e-05	0.000584007	yes	2.3666
XLOC_001252	XLOC_001252	MDM4	chr1:204485506-204527250	KO	Rescue	OK	5.74648	7.45887	0.376279	2.36589	5e-05	0.000584007	yes	2.36589
XLOC_020614	XLOC_020614	SNCA	chr4:90645249-90763142	KO	Rescue	OK	2.72399	3.72533	0.451645	2.36545	5e-05	0.000584007	yes	2.36545
XLOC_009576	XLOC_009576	RAB26	chr16:2198650-2204141	KO	Rescue	OK	9.47233	6.98966	-0.438498	-2.36528	5e-05	0.000584007	yes	2.36528
XLOC_015289	XLOC_015289	NABP1	chr2:192542797-192562212	KO	Rescue	OK	5.04114	3.69539	-0.448023	-2.36344	5e-05	0.000584007	yes	2.36344
XLOC_010472	XLOC_010472	TK2	chr16:66541903-66584315	KO	Rescue	OK	4.23969	5.59761	0.400853	2.36227	0.0001	0.00109908	yes	2.36227
XLOC_026517	XLOC_026517	CHRAC1	chr8:141521396-141527252	KO	Rescue	OK	42.3253	54.6928	0.36983	2.36141	5e-05	0.000584007	yes	2.36141
XLOC_021778	XLOC_021778	MBLAC2	chr5:89754019-89770585	KO	Rescue	OK	2.321	1.67875	-0.467362	-2.36001	5e-05	0.000584007	yes	2.36001
XLOC_011094	XLOC_011094	-	chr17:41687253-41692243	KO	Rescue	OK	0.243611	0.0737786	-1.7233	-2.35974	0.0012	0.00939869	yes	2.35974
XLOC_004164	XLOC_004164	NAV2	chr11:19372270-20143147	KO	Rescue	OK	5.21695	3.99618	-0.384584	-2.35705	5e-05	0.000584007	yes	2.35705
XLOC_015537	XLOC_015537	TMEM18	chr2:663923-677439	KO	Rescue	OK	8.21531	11.0484	0.427456	2.35677	5e-05	0.000584007	yes	2.35677
XLOC_005676	XLOC_005676	-	chr12:4677722-4679296	KO	Rescue	OK	0.0738245	0.256655	1.79766	2.35609	0.0023	0.0160894	yes	2.35609
XLOC_027087	XLOC_027087	MAFA	chr8:144510229-144512602	KO	Rescue	OK	1.35708	0.87073	-0.640208	-2.35587	5e-05	0.000584007	yes	2.35587
XLOC_016594	XLOC_016594	BPIFA2	chr20:31755959-31769223	KO	Rescue	OK	6.07649	3.59124	-0.758756	-2.35547	5e-05	0.000584007	yes	2.35547
XLOC_001563	XLOC_001563	PLEKHG5,TNFRSF25	chr1:6484830-6580121	KO	Rescue	OK	2.28758	3.5099	0.617609	2.35542	0.00015	0.00158822	yes	2.35542
XLOC_006020	XLOC_006020	RAB5B	chr12:56367696-56390507	KO	Rescue	OK	26.3651	20.4744	-0.364812	-2.35449	5e-05	0.000584007	yes	2.35449
XLOC_007329	XLOC_007329	UPF3A	chr13:115047058-115071291	KO	Rescue	OK	29.212	37.7531	0.370037	2.35408	5e-05	0.000584007	yes	2.35408
XLOC_005238	XLOC_005238	C11orf95	chr11:63527363-63537049	KO	Rescue	OK	4.9664	6.50939	0.390322	2.35392	5e-05	0.000584007	yes	2.35392
XLOC_004842	XLOC_004842	IFITM3	chr11:319672-327313	KO	Rescue	OK	239.923	185.95	-0.367656	-2.35369	5e-05	0.000584007	yes	2.35369
XLOC_010516	XLOC_010516	-	chr16:69768289-69769754	KO	Rescue	OK	0.203365	0.495229	1.28403	2.35158	0.00055	0.00490871	yes	2.35158
XLOC_011881	XLOC_011881	BRCA1	chr17:41196274-41277500	KO	Rescue	OK	10.7292	14.0687	0.390951	2.35153	5e-05	0.000584007	yes	2.35153
XLOC_010873	XLOC_010873	ALDH3A2	chr17:19551478-19580990	KO	Rescue	OK	25.8167	33.279	0.366307	2.35104	5e-05	0.000584007	yes	2.35104
XLOC_011289	XLOC_011289	MAP2K6	chr17:67410822-67550319	KO	Rescue	OK	5.26513	7.92126	0.589261	2.34999	5e-05	0.000584007	yes	2.34999
XLOC_006546	XLOC_006546	TMTC1	chr12:29653745-29937692	KO	Rescue	OK	4.51487	5.8681	0.378208	2.34889	0.0001	0.00109908	yes	2.34889
XLOC_012933	XLOC_012933	PRKCSH	chr19:11546106-11561782	KO	Rescue	OK	106.131	136.62	0.364328	2.34885	5e-05	0.000584007	yes	2.34885
XLOC_005798	XLOC_005798	H2AFJ	chr12:14927269-14930936	KO	Rescue	OK	3.24395	2.36647	-0.455018	-2.34876	5e-05	0.000584007	yes	2.34876
XLOC_020237	XLOC_020237	LSM6	chr4:147096834-147111394	KO	Rescue	OK	19.838	26.8907	0.438837	2.34816	5e-05	0.000584007	yes	2.34816
XLOC_025937	XLOC_025937	UBE2H	chr7:129470571-129592800	KO	Rescue	OK	15.5799	12.0627	-0.369133	-2.34805	5e-05	0.000584007	yes	2.34805
XLOC_014522	XLOC_014522	GP6	chr19:55525074-55549632	KO	Rescue	OK	0.228189	0.0548848	-2.05575	-2.34798	5e-05	0.000584007	yes	2.34798
XLOC_002515	XLOC_002515	KIFAP3	chr1:169890469-170043879	KO	Rescue	OK	10.0971	7.69068	-0.392753	-2.34757	0.0001	0.00109908	yes	2.34757
XLOC_005187	XLOC_005187	MRPL16	chr11:59573607-59578345	KO	Rescue	OK	56.0281	72.4346	0.370529	2.34693	5e-05	0.000584007	yes	2.34693
XLOC_001724	XLOC_001724	-	chr1:27727463-27728156	KO	Rescue	OK	0.621737	0.146849	-2.08197	-2.34681	0.00845	0.0453798	yes	2.34681
XLOC_002249	XLOC_002249	-	chr1:147763023-147768586	KO	Rescue	OK	0.494266	0.154695	-1.67586	-2.34637	0.0008	0.00674826	yes	2.34637
XLOC_002620	XLOC_002620	PHLDA3	chr1:201433524-201438855	KO	Rescue	OK	22.8724	17.3921	-0.395175	-2.34568	5e-05	0.000584007	yes	2.34568
XLOC_004128	XLOC_004128	PARVA	chr11:12399025-12556903	KO	Rescue	OK	20.0174	25.7264	0.361999	2.34236	5e-05	0.000584007	yes	2.34236
XLOC_004103	XLOC_004103	EIF3F	chr11:8008866-8017719	KO	Rescue	OK	175.331	225.287	0.361684	2.34103	5e-05	0.000584007	yes	2.34103
XLOC_007421	XLOC_007421	ENOX1	chr13:43787253-44361475	KO	Rescue	OK	3.44288	5.24441	0.607165	2.34076	0.0001	0.00109908	yes	2.34076
XLOC_009918	XLOC_009918	NOL3	chr16:67204059-67218058	KO	Rescue	OK	14.2015	20.4141	0.523518	2.33956	5e-05	0.000584007	yes	2.33956
XLOC_017113	XLOC_017113	ATP9A	chr20:50213313-50384908	KO	Rescue	OK	9.89192	12.7461	0.365734	2.33665	0.0001	0.00109908	yes	2.33665
XLOC_003211	XLOC_003211	IFIT3	chr10:91087443-91100725	KO	Rescue	OK	3.92719	2.82569	-0.474891	-2.33561	5e-05	0.000584007	yes	2.33561
XLOC_021452	XLOC_021452	-	chr5:177366579-177385468	KO	Rescue	OK	1.17859	0.453032	-1.37938	-2.33448	0.0004	0.00371435	yes	2.33448
XLOC_009919	XLOC_009919	E2F4,ELMO3	chr16:67225998-67238007	KO	Rescue	OK	26.1199	33.8574	0.374324	2.33389	5e-05	0.000584007	yes	2.33389
XLOC_002117	XLOC_002117	SLC16A4	chr1:110905346-110933704	KO	Rescue	OK	1.52547	0.614286	-1.31227	-2.3325	0.00025	0.00247504	yes	2.3325
XLOC_014531	XLOC_014531	HSPBP1	chr19:55773590-55791751	KO	Rescue	OK	30.8039	39.8845	0.372717	2.3324	5e-05	0.000584007	yes	2.3324
XLOC_016172	XLOC_016172	SESTD1	chr2:179966418-180129540	KO	Rescue	OK	3.17892	2.43246	-0.386121	-2.33178	5e-05	0.000584007	yes	2.33178
XLOC_005363	XLOC_005363	CLPB	chr11:71996534-72145724	KO	Rescue	OK	13.3659	17.8206	0.414993	2.32928	5e-05	0.000584007	yes	2.32928
XLOC_011981	XLOC_011981	SP6	chr17:45922279-45933240	KO	Rescue	OK	1.18465	0.802668	-0.561586	-2.32907	5e-05	0.000584007	yes	2.32907
XLOC_006862	XLOC_006862	CCDC41	chr12:94542498-94853764	KO	Rescue	OK	3.94044	5.34546	0.439957	2.3288	5e-05	0.000584007	yes	2.3288
XLOC_021416	XLOC_021416	ATP6V0E1	chr5:172410762-172461900	KO	Rescue	OK	87.1369	67.4204	-0.370098	-2.32874	5e-05	0.000584007	yes	2.32874
XLOC_019631	XLOC_019631	IFT80	chr3:159974773-160117320	KO	Rescue	OK	5.61281	4.24519	-0.402893	-2.32843	5e-05	0.000584007	yes	2.32843
XLOC_025401	XLOC_025401	ACTR3B	chr7:152456813-152552464	KO	Rescue	OK	4.24051	5.83385	0.460209	2.3279	5e-05	0.000584007	yes	2.3279
XLOC_014253	XLOC_014253	PSG1	chr19:43370612-43383871	KO	Rescue	OK	0.291124	0.0963607	-1.59512	-2.3271	0.0001	0.00109908	yes	2.3271
XLOC_025737	XLOC_025737	SEMA3C	chr7:80371853-80548667	KO	Rescue	OK	13.1636	10.1906	-0.369318	-2.32589	5e-05	0.000584007	yes	2.32589
XLOC_016759	XLOC_016759	ZNF831	chr20:57734352-57834183	KO	Rescue	OK	15.3477	11.5069	-0.415521	-2.3256	5e-05	0.000584007	yes	2.3256
XLOC_017798	XLOC_017798	HMOX1	chr22:35777059-35790207	KO	Rescue	OK	10.1795	13.5267	0.410149	2.32341	5e-05	0.000584007	yes	2.32341
XLOC_020729	XLOC_020729	TBC1D9	chr4:141541935-141677471	KO	Rescue	OK	8.02423	6.17753	-0.377332	-2.32225	0.0001	0.00109908	yes	2.32225
XLOC_012051	XLOC_012051	RNF43	chr17:56378587-56494997	KO	Rescue	OK	3.63673	1.79026	-1.02247	-2.32039	0.0003	0.00290318	yes	2.32039
XLOC_001866	XLOC_001866	-	chr1:44638867-44640272	KO	Rescue	OK	0.0562145	0.444877	2.98439	2.32001	0.0031	0.0203362	yes	2.32001
XLOC_020706	XLOC_020706	PGRMC2	chr4:129190391-129209984	KO	Rescue	OK	45.3867	35.3865	-0.35907	-2.31919	5e-05	0.000584007	yes	2.31919
XLOC_014799	XLOC_014799	SPTBN1	chr2:54683453-54898583	KO	Rescue	OK	71.7909	55.6203	-0.368189	-2.31851	0.0001	0.00109908	yes	2.31851
XLOC_016726	XLOC_016726	BCAS4	chr20:49411466-49493714	KO	Rescue	OK	0.770012	0.355347	-1.11565	-2.31796	0.0002	0.00205279	yes	2.31796
XLOC_005064	XLOC_005064	-	chr11:32509984-32511599	KO	Rescue	OK	0.631484	1.09444	0.793381	2.31758	5e-05	0.000584007	yes	2.31758
XLOC_013190	XLOC_013190	ZNF527	chr19:37862058-37883966	KO	Rescue	OK	0.318106	0.503589	0.662738	2.31718	5e-05	0.000584007	yes	2.31718
XLOC_004001	XLOC_004001	PTDSS2	chr11:450257-491389	KO	Rescue	OK	9.98649	13.0799	0.389305	2.31612	5e-05	0.000584007	yes	2.31612
XLOC_028034	XLOC_028034	BARX1	chr9:96713908-96717608	KO	Rescue	OK	19.4255	25.336	0.383232	2.31516	5e-05	0.000584007	yes	2.31516
XLOC_014755	XLOC_014755	-	chr2:42162497-42224234	KO	Rescue	OK	0.891827	0.105317	-3.08203	-2.31511	0.00095	0.00774839	yes	2.31511
XLOC_012745	XLOC_012745	PALM	chr19:708773-748330	KO	Rescue	OK	29.6104	22.9335	-0.368646	-2.31508	5e-05	0.000584007	yes	2.31508
XLOC_008818	XLOC_008818	-	chr15:67135192-67137689	KO	Rescue	OK	0.226097	0.087699	-1.36631	-2.31507	0.00065	0.0056743	yes	2.31507
XLOC_004362	XLOC_004362	TMEM109	chr11:60681370-60690915	KO	Rescue	OK	58.2887	74.7319	0.358508	2.31399	5e-05	0.000584007	yes	2.31399
XLOC_020961	XLOC_020961	SKP2	chr5:36152144-36184142	KO	Rescue	OK	65.533	85.9621	0.391479	2.31375	0.00025	0.00247504	yes	2.31375
XLOC_006811	XLOC_006811	-	chr12:77091249-77093649	KO	Rescue	OK	0.279513	0.0870789	-1.68252	-2.31325	0.001	0.00809319	yes	2.31325
XLOC_000967	XLOC_000967	EFNA3	chr1:155051335-155060014	KO	Rescue	OK	3.83909	5.3761	0.485793	2.31126	0.0001	0.00109908	yes	2.31126
XLOC_011251	XLOC_011251	TANC2	chr17:60778674-61505147	KO	Rescue	OK	5.82981	7.51929	0.367147	2.31102	5e-05	0.000584007	yes	2.31102
XLOC_025843	XLOC_025843	RASA4	chr7:102220092-102257205	KO	Rescue	OK	1.12483	0.791968	-0.506189	-2.31038	5e-05	0.000584007	yes	2.31038
XLOC_011886	XLOC_011886	-	chr17:41415875-41438713	KO	Rescue	OK	4.40634	2.82321	-0.642241	-2.30946	5e-05	0.000584007	yes	2.30946
XLOC_016831	XLOC_016831	-	chr20:293091-295536	KO	Rescue	OK	0.154899	0.336301	1.11843	2.30892	0.00045	0.00411481	yes	2.30892
XLOC_013195	XLOC_013195	SIPA1L3	chr19:38397838-38699151	KO	Rescue	OK	7.30048	9.94097	0.445396	2.30823	0.00015	0.00158822	yes	2.30823
XLOC_001427	XLOC_001427	MTR	chr1:236958562-237067281	KO	Rescue	OK	6.29251	8.097	0.363752	2.30754	5e-05	0.000584007	yes	2.30754
XLOC_027325	XLOC_027325	ANXA1	chr9:75766780-75785307	KO	Rescue	OK	137.3	107.161	-0.357544	-2.30667	5e-05	0.000584007	yes	2.30667
XLOC_020872	XLOC_020872	-	chr5:259508-265213	KO	Rescue	OK	0.167595	0.288921	0.785697	2.30589	0.0002	0.00205279	yes	2.30589
XLOC_011733	XLOC_011733	MMP28	chr17:34092875-34122683	KO	Rescue	OK	1.77427	2.93504	0.726156	2.30479	5e-05	0.000584007	yes	2.30479
XLOC_014989	XLOC_014989	NPAS2	chr2:101436573-101613287	KO	Rescue	OK	2.00401	2.92967	0.547846	2.30459	5e-05	0.000584007	yes	2.30459
XLOC_027337	XLOC_027337	PSAT1	chr9:80912058-80945009	KO	Rescue	OK	68.9006	88.1992	0.356249	2.30407	5e-05	0.000584007	yes	2.30407
XLOC_008863	XLOC_008863	PML	chr15:74287013-74340155	KO	Rescue	OK	6.21342	4.64143	-0.420818	-2.30344	5e-05	0.000584007	yes	2.30344
XLOC_017255	XLOC_017255	C21orf119	chr21:33765441-33766266	KO	Rescue	OK	2.34633	1.35201	-0.795306	-2.30265	0.00025	0.00247504	yes	2.30265
XLOC_001243	XLOC_001243	ATP2B4	chr1:203595913-203713209	KO	Rescue	OK	8.90798	6.91461	-0.36545	-2.30126	0.00015	0.00158822	yes	2.30126
XLOC_017493	XLOC_017493	TCP10L	chr21:33947150-33957845	KO	Rescue	OK	0.392113	0.199086	-0.977881	-2.30048	0.00035	0.00330127	yes	2.30048
XLOC_019667	XLOC_019667	TBL1XR1	chr3:176738541-176915788	KO	Rescue	OK	22.8753	29.3276	0.358469	2.30032	5e-05	0.000584007	yes	2.30032
XLOC_012204	XLOC_012204	USP36	chr17:76783431-76836976	KO	Rescue	OK	23.2464	30.4756	0.390646	2.29926	5e-05	0.000584007	yes	2.29926
XLOC_018141	XLOC_018141	FOXRED2	chr22:36883232-36903148	KO	Rescue	OK	32.4118	41.4836	0.356024	2.29829	5e-05	0.000584007	yes	2.29829
XLOC_018440	XLOC_018440	-	chr3:39462002-39463773	KO	Rescue	OK	0.292737	0.105166	-1.47694	-2.29763	0.0009	0.00744933	yes	2.29763
XLOC_016112	XLOC_016112	-	chr2:165522861-165524386	KO	Rescue	OK	0.0913732	0.288177	1.65711	2.29673	0.0016	0.0119348	yes	2.29673
XLOC_027746	XLOC_027746	PLGRKT	chr9:5357966-5437937	KO	Rescue	OK	14.7534	10.9262	-0.433261	-2.2966	5e-05	0.000584007	yes	2.2966
XLOC_007542	XLOC_007542	ABCC4	chr13:95672082-95954063	KO	Rescue	OK	17.9417	23.0846	0.36361	2.2964	5e-05	0.000584007	yes	2.2964
XLOC_029337	XLOC_029337	APLN	chrX:128779235-128788933	KO	Rescue	OK	0.588743	0.351412	-0.744477	-2.29614	5e-05	0.000584007	yes	2.29614
XLOC_010967	XLOC_010967	CCL2	chr17:32582295-32584220	KO	Rescue	OK	6.38715	4.27918	-0.577837	-2.29568	0.0001	0.00109908	yes	2.29568
XLOC_009125	XLOC_009125	BMF	chr15:40380090-40401085	KO	Rescue	OK	0.343131	0.191685	-0.840019	-2.29547	0.0002	0.00205279	yes	2.29547
XLOC_010062	XLOC_010062	SNAI3-AS1	chr16:88729780-88753594	KO	Rescue	OK	1.05305	0.580602	-0.858953	-2.29507	0.0001	0.00109908	yes	2.29507
XLOC_020459	XLOC_020459	TLR6	chr4:38824589-38859371	KO	Rescue	OK	0.586787	0.391007	-0.585643	-2.29489	5e-05	0.000584007	yes	2.29489
XLOC_021005	XLOC_021005	ITGA2	chr5:52285155-52390609	KO	Rescue	OK	1.02832	0.740954	-0.472836	-2.29486	5e-05	0.000584007	yes	2.29486
XLOC_002245	XLOC_002245	ACP6	chr1:147119167-147142634	KO	Rescue	OK	0.545926	0.269095	-1.02059	-2.29037	0.00065	0.0056743	yes	2.29037
XLOC_007711	XLOC_007711	AKAP6	chr14:32755172-33302268	KO	Rescue	OK	0.54597	0.295739	-0.884499	-2.29036	0.0001	0.00109908	yes	2.29036
XLOC_007385	XLOC_007385	HSPH1	chr13:31710762-31736330	KO	Rescue	OK	61.5089	78.5691	0.353167	2.28908	0.0001	0.00109908	yes	2.28908
XLOC_027189	XLOC_027189	ACER2	chr9:19408924-19455173	KO	Rescue	OK	1.39786	0.957641	-0.545666	-2.28864	5e-05	0.000584007	yes	2.28864
XLOC_018093	XLOC_018093	TBC1D10A	chr22:30687978-30722955	KO	Rescue	OK	4.63602	3.36652	-0.461631	-2.2881	5e-05	0.000584007	yes	2.2881
XLOC_004982	XLOC_004982	RNF141	chr11:10533224-10562774	KO	Rescue	OK	13.3634	17.1779	0.362259	2.28589	5e-05	0.000584007	yes	2.28589
XLOC_020163	XLOC_020163	ENPEP	chr4:111397228-111484493	KO	Rescue	OK	0.403266	0.61952	0.619421	2.28538	0.0001	0.00109908	yes	2.28538
XLOC_028242	XLOC_028242	FAM78A	chr9:134133464-134153569	KO	Rescue	OK	2.71028	3.6415	0.426091	2.28465	0.00015	0.00158822	yes	2.28465
XLOC_023523	XLOC_023523	-	chr6:154709260-154710781	KO	Rescue	OK	0.0816056	0.268686	1.71918	2.28396	0.002	0.0143871	yes	2.28396
XLOC_006616	XLOC_006616	-	chr12:49324945-49326035	KO	Rescue	OK	6.54521	4.62777	-0.500121	-2.28334	5e-05	0.000584007	yes	2.28334
XLOC_013499	XLOC_013499	ZNF331	chr19:54024176-54083523	KO	Rescue	OK	4.67391	6.12557	0.390212	2.28322	5e-05	0.000584007	yes	2.28322
XLOC_011162	XLOC_011162	-	chr17:46948914-46950287	KO	Rescue	OK	0.29169	0.0583909	-2.32062	-2.28268	0.0066	0.0372592	yes	2.28268
XLOC_013422	XLOC_013422	RCN3	chr19:50030874-50046890	KO	Rescue	OK	35.4952	27.5851	-0.363735	-2.28218	0.0001	0.00109908	yes	2.28218
XLOC_018849	XLOC_018849	ACPL2	chr3:140950681-141013486	KO	Rescue	OK	0.341526	0.171933	-0.990151	-2.28132	0.00025	0.00247504	yes	2.28132
XLOC_010992	XLOC_010992	DHRS11	chr17:34948225-34957233	KO	Rescue	OK	12.5416	16.4973	0.395515	2.28027	0.00015	0.00158822	yes	2.28027
XLOC_005779	XLOC_005779	CREBL2	chr12:12764830-12798041	KO	Rescue	OK	18.5026	14.4026	-0.361402	-2.27811	5e-05	0.000584007	yes	2.27811
XLOC_000197	XLOC_000197	C1orf151-NBL1,MINOS1,NBL1	chr1:19923470-19984949	KO	Rescue	OK	39.0231	30.0187	-0.378466	-2.27802	0.0001	0.00109908	yes	2.27802
XLOC_005216	XLOC_005216	C11orf48	chr11:62430288-62441162	KO	Rescue	OK	31.5019	43.1379	0.453517	2.27795	5e-05	0.000584007	yes	2.27795
XLOC_010668	XLOC_010668	C17orf97	chr17:260061-264464	KO	Rescue	OK	1.38345	2.08677	0.593002	2.27793	0.0001	0.00109908	yes	2.27793
XLOC_015792	XLOC_015792	FAM136A	chr2:70523107-70529220	KO	Rescue	OK	52.1097	66.6428	0.354898	2.27656	5e-05	0.000584007	yes	2.27656
XLOC_017423	XLOC_017423	NRIP1	chr21:16333387-16437389	KO	Rescue	OK	10.2647	13.1431	0.356617	2.27643	5e-05	0.000584007	yes	2.27643
XLOC_017295	XLOC_017295	SH3BGR	chr21:40777496-40887433	KO	Rescue	OK	2.54699	1.25858	-1.017	-2.27592	0.0002	0.00205279	yes	2.27592
XLOC_005049	XLOC_005049	-	chr11:27350920-27352774	KO	Rescue	OK	0.607098	1.02208	0.751509	2.2757	0.00025	0.00247504	yes	2.2757
XLOC_012979	XLOC_012979	CD97	chr19:14491955-14519537	KO	Rescue	OK	30.9678	24.1897	-0.356372	-2.2753	0.00015	0.00158822	yes	2.2753
XLOC_027869	XLOC_027869	FAM214B	chr9:35104117-35115893	KO	Rescue	OK	3.22385	2.35747	-0.451544	-2.27506	5e-05	0.000584007	yes	2.27506
XLOC_020657	XLOC_020657	COL25A1	chr4:109729880-110223799	KO	Rescue	OK	1.4013	1.9034	0.441812	2.27262	0.0001	0.00109908	yes	2.27262
XLOC_020891	XLOC_020891	KIAA0947	chr5:5422785-5490347	KO	Rescue	OK	27.4267	34.983	0.351072	2.27186	0.00015	0.00158822	yes	2.27186
XLOC_001664	XLOC_001664	HP1BP3	chr1:21068062-21114018	KO	Rescue	OK	40.919	53.6181	0.389951	2.27149	0.0002	0.00205279	yes	2.27149
XLOC_013881	XLOC_013881	OLFM2	chr19:9964392-10047070	KO	Rescue	OK	1.92674	2.74687	0.511628	2.27037	0.0001	0.00109908	yes	2.27037
XLOC_009329	XLOC_009329	LARP6	chr15:71123888-71146498	KO	Rescue	OK	4.29777	2.44934	-0.811197	-2.26919	0.00015	0.00158822	yes	2.26919
XLOC_003934	XLOC_003934	NSMCE4A	chr10:123716602-123734780	KO	Rescue	OK	23.9764	31.0045	0.370863	2.26832	0.0001	0.00109908	yes	2.26832
XLOC_010514	XLOC_010514	NQO1	chr16:69743303-69760533	KO	Rescue	OK	181.343	232.196	0.356625	2.26746	0.0002	0.00205279	yes	2.26746
XLOC_025050	XLOC_025050	RHBDD2	chr7:75508316-75518244	KO	Rescue	OK	32.9648	25.6082	-0.364321	-2.26675	0.0001	0.00109908	yes	2.26675
XLOC_007926	XLOC_007926	IFI27L1	chr14:94547581-94569095	KO	Rescue	OK	10.1849	7.13547	-0.513354	-2.26672	0.0001	0.00109908	yes	2.26672
XLOC_015321	XLOC_015321	STRADB	chr2:202316391-202345574	KO	Rescue	OK	5.75589	7.63312	0.407235	2.26618	5e-05	0.000584007	yes	2.26618
XLOC_026781	XLOC_026781	ATP6V1H	chr8:54628102-54756096	KO	Rescue	OK	43.5819	34.049	-0.356116	-2.26575	5e-05	0.000584007	yes	2.26575
XLOC_020987	XLOC_020987	NIM1	chr5:43191851-43280952	KO	Rescue	OK	0.343404	0.612321	0.834383	2.26515	0.0002	0.00205279	yes	2.26515
XLOC_029344	XLOC_029344	ZNF280C	chrX:129336629-129402922	KO	Rescue	OK	1.71691	2.32334	0.436383	2.26128	5e-05	0.000584007	yes	2.26128
XLOC_017171	XLOC_017171	HELZ2	chr20:62189438-62205592	KO	Rescue	OK	1.15989	0.845305	-0.456444	-2.26122	5e-05	0.000584007	yes	2.26122
XLOC_015848	XLOC_015848	TRABD2A	chr2:85048778-85108528	KO	Rescue	OK	29.7516	39.4454	0.406892	2.2595	5e-05	0.000584007	yes	2.2595
XLOC_019296	XLOC_019296	PCBP4	chr3:51989329-52001527	KO	Rescue	OK	3.00702	2.1121	-0.50966	-2.25854	5e-05	0.000584007	yes	2.25854
XLOC_019731	XLOC_019731	-	chr3:193991065-193994133	KO	Rescue	OK	0.438637	0.9395	1.09886	2.25796	0.0002	0.00205279	yes	2.25796
XLOC_016087	XLOC_016087	NR4A2	chr2:157180943-157190979	KO	Rescue	OK	4.11423	5.4369	0.40216	2.2575	5e-05	0.000584007	yes	2.2575
XLOC_003021	XLOC_003021	SYT15	chr10:46951455-46972892	KO	Rescue	OK	3.71744	2.57196	-0.53144	-2.2568	0.0003	0.00290318	yes	2.2568
XLOC_005109	XLOC_005109	ARFGAP2,PACSIN3	chr11:46958250-47208188	KO	Rescue	OK	53.4166	70.6942	0.404303	2.25674	0.0001	0.00109908	yes	2.25674
XLOC_019462	XLOC_019462	LRRC58	chr3:120043575-120068186	KO	Rescue	OK	31.301	39.8651	0.34892	2.25657	5e-05	0.000584007	yes	2.25657
XLOC_019131	XLOC_019131	TBC1D5	chr3:17198653-17784240	KO	Rescue	OK	6.54009	5.0672	-0.368121	-2.25479	0.0001	0.00109908	yes	2.25479
XLOC_022072	XLOC_022072	UIMC1	chr5:176332005-176433820	KO	Rescue	OK	12.3325	15.9275	0.369063	2.25365	0.00015	0.00158822	yes	2.25365
XLOC_000098	XLOC_000098	SPSB1	chr1:9352940-9429592	KO	Rescue	OK	5.27524	6.92021	0.391579	2.2535	5e-05	0.000584007	yes	2.2535
XLOC_022951	XLOC_022951	TPMT	chr6:18128544-18155374	KO	Rescue	OK	18.2551	14.2266	-0.359712	-2.25349	5e-05	0.000584007	yes	2.25349
XLOC_025782	XLOC_025782	ASNS	chr7:97481428-97501854	KO	Rescue	OK	20.4249	26.2485	0.361907	2.25343	5e-05	0.000584007	yes	2.25343
XLOC_002984	XLOC_002984	ZNF37A	chr10:38383263-38413674	KO	Rescue	OK	4.74423	6.13756	0.371492	2.25277	0.00015	0.00158822	yes	2.25277
XLOC_023307	XLOC_023307	COL12A1	chr6:75794038-75915925	KO	Rescue	OK	43.2901	55.6374	0.362017	2.25187	0.0001	0.00109908	yes	2.25187
XLOC_012185	XLOC_012185	UBE2O	chr17:74385611-74449291	KO	Rescue	OK	15.2248	19.4332	0.352107	2.25108	5e-05	0.000584007	yes	2.25108
XLOC_002753	XLOC_002753	WNT9A	chr1:228106359-228135697	KO	Rescue	OK	3.20979	2.26027	-0.505987	-2.24998	0.0001	0.00109908	yes	2.24998
XLOC_000242	XLOC_000242	CLIC4	chr1:25071759-25170815	KO	Rescue	OK	73.8118	57.987	-0.348121	-2.24977	5e-05	0.000584007	yes	2.24977
XLOC_028786	XLOC_028786	ZBTB33	chrX:119384606-119392251	KO	Rescue	OK	8.92312	11.4455	0.359162	2.24935	5e-05	0.000584007	yes	2.24935
XLOC_014608	XLOC_014608	-	chr2:879404-881209	KO	Rescue	OK	0.104914	0.283263	1.43293	2.24894	0.00145	0.011002	yes	2.24894
XLOC_029376	XLOC_029376	MOSPD1	chrX:134021654-134049809	KO	Rescue	OK	18.4271	14.2791	-0.367925	-2.24763	0.0001	0.00109908	yes	2.24763
XLOC_004226	XLOC_004226	TTC17	chr11:43380431-43516483	KO	Rescue	OK	15.9619	20.4917	0.360406	2.24612	5e-05	0.000584007	yes	2.24612
XLOC_020234	XLOC_020234	SMAD1	chr4:146402714-146480326	KO	Rescue	OK	7.43155	9.66921	0.379734	2.24578	0.0002	0.00205279	yes	2.24578
XLOC_006748	XLOC_006748	STAT6	chr12:57482563-57506034	KO	Rescue	OK	27.2876	35.5151	0.380186	2.24502	5e-05	0.000584007	yes	2.24502
XLOC_001278	XLOC_001278	PFKFB2	chr1:207226397-207254368	KO	Rescue	OK	10.5157	8.12382	-0.372308	-2.24475	5e-05	0.000584007	yes	2.24475
XLOC_005472	XLOC_005472	CWC15	chr11:94695786-94706776	KO	Rescue	OK	42.2134	53.9639	0.354294	2.24438	0.00015	0.00158822	yes	2.24438
XLOC_025424	XLOC_025424	PDGFA	chr7:536476-559870	KO	Rescue	OK	4.9967	6.60434	0.402439	2.24301	5e-05	0.000584007	yes	2.24301
XLOC_005227	XLOC_005227	CHRM1	chr11:62676150-62689012	KO	Rescue	OK	0.250585	0.111868	-1.16351	-2.24271	0.00075	0.00639082	yes	2.24271
XLOC_006680	XLOC_006680	KRT8	chr12:53290970-53346685	KO	Rescue	OK	2118.29	1386.72	-0.611224	-2.23967	0.00015	0.00158822	yes	2.23967
XLOC_005285	XLOC_005285	FOSL1	chr11:65657688-65668026	KO	Rescue	OK	3.03295	6.65704	1.13416	2.23812	0.0007	0.00603534	yes	2.23812
XLOC_027541	XLOC_027541	CDK9,MIR2861,MIR3960	chr9:130547786-130558919	KO	Rescue	OK	23.0262	29.525	0.358661	2.23676	0.0004	0.00371435	yes	2.23676
XLOC_007362	XLOC_007362	MTMR6	chr13:25820340-25861704	KO	Rescue	OK	8.92442	6.95035	-0.360672	-2.23627	0.0001	0.00109908	yes	2.23627
XLOC_019548	XLOC_019548	-	chr3:134031137-134047210	KO	Rescue	OK	0.497221	0.138894	-1.83991	-2.2353	0.0004	0.00371435	yes	2.2353
XLOC_020285	XLOC_020285	TLL1	chr4:166794271-167025609	KO	Rescue	OK	10.9378	8.36467	-0.386949	-2.23158	0.00015	0.00158822	yes	2.23158
XLOC_002227	XLOC_002227	PDE4DIP	chr1:144835267-145076186	KO	Rescue	OK	6.27982	4.52058	-0.474215	-2.23063	5e-05	0.000584007	yes	2.23063
XLOC_003140	XLOC_003140	-	chr10:76471935-76475743	KO	Rescue	OK	0.504344	0.307312	-0.714702	-2.2304	0.0002	0.00205279	yes	2.2304
XLOC_000090	XLOC_000090	PER3	chr1:7844273-7905237	KO	Rescue	OK	2.60354	3.40617	0.387674	2.23021	0.00015	0.00158822	yes	2.23021
XLOC_011089	XLOC_011089	-	chr17:41399692-41401769	KO	Rescue	OK	0.456237	0.85616	0.908096	2.23016	0.00025	0.00247504	yes	2.23016
XLOC_010344	XLOC_010344	CDIPT	chr16:29869677-29874578	KO	Rescue	OK	23.9826	18.6561	-0.362337	-2.22882	5e-05	0.000584007	yes	2.22882
XLOC_006523	XLOC_006523	KRAS	chr12:25358179-25403854	KO	Rescue	OK	22.7228	28.8059	0.342224	2.22863	0.00035	0.00330127	yes	2.22863
XLOC_008369	XLOC_008369	DPF3	chr14:73128744-73360809	KO	Rescue	OK	0.477521	0.259048	-0.882344	-2.22822	0.0003	0.00290318	yes	2.22822
XLOC_001796	XLOC_001796	STK40	chr1:36805224-36851696	KO	Rescue	OK	4.4851	5.86299	0.386497	2.2272	0.0002	0.00205279	yes	2.2272
XLOC_011308	XLOC_011308	TMEM104	chr17:72772621-72835922	KO	Rescue	OK	5.87616	4.52844	-0.375857	-2.2269	0.0001	0.00109908	yes	2.2269
XLOC_003459	XLOC_003459	ADARB2	chr10:1223247-1779868	KO	Rescue	OK	4.86205	9.15883	0.913599	2.22684	0.0002	0.00205279	yes	2.22684
XLOC_015450	XLOC_015450	ARMC9	chr2:232063293-232243020	KO	Rescue	OK	2.92773	2.07045	-0.499836	-2.22594	0.0001	0.00109908	yes	2.22594
XLOC_004606	XLOC_004606	-	chr11:81349265-81350195	KO	Rescue	OK	0.0545042	0.360195	2.72434	2.22584	0.0026	0.0177727	yes	2.22584
XLOC_021829	XLOC_021829	PPIC	chr5:122359077-122372425	KO	Rescue	OK	6.29086	4.52772	-0.474472	-2.22569	0.00025	0.00247504	yes	2.22569
XLOC_025812	XLOC_025812	GATS	chr7:99775537-99870127	KO	Rescue	OK	1.88489	1.3232	-0.510456	-2.22532	5e-05	0.000584007	yes	2.22532
XLOC_007955	XLOC_007955	EVL	chr14:100437745-100610575	KO	Rescue	OK	28.4422	22.1757	-0.359056	-2.22302	5e-05	0.000584007	yes	2.22302
XLOC_018053	XLOC_018053	DDT	chr22:24309025-24322019	KO	Rescue	OK	51.739	67.6192	0.386181	2.22224	0.0002	0.00205279	yes	2.22224
XLOC_018518	XLOC_018518	ARIH2	chr3:48955220-49022971	KO	Rescue	OK	24.3223	32.4509	0.415974	2.22208	0.0001	0.00109908	yes	2.22208
XLOC_013301	XLOC_013301	BCL3	chr19:45245581-45263302	KO	Rescue	OK	18.9801	14.5396	-0.384496	-2.22207	0.0003	0.00290318	yes	2.22207
XLOC_004145	XLOC_004145	-	chr11:17364737-17367053	KO	Rescue	OK	0.569945	0.318015	-0.841731	-2.21918	0.0003	0.00290318	yes	2.21918
XLOC_020463	XLOC_020463	UGDH	chr4:39500374-39529218	KO	Rescue	OK	11.3814	14.5925	0.358547	2.21842	0.0001	0.00109908	yes	2.21842
XLOC_012314	XLOC_012314	SMCHD1	chr18:2655885-2805015	KO	Rescue	OK	15.4313	19.5798	0.343513	2.21795	5e-05	0.000584007	yes	2.21795
XLOC_008673	XLOC_008673	DISP2	chr15:40650433-40663256	KO	Rescue	OK	0.500149	0.320479	-0.642128	-2.21792	0.0003	0.00290318	yes	2.21792
XLOC_001564	XLOC_001564	NOL9	chr1:6581303-6614658	KO	Rescue	OK	8.62737	10.9799	0.347869	2.21767	0.0001	0.00109908	yes	2.21767
XLOC_004448	XLOC_004448	-	chr11:65090679-65097738	KO	Rescue	OK	0.497228	0.299109	-0.733238	-2.21618	0.0004	0.00371435	yes	2.21618
XLOC_004968	XLOC_004968	ST5	chr11:8713824-8932498	KO	Rescue	OK	4.38827	5.79387	0.400875	2.21583	0.0002	0.00205279	yes	2.21583
XLOC_006238	XLOC_006238	FAM222A	chr12:110152186-110211294	KO	Rescue	OK	2.99023	2.16568	-0.465437	-2.21522	0.00015	0.00158822	yes	2.21522
XLOC_018291	XLOC_018291	SETMAR	chr3:4344986-4363052	KO	Rescue	OK	6.27786	8.67144	0.465999	2.21474	0.0001	0.00109908	yes	2.21474
XLOC_019493	XLOC_019493	SLC41A3	chr3:125725038-125820391	KO	Rescue	OK	6.34827	4.75013	-0.418397	-2.21453	5e-05	0.000584007	yes	2.21453
XLOC_025577	XLOC_025577	LOC100506895	chr7:43152197-43602938	KO	Rescue	OK	0.310059	0.0967461	-1.68027	-2.21376	0.0037	0.0234022	yes	2.21376
XLOC_004230	XLOC_004230	HSD17B12	chr11:43702142-43881874	KO	Rescue	OK	7.5544	9.98581	0.402562	2.21335	0.0001	0.00109908	yes	2.21335
XLOC_004451	XLOC_004451	DPF2	chr11:65100762-65121735	KO	Rescue	OK	22.0503	28.1154	0.350561	2.21221	0.0001	0.00109908	yes	2.21221
XLOC_015329	XLOC_015329	FAM117B	chr2:203499900-203634480	KO	Rescue	OK	4.10919	5.3076	0.369204	2.21198	0.0001	0.00109908	yes	2.21198
XLOC_000982	XLOC_000982	-	chr1:155591829-155593474	KO	Rescue	OK	0.215423	0.0559647	-1.94458	-2.21155	0.0022	0.015526	yes	2.21155
XLOC_010415	XLOC_010415	NETO2	chr16:47115430-47178168	KO	Rescue	OK	30.6639	24.1239	-0.346079	-2.21108	5e-05	0.000584007	yes	2.21108
XLOC_004372	XLOC_004372	SDHAF2	chr11:61197596-61214239	KO	Rescue	OK	31.8477	40.8405	0.35881	2.21108	5e-05	0.000584007	yes	2.21108
XLOC_001692	XLOC_001692	MYOM3	chr1:24382530-24438665	KO	Rescue	OK	0.467231	0.304343	-0.618435	-2.21087	5e-05	0.000584007	yes	2.21087
XLOC_021504	XLOC_021504	-	chr5:730569-732709	KO	Rescue	OK	1.75419	0.871468	-1.00929	-2.20815	0.00035	0.00330127	yes	2.20815
XLOC_019120	XLOC_019120	SH3BP5	chr3:15247647-15382901	KO	Rescue	OK	30.3345	40.7059	0.424282	2.20806	0.0001	0.00109908	yes	2.20806
XLOC_004143	XLOC_004143	NUCB2	chr11:17298259-17360358	KO	Rescue	OK	22.5705	17.3358	-0.380684	-2.20581	0.0002	0.00205279	yes	2.20581
XLOC_013749	XLOC_013749	DIRAS1	chr19:2714564-2721390	KO	Rescue	OK	3.19113	2.37013	-0.429101	-2.20496	0.00015	0.00158822	yes	2.20496
XLOC_013132	XLOC_013132	ZNF30	chr19:35417806-35436076	KO	Rescue	OK	0.544701	0.86695	0.670485	2.20495	0.00025	0.00247504	yes	2.20495
XLOC_012053	XLOC_012053	MTMR4	chr17:56566892-56595251	KO	Rescue	OK	11.7537	14.9424	0.346299	2.20454	5e-05	0.000584007	yes	2.20454
XLOC_018594	XLOC_018594	-	chr3:58312843-58313936	KO	Rescue	OK	0.372775	0.103651	-1.84657	-2.20242	0.0021	0.0149779	yes	2.20242
XLOC_003728	XLOC_003728	-	chr10:79536999-79549968	KO	Rescue	OK	0.672639	0.460724	-0.545929	-2.20177	0.00025	0.00247504	yes	2.20177
XLOC_002447	XLOC_002447	COPA	chr1:160258376-160328742	KO	Rescue	OK	66.7462	50.6611	-0.397806	-2.20093	0.00025	0.00247504	yes	2.20093
XLOC_005011	XLOC_005011	PSMA1	chr11:14526418-14895561	KO	Rescue	OK	207.202	270.709	0.385707	2.20088	0.00015	0.00158822	yes	2.20088
XLOC_012773	XLOC_012773	MUM1	chr19:1354871-1378430	KO	Rescue	OK	7.50517	9.60547	0.355972	2.20055	5e-05	0.000584007	yes	2.20055
XLOC_018677	XLOC_018677	NFKBIZ,NXPE3	chr3:101498028-101579869	KO	Rescue	OK	5.24201	3.94199	-0.411196	-2.19751	5e-05	0.000584007	yes	2.19751
XLOC_022583	XLOC_022583	TPBG	chr6:83072922-83077133	KO	Rescue	OK	4.01371	2.99017	-0.424712	-2.19713	0.00025	0.00247504	yes	2.19713
XLOC_014023	XLOC_014023	JUND	chr19:18390562-18392453	KO	Rescue	OK	70.8751	55.9382	-0.341443	-2.19671	0.00015	0.00158822	yes	2.19671
XLOC_004232	XLOC_004232	ALKBH3	chr11:43902343-43943039	KO	Rescue	OK	9.52678	12.5686	0.399769	2.19604	0.0002	0.00205279	yes	2.19604
XLOC_007927	XLOC_007927	IFI27	chr14:94577078-94583033	KO	Rescue	OK	0.892768	0.277036	-1.68821	-2.19599	0.0008	0.00674826	yes	2.19599
XLOC_019094	XLOC_019094	SEC13	chr3:10342612-10362894	KO	Rescue	OK	103.034	81.3205	-0.341431	-2.1947	0.00015	0.00158822	yes	2.1947
XLOC_013657	XLOC_013657	ZNF544	chr19:58740069-58790172	KO	Rescue	OK	12.1702	15.7796	0.374701	2.19443	0.0001	0.00109908	yes	2.19443
XLOC_022415	XLOC_022415	PPARD	chr6:35310307-35395968	KO	Rescue	OK	8.65866	6.68795	-0.372578	-2.19377	0.00025	0.00247504	yes	2.19377
XLOC_014002	XLOC_014002	HAUS8	chr19:17160570-17186343	KO	Rescue	OK	12.5907	16.4093	0.38215	2.19329	0.0003	0.00290318	yes	2.19329
XLOC_014280	XLOC_014280	ZNF235	chr19:44790399-44809178	KO	Rescue	OK	0.553705	0.851137	0.620275	2.19266	0.0001	0.00109908	yes	2.19266
XLOC_005874	XLOC_005874	FGD4	chr12:32552278-32798984	KO	Rescue	OK	2.01393	2.62128	0.380254	2.19246	0.0001	0.00109908	yes	2.19246
XLOC_004163	XLOC_004163	ZDHHC13	chr11:19138691-19197967	KO	Rescue	OK	7.25741	5.52149	-0.394398	-2.19226	0.0001	0.00109908	yes	2.19226
XLOC_005578	XLOC_005578	-	chr11:119188413-119189468	KO	Rescue	OK	0.976997	0.449243	-1.12086	-2.19118	0.0007	0.00603534	yes	2.19118
XLOC_013726	XLOC_013726	TCF3	chr19:1609288-1652896	KO	Rescue	OK	37.9529	48.0555	0.340489	2.19097	0.00015	0.00158822	yes	2.19097
XLOC_013718	XLOC_013718	-	chr19:1321213-1325366	KO	Rescue	OK	1.00355	1.58385	0.658319	2.19092	0.0001	0.00109908	yes	2.19092
XLOC_000269	XLOC_000269	SFN	chr1:27189632-27190947	KO	Rescue	OK	89.4006	70.5164	-0.342327	-2.19029	0.0001	0.00109908	yes	2.19029
XLOC_004558	XLOC_004558	-	chr11:72281274-72284403	KO	Rescue	OK	0.136055	0.279115	1.03666	2.19	0.00035	0.00330127	yes	2.19
XLOC_019846	XLOC_019846	SORCS2	chr4:7194241-7744564	KO	Rescue	OK	5.54663	4.2526	-0.383265	-2.18846	5e-05	0.000584007	yes	2.18846
XLOC_019619	XLOC_019619	KCNAB1	chr3:155838336-156256927	KO	Rescue	OK	0.618465	0.848348	0.455964	2.18834	5e-05	0.000584007	yes	2.18834
XLOC_012466	XLOC_012466	ZCCHC2	chr18:60189559-60245849	KO	Rescue	OK	5.85757	7.50467	0.357487	2.18824	0.0001	0.00109908	yes	2.18824
XLOC_012035	XLOC_012035	MMD	chr17:53469973-53499360	KO	Rescue	OK	8.59774	6.24045	-0.462306	-2.18739	0.00015	0.00158822	yes	2.18739
XLOC_018038	XLOC_018038	PRAME	chr22:22890122-22901696	KO	Rescue	OK	3.72474	2.7159	-0.45571	-2.18606	0.0001	0.00109908	yes	2.18606
XLOC_023082	XLOC_023082	-	chr6:31822865-31823762	KO	Rescue	OK	0.438813	0.0882934	-2.31323	-2.18589	0.0053	0.031401	yes	2.18589
XLOC_010816	XLOC_010816	ZNF286A	chr17:15602890-15624457	KO	Rescue	OK	5.3061	7.33686	0.467512	2.18568	0.00015	0.00158822	yes	2.18568
XLOC_021819	XLOC_021819	CCDC112	chr5:114602348-114632458	KO	Rescue	OK	4.01648	5.34434	0.412079	2.18515	0.0002	0.00205279	yes	2.18515
XLOC_000259	XLOC_000259	SH3BGRL3	chr1:26606212-26608013	KO	Rescue	OK	34.6002	26.9244	-0.361865	-2.18403	0.0002	0.00205279	yes	2.18403
XLOC_014333	XLOC_014333	-	chr19:47262184-47263722	KO	Rescue	OK	0.257154	0.0646805	-1.99123	-2.18371	0.005	0.0300376	yes	2.18371
XLOC_011514	XLOC_011514	DHX33	chr17:5344231-5372380	KO	Rescue	OK	25.4208	32.1429	0.338494	2.18262	0.0002	0.00205279	yes	2.18262
XLOC_001004	XLOC_001004	PEAR1	chr1:156863522-156886226	KO	Rescue	OK	0.250139	0.139372	-0.843785	-2.18229	0.0005	0.00451536	yes	2.18229
XLOC_023584	XLOC_023584	-	chr6:166310216-166311535	KO	Rescue	OK	0.18592	0.455183	1.29176	2.18171	0.00125	0.00973119	yes	2.18171
XLOC_009893	XLOC_009893	KATNB1	chr16:57769638-57791162	KO	Rescue	OK	13.3793	17.1151	0.355263	2.18169	0.00015	0.00158822	yes	2.18169
XLOC_004937	XLOC_004937	FAM160A2	chr11:6226797-6255941	KO	Rescue	OK	5.21303	6.78631	0.380505	2.18077	0.00025	0.00247504	yes	2.18077
XLOC_005442	XLOC_005442	PICALM	chr11:85668213-85780923	KO	Rescue	OK	46.3479	36.6991	-0.336758	-2.18068	0.00015	0.00158822	yes	2.18068
XLOC_014976	XLOC_014976	LOC728537	chr2:98286205-98319616	KO	Rescue	OK	0.381737	0.175908	-1.11776	-2.17904	5e-05	0.000584007	yes	2.17904
XLOC_002389	XLOC_002389	UBQLN4	chr1:156005091-156023516	KO	Rescue	OK	30.9611	39.1429	0.338295	2.17704	0.0002	0.00205279	yes	2.17704
XLOC_026897	XLOC_026897	TRIQK	chr8:93895757-93978372	KO	Rescue	OK	3.72991	2.80801	-0.409589	-2.17591	0.0003	0.00290318	yes	2.17591
XLOC_019232	XLOC_019232	CDC25A	chr3:48198666-48229939	KO	Rescue	OK	14.6824	18.6576	0.345677	2.17551	5e-05	0.000584007	yes	2.17551
XLOC_006565	XLOC_006565	KIF21A	chr12:39687029-39837216	KO	Rescue	OK	11.3075	14.3143	0.340172	2.17354	0.00015	0.00158822	yes	2.17354
XLOC_009373	XLOC_009373	PTPN9	chr15:75759461-75871625	KO	Rescue	OK	10.6887	13.6076	0.348323	2.17315	0.0001	0.00109908	yes	2.17315
XLOC_007521	XLOC_007521	-	chr13:83491346-83676520	KO	Rescue	OK	5.38846	9.27917	0.784122	2.17313	0.0003	0.00290318	yes	2.17313
XLOC_015584	XLOC_015584	LAPTM4A	chr2:20232410-20251789	KO	Rescue	OK	99.0358	78.4502	-0.336173	-2.17077	0.0002	0.00205279	yes	2.17077
XLOC_016719	XLOC_016719	-	chr20:48788786-48790269	KO	Rescue	OK	0.982997	0.508801	-0.950084	-2.1707	0.00035	0.00330127	yes	2.1707
XLOC_001659	XLOC_001659	CAMK2N1	chr1:20808883-20812728	KO	Rescue	OK	5.57924	4.20261	-0.408784	-2.16963	0.0003	0.00290318	yes	2.16963
XLOC_021521	XLOC_021521	-	chr5:1792271-1796040	KO	Rescue	OK	0.383448	0.223178	-0.780835	-2.16956	0.00045	0.00411481	yes	2.16956
XLOC_011899	XLOC_011899	MPP3	chr17:41878166-41910708	KO	Rescue	OK	5.59929	7.31604	0.38582	2.16943	0.00015	0.00158822	yes	2.16943
XLOC_011025	XLOC_011025	GRB7	chr17:37894161-37903538	KO	Rescue	OK	2.31326	1.62176	-0.512367	-2.16718	5e-05	0.000584007	yes	2.16718
XLOC_017510	XLOC_017510	RUNX1	chr21:36160097-36421595	KO	Rescue	OK	3.91792	2.9543	-0.407269	-2.16668	0.00065	0.0056743	yes	2.16668
XLOC_007300	XLOC_007300	-	chr13:110439310-110442915	KO	Rescue	OK	0.494708	0.301633	-0.713784	-2.16638	0.0003	0.00290318	yes	2.16638
XLOC_027148	XLOC_027148	-	chr9:2844318-2845109	KO	Rescue	OK	0.547328	0.175114	-1.64411	-2.16607	0.00305	0.0200948	yes	2.16607
XLOC_022345	XLOC_022345	TCF19	chr6:31126218-31138451	KO	Rescue	OK	16.6801	13.0874	-0.34995	-2.16566	0.0002	0.00205279	yes	2.16566
XLOC_028799	XLOC_028799	OCRL	chrX:128674190-128726538	KO	Rescue	OK	11.3681	14.4122	0.342296	2.16442	0.00015	0.00158822	yes	2.16442
XLOC_025362	XLOC_025362	CUL1	chr7:148395932-148498202	KO	Rescue	OK	35.351	44.6174	0.335857	2.16403	0.0001	0.00109908	yes	2.16403
XLOC_014527	XLOC_014527	DNAAF3	chr19:55670028-55678090	KO	Rescue	OK	2.88543	3.92171	0.442698	2.16318	5e-05	0.000584007	yes	2.16318
XLOC_020731	XLOC_020731	RNF150	chr4:141780963-142054714	KO	Rescue	OK	3.52743	2.73443	-0.36738	-2.16009	0.00015	0.00158822	yes	2.16009
XLOC_021346	XLOC_021346	TCOF1	chr5:149737155-149779905	KO	Rescue	OK	49.9998	63.015	0.333772	2.15745	0.0001	0.00109908	yes	2.15745
XLOC_005431	XLOC_005431	PRCP	chr11:82535408-82611557	KO	Rescue	OK	31.0101	39.2022	0.338194	2.15571	0.0002	0.00205279	yes	2.15571
XLOC_017426	XLOC_017426	BTG3	chr21:18965967-18985268	KO	Rescue	OK	40.1228	30.9969	-0.372301	-2.15435	0.0002	0.00205279	yes	2.15435
XLOC_018895	XLOC_018895	TIPARP	chr3:156389167-156424557	KO	Rescue	OK	7.21803	9.25342	0.358382	2.15381	0.00015	0.00158822	yes	2.15381
XLOC_027808	XLOC_027808	MOB3B	chr9:27325205-27529850	KO	Rescue	OK	11.0645	14.0098	0.340506	2.15357	0.00015	0.00158822	yes	2.15357
XLOC_018149	XLOC_018149	IL2RB	chr22:37521879-37552404	KO	Rescue	OK	0.404402	0.243904	-0.729477	-2.15259	0.00035	0.00330127	yes	2.15259
XLOC_004192	XLOC_004192	QSER1	chr11:32914791-33001814	KO	Rescue	OK	21.519	27.0982	0.332584	2.15241	0.0002	0.00205279	yes	2.15241
XLOC_027515	XLOC_027515	LHX2	chr9:126773888-126795442	KO	Rescue	OK	2.95082	2.14587	-0.459553	-2.15042	0.00015	0.00158822	yes	2.15042
XLOC_002576	XLOC_002576	ARPC5	chr1:183595327-183605076	KO	Rescue	OK	102.868	81.6944	-0.332485	-2.15037	0.0001	0.00109908	yes	2.15037
XLOC_006060	XLOC_006060	XRCC6BP1	chr12:58335303-58351052	KO	Rescue	OK	6.90088	5.02919	-0.456454	-2.15011	0.00015	0.00158822	yes	2.15011
XLOC_019851	XLOC_019851	HTRA3	chr4:8271488-8308838	KO	Rescue	OK	0.200123	0.444383	1.15092	2.14998	0.0006	0.00527906	yes	2.14998
XLOC_014946	XLOC_014946	RPIA	chr2:88991175-89050452	KO	Rescue	OK	9.73919	12.6131	0.373048	2.14931	0.00015	0.00158822	yes	2.14931
XLOC_019321	XLOC_019321	DCP1A	chr3:53317444-53381654	KO	Rescue	OK	6.40888	8.14632	0.346075	2.14923	0.0002	0.00205279	yes	2.14923
XLOC_026923	XLOC_026923	NIPAL2	chr8:99202060-99306621	KO	Rescue	OK	0.376413	0.188057	-1.00115	-2.14788	0.00035	0.00330127	yes	2.14788
XLOC_011573	XLOC_011573	MYH10	chr17:8377522-8534966	KO	Rescue	OK	18.0235	14.3057	-0.333285	-2.14774	0.0002	0.00205279	yes	2.14774
XLOC_026648	XLOC_026648	FAM86B1,FAM86B2	chr8:12039248-12293852	KO	Rescue	OK	0.817203	1.29946	0.669143	2.14692	0.00025	0.00247504	yes	2.14692
XLOC_023488	XLOC_023488	HIVEP2	chr6:143072603-143267508	KO	Rescue	OK	2.02411	1.55431	-0.381011	-2.14674	5e-05	0.000584007	yes	2.14674
XLOC_020772	XLOC_020772	C4orf46	chr4:159587830-159593202	KO	Rescue	OK	6.30141	8.0956	0.361463	2.14626	0.00015	0.00158822	yes	2.14626
XLOC_011207	XLOC_011207	SCPEP1	chr17:55055467-55084129	KO	Rescue	OK	10.5391	8.11001	-0.377981	-2.14602	0.00025	0.00247504	yes	2.14602
XLOC_013350	XLOC_013350	C5AR1	chr19:47808485-47825404	KO	Rescue	OK	4.74157	3.55327	-0.416218	-2.14575	0.0002	0.00205279	yes	2.14575
XLOC_002575	XLOC_002575	NCF2	chr1:183524696-183560056	KO	Rescue	OK	0.341008	0.140845	-1.27569	-2.14542	0.00045	0.00411481	yes	2.14542
XLOC_026715	XLOC_026715	KIF13B	chr8:28924794-29120637	KO	Rescue	OK	1.4771	1.92988	0.38574	2.14397	0.00015	0.00158822	yes	2.14397
XLOC_017932	XLOC_017932	-	chr22:50293545-50295509	KO	Rescue	OK	0.246689	0.0951225	-1.37483	-2.14248	0.00125	0.00973119	yes	2.14248
XLOC_015265	XLOC_015265	DUSP19	chr2:183943286-183964722	KO	Rescue	OK	0.580881	0.390266	-0.573786	-2.14144	0.0004	0.00371435	yes	2.14144
XLOC_010245	XLOC_010245	NTAN1	chr16:15131709-15149936	KO	Rescue	OK	9.52794	12.5645	0.399122	2.14141	0.00025	0.00247504	yes	2.14141
XLOC_019715	XLOC_019715	BCL6	chr3:187416046-187463513	KO	Rescue	OK	6.85917	5.30337	-0.371124	-2.14139	0.0002	0.00205279	yes	2.14139
XLOC_003582	XLOC_003582	ZNF37BP	chr10:43008960-43048321	KO	Rescue	OK	0.651312	0.888077	0.447335	2.14096	0.0003	0.00290318	yes	2.14096
XLOC_018023	XLOC_018023	YDJC	chr22:21982377-21984362	KO	Rescue	OK	43.9347	55.753	0.343687	2.14061	0.00015	0.00158822	yes	2.14061
XLOC_017196	XLOC_017196	LIPI	chr21:15456312-15579254	KO	Rescue	OK	0.560725	0.19834	-1.49932	-2.14058	0.0021	0.0149779	yes	2.14058
XLOC_025968	XLOC_025968	TRIM24	chr7:138145078-138276399	KO	Rescue	OK	0.495211	1.11564	1.17176	2.14052	0.0003	0.00290318	yes	2.14052
XLOC_018693	XLOC_018693	-	chr3:110918445-110920177	KO	Rescue	OK	0.0533112	0.20772	1.96213	2.14038	0.0035	0.0224163	yes	2.14038
XLOC_003052	XLOC_003052	FAM21A,FAM21B	chr10:51827683-51893269	KO	Rescue	OK	3.85847	2.96317	-0.38089	-2.14026	0.0001	0.00109908	yes	2.14026
XLOC_025627	XLOC_025627	SEC61G	chr7:54819939-54826939	KO	Rescue	OK	90.5356	70.5434	-0.359974	-2.13944	0.0003	0.00290318	yes	2.13944
XLOC_024806	XLOC_024806	GLCCI1	chr7:8008373-8128709	KO	Rescue	OK	10.1258	7.97116	-0.345168	-2.1394	0.0002	0.00205279	yes	2.1394
XLOC_017155	XLOC_017155	-	chr20:61191503-61200449	KO	Rescue	OK	0.896166	0.463948	-0.949803	-2.13938	0.00055	0.00490871	yes	2.13938
XLOC_013735	XLOC_013735	MKNK2	chr19:2037469-2051243	KO	Rescue	OK	60.1438	46.8531	-0.360274	-2.13901	0.0004	0.00371435	yes	2.13901
XLOC_005475	XLOC_005475	MTMR2	chr11:95523624-95657756	KO	Rescue	OK	38.7459	52.5029	0.438355	2.13886	0.0002	0.00205279	yes	2.13886
XLOC_008792	XLOC_008792	TLN2	chr15:62682704-63136829	KO	Rescue	OK	2.57098	3.29876	0.359608	2.13867	0.0001	0.00109908	yes	2.13867
XLOC_012175	XLOC_012175	TRIM65	chr17:73885040-73893084	KO	Rescue	OK	17.5416	22.2054	0.340133	2.13807	0.0004	0.00371435	yes	2.13807
XLOC_001124	XLOC_001124	SUCO	chr1:172502097-172581175	KO	Rescue	OK	8.28607	6.51976	-0.345868	-2.13759	0.0001	0.00109908	yes	2.13759
XLOC_027886	XLOC_027886	-	chr9:35968792-35969420	KO	Rescue	OK	0.712218	0	#NAME?	#NAME?	5e-05	0.000584007	yes	2.13665
XLOC_017754	XLOC_017754	KREMEN1	chr22:29468971-29564321	KO	Rescue	OK	2.01249	1.52192	-0.40309	-2.13634	0.0002	0.00205279	yes	2.13634
XLOC_016167	XLOC_016167	PDE11A	chr2:178487976-178973066	KO	Rescue	OK	0.0692698	0.220936	1.67333	2.13602	0.0001	0.00109908	yes	2.13602
XLOC_023613	XLOC_023613	PHF10	chr6:170102206-170124616	KO	Rescue	OK	74.1161	56.627	-0.388297	-2.13351	0.00025	0.00247504	yes	2.13351
XLOC_027754	XLOC_027754	C9orf123	chr9:7796490-7799836	KO	Rescue	OK	51.3074	39.628	-0.372648	-2.1333	0.00015	0.00158822	yes	2.1333
XLOC_020312	XLOC_020312	CDKN2AIP	chr4:184364838-184370462	KO	Rescue	OK	16.19	20.7681	0.359267	2.13315	0.00025	0.00247504	yes	2.13315
XLOC_015937	XLOC_015937	RNF149	chr2:101892062-101925178	KO	Rescue	OK	13.0647	16.5786	0.343646	2.13184	0.00025	0.00247504	yes	2.13184
XLOC_005094	XLOC_005094	TP53I11	chr11:44785975-44972857	KO	Rescue	OK	2.52014	1.86857	-0.431573	-2.13108	0.0001	0.00109908	yes	2.13108
XLOC_000399	XLOC_000399	PPIH	chr1:43124047-43142429	KO	Rescue	OK	39.6863	50.6906	0.353077	2.13062	0.00025	0.00247504	yes	2.13062
XLOC_015414	XLOC_015414	SPEG	chr2:220299699-220358354	KO	Rescue	OK	3.17087	2.31848	-0.4517	-2.13058	5e-05	0.000584007	yes	2.13058
XLOC_014271	XLOC_014271	PLAUR	chr19:44149807-44179685	KO	Rescue	OK	7.78692	10.2189	0.392108	2.13038	0.00035	0.00330127	yes	2.13038
XLOC_006259	XLOC_006259	OAS1	chr12:113344519-113357712	KO	Rescue	OK	5.30959	3.84592	-0.465272	-2.13002	0.00025	0.00247504	yes	2.13002
XLOC_027163	XLOC_027163	INSL4	chr9:5231406-5234972	KO	Rescue	OK	11.4844	16.0839	0.485949	2.12985	0.00025	0.00247504	yes	2.12985
XLOC_003349	XLOC_003349	ACSL5	chr10:114133915-114188138	KO	Rescue	OK	3.01983	2.25854	-0.419077	-2.12983	0.0001	0.00109908	yes	2.12983
XLOC_022463	XLOC_022463	GLTSCR1L	chr6:42714040-42836296	KO	Rescue	OK	4.73594	6.12534	0.37114	2.12875	0.0001	0.00109908	yes	2.12875
XLOC_018809	XLOC_018809	ACPP	chr3:132036210-132087146	KO	Rescue	OK	0.151646	0.326334	1.10564	2.12837	0.0004	0.00371435	yes	2.12837
XLOC_024839	XLOC_024839	MPP6	chr7:24612924-24733919	KO	Rescue	OK	11.4034	15.3674	0.430416	2.12756	0.00025	0.00247504	yes	2.12756
XLOC_007154	XLOC_007154	DGKH	chr13:42614171-42817023	KO	Rescue	OK	1.3113	1.68663	0.363147	2.12595	0.0003	0.00290318	yes	2.12595
XLOC_026226	XLOC_026226	ZNF703	chr8:37552987-37557540	KO	Rescue	OK	5.22919	3.90436	-0.421503	-2.12523	0.00025	0.00247504	yes	2.12523
XLOC_001976	XLOC_001976	-	chr1:67862837-67865844	KO	Rescue	OK	0.0739751	0.208048	1.4918	2.12491	0.00125	0.00973119	yes	2.12491
XLOC_012373	XLOC_012373	MIB1	chr18:19321544-19450912	KO	Rescue	OK	13.0552	10.3781	-0.331082	-2.1246	0.00025	0.00247504	yes	2.1246
XLOC_017748	XLOC_017748	CCDC117	chr22:29168661-29185283	KO	Rescue	OK	15.4453	19.4818	0.334957	2.12446	0.00025	0.00247504	yes	2.12446
XLOC_005301	XLOC_005301	CTSF	chr11:66330934-66336047	KO	Rescue	OK	8.50377	6.51888	-0.383479	-2.1242	0.00035	0.00330127	yes	2.1242
XLOC_025415	XLOC_025415	UBE3C	chr7:156931654-157062066	KO	Rescue	OK	28.5919	35.903	0.328495	2.12398	0.00015	0.00158822	yes	2.12398
XLOC_021657	XLOC_021657	MOCS2	chr5:52393894-52405598	KO	Rescue	OK	29.4557	23.1464	-0.34776	-2.12366	0.00015	0.00158822	yes	2.12366
XLOC_009340	XLOC_009340	-	chr15:72624448-72627973	KO	Rescue	OK	0.255388	0.131746	-0.954934	-2.12337	0.00065	0.0056743	yes	2.12337
XLOC_017779	XLOC_017779	LIMK2	chr22:31608209-31676066	KO	Rescue	OK	5.32591	4.09723	-0.37838	-2.12117	0.00035	0.00330127	yes	2.12117
XLOC_011374	XLOC_011374	CBX2	chr17:77751810-77762107	KO	Rescue	OK	26.8331	34.1669	0.348586	2.12028	0.00025	0.00247504	yes	2.12028
XLOC_017839	XLOC_017839	CBY1	chr22:39052656-39069861	KO	Rescue	OK	5.24851	7.15182	0.446402	2.11925	0.0002	0.00205279	yes	2.11925
XLOC_019177	XLOC_019177	CSRNP1	chr3:39183341-39196163	KO	Rescue	OK	3.87103	2.92422	-0.404665	-2.11899	0.00015	0.00158822	yes	2.11899
XLOC_004657	XLOC_004657	SRSF8	chr11:94800055-94804388	KO	Rescue	OK	10.9232	13.8034	0.337624	2.11847	0.0002	0.00205279	yes	2.11847
XLOC_020196	XLOC_020196	BBS12	chr4:123653856-123666098	KO	Rescue	OK	0.944264	0.636039	-0.570075	-2.11792	0.0002	0.00205279	yes	2.11792
XLOC_016832	XLOC_016832	-	chr20:295673-299826	KO	Rescue	OK	0.201765	0.342181	0.76208	2.11787	0.0005	0.00451536	yes	2.11787
XLOC_000567	XLOC_000567	-	chr1:77695604-77697128	KO	Rescue	OK	0.224326	0.0690469	-1.69995	-2.11732	0.00345	0.0221214	yes	2.11732
XLOC_015837	XLOC_015837	EVA1A	chr2:75719443-75822992	KO	Rescue	OK	1.03072	0.60279	-0.773928	-2.11683	0.00055	0.00490871	yes	2.11683
XLOC_000010	XLOC_000010	KLHL17	chr1:895966-901099	KO	Rescue	OK	6.37274	8.23511	0.369873	2.11595	0.00035	0.00330127	yes	2.11595
XLOC_006836	XLOC_006836	-	chr12:87921036-87922489	KO	Rescue	OK	0.259215	0.0835218	-1.63393	-2.11353	0.00295	0.0195744	yes	2.11353
XLOC_004237	XLOC_004237	ACCS	chr11:44087728-44105745	KO	Rescue	OK	0.253174	0.106927	-1.2435	-2.11168	0.00085	0.00709504	yes	2.11168
XLOC_021781	XLOC_021781	-	chr5:90603264-90609289	KO	Rescue	OK	0.620395	0.902549	0.540818	2.1115	0.0003	0.00290318	yes	2.1115
XLOC_020205	XLOC_020205	HSPA4L	chr4:128703224-128762008	KO	Rescue	OK	17.8746	23.2172	0.377284	2.11149	0.0002	0.00205279	yes	2.11149
XLOC_015624	XLOC_015624	MPV17	chr2:27532359-27545969	KO	Rescue	OK	21.5877	16.663	-0.373564	-2.11147	0.0003	0.00290318	yes	2.11147
XLOC_000397	XLOC_000397	PPCS	chr1:42922172-42926440	KO	Rescue	OK	23.9152	18.6292	-0.360358	-2.10989	0.00035	0.00330127	yes	2.10989
XLOC_006184	XLOC_006184	DRAM1	chr12:102270975-102317402	KO	Rescue	OK	12.8161	10.109	-0.342312	-2.10951	0.00025	0.00247504	yes	2.10951
XLOC_007426	XLOC_007426	-	chr13:45258647-45289966	KO	Rescue	OK	1.13616	0.380499	-1.5782	-2.10886	0.003	0.0198355	yes	2.10886
XLOC_029456	XLOC_029456	HAUS7	chrX:152713098-152775004	KO	Rescue	OK	11.218	14.6342	0.383531	2.1083	0.00045	0.00411481	yes	2.1083
XLOC_026356	XLOC_026356	ZBTB10	chr8:81396739-81438631	KO	Rescue	OK	7.02798	5.48711	-0.357063	-2.10829	0.00025	0.00247504	yes	2.10829
XLOC_010096	XLOC_010096	POLR3K	chr16:96978-103632	KO	Rescue	OK	90.8833	114.435	0.332438	2.10785	0.00035	0.00330127	yes	2.10785
XLOC_003530	XLOC_003530	DNAJC1	chr10:22045476-22292650	KO	Rescue	OK	20.7498	16.3605	-0.342884	-2.10727	0.0003	0.00290318	yes	2.10727
XLOC_010532	XLOC_010532	PHLPP2	chr16:71678660-71757847	KO	Rescue	OK	4.0437	5.13393	0.344387	2.10636	0.0001	0.00109908	yes	2.10636
XLOC_020197	XLOC_020197	FGF2	chr4:123747862-123844159	KO	Rescue	OK	7.43451	5.78833	-0.36109	-2.1062	0.0004	0.00371435	yes	2.1062
XLOC_014146	XLOC_014146	ZNF850	chr19:37234379-37263716	KO	Rescue	OK	0.32209	0.466637	0.534834	2.10474	0.00015	0.00158822	yes	2.10474
XLOC_019465	XLOC_019465	RABL3	chr3:120405527-120461384	KO	Rescue	OK	5.73626	7.33115	0.353928	2.10467	0.0002	0.00205279	yes	2.10467
XLOC_019382	XLOC_019382	ROBO1	chr3:78646136-79817059	KO	Rescue	OK	23.3146	18.5891	-0.326779	-2.10445	0.00025	0.00247504	yes	2.10445
XLOC_016437	XLOC_016437	SOX12	chr20:300087-335512	KO	Rescue	OK	12.3243	15.5756	0.337782	2.10426	0.00025	0.00247504	yes	2.10426
XLOC_021508	XLOC_021508	-	chr5:860809-861126	KO	Rescue	OK	2.55306	0.941837	-1.43868	-2.10395	0.0022	0.015526	yes	2.10395
XLOC_007115	XLOC_007115	MTUS2	chr13:29598747-30080084	KO	Rescue	OK	0.539491	0.0907502	-2.57162	-2.10298	0.00025	0.00247504	yes	2.10298
XLOC_028103	XLOC_028103	PTPN3	chr9:112137973-112260593	KO	Rescue	OK	3.26185	4.17353	0.355579	2.10247	0.0003	0.00290318	yes	2.10247
XLOC_017632	XLOC_017632	-	chr22:18576250-18585771	KO	Rescue	OK	0.941772	1.24202	0.399239	2.10224	0.0003	0.00290318	yes	2.10224
XLOC_016149	XLOC_016149	CHN1	chr2:175664041-175870207	KO	Rescue	OK	3.48328	4.62054	0.407615	2.10014	0.00015	0.00158822	yes	2.10014
XLOC_012677	XLOC_012677	MEX3C	chr18:48700919-48724051	KO	Rescue	OK	5.06886	6.48343	0.355094	2.09921	0.0002	0.00205279	yes	2.09921
XLOC_012682	XLOC_012682	TCF4	chr18:52889561-53303188	KO	Rescue	OK	0.00773455	0.226479	4.87192	2.09839	5e-05	0.000584007	yes	2.09839
XLOC_001226	XLOC_001226	SHISA4	chr1:201855709-201861715	KO	Rescue	OK	0.803234	0.449018	-0.839046	-2.09708	0.00045	0.00411481	yes	2.09708
XLOC_014141	XLOC_014141	ZFP82	chr19:36881903-36909677	KO	Rescue	OK	0.85097	1.27063	0.578364	2.09681	0.0001	0.00109908	yes	2.09681
XLOC_005734	XLOC_005734	RIMKLB	chr12:8834149-8935689	KO	Rescue	OK	15.8101	19.8828	0.330673	2.09516	0.0005	0.00451536	yes	2.09516
XLOC_026473	XLOC_026473	WDYHV1	chr8:124428897-124454691	KO	Rescue	OK	8.78778	6.61834	-0.409028	-2.09497	0.00035	0.00330127	yes	2.09497
XLOC_028111	XLOC_028111	PTGR1	chr9:114287446-114362135	KO	Rescue	OK	42.4974	33.6123	-0.338383	-2.0937	0.00045	0.00411481	yes	2.0937
XLOC_021618	XLOC_021618	LIFR	chr5:38474937-38608421	KO	Rescue	OK	44.0193	55.3644	0.330821	2.09359	0.0001	0.00109908	yes	2.09359
XLOC_000542	XLOC_000542	GADD45A	chr1:68150859-68154021	KO	Rescue	OK	20.8819	16.3298	-0.354747	-2.09273	0.0007	0.00603534	yes	2.09273
XLOC_010706	XLOC_010706	MED11	chr17:4634722-4643223	KO	Rescue	OK	19.3133	25.7045	0.412426	2.09246	0.00035	0.00330127	yes	2.09246
XLOC_011109	XLOC_011109	RUNDC3A	chr17:42376783-42396038	KO	Rescue	OK	0.444458	0.201104	-1.1441	-2.09219	0.00055	0.00490871	yes	2.09219
XLOC_014132	XLOC_014132	-	chr19:36667576-36669417	KO	Rescue	OK	0.470746	0.23861	-0.980298	-2.09042	0.00075	0.00639082	yes	2.09042
XLOC_014891	XLOC_014891	SEMA4F	chr2:74881354-74910981	KO	Rescue	OK	1.36314	1.0117	-0.43015	-2.08953	0.00025	0.00247504	yes	2.08953
XLOC_015669	XLOC_015669	-	chr2:38337447-38339061	KO	Rescue	OK	0.243931	0.0818125	-1.57608	-2.0889	0.00245	0.0169618	yes	2.0889
XLOC_009012	XLOC_009012	LOC100507217	chr15:93426072-93441977	KO	Rescue	OK	24.5627	31.0432	0.337808	2.0887	0.00055	0.00490871	yes	2.0887
XLOC_017939	XLOC_017939	-	chr22:50414799-50415562	KO	Rescue	OK	0.501902	0.146561	-1.7759	-2.08828	0.00405	0.0252443	yes	2.08828
XLOC_002497	XLOC_002497	CREG1	chr1:167510250-167523056	KO	Rescue	OK	47.071	37.5164	-0.327317	-2.08768	5e-05	0.000584007	yes	2.08768
XLOC_004194	XLOC_004194	TCP11L1	chr11:33060962-33095543	KO	Rescue	OK	9.45644	7.38019	-0.35764	-2.08767	0.0003	0.00290318	yes	2.08767
XLOC_004053	XLOC_004053	RRM1	chr11:4115923-4160106	KO	Rescue	OK	124.184	155.493	0.324373	2.08661	0.0004	0.00371435	yes	2.08661
XLOC_026078	XLOC_026078	ESYT2	chr7:158523644-158622319	KO	Rescue	OK	29.711	37.1205	0.321221	2.08648	0.00025	0.00247504	yes	2.08648
XLOC_020977	XLOC_020977	C5orf51	chr5:41904469-41921738	KO	Rescue	OK	26.1258	32.6793	0.322899	2.08631	0.0003	0.00290318	yes	2.08631
XLOC_018036	XLOC_018036	ZNF280B	chr22:22838771-22863505	KO	Rescue	OK	0.268376	0.412311	0.619481	2.08566	0.00035	0.00330127	yes	2.08566
XLOC_006354	XLOC_006354	EP400	chr12:132434287-132565169	KO	Rescue	OK	9.2005	11.5349	0.326219	2.0845	0.00025	0.00247504	yes	2.0845
XLOC_005070	XLOC_005070	-	chr11:33715478-33717447	KO	Rescue	OK	0.227222	0.0877592	-1.37248	-2.08418	0.00215	0.0152373	yes	2.08418
XLOC_026423	XLOC_026423	-	chr8:101364233-101364864	KO	Rescue	OK	0.871294	0.323328	-1.43016	-2.08249	0.0025	0.017258	yes	2.08249
XLOC_014529	XLOC_014529	PTPRH	chr19:55692614-55720874	KO	Rescue	OK	0.401356	0.242654	-0.725981	-2.08104	0.0005	0.00451536	yes	2.08104
XLOC_018965	XLOC_018965	LOC100505687	chr3:183165395-183173800	KO	Rescue	OK	0.965233	0.563164	-0.777322	-2.08059	0.0005	0.00451536	yes	2.08059
XLOC_028478	XLOC_028478	MID1IP1	chrX:38660684-38665785	KO	Rescue	OK	38.7106	48.8056	0.33432	2.07949	0.0002	0.00205279	yes	2.07949
XLOC_019199	XLOC_019199	KIAA1143	chr3:44790235-44803173	KO	Rescue	OK	7.71752	9.72995	0.334295	2.0793	0.0002	0.00205279	yes	2.0793
XLOC_014057	XLOC_014057	ZNF708	chr19:21470444-21512212	KO	Rescue	OK	0.81676	1.15958	0.505615	2.07871	0.00035	0.00330127	yes	2.07871
XLOC_015503	XLOC_015503	TWIST2	chr2:239756636-239832237	KO	Rescue	OK	5.0539	6.99046	0.467988	2.07836	0.00055	0.00490871	yes	2.07836
XLOC_027768	XLOC_027768	HAUS6	chr9:19053134-19102940	KO	Rescue	OK	15.3106	19.1283	0.321179	2.07773	0.0004	0.00371435	yes	2.07773
XLOC_028059	XLOC_028059	CTSL2	chr9:99791958-99801925	KO	Rescue	OK	2.71264	2.0656	-0.393137	-2.0776	0.0001	0.00109908	yes	2.0776
XLOC_001720	XLOC_001720	SLC9A1	chr1:27425299-27481621	KO	Rescue	OK	5.73847	4.5036	-0.349586	-2.0772	0.00035	0.00330127	yes	2.0772
XLOC_029071	XLOC_029071	ZNF41	chrX:47304265-47345307	KO	Rescue	OK	2.99108	3.95309	0.402317	2.07684	0.00035	0.00330127	yes	2.07684
XLOC_025285	XLOC_025285	-	chr7:134858685-134866702	KO	Rescue	OK	0.175601	0.271598	0.629171	2.0757	0.00055	0.00490871	yes	2.0757
XLOC_018324	XLOC_018324	FANCD2	chr3:10059236-10149915	KO	Rescue	OK	10.4193	13.1301	0.333621	2.07526	0.00025	0.00247504	yes	2.07526
XLOC_010935	XLOC_010935	ATAD5	chr17:29158913-29233851	KO	Rescue	OK	6.28885	8.23029	0.388148	2.07388	0.0005	0.00451536	yes	2.07388
XLOC_025272	XLOC_025272	MEST	chr7:130126015-130371406	KO	Rescue	OK	19.3891	25.2095	0.378723	2.07332	0.00035	0.00330127	yes	2.07332
XLOC_001517	XLOC_001517	ACAP3	chr1:1227755-1243325	KO	Rescue	OK	8.31104	6.52631	-0.348762	-2.07274	0.0003	0.00290318	yes	2.07274
XLOC_027409	XLOC_027409	HABP4	chr9:99212413-99253618	KO	Rescue	OK	4.80738	3.66792	-0.390287	-2.07152	0.0005	0.00451536	yes	2.07152
XLOC_016882	XLOC_016882	C20orf27	chr20:3734145-3749035	KO	Rescue	OK	47.5722	59.7219	0.328142	2.07069	0.00025	0.00247504	yes	2.07069
XLOC_001421	XLOC_001421	GGPS1	chr1:235491752-235507844	KO	Rescue	OK	8.76807	11.1464	0.346253	2.0706	0.00025	0.00247504	yes	2.0706
XLOC_017256	XLOC_017256	EVA1C	chr21:33784016-33887949	KO	Rescue	OK	17.7168	13.9222	-0.347731	-2.07046	0.0004	0.00371435	yes	2.07046
XLOC_003519	XLOC_003519	PTPLA	chr10:17631957-17659373	KO	Rescue	OK	15.6332	19.9953	0.355047	2.06975	0.00025	0.00247504	yes	2.06975
XLOC_006644	XLOC_006644	SLC11A2	chr12:51373543-51422058	KO	Rescue	OK	18.191	22.8781	0.33074	2.06774	0.00045	0.00411481	yes	2.06774
XLOC_022291	XLOC_022291	-	chr6:28143968-28145506	KO	Rescue	OK	0.277179	0.102708	-1.43227	-2.06752	0.00245	0.0169618	yes	2.06752
XLOC_009876	XLOC_009876	SLC12A3	chr16:56898699-56950012	KO	Rescue	OK	17.4761	13.9473	-0.325392	-2.06666	0.0003	0.00290318	yes	2.06666
XLOC_026228	XLOC_026228	PROSC	chr8:37620100-37637286	KO	Rescue	OK	7.52875	9.63901	0.356475	2.06476	0.00015	0.00158822	yes	2.06476
XLOC_009546	XLOC_009546	SSTR5	chr16:1114081-1131454	KO	Rescue	OK	0.144228	0.295435	1.03449	2.06434	0.00105	0.00840853	yes	2.06434
XLOC_020790	XLOC_020790	DDX60	chr4:169137441-169239958	KO	Rescue	OK	2.1142	1.61434	-0.389162	-2.06355	0.00045	0.00411481	yes	2.06355
XLOC_022990	XLOC_022990	-	chr6:27063907-27065536	KO	Rescue	OK	0.23656	0.0753322	-1.65087	-2.06329	0.0037	0.0234022	yes	2.06329
XLOC_016754	XLOC_016754	NPEPL1,STX16,STX16-NPEPL1	chr20:57226114-57290994	KO	Rescue	OK	35.0683	44.5432	0.34504	2.06187	0.0003	0.00290318	yes	2.06187
XLOC_010139	XLOC_010139	HAGH	chr16:1859103-1922179	KO	Rescue	OK	24.6256	17.6076	-0.483957	-2.06117	0.00025	0.00247504	yes	2.06117
XLOC_004623	XLOC_004623	-	chr11:86647776-86648920	KO	Rescue	OK	0.0988477	0.328535	1.73277	2.06035	0.00255	0.0175166	yes	2.06035
XLOC_015288	XLOC_015288	MYO1B	chr2:192109993-192290115	KO	Rescue	OK	27.8058	22.2594	-0.320969	-2.06012	0.0003	0.00290318	yes	2.06012
XLOC_028815	XLOC_028815	HPRT1	chrX:133594174-133634698	KO	Rescue	OK	48.5422	60.7865	0.324513	2.05981	0.00035	0.00330127	yes	2.05981
XLOC_012468	XLOC_012468	PHLPP1	chr18:60382671-60647676	KO	Rescue	OK	3.96013	5.01824	0.341637	2.05976	0.0003	0.00290318	yes	2.05976
XLOC_021741	XLOC_021741	AP3B1	chr5:77298149-77590579	KO	Rescue	OK	31.5213	25.2524	-0.319907	-2.05885	0.0006	0.00527906	yes	2.05885
XLOC_028883	XLOC_028883	VMA21	chrX:150565656-150577836	KO	Rescue	OK	23.485	29.3136	0.319831	2.05823	0.00025	0.00247504	yes	2.05823
XLOC_011015	XLOC_011015	CDK12	chr17:37617664-37725837	KO	Rescue	OK	20.1792	25.2672	0.324398	2.05821	0.00025	0.00247504	yes	2.05821
XLOC_000296	XLOC_000296	EPB41	chr1:29213585-29450421	KO	Rescue	OK	14.4208	18.6049	0.367531	2.05671	0.0004	0.00371435	yes	2.05671
XLOC_010408	XLOC_010408	SHCBP1	chr16:46614467-46655311	KO	Rescue	OK	44.8997	35.9836	-0.319367	-2.05655	0.0004	0.00371435	yes	2.05655
XLOC_005831	XLOC_005831	-	chr12:20842405-20843312	KO	Rescue	OK	0.224022	0.573363	1.35581	2.05611	0.00235	0.0163981	yes	2.05611
XLOC_016277	XLOC_016277	PECR	chr2:216902410-216946547	KO	Rescue	OK	3.29625	2.3998	-0.457912	-2.05552	0.0005	0.00451536	yes	2.05552
XLOC_012733	XLOC_012733	PARD6G	chr18:77905806-78005480	KO	Rescue	OK	1.50676	0.609857	-1.30491	-2.0554	0.0002	0.00205279	yes	2.0554
XLOC_015420	XLOC_015420	SLC4A3	chr2:220492291-220506702	KO	Rescue	OK	0.303066	0.114188	-1.40822	-2.05506	0.00035	0.00330127	yes	2.05506
XLOC_014578	XLOC_014578	ZNF329	chr19:58637634-58666378	KO	Rescue	OK	1.39016	1.8967	0.448239	2.05471	0.00025	0.00247504	yes	2.05471
XLOC_004655	XLOC_004655	KDM4D	chr11:94706844-94732725	KO	Rescue	OK	0.732331	1.07299	0.551065	2.05457	0.00035	0.00330127	yes	2.05457
XLOC_014472	XLOC_014472	ZNF614	chr19:52516576-52531680	KO	Rescue	OK	0.968515	1.3222	0.449092	2.05444	0.0005	0.00451536	yes	2.05444
XLOC_026974	XLOC_026974	EXT1	chr8:118811601-119124058	KO	Rescue	OK	19.1167	15.2445	-0.326544	-2.05419	0.00035	0.00330127	yes	2.05419
XLOC_003983	XLOC_003983	CALY	chr10:135138927-135150475	KO	Rescue	OK	0.62571	0.259709	-1.2686	-2.05413	0.00125	0.00973119	yes	2.05413
XLOC_005678	XLOC_005678	DYRK4	chr12:4699243-4723041	KO	Rescue	OK	0.209375	0.059964	-1.80392	-2.05372	0.0017	0.0125523	yes	2.05372
XLOC_001839	XLOC_001839	CITED4	chr1:41326720-41328150	KO	Rescue	OK	132.067	105.893	-0.318664	-2.05319	0.00025	0.00247504	yes	2.05319
XLOC_026417	XLOC_026417	OSR2	chr8:99956630-99964326	KO	Rescue	OK	5.38782	7.06188	0.390352	2.05283	0.00025	0.00247504	yes	2.05283
XLOC_020001	XLOC_020001	SRD5A3	chr4:56212269-56251747	KO	Rescue	OK	6.34733	4.98873	-0.347478	-2.05214	0.0003	0.00290318	yes	2.05214
XLOC_018085	XLOC_018085	RFPL1-AS1	chr22:29833003-29838444	KO	Rescue	OK	0.127	0.230355	0.859026	2.05064	0.0007	0.00603534	yes	2.05064
XLOC_010649	XLOC_010649	CBFA2T3	chr16:88941262-89043504	KO	Rescue	OK	0.486629	0.311726	-0.642542	-2.04833	0.0004	0.00371435	yes	2.04833
XLOC_018436	XLOC_018436	SLC25A38	chr3:39424814-39438819	KO	Rescue	OK	11.4557	14.5302	0.342988	2.04822	0.00035	0.00330127	yes	2.04822
XLOC_009040	XLOC_009040	-	chr15:101615496-101618454	KO	Rescue	OK	0.573563	0.866002	0.594418	2.04777	0.0005	0.00451536	yes	2.04777
XLOC_017977	XLOC_017977	CECR5	chr22:17618408-17646335	KO	Rescue	OK	31.2495	39.2003	0.32703	2.04733	0.0002	0.00205279	yes	2.04733
XLOC_018128	XLOC_018128	RASD2	chr22:35937351-35983768	KO	Rescue	OK	0.874634	2.21885	1.34306	2.04687	0.00135	0.0104034	yes	2.04687
XLOC_017936	XLOC_017936	-	chr22:50348425-50349848	KO	Rescue	OK	0.277069	0.0957407	-1.53304	-2.04675	0.00285	0.0190314	yes	2.04675
XLOC_000073	XLOC_000073	DFFB	chr1:3773844-3801993	KO	Rescue	OK	2.42774	3.21702	0.40611	2.0465	0.00045	0.00411481	yes	2.0465
XLOC_014817	XLOC_014817	KIAA1841	chr2:61292898-61365169	KO	Rescue	OK	3.62765	4.6828	0.368337	2.04549	0.00035	0.00330127	yes	2.04549
XLOC_000183	XLOC_000183	PADI1	chr1:17531620-17572501	KO	Rescue	OK	0.327564	0.18896	-0.793697	-2.04518	0.0007	0.00603534	yes	2.04518
XLOC_010959	XLOC_010959	-	chr17:30719505-30721597	KO	Rescue	OK	0.304271	0.14127	-1.1069	-2.04445	0.0012	0.00939869	yes	2.04445
XLOC_018939	XLOC_018939	FNDC3B	chr3:171757417-172118492	KO	Rescue	OK	18.7456	15.0385	-0.317886	-2.04375	0.0005	0.00451536	yes	2.04375
XLOC_013747	XLOC_013747	LMNB2	chr19:2428162-2456966	KO	Rescue	OK	49.4584	61.5823	0.316299	2.04352	0.0005	0.00451536	yes	2.04352
XLOC_008143	XLOC_008143	ZNF219	chr14:21538381-21572863	KO	Rescue	OK	9.33832	12.2433	0.390759	2.04203	0.00035	0.00330127	yes	2.04203
XLOC_006955	XLOC_006955	IQCD	chr12:113631259-113658907	KO	Rescue	OK	1.00204	0.494838	-1.01791	-2.04169	0.0003	0.00290318	yes	2.04169
XLOC_018966	XLOC_018966	KLHL24	chr3:183353395-183402305	KO	Rescue	OK	1.79514	1.3779	-0.381631	-2.04122	0.00025	0.00247504	yes	2.04122
XLOC_018641	XLOC_018641	ARL13B	chr3:93698974-93774522	KO	Rescue	OK	4.70631	6.00796	0.352279	2.04063	0.00055	0.00490871	yes	2.04063
XLOC_005622	XLOC_005622	CDON	chr11:125821490-125933187	KO	Rescue	OK	2.71556	2.10137	-0.369922	-2.04055	0.0005	0.00451536	yes	2.04055
XLOC_021961	XLOC_021961	-	chr5:147247060-147248005	KO	Rescue	OK	0.572661	0.232735	-1.29899	-2.03981	0.002	0.0143871	yes	2.03981
XLOC_011840	XLOC_011840	KRT19	chr17:39679868-39684641	KO	Rescue	OK	0.323763	0.121313	-1.41621	-2.03959	0.0019	0.0137801	yes	2.03959
XLOC_026987	XLOC_026987	FBXO32	chr8:124510126-124553949	KO	Rescue	OK	1.53772	0.906009	-0.763197	-2.03955	0.00045	0.00411481	yes	2.03955
XLOC_026179	XLOC_026179	-	chr8:23336713-23349781	KO	Rescue	OK	0.276127	0.157549	-0.809527	-2.03892	0.00115	0.00907493	yes	2.03892
XLOC_028537	XLOC_028537	CCDC22	chrX:49091926-49121288	KO	Rescue	OK	6.27534	8.09371	0.367107	2.03839	0.0004	0.00371435	yes	2.03839
XLOC_007130	XLOC_007130	RFC3	chr13:34392115-34540695	KO	Rescue	OK	34.7498	44.0118	0.340886	2.03789	0.00025	0.00247504	yes	2.03789
XLOC_010742	XLOC_010742	-	chr17:6936274-6937802	KO	Rescue	OK	0.0861959	0.252573	1.55101	2.03783	0.00315	0.0205356	yes	2.03783
XLOC_025885	XLOC_025885	C7orf60	chr7:112459201-112579932	KO	Rescue	OK	1.18368	0.846871	-0.483061	-2.03713	0.00055	0.00490871	yes	2.03713
XLOC_003105	XLOC_003105	SUPV3L1	chr10:70939992-70968849	KO	Rescue	OK	26.7927	33.4602	0.320604	2.03636	0.0003	0.00290318	yes	2.03636
XLOC_004482	XLOC_004482	BANF1	chr11:65764015-65771617	KO	Rescue	OK	198.786	252.922	0.347481	2.035	0.00025	0.00247504	yes	2.035
XLOC_001293	XLOC_001293	CAMK1G	chr1:209757044-209787284	KO	Rescue	OK	0.32816	0.167895	-0.966842	-2.03427	0.0009	0.00744933	yes	2.03427
XLOC_025367	XLOC_025367	ZNF212	chr7:148936741-148952700	KO	Rescue	OK	4.03284	5.23597	0.376661	2.03318	0.00035	0.00330127	yes	2.03318
XLOC_000326	XLOC_000326	ZBTB8A	chr1:33004759-33072008	KO	Rescue	OK	3.24968	4.11594	0.340928	2.0326	0.00035	0.00330127	yes	2.0326
XLOC_000593	XLOC_000593	SAMD13	chr1:84764048-84816481	KO	Rescue	OK	0.113952	0.310454	1.44595	2.0325	0.00085	0.00709504	yes	2.0325
XLOC_006964	XLOC_006964	TBX3	chr12:115108058-115121969	KO	Rescue	OK	13.3965	16.7216	0.319852	2.03099	0.0003	0.00290318	yes	2.03099
XLOC_001240	XLOC_001240	BTG2	chr1:203274663-203278729	KO	Rescue	OK	11.4458	9.01888	-0.343794	-2.03092	0.0004	0.00371435	yes	2.03092
XLOC_027426	XLOC_027426	-	chr9:101919833-101921545	KO	Rescue	OK	0.612085	0.336384	-0.863623	-2.03027	0.0011	0.00875456	yes	2.03027
XLOC_021373	XLOC_021373	THG1L	chr5:157158322-157168639	KO	Rescue	OK	9.95134	13.0956	0.396118	2.0296	0.00035	0.00330127	yes	2.0296
XLOC_015532	XLOC_015532	-	chr2:243006032-243007447	KO	Rescue	OK	0.218186	0.0347944	-2.64863	-2.02775	0.00765	0.0416845	yes	2.02775
XLOC_018692	XLOC_018692	-	chr3:110915855-110917463	KO	Rescue	OK	0.0145855	0.216069	3.88889	2.02758	0.0026	0.0177727	yes	2.02758
XLOC_007012	XLOC_007012	B3GNT4	chr12:122652265-122692147	KO	Rescue	OK	0.223124	0.0648639	-1.78236	-2.02757	0.00275	0.0185037	yes	2.02757
XLOC_023465	XLOC_023465	MTFR2	chr6:136552167-136571449	KO	Rescue	OK	5.81085	7.65101	0.396901	2.02744	0.0004	0.00371435	yes	2.02744
XLOC_018185	XLOC_018185	PDGFB	chr22:39619684-39643884	KO	Rescue	OK	6.97317	5.35898	-0.379856	-2.02738	0.00045	0.00411481	yes	2.02738
XLOC_013472	XLOC_013472	ZNF613	chr19:52430687-52449679	KO	Rescue	OK	0.24778	0.448772	0.856926	2.02737	0.0007	0.00603534	yes	2.02737
XLOC_010644	XLOC_010644	PIEZO1	chr16:88772890-88851626	KO	Rescue	OK	85.2458	106.779	0.324926	2.0262	0.00055	0.00490871	yes	2.0262
XLOC_029406	XLOC_029406	LDOC1	chrX:140269930-140271310	KO	Rescue	OK	7.86235	5.96138	-0.399314	-2.02617	0.0005	0.00451536	yes	2.02617
XLOC_003341	XLOC_003341	MXI1	chr10:111967362-112047123	KO	Rescue	OK	6.95092	8.8121	0.342283	2.02613	0.00035	0.00330127	yes	2.02613
XLOC_021353	XLOC_021353	GM2A	chr5:150632612-150649953	KO	Rescue	OK	8.03317	6.35051	-0.339095	-2.02567	0.00045	0.00411481	yes	2.02567
XLOC_001307	XLOC_001307	-	chr1:211752993-211755568	KO	Rescue	OK	0.365786	0.59759	0.708156	2.02567	0.00095	0.00774839	yes	2.02567
XLOC_022937	XLOC_022937	LOC100130357,TBC1D7	chr6:12717036-13328792	KO	Rescue	OK	17.2069	13.2134	-0.380991	-2.02448	0.00025	0.00247504	yes	2.02448
XLOC_019471	XLOC_019471	CCDC58	chr3:122078435-122102074	KO	Rescue	OK	50.3527	63.4381	0.333282	2.02422	0.0006	0.00527906	yes	2.02422
XLOC_028718	XLOC_028718	RAB40A	chrX:102659724-102774417	KO	Rescue	OK	0.727689	1.14028	0.647988	2.0231	0.00035	0.00330127	yes	2.0231
XLOC_014624	XLOC_014624	ID2	chr2:8822112-8824583	KO	Rescue	OK	2.11258	1.41999	-0.573129	-2.02181	0.00095	0.00774839	yes	2.02181
XLOC_005203	XLOC_005203	FADS1	chr11:61567096-61634825	KO	Rescue	OK	47.8425	61.3254	0.358192	2.02033	0.00045	0.00411481	yes	2.02033
XLOC_026966	XLOC_026966	NUDCD1	chr8:110250645-110346370	KO	Rescue	OK	21.9715	27.7708	0.33793	2.01983	0.0004	0.00371435	yes	2.01983
XLOC_005916	XLOC_005916	PRPH	chr12:49688908-49692481	KO	Rescue	OK	0.303797	0.131981	-1.20278	-2.01966	0.00195	0.0141061	yes	2.01966
XLOC_000467	XLOC_000467	FOXD2	chr1:47897692-47906363	KO	Rescue	OK	0.493134	0.305861	-0.689102	-2.01964	0.0006	0.00527906	yes	2.01964
XLOC_016388	XLOC_016388	RAB17	chr2:238482964-238500292	KO	Rescue	OK	9.7272	7.52807	-0.369745	-2.01892	0.00035	0.00330127	yes	2.01892
XLOC_003289	XLOC_003289	-	chr10:102326136-102329284	KO	Rescue	OK	0.208514	0.100431	-1.05394	-2.01856	0.00185	0.0134993	yes	2.01856
XLOC_004265	XLOC_004265	PTPMT1	chr11:47586668-47606115	KO	Rescue	OK	28.8356	41.9545	0.540971	2.01807	0.00035	0.00330127	yes	2.01807
XLOC_003942	XLOC_003942	OAT	chr10:126085871-126107545	KO	Rescue	OK	25.5312	20.3792	-0.325165	-2.01802	0.0005	0.00451536	yes	2.01802
XLOC_019190	XLOC_019190	HIGD1A	chr3:42824399-42846027	KO	Rescue	OK	43.9607	35.392	-0.312792	-2.01801	0.0002	0.00205279	yes	2.01801
XLOC_024891	XLOC_024891	ANLN	chr7:36363758-36493400	KO	Rescue	OK	53.4728	42.6917	-0.324848	-2.0177	0.0006	0.00527906	yes	2.0177
XLOC_009799	XLOC_009799	ORAI3	chr16:30960401-30967733	KO	Rescue	OK	1.38474	0.850324	-0.703531	-2.01718	0.00035	0.00330127	yes	2.01718
XLOC_029166	XLOC_029166	OPHN1	chrX:67262185-67653688	KO	Rescue	OK	3.04628	2.39535	-0.346811	-2.01498	0.00055	0.00490871	yes	2.01498
XLOC_011337	XLOC_011337	SPHK1	chr17:74380412-74383941	KO	Rescue	OK	16.9839	21.3757	0.331805	2.01458	0.0004	0.00371435	yes	2.01458
XLOC_011657	XLOC_011657	-	chr17:21095657-21096752	KO	Rescue	OK	0.149395	0.398603	1.41583	2.01436	0.0026	0.0177727	yes	2.01436
XLOC_008778	XLOC_008778	LOC283663	chr15:57592562-57599967	KO	Rescue	OK	0.130077	0.255574	0.974375	2.01385	0.0007	0.00603534	yes	2.01385
XLOC_007621	XLOC_007621	LOC101101776	chr14:19668001-19681016	KO	Rescue	OK	0.174375	0.323704	0.892485	2.01302	0.00145	0.011002	yes	2.01302
XLOC_013061	XLOC_013061	CILP2	chr19:19649073-19657468	KO	Rescue	OK	0.226171	0.367368	0.699815	2.01171	0.00085	0.00709504	yes	2.01171
XLOC_025711	XLOC_025711	GATSL2	chr7:74807604-74867341	KO	Rescue	OK	0.559105	0.233236	-1.26133	-2.01113	0.0023	0.0160894	yes	2.01113
XLOC_022063	XLOC_022063	NOP16	chr5:175810939-175815763	KO	Rescue	OK	65.4076	81.6896	0.320695	2.01086	0.00035	0.00330127	yes	2.01086
XLOC_004774	XLOC_004774	UBASH3B	chr11:122526397-122685187	KO	Rescue	OK	7.06723	5.64679	-0.323713	-2.01069	0.00025	0.00247504	yes	2.01069
XLOC_010456	XLOC_010456	CNGB1	chr16:57915545-58005020	KO	Rescue	OK	1.00624	0.737331	-0.448593	-2.00943	0.0002	0.00205279	yes	2.00943
XLOC_026466	XLOC_026466	DEPTOR	chr8:120885899-121067818	KO	Rescue	OK	2.53706	1.85346	-0.45294	-2.0079	0.0005	0.00451536	yes	2.0079
XLOC_016815	XLOC_016815	LIME1,SLC2A4RG,ZGPAT	chr20:62289162-62462659	KO	Rescue	OK	47.2118	62.5969	0.406943	2.00787	0.0006	0.00527906	yes	2.00787
XLOC_021748	XLOC_021748	HOMER1	chr5:78669013-78810504	KO	Rescue	OK	7.72383	9.71748	0.331265	2.00779	0.0004	0.00371435	yes	2.00779
XLOC_005797	XLOC_005797	ATF7IP	chr12:14518588-14655948	KO	Rescue	OK	6.65896	8.46214	0.345725	2.00637	0.0004	0.00371435	yes	2.00637
XLOC_028519	XLOC_028519	FTSJ1	chrX:48334418-48344752	KO	Rescue	OK	33.6205	41.8302	0.315203	2.00563	0.00045	0.00411481	yes	2.00563
XLOC_015516	XLOC_015516	ANO7	chr2:242127923-242165613	KO	Rescue	OK	0.174967	0.330257	0.916504	2.00475	0.0011	0.00875456	yes	2.00475
XLOC_017686	XLOC_017686	PPIL2	chr22:22020272-22090071	KO	Rescue	OK	12.9751	16.3585	0.334294	2.00374	0.00065	0.0056743	yes	2.00374
XLOC_009374	XLOC_009374	-	chr15:75877780-75884795	KO	Rescue	OK	0.497801	0.687258	0.465283	2.00362	0.00085	0.00709504	yes	2.00362
XLOC_018768	XLOC_018768	ABTB1	chr3:127391780-127399834	KO	Rescue	OK	1.45662	0.992239	-0.553862	-2.00336	0.00075	0.00639082	yes	2.00336
XLOC_025316	XLOC_025316	SSBP1	chr7:141438120-141487541	KO	Rescue	OK	165.824	205.942	0.312584	2.00277	0.00025	0.00247504	yes	2.00277
XLOC_004182	XLOC_004182	-	chr11:28904740-28907031	KO	Rescue	OK	0.136504	0.286674	1.07046	2.0025	0.0016	0.0119348	yes	2.0025
XLOC_008217	XLOC_008217	ARHGAP5-AS1	chr14:32544624-32545905	KO	Rescue	OK	1.28951	0.795379	-0.69711	-2.00182	0.00075	0.00639082	yes	2.00182
XLOC_008323	XLOC_008323	SIX1	chr14:61111416-61116155	KO	Rescue	OK	2.68449	3.54162	0.399758	2.00089	0.00085	0.00709504	yes	2.00089
XLOC_002545	XLOC_002545	KIAA0040	chr1:175126119-175162229	KO	Rescue	OK	4.887	3.84069	-0.347585	-2	0.00065	0.0056743	yes	2
XLOC_014637	XLOC_014637	HPCAL1	chr2:10443029-10567743	KO	Rescue	OK	51.8998	41.741	-0.314262	-1.99916	0.00045	0.00411481	yes	1.99916
XLOC_007284	XLOC_007284	ITGBL1	chr13:102104899-103054124	KO	Rescue	OK	1.23313	0.822345	-0.584507	-1.99907	0.00095	0.00774839	yes	1.99907
XLOC_021274	XLOC_021274	CYSTM1	chr5:139554652-139623374	KO	Rescue	OK	71.5519	57.3282	-0.319746	-1.99897	0.00055	0.00490871	yes	1.99897
XLOC_012515	XLOC_012515	YES1	chr18:721591-812327	KO	Rescue	OK	36.3887	45.0697	0.308667	1.99711	0.00045	0.00411481	yes	1.99711
XLOC_003938	XLOC_003938	IKZF5	chr10:124750321-124768366	KO	Rescue	OK	3.41972	4.35798	0.34978	1.99696	0.00045	0.00411481	yes	1.99696
XLOC_001068	XLOC_001068	UHMK1	chr1:162466963-162499510	KO	Rescue	OK	30.7195	24.8052	-0.308514	-1.99667	0.00045	0.00411481	yes	1.99667
XLOC_007024	XLOC_007024	MPHOSPH9	chr12:123636873-123717724	KO	Rescue	OK	11.783	14.9898	0.347278	1.9954	0.00025	0.00247504	yes	1.9954
XLOC_000556	XLOC_000556	ACADM	chr1:76190042-76229355	KO	Rescue	OK	67.1251	54.2326	-0.307692	-1.99532	0.0007	0.00603534	yes	1.99532
XLOC_020308	XLOC_020308	TENM3	chr4:183060158-183724177	KO	Rescue	OK	5.91232	4.69205	-0.333507	-1.9952	0.00035	0.00330127	yes	1.9952
XLOC_005048	XLOC_005048	-	chr11:27312422-27316122	KO	Rescue	OK	0.297816	0.469255	0.655951	1.99363	0.0005	0.00451536	yes	1.99363
XLOC_012889	XLOC_012889	ANGPTL4	chr19:8429010-8439257	KO	Rescue	OK	0.734513	1.1283	0.619287	1.99301	0.00085	0.00709504	yes	1.99301
XLOC_024865	XLOC_024865	C7orf41	chr7:30174551-30202381	KO	Rescue	OK	0.898204	0.655821	-0.45374	-1.99296	0.00035	0.00330127	yes	1.99296
XLOC_019466	XLOC_019466	POLQ	chr3:121150215-121264853	KO	Rescue	OK	4.17535	5.26559	0.334696	1.99226	0.0003	0.00290318	yes	1.99226
XLOC_025773	XLOC_025773	PON2	chr7:95034173-95064384	KO	Rescue	OK	85.3869	105.719	0.308143	1.9918	0.0006	0.00527906	yes	1.9918
XLOC_026215	XLOC_026215	UBXN8	chr8:30601279-30624587	KO	Rescue	OK	18.9794	23.9077	0.333037	1.99162	0.00035	0.00330127	yes	1.99162
XLOC_017539	XLOC_017539	RIPK4	chr21:43159528-43187249	KO	Rescue	OK	0.559496	0.368172	-0.603745	-1.9913	0.001	0.00809319	yes	1.9913
XLOC_005965	XLOC_005965	-	chr12:52650261-52651716	KO	Rescue	OK	0.263495	0.0944013	-1.48089	-1.99124	0.00315	0.0205356	yes	1.99124
XLOC_026396	XLOC_026396	-	chr8:95961824-95962583	KO	Rescue	OK	1.02652	0.491942	-1.0612	-1.99119	0.0014	0.0107001	yes	1.99119
XLOC_025896	XLOC_025896	TSPAN12	chr7:120427373-120498399	KO	Rescue	OK	8.94104	12.8855	0.527234	1.98911	0.0003	0.00290318	yes	1.98911
XLOC_021554	XLOC_021554	DNAH5	chr5:13690436-14012029	KO	Rescue	OK	0.226272	0.159348	-0.505876	-1.98855	0.0009	0.00744933	yes	1.98855
XLOC_014858	XLOC_014858	NAGK	chr2:71295407-71305998	KO	Rescue	OK	6.94746	5.34469	-0.378381	-1.98816	0.0008	0.00674826	yes	1.98816
XLOC_027380	XLOC_027380	FGD3	chr9:95709600-95798518	KO	Rescue	OK	0.344121	0.541051	0.652847	1.98815	0.00115	0.00907493	yes	1.98815
XLOC_011307	XLOC_011307	MIR3615,SLC9A3R1	chr17:72744750-72765499	KO	Rescue	OK	97.3459	78.5978	-0.308631	-1.98731	0.0007	0.00603534	yes	1.98731
XLOC_017565	XLOC_017565	-	chr21:44574985-44575942	KO	Rescue	OK	0.369246	0.025452	-3.85873	-1.98642	0.00265	0.0180043	yes	1.98642
XLOC_019052	XLOC_019052	FYTTD1	chr3:197398238-197511317	KO	Rescue	OK	33.2902	26.2666	-0.341869	-1.98564	0.00085	0.00709504	yes	1.98564
XLOC_009150	XLOC_009150	RPAP1	chr15:41809374-41836464	KO	Rescue	OK	10.1535	12.6444	0.316518	1.98528	0.0006	0.00527906	yes	1.98528
XLOC_010519	XLOC_010519	LOC100506060	chr16:70253483-70260813	KO	Rescue	OK	1.54751	1.01881	-0.60306	-1.98481	0.00095	0.00774839	yes	1.98481
XLOC_010328	XLOC_010328	CLN3	chr16:28488599-28503623	KO	Rescue	OK	21.6495	17.2762	-0.325547	-1.98448	0.00045	0.00411481	yes	1.98448
XLOC_001416	XLOC_001416	SLC35F3	chr1:234040246-234460317	KO	Rescue	OK	4.66113	3.27273	-0.510186	-1.98447	0.0007	0.00603534	yes	1.98447
XLOC_021128	XLOC_021128	TMEM161B-AS1	chr5:87564698-87732569	KO	Rescue	OK	3.11366	1.95668	-0.670204	-1.98379	0.0007	0.00603534	yes	1.98379
XLOC_020064	XLOC_020064	-	chr4:75185216-75186575	KO	Rescue	OK	0.215466	0.05175	-2.05783	-1.98335	0.00645	0.0366345	yes	1.98335
XLOC_022196	XLOC_022196	-	chr6:12314687-12335013	KO	Rescue	OK	0.993169	0.161636	-2.61929	-1.98234	0.00765	0.0416845	yes	1.98234
XLOC_017541	XLOC_017541	C2CD2	chr21:43305218-43373999	KO	Rescue	OK	5.61451	7.02643	0.323632	1.98201	0.00065	0.0056743	yes	1.98201
XLOC_025973	XLOC_025973	ZC3HAV1L	chr7:138706241-138721017	KO	Rescue	OK	6.83015	8.50999	0.317239	1.9806	0.0006	0.00527906	yes	1.9806
XLOC_002182	XLOC_002182	-	chr1:119558890-119565185	KO	Rescue	OK	0.488096	0.680258	0.478917	1.98033	0.0005	0.00451536	yes	1.98033
XLOC_000420	XLOC_000420	ST3GAL3	chr1:44173203-44397105	KO	Rescue	OK	3.52367	2.6299	-0.42207	-1.97894	0.00045	0.00411481	yes	1.97894
XLOC_006447	XLOC_006447	DDX12P	chr12:9549657-9600768	KO	Rescue	OK	4.17349	5.70387	0.450686	1.97893	0.0006	0.00527906	yes	1.97893
XLOC_027057	XLOC_027057	TRAPPC9	chr8:140740164-141468678	KO	Rescue	OK	9.08624	7.2311	-0.329469	-1.97881	0.00025	0.00247504	yes	1.97881
XLOC_014136	XLOC_014136	-	chr19:36755259-36757604	KO	Rescue	OK	3.19714	4.19791	0.392892	1.97866	0.0006	0.00527906	yes	1.97866
XLOC_007617	XLOC_007617	RASA3	chr13:114747190-114898095	KO	Rescue	OK	13.5787	16.9582	0.320631	1.97836	0.0005	0.00451536	yes	1.97836
XLOC_009923	XLOC_009923	LRRC36	chr16:67360746-67419109	KO	Rescue	OK	12.6704	9.92948	-0.351672	-1.9778	0.00045	0.00411481	yes	1.9778
XLOC_013059	XLOC_013059	GATAD2A	chr19:19496490-19619741	KO	Rescue	OK	31.5196	39.0253	0.30816	1.9775	0.00045	0.00411481	yes	1.9775
XLOC_015179	XLOC_015179	-	chr2:162101248-162106112	KO	Rescue	OK	1.53442	1.10466	-0.474094	-1.97631	0.00065	0.0056743	yes	1.97631
XLOC_027729	XLOC_027729	KIAA0020	chr9:2777329-2844286	KO	Rescue	OK	33.9084	42.6082	0.329488	1.97568	0.00065	0.0056743	yes	1.97568
XLOC_028201	XLOC_028201	AK1	chr9:130628758-130640022	KO	Rescue	OK	28.0349	22.543	-0.314548	-1.97522	0.00075	0.00639082	yes	1.97522
XLOC_012910	XLOC_012910	MRPL4	chr19:10362639-10370736	KO	Rescue	OK	69.6298	86.6455	0.31542	1.97493	0.0004	0.00371435	yes	1.97493
XLOC_017342	XLOC_017342	-	chr21:45235314-45236690	KO	Rescue	OK	0.25742	0.0888631	-1.53447	-1.97344	0.00385	0.0241504	yes	1.97344
XLOC_007897	XLOC_007897	SPATA7	chr14:88851987-88904804	KO	Rescue	OK	1.03774	0.670282	-0.630603	-1.97339	0.00085	0.00709504	yes	1.97339
XLOC_026110	XLOC_026110	CLDN23	chr8:8559665-8561617	KO	Rescue	OK	1.0176	0.659489	-0.625744	-1.97339	0.00095	0.00774839	yes	1.97339
XLOC_015469	XLOC_015469	EFHD1	chr2:233470766-233547491	KO	Rescue	OK	0.486099	0.798627	0.716274	1.97287	0.0013	0.010083	yes	1.97287
XLOC_016188	XLOC_016188	TFPI	chr2:188328957-188419510	KO	Rescue	OK	30.6104	23.4321	-0.385539	-1.97234	0.0004	0.00371435	yes	1.97234
XLOC_011299	XLOC_011299	TTYH2	chr17:72209695-72258157	KO	Rescue	OK	0.404158	0.246724	-0.71202	-1.9722	0.0008	0.00674826	yes	1.9722
[truncated: 1,214 more rows]
