# Supplementary material for: Pleiotropic requirements for human TDP-43 in the regulation of cell and organelle homeostasis
Source: Life Sci Alliance. 2019 Sep 16;2(5):e201900358. doi: 10.26508/lsa.201900358 (PMC6749094; doi:10.26508/lsa.201900358)
Supplement: Supplementary file 2 [file LSA-2019-00358_TableS2.xlsx]

## Sheet: isoform_exp_changes.xls
test_id	gene_id	gene	locus	sample_1	sample_2	status	KO Expression	Rescue Expression	log2(fold_change)	test_stat	p_value	q_value	significant	abs_test_stat
TCONS_00054797	XLOC_021993	SPARC	chr5:151040656-151066615	KO	Rescue	OK	22.2542	2.46556	-3.17409	-17.862	5e-05	0.00179837	yes	17.862
TCONS_00068765	XLOC_028104	C9orf152	chr9:112961845-112970413	KO	Rescue	OK	6.84475	0.52432	-3.70648	-14.1035	5e-05	0.00179837	yes	14.1035
TCONS_00032515	XLOC_012980	PKN1	chr19:14544136-14582679	KO	Rescue	OK	4.10082	29.0486	2.82448	13.6214	5e-05	0.00179837	yes	13.6214
TCONS_00006568	XLOC_002642	FMOD	chr1:203309726-203320289	KO	Rescue	OK	8.0382	0.343766	-4.54737	-12.817	5e-05	0.00179837	yes	12.817
TCONS_00036576	XLOC_014657	-	chr2:20291269-20296072	KO	Rescue	OK	3.12589	0.35362	-3.14399	-12.6146	5e-05	0.00179837	yes	12.6146
TCONS_00067610	XLOC_027566	NUP188	chr9:131707806-131769676	KO	Rescue	OK	2.41518	73.1479	4.92062	12.3973	5e-05	0.00179837	yes	12.3973
TCONS_00055727	XLOC_022374	CFB	chr6:31913720-31919861	KO	Rescue	OK	6.41807	0.870634	-2.882	-12.3373	5e-05	0.00179837	yes	12.3373
TCONS_00034585	XLOC_013828	C3	chr19:6677845-6720662	KO	Rescue	OK	6.41348	1.52163	-2.07549	-11.3153	5e-05	0.00179837	yes	11.3153
TCONS_00043956	XLOC_017653	RANBP1	chr22:20105023-20114704	KO	Rescue	OK	128.065	411.788	1.68502	10.8355	5e-05	0.00179837	yes	10.8355
TCONS_00029201	XLOC_011671	VTN	chr17:26694298-26697373	KO	Rescue	OK	37.1382	10.7162	-1.79311	-10.6574	5e-05	0.00179837	yes	10.6574
TCONS_00033541	XLOC_013358	EHD2	chr19:48216600-48246391	KO	Rescue	OK	12.7123	39.5713	1.63823	10.0079	5e-05	0.00179837	yes	10.0079
TCONS_00063301	XLOC_025748	ABCB1	chr7:87132342-87461613	KO	Rescue	OK	8.08215	2.01087	-2.00692	-9.98535	5e-05	0.00179837	yes	9.98535
TCONS_00024578	XLOC_009857	GNAO1	chr16:56225250-56391356	KO	Rescue	OK	1.32551	0.141548	-3.22718	-9.84835	5e-05	0.00179837	yes	9.84835
TCONS_00062447	XLOC_025388	ABP1	chr7:150549564-150558379	KO	Rescue	OK	11.2828	2.81226	-2.00433	-9.82799	5e-05	0.00179837	yes	9.82799
TCONS_00031222	XLOC_012469	SERPINB5	chr18:61144143-61172318	KO	Rescue	OK	4.11942	13.626	1.72585	9.75788	5e-05	0.00179837	yes	9.75788
TCONS_00012260	XLOC_004861	CHID1	chr11:867443-915058	KO	Rescue	OK	0.958119	15.7958	4.04319	9.35893	5e-05	0.00179837	yes	9.35893
TCONS_00049619	XLOC_019840	S100P	chr4:6695565-6698897	KO	Rescue	OK	151.151	51.9229	-1.54154	-9.22318	5e-05	0.00179837	yes	9.22318
TCONS_00071224	XLOC_029073	ELK1	chrX:47491064-47510247	KO	Rescue	OK	14.1238	0.696251	-4.34237	-9.01208	5e-05	0.00179837	yes	9.01208
TCONS_00019774	XLOC_007882	TMEM63C	chr14:77648101-77725838	KO	Rescue	OK	0.984784	0.0909598	-3.43651	-8.91705	5e-05	0.00179837	yes	8.91705
TCONS_00069644	XLOC_028436	SAT1	chrX:23801274-23804327	KO	Rescue	OK	21.1875	4.61638	-2.19838	-8.84595	5e-05	0.00179837	yes	8.84595
TCONS_00061099	XLOC_024830	GPNMB	chr7:23286288-23314729	KO	Rescue	OK	5.03412	0.798012	-2.65726	-8.78522	5e-05	0.00179837	yes	8.78522
TCONS_00008635	XLOC_003459	ADARB2	chr10:1223247-1779868	KO	Rescue	OK	0.795584	4.19918	2.40002	8.49492	5e-05	0.00179837	yes	8.49492
TCONS_00069664	XLOC_028446	PDK3	chrX:24483343-24568583	KO	Rescue	OK	4.69697	1.65399	-1.50578	-8.36398	5e-05	0.00179837	yes	8.36398
TCONS_00021105	XLOC_008458	CLMN	chr14:95648275-95786245	KO	Rescue	OK	1.00838	0.180046	-2.4856	-8.29329	5e-05	0.00179837	yes	8.29329
TCONS_00055894	XLOC_022431	CDKN1A	chr6:36644236-36655116	KO	Rescue	OK	17.1467	5.43296	-1.65812	-8.25138	5e-05	0.00179837	yes	8.25138
TCONS_00000058	XLOC_000017	AGRN	chr1:955436-991499	KO	Rescue	OK	9.4001	33.4807	1.83258	8.24817	5e-05	0.00179837	yes	8.24817
TCONS_00036481	XLOC_014613	TRAPPC12	chr2:3383445-3483342	KO	Rescue	OK	0.851849	6.08284	2.83607	8.23686	5e-05	0.00179837	yes	8.23686
TCONS_00033618	XLOC_013402	SNAR-G1	chr19:49540276-49540404	KO	Rescue	OK	2.71641	0	#NAME?	#NAME?	0.00135	0.0284327	yes	8.14923
TCONS_00018856	XLOC_007507	KCTD12	chr13:77454303-77460540	KO	Rescue	OK	1.68883	0.479886	-1.81526	-8.13382	5e-05	0.00179837	yes	8.13382
TCONS_00049256	XLOC_019698	ETV5	chr3:185764105-185826907	KO	Rescue	OK	1.76909	6.14767	1.79703	8.1317	5e-05	0.00179837	yes	8.1317
TCONS_00013761	XLOC_005493	MMP12	chr11:102733463-102745764	KO	Rescue	OK	56.0868	22.9515	-1.28907	-8.05496	5e-05	0.00179837	yes	8.05496
TCONS_00072550	XLOC_029620	CD24	chrY:21094584-21239302	KO	Rescue	OK	312.49	130.654	-1.25806	-8.04546	5e-05	0.00179837	yes	8.04546
TCONS_00045384	XLOC_018226	POLDIP3	chr22:42979724-43012093	KO	Rescue	OK	44.152	12.2045	-1.85507	-7.86387	5e-05	0.00179837	yes	7.86387
TCONS_00016394	XLOC_006505	EPS8	chr12:15773074-15942510	KO	Rescue	OK	0.919822	0.0706301	-3.703	-7.82342	5e-05	0.00179837	yes	7.82342
TCONS_00029366	XLOC_011735	CCL5	chr17:34198495-34207377	KO	Rescue	OK	6.07982	1.48504	-2.03352	-7.70476	5e-05	0.00179837	yes	7.70476
TCONS_00047289	XLOC_018956	USP13	chr3:179370476-179754841	KO	Rescue	OK	0.64617	8.66879	3.74584	7.60104	5e-05	0.00179837	yes	7.60104
TCONS_00028542	XLOC_011423	TEX19	chr17:80317122-80321652	KO	Rescue	OK	0.871917	3.47898	1.9964	7.53129	5e-05	0.00179837	yes	7.53129
TCONS_00022003	XLOC_008862	LOXL1	chr15:74209808-74244478	KO	Rescue	OK	6.0219	1.9716	-1.61085	-7.45228	5e-05	0.00179837	yes	7.45228
TCONS_00051966	XLOC_020842	ACSL1	chr4:185676748-185747239	KO	Rescue	OK	3.6813	0.428558	-3.10265	-7.28783	5e-05	0.00179837	yes	7.28783
TCONS_00000286	XLOC_000116	TARDBP	chr1:11072605-11085638	KO	Rescue	OK	0.676072	67.3067	6.63743	7.24446	5e-05	0.00179837	yes	7.24446
TCONS_00001951	XLOC_000777	FAM46C	chr1:118148603-118171011	KO	Rescue	OK	7.97548	3.4992	-1.18855	-7.11556	5e-05	0.00179837	yes	7.11556
TCONS_00006144	XLOC_002454	ITLN1	chr1:160846329-160856307	KO	Rescue	OK	3.81981	0.703416	-2.44105	-7.00655	5e-05	0.00179837	yes	7.00655
TCONS_00002519	XLOC_001027	LOC100505633	chr1:159930837-159948876	KO	Rescue	OK	4.34916	0.6968	-2.64192	-6.98212	5e-05	0.00179837	yes	6.98212
TCONS_00001758	XLOC_000699	SYPL2	chr1:110009099-110026283	KO	Rescue	OK	0.538056	1.92455	1.83869	6.93323	5e-05	0.00179837	yes	6.93323
TCONS_00064683	XLOC_026346	PI15	chr8:75736722-75767264	KO	Rescue	OK	0.0753636	4.57974	5.92525	6.90436	5e-05	0.00179837	yes	6.90436
TCONS_00023449	XLOC_009455	MFGE8	chr15:89441913-89456663	KO	Rescue	OK	4.36725	1.30618	-1.74137	-6.8281	5e-05	0.00179837	yes	6.8281
TCONS_00051611	XLOC_020680	SEC24D	chr4:119643977-119757326	KO	Rescue	OK	12.5985	5.77864	-1.12445	-6.82746	5e-05	0.00179837	yes	6.82746
TCONS_00023283	XLOC_009378	CSPG4	chr15:75966662-76005189	KO	Rescue	OK	7.84089	3.67989	-1.09135	-6.75461	5e-05	0.00179837	yes	6.75461
TCONS_00044054	XLOC_017693	GNAZ	chr22:23401592-23484241	KO	Rescue	OK	1.25278	0.244649	-2.35635	-6.73721	5e-05	0.00179837	yes	6.73721
TCONS_00064902	XLOC_026464	NOV	chr8:120428551-120436678	KO	Rescue	OK	21.8153	10.2894	-1.08417	-6.6376	5e-05	0.00179837	yes	6.6376
TCONS_00012040	XLOC_004785	VWA5A	chr11:123986110-124017618	KO	Rescue	OK	1.63373	0.150799	-3.43748	-6.57144	5e-05	0.00179837	yes	6.57144
TCONS_00065854	XLOC_026881	-	chr8:88553243-88579277	KO	Rescue	OK	0.878697	0.136419	-2.68732	-6.56639	5e-05	0.00179837	yes	6.56639
TCONS_00062966	XLOC_025592	-	chr7:44585266-44591505	KO	Rescue	OK	0.402223	0.0355927	-3.49834	-6.55664	5e-05	0.00179837	yes	6.55664
TCONS_00001738	XLOC_000693	KIAA1324	chr1:109642802-109749403	KO	Rescue	OK	4.33615	0.361123	-3.58585	-6.53612	5e-05	0.00179837	yes	6.53612
TCONS_00056726	XLOC_022799	AKAP12	chr6:151561133-151679694	KO	Rescue	OK	0.502995	0.131793	-1.93227	-6.46947	5e-05	0.00179837	yes	6.46947
TCONS_00028143	XLOC_011292	-	chr17:68461113-68461177	KO	Rescue	OK	2961060	8061220	1.44488	6.44742	0.00275	0.0488394	yes	6.44742
TCONS_00029752	XLOC_011896	MEOX1	chr17:41717755-41739319	KO	Rescue	OK	8.08166	2.43027	-1.73354	-6.44248	5e-05	0.00179837	yes	6.44248
TCONS_00071225	XLOC_029073	ELK1	chrX:47491064-47510247	KO	Rescue	OK	8.05376	0.516463	-3.96293	-6.38328	5e-05	0.00179837	yes	6.38328
TCONS_00030992	XLOC_012390	TAF4B	chr18:23806408-23971650	KO	Rescue	OK	2.50685	5.87848	1.22957	6.35962	5e-05	0.00179837	yes	6.35962
TCONS_00068770	XLOC_028107	SVEP1	chr9:113127528-113342518	KO	Rescue	OK	1.26093	3.21358	1.34969	6.30738	5e-05	0.00179837	yes	6.30738
TCONS_00038583	XLOC_015459	ALPP	chr2:233243347-233247599	KO	Rescue	OK	19.6976	39.4039	1.00031	6.28906	5e-05	0.00179837	yes	6.28906
TCONS_00036606	XLOC_014674	EFR3B	chr2:25264972-25382004	KO	Rescue	OK	5.5985	2.71521	-1.04398	-6.26118	5e-05	0.00179837	yes	6.26118
TCONS_00049732	XLOC_019897	-	chr4:19259551-19836640	KO	Rescue	OK	2.37578	0.245712	-3.27336	-6.26021	5e-05	0.00179837	yes	6.26021
TCONS_00058284	XLOC_023418	-	chr6:117527663-117537622	KO	Rescue	OK	0.447334	0.131532	-1.76594	-6.2264	5e-05	0.00179837	yes	6.2264
TCONS_00017242	XLOC_006837	-	chr12:88071879-88200338	KO	Rescue	OK	0.920579	0.196713	-2.22645	-6.2193	5e-05	0.00179837	yes	6.2193
TCONS_00001497	XLOC_000592	PRKACB	chr1:84543744-84704181	KO	Rescue	OK	4.33916	9.34535	1.10683	6.19639	5e-05	0.00179837	yes	6.19639
TCONS_00057439	XLOC_023083	NEU1	chr6:31826828-31830709	KO	Rescue	OK	24.2848	11.9792	-1.01953	-6.19293	5e-05	0.00179837	yes	6.19293
TCONS_00008552	XLOC_003425	PPP2R2D	chr10:133747957-133773406	KO	Rescue	OK	4.10912	13.8978	1.75795	6.17411	5e-05	0.00179837	yes	6.17411
TCONS_00006870	XLOC_002769	PGBD5	chr1:230457391-230561674	KO	Rescue	OK	0.900912	0.192742	-2.22471	-6.17262	5e-05	0.00179837	yes	6.17262
TCONS_00049281	XLOC_019712	-	chr3:187185586-187188055	KO	Rescue	OK	2.49532	0.838384	-1.57354	-6.15767	5e-05	0.00179837	yes	6.15767
TCONS_00045422	XLOC_018241	KIAA1644	chr22:44639547-44727962	KO	Rescue	OK	0.383195	2.63361	2.78089	6.13178	5e-05	0.00179837	yes	6.13178
TCONS_00006610	XLOC_002660	LEMD1	chr1:205342379-205419104	KO	Rescue	OK	7.50306	0.538255	-3.80112	-6.12933	5e-05	0.00179837	yes	6.12933
TCONS_00000463	XLOC_000188	ACTL8	chr1:18081807-18153563	KO	Rescue	OK	0.587113	4.74488	3.01466	6.12356	5e-05	0.00179837	yes	6.12356
TCONS_00014250	XLOC_005654	LOC100292680	chr12:1609147-1617000	KO	Rescue	OK	0.382201	1.87073	2.2912	6.1212	5e-05	0.00179837	yes	6.1212
TCONS_00027933	XLOC_011201	HLF	chr17:53342320-53402426	KO	Rescue	OK	0.72043	0.209047	-1.78503	-6.07254	5e-05	0.00179837	yes	6.07254
TCONS_00070054	XLOC_028609	ZXDB	chrX:57618268-57623910	KO	Rescue	OK	13.3594	25.7725	0.947974	6.07101	5e-05	0.00179837	yes	6.07101
TCONS_00053645	XLOC_021507	-	chr5:852214-859661	KO	Rescue	OK	4.21251	2.02602	-1.05603	-6.06216	5e-05	0.00179837	yes	6.06216
TCONS_00043312	XLOC_017389	COL6A1	chr21:47401662-47424963	KO	Rescue	OK	1.23505	0.408313	-1.59683	-6.055	5e-05	0.00179837	yes	6.055
TCONS_00016916	XLOC_006704	ITGA5	chr12:54789044-54813050	KO	Rescue	OK	13.6099	6.87772	-0.984655	-6.0461	5e-05	0.00179837	yes	6.0461
TCONS_00020106	XLOC_008068	TRAF3	chr14:103243758-103377837	KO	Rescue	OK	1.58262	4.74039	1.58269	6.028	5e-05	0.00179837	yes	6.028
TCONS_00045072	XLOC_018109	SELM	chr22:31500762-31503551	KO	Rescue	OK	63.3699	31.3415	-1.01573	-5.98289	5e-05	0.00179837	yes	5.98289
TCONS_00065269	XLOC_026629	PPP1R3B	chr8:8993763-9009152	KO	Rescue	OK	1.24173	0.465957	-1.41409	-5.9724	5e-05	0.00179837	yes	5.9724
TCONS_00052201	XLOC_020931	-	chr5:24310794-24326440	KO	Rescue	OK	5.64791	2.78368	-1.02072	-5.9684	5e-05	0.00179837	yes	5.9684
TCONS_00029532	XLOC_011791	TNS4	chr17:38627975-38657910	KO	Rescue	OK	15.2662	7.26124	-1.07206	-5.96165	5e-05	0.00179837	yes	5.96165
TCONS_00032662	XLOC_013042	GDF15	chr19:18496967-18499986	KO	Rescue	OK	6.31979	2.3565	-1.42323	-5.95427	5e-05	0.00179837	yes	5.95427
TCONS_00056630	XLOC_022756	TNFAIP3	chr6:138144806-138204451	KO	Rescue	OK	1.77878	0.546271	-1.7032	-5.91516	5e-05	0.00179837	yes	5.91516
TCONS_00016714	XLOC_006628	C1QL4	chr12:49726199-49730971	KO	Rescue	OK	1.70468	0.457616	-1.89729	-5.90986	5e-05	0.00179837	yes	5.90986
TCONS_00053644	XLOC_021506	ZDHHC11	chr5:795719-851101	KO	Rescue	OK	13.9982	6.98059	-1.00382	-5.90226	5e-05	0.00179837	yes	5.90226
TCONS_00064484	XLOC_026250	C8orf4	chr8:40010986-40012827	KO	Rescue	OK	15.5568	7.65505	-1.02306	-5.83477	5e-05	0.00179837	yes	5.83477
TCONS_00047658	XLOC_019108	NUP210	chr3:13357486-13461836	KO	Rescue	OK	19.4807	36.9696	0.924295	5.83042	5e-05	0.00179837	yes	5.83042
TCONS_00056633	XLOC_022757	KIAA1244	chr6:138483052-138665800	KO	Rescue	OK	0.66882	0.285656	-1.22734	-5.82969	5e-05	0.00179837	yes	5.82969
TCONS_00060938	XLOC_024771	IQCE	chr7:2598589-2654458	KO	Rescue	OK	2.57376	0.163221	-3.97897	-5.82772	5e-05	0.00179837	yes	5.82772
TCONS_00049280	XLOC_019711	-	chr3:187184039-187185393	KO	Rescue	OK	3.6478	1.1935	-1.61182	-5.81328	5e-05	0.00179837	yes	5.81328
TCONS_00016805	XLOC_006665	KRT5	chr12:52908358-52914243	KO	Rescue	OK	2.53209	0.020746	-6.93135	-5.81075	0.00265	0.0475015	yes	5.81075
TCONS_00030009	XLOC_012016	DLX3	chr17:48067368-48072588	KO	Rescue	OK	3.63335	1.5192	-1.25798	-5.80466	5e-05	0.00179837	yes	5.80466
TCONS_00014421	XLOC_005719	C1S	chr12:7167979-7178335	KO	Rescue	OK	13.0227	5.65505	-1.20341	-5.79487	5e-05	0.00179837	yes	5.79487
TCONS_00016672	XLOC_006614	-	chr12:49295629-49297866	KO	Rescue	OK	1.02678	0.191875	-2.41989	-5.76679	5e-05	0.00179837	yes	5.76679
TCONS_00003579	XLOC_001455	SCCPDH	chr1:246887321-246931440	KO	Rescue	OK	6.35097	2.45921	-1.36878	-5.75923	5e-05	0.00179837	yes	5.75923
TCONS_00024512	XLOC_009828	GPT2	chr16:46918189-46965201	KO	Rescue	OK	7.77232	17.2851	1.15311	5.7506	5e-05	0.00179837	yes	5.7506
TCONS_00021605	XLOC_008707	HAUS2	chr15:42841010-42862720	KO	Rescue	OK	6.42004	13.4098	1.06263	5.68526	5e-05	0.00179837	yes	5.68526
TCONS_00036856	XLOC_014775	EPAS1	chr2:46524540-46613842	KO	Rescue	OK	45.148	24.5784	-0.877271	-5.66479	5e-05	0.00179837	yes	5.66479
TCONS_00028443	XLOC_011386	RPTOR	chr17:78518609-78940381	KO	Rescue	OK	11.3202	21.4901	0.92477	5.63312	5e-05	0.00179837	yes	5.63312
TCONS_00038767	XLOC_015521	ATG4B	chr2:242577026-242613271	KO	Rescue	OK	0.153315	7.68598	5.64766	5.62899	5e-05	0.00179837	yes	5.62899
TCONS_00036306	XLOC_014530	PPP6R1	chr19:55737606-55770498	KO	Rescue	OK	21.9781	43.5654	0.987116	5.62577	5e-05	0.00179837	yes	5.62577
TCONS_00010485	XLOC_004162	TMEM86A	chr11:18720350-18747777	KO	Rescue	OK	0.487926	0.0435006	-3.48756	-5.62182	5e-05	0.00179837	yes	5.62182
TCONS_00045191	XLOC_018156	ELFN2	chr22:37763999-37823505	KO	Rescue	OK	0.51628	0.176359	-1.54964	-5.60631	5e-05	0.00179837	yes	5.60631
TCONS_00014668	XLOC_005830	PDE3A	chr12:20521195-20837041	KO	Rescue	OK	11.4579	24.9981	1.12548	5.60152	5e-05	0.00179837	yes	5.60152
TCONS_00000847	XLOC_000339	GJB3	chr1:35246789-35251967	KO	Rescue	OK	2.66211	0.625942	-2.08847	-5.5915	5e-05	0.00179837	yes	5.5915
TCONS_00040982	XLOC_016452	SIRPA	chr20:1874812-1920540	KO	Rescue	OK	1.028	0.16009	-2.68288	-5.55636	5e-05	0.00179837	yes	5.55636
TCONS_00012254	XLOC_004861	CHID1	chr11:867443-915058	KO	Rescue	OK	0.179782	3.3708	4.22877	5.54641	5e-05	0.00179837	yes	5.54641
TCONS_00037402	XLOC_014997	IL1R1	chr2:102770401-102796334	KO	Rescue	OK	0.335084	0.0391571	-3.09718	-5.53981	5e-05	0.00179837	yes	5.53981
TCONS_00014315	XLOC_005672	CCND2	chr12:4382901-4414522	KO	Rescue	OK	0.0064281	0.679708	6.72438	5.49917	0.0001	0.00333804	yes	5.49917
TCONS_00062286	XLOC_025313	TMEM178B	chr7:140774031-141180179	KO	Rescue	OK	0.986445	0.212569	-2.21431	-5.49688	5e-05	0.00179837	yes	5.49688
TCONS_00011391	XLOC_004519	ALDH3B1	chr11:67776047-67796751	KO	Rescue	OK	10.8537	27.1318	1.3218	5.49621	5e-05	0.00179837	yes	5.49621
TCONS_00063957	XLOC_026035	TMEM176B	chr7:150488375-150522649	KO	Rescue	OK	9.93195	0.975981	-3.34715	-5.48719	5e-05	0.00179837	yes	5.48719
TCONS_00047283	XLOC_018956	USP13	chr3:179370476-179754841	KO	Rescue	OK	1.56367	6.0478	1.95148	5.4253	5e-05	0.00179837	yes	5.4253
TCONS_00046769	XLOC_018735	EAF2	chr3:121554033-121605373	KO	Rescue	OK	3.07238	0.848515	-1.85634	-5.39585	5e-05	0.00179837	yes	5.39585
TCONS_00069513	XLOC_028390	WWC3	chrX:9983794-10112518	KO	Rescue	OK	0.229239	0.0170856	-3.746	-5.39313	5e-05	0.00179837	yes	5.39313
TCONS_00030561	XLOC_012227	NPTX1	chr17:78440491-78451318	KO	Rescue	OK	60.4721	108.565	0.844214	5.34771	5e-05	0.00179837	yes	5.34771
TCONS_00011761	XLOC_004672	BIRC3	chr11:102188180-102210135	KO	Rescue	OK	2.73631	1.36434	-1.00402	-5.3203	5e-05	0.00179837	yes	5.3203
TCONS_00029849	XLOC_011936	C1QL1	chr17:43037060-43045644	KO	Rescue	OK	22.3601	11.9117	-0.90855	-5.31778	5e-05	0.00179837	yes	5.31778
TCONS_00021268	XLOC_008519	-	chr15:20553541-20582335	KO	Rescue	OK	4.02804	0.474328	-3.08612	-5.30301	5e-05	0.00179837	yes	5.30301
TCONS_00064051	XLOC_026077	NCAPG2	chr7:158424002-158497544	KO	Rescue	OK	11.7706	29.6928	1.33493	5.303	5e-05	0.00179837	yes	5.303
TCONS_00054748	XLOC_021974	ARSI	chr5:149675908-149682525	KO	Rescue	OK	0.838601	0.234379	-1.83914	-5.28935	5e-05	0.00179837	yes	5.28935
TCONS_00022778	XLOC_009197	FBN1	chr15:48700502-48937985	KO	Rescue	OK	4.89491	2.70481	-0.855753	-5.2778	5e-05	0.00179837	yes	5.2778
TCONS_00034575	XLOC_013823	CD70	chr19:6581600-6604097	KO	Rescue	OK	76.0276	36.4328	-1.06128	-5.23127	5e-05	0.00179837	yes	5.23127
TCONS_00046989	XLOC_018835	IL20RB	chr3:136676492-136729927	KO	Rescue	OK	5.66676	1.62653	-1.80073	-5.22998	5e-05	0.00179837	yes	5.22998
TCONS_00046621	XLOC_018667	TMEM45A	chr3:100211024-100296286	KO	Rescue	OK	9.30738	3.9096	-1.25136	-5.22722	5e-05	0.00179837	yes	5.22722
TCONS_00045273	XLOC_018182	NPTXR	chr22:39214455-39240017	KO	Rescue	OK	2.46991	1.23144	-1.00412	-5.22623	5e-05	0.00179837	yes	5.22623
TCONS_00000548	XLOC_000221	EPHB2	chr1:23037306-23241823	KO	Rescue	OK	1.24208	0.317029	-1.97007	-5.21542	5e-05	0.00179837	yes	5.21542
TCONS_00056823	XLOC_022839	IGF2R	chr6:160390062-160532517	KO	Rescue	OK	12.3201	22.1398	0.845623	5.21265	5e-05	0.00179837	yes	5.21265
TCONS_00027041	XLOC_010857	TRIM16L	chr17:18625401-18642344	KO	Rescue	OK	26.2114	46.632	0.831123	5.18219	5e-05	0.00179837	yes	5.18219
TCONS_00017260	XLOC_006847	DUSP6	chr12:89741836-89746296	KO	Rescue	OK	0.572301	1.56597	1.45221	5.16935	5e-05	0.00179837	yes	5.16935
TCONS_00010922	XLOC_004335	DTX4	chr11:58939811-58980494	KO	Rescue	OK	3.70448	6.72313	0.85986	5.16504	5e-05	0.00179837	yes	5.16504
TCONS_00012298	XLOC_004883	CDKN1C	chr11:2904447-2906995	KO	Rescue	OK	27.4713	14.154	-0.956713	-5.15632	5e-05	0.00179837	yes	5.15632
TCONS_00003079	XLOC_001267	RASSF5	chr1:206680878-206762658	KO	Rescue	OK	8.45802	4.45295	-0.925558	-5.14572	5e-05	0.00179837	yes	5.14572
TCONS_00056281	XLOC_022591	NT5E	chr6:86159301-86205509	KO	Rescue	OK	0.811977	0.208128	-1.96397	-5.12798	5e-05	0.00179837	yes	5.12798
TCONS_00061096	XLOC_024830	GPNMB	chr7:23286288-23314729	KO	Rescue	OK	3.33367	0.599053	-2.47635	-5.10925	5e-05	0.00179837	yes	5.10925
TCONS_00008257	XLOC_003311	ELOVL3	chr10:103986142-103989344	KO	Rescue	OK	5.1411	2.19254	-1.22947	-5.10486	5e-05	0.00179837	yes	5.10486
TCONS_00026998	XLOC_010838	-	chr17:16931492-16933943	KO	Rescue	OK	0.834246	0.177387	-2.23357	-5.10433	5e-05	0.00179837	yes	5.10433
TCONS_00046620	XLOC_018667	TMEM45A	chr3:100211024-100296286	KO	Rescue	OK	4.30149	1.33121	-1.6921	-5.10247	5e-05	0.00179837	yes	5.10247
TCONS_00062446	XLOC_025387	TMEM176A	chr7:150488375-150522649	KO	Rescue	OK	7.18507	0.210593	-5.09247	-5.09963	5e-05	0.00179837	yes	5.09963
TCONS_00049296	XLOC_019719	CLDN1	chr3:190023489-190040235	KO	Rescue	OK	0.945016	0.32042	-1.56037	-5.08854	5e-05	0.00179837	yes	5.08854
TCONS_00047414	XLOC_019002	ST6GAL1	chr3:186648314-186796341	KO	Rescue	OK	5.78017	1.11198	-2.37798	-5.08501	5e-05	0.00179837	yes	5.08501
TCONS_00064163	XLOC_026137	ZDHHC2	chr8:17013485-17083158	KO	Rescue	OK	1.08851	2.43416	1.16108	5.07202	5e-05	0.00179837	yes	5.07202
TCONS_00007416	XLOC_002977	-	chr10:33271020-33371030	KO	Rescue	OK	0.666145	0.213544	-1.6413	-5.06076	5e-05	0.00179837	yes	5.06076
TCONS_00053814	XLOC_021591	AMACR	chr5:33985479-34175616	KO	Rescue	OK	2.16446	6.33779	1.54997	5.05528	5e-05	0.00179837	yes	5.05528
TCONS_00066370	XLOC_027103	-	chr8:144972593-144978349	KO	Rescue	OK	0.361033	0.0441203	-3.03262	-5.05184	5e-05	0.00179837	yes	5.05184
TCONS_00053811	XLOC_021591	AMACR	chr5:33985479-34175616	KO	Rescue	OK	2.60065	0.130124	-4.32091	-5.04775	5e-05	0.00179837	yes	5.04775
TCONS_00007735	XLOC_003107	HK1	chr10:71029755-71161637	KO	Rescue	OK	2.64999	0.621875	-2.09129	-5.02227	5e-05	0.00179837	yes	5.02227
TCONS_00001741	XLOC_000696	C1orf194	chr1:109642802-109749403	KO	Rescue	OK	3.65137	0.105225	-5.11689	-5.01773	0.0001	0.00333804	yes	5.01773
TCONS_00035256	XLOC_014095	CEBPA	chr19:33790839-33793430	KO	Rescue	OK	47.0907	27.3615	-0.783297	-5.00443	5e-05	0.00179837	yes	5.00443
TCONS_00019392	XLOC_007760	GPR137C	chr14:53019865-53104431	KO	Rescue	OK	0.627379	0.183732	-1.77173	-4.99377	5e-05	0.00179837	yes	4.99377
TCONS_00021009	XLOC_008434	FBLN5	chr14:92335754-92414283	KO	Rescue	OK	3.30544	0.823656	-2.00473	-4.97935	5e-05	0.00179837	yes	4.97935
TCONS_00067084	XLOC_027386	PHF2	chr9:96338173-96441870	KO	Rescue	OK	6.13677	0.0839397	-6.19198	-4.97899	0.00015	0.00477533	yes	4.97899
TCONS_00068523	XLOC_027993	GAS1	chr9:89559276-89562104	KO	Rescue	OK	37.9993	22.1321	-0.779832	-4.96467	5e-05	0.00179837	yes	4.96467
TCONS_00057189	XLOC_022992	HIST1H2BK	chr6:27106071-27114637	KO	Rescue	OK	75.6179	43.5167	-0.79716	-4.90223	5e-05	0.00179837	yes	4.90223
TCONS_00029593	XLOC_011845	KRT17	chr17:39775688-39781015	KO	Rescue	OK	40.8355	13.6655	-1.57929	-4.89913	5e-05	0.00179837	yes	4.89913
TCONS_00014581	XLOC_005788	GPRC5A	chr12:13043602-13071080	KO	Rescue	OK	40.8605	23.1769	-0.818017	-4.88739	5e-05	0.00179837	yes	4.88739
TCONS_00039710	XLOC_015923	MGAT4A	chr2:99235568-99347589	KO	Rescue	OK	3.04069	1.60026	-0.926088	-4.88226	5e-05	0.00179837	yes	4.88226
TCONS_00035662	XLOC_014262	-	chr19:43827709-43833606	KO	Rescue	OK	1.70125	0.846347	-1.00727	-4.87617	5e-05	0.00179837	yes	4.87617
TCONS_00000464	XLOC_000188	ACTL8	chr1:18081807-18153563	KO	Rescue	OK	0.485269	3.56764	2.87811	4.87007	5e-05	0.00179837	yes	4.87007
TCONS_00053999	XLOC_021677	PLK2	chr5:57749809-57755966	KO	Rescue	OK	67.4396	39.7961	-0.760968	-4.86972	5e-05	0.00179837	yes	4.86972
TCONS_00068241	XLOC_027853	ENHO	chr9:34521039-34523037	KO	Rescue	OK	1.65315	0.347804	-2.24887	-4.8494	5e-05	0.00179837	yes	4.8494
TCONS_00025235	XLOC_010090	TCF25	chr16:89939292-89987385	KO	Rescue	OK	12.855	31.4378	1.29017	4.8444	5e-05	0.00179837	yes	4.8444
TCONS_00032380	XLOC_012926	SMARCA4	chr19:11071457-11172958	KO	Rescue	OK	30.5014	6.01035	-2.34336	-4.83391	5e-05	0.00179837	yes	4.83391
TCONS_00068199	XLOC_027831	-	chr9:33226240-33231431	KO	Rescue	OK	0.257222	0.043217	-2.57334	-4.83302	5e-05	0.00179837	yes	4.83302
TCONS_00019016	XLOC_007595	RAB20	chr13:111175410-111214109	KO	Rescue	OK	7.27924	0.962422	-2.91905	-4.82716	5e-05	0.00179837	yes	4.82716
TCONS_00039000	XLOC_015609	KIF3C	chr2:26149454-26205443	KO	Rescue	OK	2.36343	1.23091	-0.941155	-4.8119	5e-05	0.00179837	yes	4.8119
TCONS_00052501	XLOC_021054	CDK7	chr5:68530621-68573257	KO	Rescue	OK	13.8931	24.3525	0.809702	4.81038	5e-05	0.00179837	yes	4.81038
TCONS_00063009	XLOC_025612	IGFBP3	chr7:45951843-45960871	KO	Rescue	OK	8.42447	14.7586	0.808903	4.80867	5e-05	0.00179837	yes	4.80867
TCONS_00041127	XLOC_016510	ISM1	chr20:13202417-13281297	KO	Rescue	OK	2.06832	0.900198	-1.20015	-4.80385	5e-05	0.00179837	yes	4.80385
TCONS_00036784	XLOC_014739	VIT	chr2:36923832-37041937	KO	Rescue	OK	3.92636	1.14012	-1.784	-4.79361	5e-05	0.00179837	yes	4.79361
TCONS_00013024	XLOC_005205	FADS3	chr11:61640991-61659080	KO	Rescue	OK	10.262	21.9493	1.09686	4.79177	5e-05	0.00179837	yes	4.79177
TCONS_00053387	XLOC_021384	GABRA1	chr5:161274196-161326965	KO	Rescue	OK	0.0219057	0.315286	3.84728	4.78115	0.0001	0.00333804	yes	4.78115
TCONS_00017151	XLOC_006796	PTPRR	chr12:71031852-71314584	KO	Rescue	OK	9.9443	4.99547	-0.993249	-4.7729	5e-05	0.00179837	yes	4.7729
TCONS_00067694	XLOC_027602	AIF1L	chr9:133971862-133998539	KO	Rescue	OK	10.8244	18.6251	0.782959	4.76448	5e-05	0.00179837	yes	4.76448
TCONS_00036783	XLOC_014738	CRIM1	chr2:36582865-36778428	KO	Rescue	OK	42.949	23.8447	-0.848956	-4.76282	5e-05	0.00179837	yes	4.76282
TCONS_00063052	XLOC_025624	COBL	chr7:51083908-51384622	KO	Rescue	OK	0.477474	6.25153	3.71072	4.76191	5e-05	0.00179837	yes	4.76191
TCONS_00043701	XLOC_017551	-	chr21:44237251-44244627	KO	Rescue	OK	0.37912	0.130234	-1.54155	-4.75202	5e-05	0.00179837	yes	4.75202
TCONS_00067260	XLOC_027452	ZNF462	chr9:109625377-109848716	KO	Rescue	OK	0.200337	0.0474212	-2.07883	-4.74452	5e-05	0.00179837	yes	4.74452
TCONS_00062990	XLOC_025606	NACAD	chr7:45120035-45128493	KO	Rescue	OK	0.0332037	0.294032	3.14656	4.74037	5e-05	0.00179837	yes	4.74037
TCONS_00010393	XLOC_004118	ADM	chr11:10326641-10328923	KO	Rescue	OK	4.08235	7.97433	0.965965	4.73566	5e-05	0.00179837	yes	4.73566
TCONS_00017023	XLOC_006744	TAC3	chr12:57403780-57410684	KO	Rescue	OK	10.9261	4.95873	-1.13973	-4.7271	5e-05	0.00179837	yes	4.7271
TCONS_00051142	XLOC_020494	SCFD2	chr4:53739150-54232242	KO	Rescue	OK	2.23256	4.74585	1.08797	4.70661	5e-05	0.00179837	yes	4.70661
TCONS_00033720	XLOC_013439	-	chr19:50441885-50444992	KO	Rescue	OK	0.399706	0.0497492	-3.00619	-4.70536	5e-05	0.00179837	yes	4.70536
TCONS_00039164	XLOC_015689	C2orf91	chr2:42162497-42224234	KO	Rescue	OK	0.425737	0.0620861	-2.77762	-4.70313	5e-05	0.00179837	yes	4.70313
TCONS_00043077	XLOC_017291	ETS2	chr21:40177047-40196881	KO	Rescue	OK	11.0512	0.786193	-3.81318	-4.69392	5e-05	0.00179837	yes	4.69392
TCONS_00036469	XLOC_014609	-	chr2:881512-887210	KO	Rescue	OK	0.334631	0.782819	1.22611	4.68086	5e-05	0.00179837	yes	4.68086
TCONS_00038584	XLOC_015460	ALPPL2	chr2:233271551-233275424	KO	Rescue	OK	0.693734	1.67876	1.27494	4.66882	5e-05	0.00179837	yes	4.66882
TCONS_00009448	XLOC_003730	DLG5	chr10:79550125-79689583	KO	Rescue	OK	4.57232	0.389002	-3.55508	-4.66522	5e-05	0.00179837	yes	4.66522
TCONS_00003611	XLOC_001483	-	chr1:248465899-248493110	KO	Rescue	OK	1.78806	0.657014	-1.4444	-4.65912	5e-05	0.00179837	yes	4.65912
TCONS_00048707	XLOC_019486	SLC12A8	chr3:124801479-124931609	KO	Rescue	OK	0.416827	0.0872988	-2.25542	-4.65704	5e-05	0.00179837	yes	4.65704
TCONS_00058339	XLOC_023440	ARHGAP18	chr6:129897277-130031435	KO	Rescue	OK	12.5646	22.1032	0.81489	4.65652	5e-05	0.00179837	yes	4.65652
TCONS_00050639	XLOC_020278	LOC100506013	chr4:165798155-165818676	KO	Rescue	OK	1.04532	0.361625	-1.53137	-4.65223	5e-05	0.00179837	yes	4.65223
TCONS_00006032	XLOC_002403	CRABP2	chr1:156669369-156686462	KO	Rescue	OK	338.516	202.327	-0.742537	-4.64966	5e-05	0.00179837	yes	4.64966
TCONS_00014845	XLOC_005889	TMEM117	chr12:44229555-44783541	KO	Rescue	OK	0.334832	2.49204	2.89582	4.63991	5e-05	0.00179837	yes	4.63991
TCONS_00070074	XLOC_028619	EFNB1	chrX:68048839-68062006	KO	Rescue	OK	6.27546	3.52677	-0.831374	-4.63708	5e-05	0.00179837	yes	4.63708
TCONS_00051565	XLOC_020661	CFI	chr4:110661847-110723335	KO	Rescue	OK	0.710739	0.156596	-2.18227	-4.63628	5e-05	0.00179837	yes	4.63628
TCONS_00044599	XLOC_017904	FBLN1	chr22:45898718-45997014	KO	Rescue	OK	93.3123	52.0499	-0.842171	-4.63491	5e-05	0.00179837	yes	4.63491
TCONS_00058711	XLOC_023617	-	chr6:170465683-170469682	KO	Rescue	OK	0.146406	0.504972	1.78623	4.62981	5e-05	0.00179837	yes	4.62981
TCONS_00027319	XLOC_010978	SLFN5	chr17:33570051-33600629	KO	Rescue	OK	1.91569	0.756028	-1.34135	-4.62652	5e-05	0.00179837	yes	4.62652
TCONS_00010844	XLOC_004312	RTN4RL2	chr11:57227560-57245009	KO	Rescue	OK	25.0204	43.3064	0.791478	4.62551	5e-05	0.00179837	yes	4.62551
TCONS_00054909	XLOC_022047	DUSP1	chr5:172195092-172198203	KO	Rescue	OK	24.9507	14.8089	-0.752617	-4.61562	5e-05	0.00179837	yes	4.61562
TCONS_00053007	XLOC_021250	TGFBI	chr5:135364583-135399507	KO	Rescue	OK	12.6233	7.36562	-0.777215	-4.61322	5e-05	0.00179837	yes	4.61322
TCONS_00058637	XLOC_023566	-	chr6:166188123-166209601	KO	Rescue	OK	0.67622	1.24559	0.881263	4.60588	5e-05	0.00179837	yes	4.60588
TCONS_00010129	XLOC_003998	IFITM1	chr11:309565-315272	KO	Rescue	OK	53.109	30.5007	-0.800113	-4.58611	5e-05	0.00179837	yes	4.58611
TCONS_00069218	XLOC_028270	-	chr9:137514715-137516854	KO	Rescue	OK	0.67725	0.143961	-2.23401	-4.57039	5e-05	0.00179837	yes	4.57039
TCONS_00009812	XLOC_003880	COL17A1	chr10:105791043-105845638	KO	Rescue	OK	0.560577	0.0261048	-4.42453	-4.56316	0.00035	0.00974863	yes	4.56316
TCONS_00063689	XLOC_025909	GPR37	chr7:124385654-124406079	KO	Rescue	OK	2.71797	4.84114	0.832816	4.54916	5e-05	0.00179837	yes	4.54916
TCONS_00048250	XLOC_019311	TNNC1	chr3:52485106-52488057	KO	Rescue	OK	16.4053	8.46068	-0.955315	-4.5367	5e-05	0.00179837	yes	4.5367
TCONS_00028080	XLOC_011265	MILR1	chr17:62461568-62464760	KO	Rescue	OK	3.36223	0.874042	-1.94364	-4.52703	5e-05	0.00179837	yes	4.52703
TCONS_00031165	XLOC_012446	RAB27B	chr18:52495524-52562800	KO	Rescue	OK	2.04989	0.80929	-1.34082	-4.52457	5e-05	0.00179837	yes	4.52457
TCONS_00063963	XLOC_026035	TMEM176B	chr7:150488375-150522649	KO	Rescue	OK	8.75426	0.331783	-4.72167	-4.52086	0.0002	0.00609992	yes	4.52086
TCONS_00030827	XLOC_012330	ARHGAP28	chr18:6728982-6915713	KO	Rescue	OK	1.12045	2.41579	1.10841	4.51933	5e-05	0.00179837	yes	4.51933
TCONS_00009194	XLOC_003651	SLC16A9	chr10:61410519-61469649	KO	Rescue	OK	2.20904	0.949078	-1.21882	-4.5029	5e-05	0.00179837	yes	4.5029
TCONS_00013871	XLOC_005529	CRYAB	chr11:111779349-111797595	KO	Rescue	OK	14.7343	2.04892	-2.84624	-4.49994	5e-05	0.00179837	yes	4.49994
TCONS_00061245	XLOC_024890	EEPD1	chr7:36192835-36341152	KO	Rescue	OK	0.282173	0.0594747	-2.24623	-4.49019	5e-05	0.00179837	yes	4.49019
TCONS_00065649	XLOC_026792	SDR16C5	chr8:57212569-57233241	KO	Rescue	OK	5.16511	2.88232	-0.841569	-4.47443	5e-05	0.00179837	yes	4.47443
TCONS_00006172	XLOC_002470	ADAMTS4	chr1:161159537-161168868	KO	Rescue	OK	1.6338	0.355711	-2.19945	-4.47431	5e-05	0.00179837	yes	4.47431
TCONS_00065851	XLOC_026878	-	chr8:88553243-88579277	KO	Rescue	OK	1.22885	0.101169	-3.60246	-4.4551	0.0001	0.00333804	yes	4.4551
TCONS_00027903	XLOC_011189	ABCC3	chr17:48712192-48769234	KO	Rescue	OK	1.29664	2.80232	1.11185	4.44718	5e-05	0.00179837	yes	4.44718
TCONS_00032446	XLOC_012954	JUNB	chr19:12902309-12904125	KO	Rescue	OK	32.9736	20.1236	-0.712428	-4.4144	5e-05	0.00179837	yes	4.4144
TCONS_00049498	XLOC_019800	MAEA	chr4:1283573-1333927	KO	Rescue	OK	16.5287	28.7904	0.800616	4.38353	5e-05	0.00179837	yes	4.38353
TCONS_00021107	XLOC_008458	CLMN	chr14:95648275-95786245	KO	Rescue	OK	2.58065	0.902004	-1.51653	-4.37723	5e-05	0.00179837	yes	4.37723
TCONS_00007337	XLOC_002950	OTUD1	chr10:23728197-23731310	KO	Rescue	OK	1.80349	0.866225	-1.05797	-4.3768	5e-05	0.00179837	yes	4.3768
TCONS_00020852	XLOC_008377	-	chr14:74289277-74296814	KO	Rescue	OK	1.46533	0.371198	-1.98097	-4.36801	5e-05	0.00179837	yes	4.36801
TCONS_00048944	XLOC_019579	PLOD2	chr3:145787227-145881507	KO	Rescue	OK	117.31	67.1064	-0.805798	-4.36612	5e-05	0.00179837	yes	4.36612
TCONS_00030790	XLOC_012313	NDC80	chr18:2537523-2616634	KO	Rescue	OK	8.92632	0.697832	-3.67711	-4.3596	5e-05	0.00179837	yes	4.3596
TCONS_00051670	XLOC_020713	SLC7A11	chr4:138948576-139163587	KO	Rescue	OK	2.83422	4.91852	0.795273	4.34855	5e-05	0.00179837	yes	4.34855
TCONS_00021852	XLOC_008798	USP3	chr15:63796671-63894620	KO	Rescue	OK	3.59801	7.87756	1.13055	4.34533	5e-05	0.00179837	yes	4.34533
TCONS_00016671	XLOC_006613	RND1	chr12:49250915-49259653	KO	Rescue	OK	1.99248	0.816091	-1.28776	-4.34515	5e-05	0.00179837	yes	4.34515
TCONS_00039577	XLOC_015864	REEP1	chr2:86441119-86565206	KO	Rescue	OK	4.71025	2.67976	-0.813703	-4.34052	5e-05	0.00179837	yes	4.34052
TCONS_00011584	XLOC_004587	DGAT2	chr11:75479777-75512581	KO	Rescue	OK	4.00739	2.15523	-0.894821	-4.32958	5e-05	0.00179837	yes	4.32958
TCONS_00023307	XLOC_009387	TSPAN3	chr15:77336359-77363570	KO	Rescue	OK	56.8457	35.7065	-0.670863	-4.32918	5e-05	0.00179837	yes	4.32918
TCONS_00025715	XLOC_010289	LOC100190986	chr16:21443344-21445776	KO	Rescue	OK	1.90252	3.61958	0.927913	4.32618	5e-05	0.00179837	yes	4.32618
TCONS_00021264	XLOC_008519	-	chr15:20553541-20582335	KO	Rescue	OK	0.332017	4.24863	3.67767	4.32244	5e-05	0.00179837	yes	4.32244
TCONS_00055716	XLOC_022368	HSPA1A	chr6:31783290-31785719	KO	Rescue	OK	31.2658	49.9867	0.676957	4.32072	5e-05	0.00179837	yes	4.32072
TCONS_00013023	XLOC_005205	FADS3	chr11:61640991-61659080	KO	Rescue	OK	1.43833	5.89749	2.0357	4.31923	5e-05	0.00179837	yes	4.31923
TCONS_00025736	XLOC_010306	USP31	chr16:23072639-23160783	KO	Rescue	OK	0.66947	2.10833	1.65501	4.31257	5e-05	0.00179837	yes	4.31257
TCONS_00064207	XLOC_026147	LPL	chr8:19796581-19824770	KO	Rescue	OK	30.3776	19.0028	-0.676798	-4.31227	5e-05	0.00179837	yes	4.31227
TCONS_00013874	XLOC_005529	CRYAB	chr11:111779349-111797595	KO	Rescue	OK	18.7814	3.90725	-2.26508	-4.31112	5e-05	0.00179837	yes	4.31112
TCONS_00069129	XLOC_028233	PTGES	chr9:132500614-132515344	KO	Rescue	OK	28.6715	17.6236	-0.702108	-4.31066	5e-05	0.00179837	yes	4.31066
TCONS_00011496	XLOC_004555	FOLR1	chr11:71900601-71907367	KO	Rescue	OK	45.782	15.9821	-1.51832	-4.31009	5e-05	0.00179837	yes	4.31009
TCONS_00053267	XLOC_021336	AFAP1L1	chr5:148651303-148722154	KO	Rescue	OK	3.73749	2.07707	-0.847522	-4.30313	5e-05	0.00179837	yes	4.30313
TCONS_00057036	XLOC_022935	NEDD9	chr6:11183502-11382581	KO	Rescue	OK	27.785	17.2606	-0.686829	-4.29429	5e-05	0.00179837	yes	4.29429
TCONS_00017957	XLOC_007115	MTUS2	chr13:29598747-30080084	KO	Rescue	OK	0.289954	0.0476632	-2.60488	-4.29213	5e-05	0.00179837	yes	4.29213
TCONS_00030535	XLOC_012218	-	chr17:77727123-77744322	KO	Rescue	OK	3.88739	6.45336	0.731249	4.28727	5e-05	0.00179837	yes	4.28727
TCONS_00042198	XLOC_016940	-	chr20:23607248-23614221	KO	Rescue	OK	0.658396	0.163085	-2.01333	-4.28661	5e-05	0.00179837	yes	4.28661
TCONS_00012942	XLOC_005161	SLC43A3	chr11:57174421-57195053	KO	Rescue	OK	94.6044	161.147	0.768397	4.28648	5e-05	0.00179837	yes	4.28648
TCONS_00002246	XLOC_000940	S100A9	chr1:153330329-153333503	KO	Rescue	OK	2.48788	0.26246	-3.24475	-4.28541	5e-05	0.00179837	yes	4.28541
TCONS_00046573	XLOC_018643	-	chr3:93848621-93851081	KO	Rescue	OK	0.614427	1.43131	1.22002	4.28276	5e-05	0.00179837	yes	4.28276
TCONS_00019936	XLOC_007954	EML1	chr14:100259502-100408518	KO	Rescue	OK	2.29649	1.0448	-1.1362	-4.28169	5e-05	0.00179837	yes	4.28169
TCONS_00011338	XLOC_004504	C11orf86	chr11:66742574-66744482	KO	Rescue	OK	22.5219	11.9821	-0.910443	-4.28063	5e-05	0.00179837	yes	4.28063
TCONS_00055823	XLOC_022405	ITPR3	chr6:33589072-33664348	KO	Rescue	OK	8.89935	18.1016	1.02434	4.27763	5e-05	0.00179837	yes	4.27763
TCONS_00056942	XLOC_022895	-	chr6:3904346-3908681	KO	Rescue	OK	0.305961	0.0738909	-2.04988	-4.27417	5e-05	0.00179837	yes	4.27417
TCONS_00004093	XLOC_001664	HP1BP3	chr1:21068062-21114018	KO	Rescue	OK	23.1936	41.1068	0.825652	4.26709	5e-05	0.00179837	yes	4.26709
TCONS_00066369	XLOC_027102	-	chr8:144968061-144971648	KO	Rescue	OK	0.451303	0.0145694	-4.95309	-4.26506	0.00265	0.0475015	yes	4.26506
TCONS_00022221	XLOC_008962	LINC00052	chr15:88120159-88122917	KO	Rescue	OK	40.5019	25.2051	-0.684274	-4.26302	5e-05	0.00179837	yes	4.26302
TCONS_00061079	XLOC_024826	IL6	chr7:22766765-22771621	KO	Rescue	OK	0.937507	0.05618	-4.0607	-4.24851	0.00265	0.0475015	yes	4.24851
TCONS_00018841	XLOC_007500	DACH1	chr13:72012097-72441330	KO	Rescue	OK	0.2115	0.0322416	-2.71367	-4.24368	5e-05	0.00179837	yes	4.24368
TCONS_00048024	XLOC_019238	SHISA5	chr3:48488113-48542259	KO	Rescue	OK	11.617	25.1047	1.11172	4.23955	5e-05	0.00179837	yes	4.23955
TCONS_00016909	XLOC_006701	NFE2	chr12:54685890-54694821	KO	Rescue	OK	1.79692	0.651434	-1.46383	-4.2381	5e-05	0.00179837	yes	4.2381
TCONS_00023737	XLOC_009565	SNHG9	chr16:2014996-2015505	KO	Rescue	OK	78.6529	39.9729	-0.97648	-4.23381	5e-05	0.00179837	yes	4.23381
TCONS_00035624	XLOC_014245	CNFN	chr19:42891170-42894444	KO	Rescue	OK	6.48596	2.50693	-1.3714	-4.19563	5e-05	0.00179837	yes	4.19563
TCONS_00011675	XLOC_004622	OR7E2P	chr11:86534417-86647218	KO	Rescue	OK	0.434017	1.01389	1.22408	4.1951	5e-05	0.00179837	yes	4.1951
TCONS_00068877	XLOC_028150	CDK5RAP2	chr9:123151146-123342448	KO	Rescue	OK	8.68197	3.79376	-1.19439	-4.19094	5e-05	0.00179837	yes	4.19094
TCONS_00022316	XLOC_009008	SLCO3A1	chr15:92396387-92715665	KO	Rescue	OK	7.92116	13.525	0.771851	4.18708	5e-05	0.00179837	yes	4.18708
TCONS_00071930	XLOC_029357	MBNL3	chrX:131503342-131624203	KO	Rescue	OK	0.469897	1.99211	2.08388	4.17437	5e-05	0.00179837	yes	4.17437
TCONS_00004346	XLOC_001745	SDC3	chr1:31342312-31381480	KO	Rescue	OK	8.55175	5.32513	-0.683403	-4.16821	5e-05	0.00179837	yes	4.16821
TCONS_00039092	XLOC_015656	LOC100288911	chr2:36581891-36582713	KO	Rescue	OK	6.48475	2.93455	-1.14391	-4.16714	5e-05	0.00179837	yes	4.16714
TCONS_00028382	XLOC_011371	C1QTNF1	chr17:77015210-77045936	KO	Rescue	OK	1.97465	0.805713	-1.29326	-4.16294	5e-05	0.00179837	yes	4.16294
TCONS_00071481	XLOC_029167	PJA1	chrX:68380580-68385365	KO	Rescue	OK	3.13199	1.10746	-1.49982	-4.15726	5e-05	0.00179837	yes	4.15726
TCONS_00040818	XLOC_016383	ARL4C	chr2:235401685-235405693	KO	Rescue	OK	0.245848	0.0442511	-2.47398	-4.1473	5e-05	0.00179837	yes	4.1473
TCONS_00040181	XLOC_016109	-	chr2:165504017-165522407	KO	Rescue	OK	0.162819	0.406624	1.32042	4.14397	5e-05	0.00179837	yes	4.14397
TCONS_00053652	XLOC_021509	BRD9	chr5:863849-892939	KO	Rescue	OK	16.7109	29.3102	0.810615	4.14318	5e-05	0.00179837	yes	4.14318
TCONS_00000421	XLOC_000176	-	chr1:16509646-16511708	KO	Rescue	OK	0.46834	0.0730926	-2.67976	-4.14189	5e-05	0.00179837	yes	4.14189
TCONS_00064169	XLOC_026139	SLC7A2	chr8:17354518-17428077	KO	Rescue	OK	1.46678	4.04178	1.46234	4.1368	5e-05	0.00179837	yes	4.1368
TCONS_00010699	XLOC_004248	GYLTL1B	chr11:45943195-45950647	KO	Rescue	OK	0.511309	1.48452	1.53773	4.11801	5e-05	0.00179837	yes	4.11801
TCONS_00034868	XLOC_013939	-	chr19:12794486-12795853	KO	Rescue	OK	0.075347	0.668979	3.15034	4.10678	5e-05	0.00179837	yes	4.10678
TCONS_00055717	XLOC_022369	HSPA1B	chr6:31795511-31798031	KO	Rescue	OK	27.795	43.4263	0.643745	4.10062	5e-05	0.00179837	yes	4.10062
TCONS_00008001	XLOC_003210	IFIT2	chr10:91061705-91069033	KO	Rescue	OK	3.80595	2.18677	-0.799452	-4.09834	5e-05	0.00179837	yes	4.09834
TCONS_00042488	XLOC_017062	SDC4	chr20:43953928-43977064	KO	Rescue	OK	34.6989	22.1705	-0.646244	-4.09381	5e-05	0.00179837	yes	4.09381
TCONS_00005166	XLOC_002065	ARHGAP29	chr1:94632404-94713312	KO	Rescue	OK	2.30254	0.381284	-2.59429	-4.05942	5e-05	0.00179837	yes	4.05942
TCONS_00014009	XLOC_005583	TRIM29	chr11:119981991-120008863	KO	Rescue	OK	21.6647	8.48867	-1.35173	-4.04742	5e-05	0.00179837	yes	4.04742
TCONS_00027938	XLOC_011204	NOG	chr17:54671059-54672951	KO	Rescue	OK	7.61837	12.4776	0.711789	4.04186	5e-05	0.00179837	yes	4.04186
TCONS_00009455	XLOC_003734	ZCCHC24	chr10:81142082-81205383	KO	Rescue	OK	5.08004	3.12502	-0.700974	-4.03943	5e-05	0.00179837	yes	4.03943
TCONS_00065733	XLOC_026833	LACTB2	chr8:71520811-71581547	KO	Rescue	OK	16.2916	9.91985	-0.715736	-4.0391	5e-05	0.00179837	yes	4.0391
TCONS_00036994	XLOC_014828	UGP2	chr2:64068097-64118696	KO	Rescue	OK	38.0216	18.2613	-1.05803	-4.03254	5e-05	0.00179837	yes	4.03254
TCONS_00012278	XLOC_004875	H19	chr11:2016405-2019065	KO	Rescue	OK	0.422638	1.06733	1.33651	4.02853	5e-05	0.00179837	yes	4.02853
TCONS_00021949	XLOC_008839	GLCE	chr15:69116302-69564544	KO	Rescue	OK	8.37309	5.28349	-0.664267	-4.02656	5e-05	0.00179837	yes	4.02656
TCONS_00042438	XLOC_017039	MAFB	chr20:39314516-39317876	KO	Rescue	OK	0.284165	0.052265	-2.44281	-4.02419	5e-05	0.00179837	yes	4.02419
TCONS_00031004	XLOC_012399	RNF125	chr18:29598385-29653154	KO	Rescue	OK	1.04622	1.97231	0.914702	4.02354	5e-05	0.00179837	yes	4.02354
TCONS_00021822	XLOC_008789	FOXB1	chr15:60291562-60299692	KO	Rescue	OK	0.319495	0.838411	1.39186	4.01951	5e-05	0.00179837	yes	4.01951
TCONS_00027320	XLOC_010978	SLFN5	chr17:33570051-33600629	KO	Rescue	OK	4.54712	2.17412	-1.06452	-4.01411	5e-05	0.00179837	yes	4.01411
TCONS_00008538	XLOC_003417	DOCK1	chr10:128588082-129250780	KO	Rescue	OK	0.661446	2.62355	1.98783	4.00983	5e-05	0.00179837	yes	4.00983
TCONS_00034719	XLOC_013881	OLFM2	chr19:9964392-10047070	KO	Rescue	OK	1.22867	2.6479	1.10775	4.00941	5e-05	0.00179837	yes	4.00941
TCONS_00030890	XLOC_012351	SLMO1	chr18:12407885-12433079	KO	Rescue	OK	0.772954	0.170353	-2.18186	-4.00507	5e-05	0.00179837	yes	4.00507
TCONS_00015036	XLOC_005963	KRT7	chr12:52626337-52642709	KO	Rescue	OK	120.118	209.931	0.805465	3.99305	5e-05	0.00179837	yes	3.99305
TCONS_00064949	XLOC_026492	SQLE	chr8:126010719-126034525	KO	Rescue	OK	39.9043	25.8659	-0.625492	-3.99273	5e-05	0.00179837	yes	3.99273
TCONS_00006112	XLOC_002444	IGSF8	chr1:160061128-160068618	KO	Rescue	OK	13.4649	8.08336	-0.736179	-3.98534	5e-05	0.00179837	yes	3.98534
TCONS_00063300	XLOC_025748	ABCB1	chr7:87132342-87461613	KO	Rescue	OK	1.51417	0.441497	-1.77805	-3.98527	5e-05	0.00179837	yes	3.98527
TCONS_00071266	XLOC_029089	KCND1	chrX:48818638-48828251	KO	Rescue	OK	0.68895	0.314018	-1.13355	-3.97999	5e-05	0.00179837	yes	3.97999
TCONS_00069318	XLOC_028311	CLIC3	chr9:139889059-139891024	KO	Rescue	OK	3.10785	1.18817	-1.38718	-3.97563	5e-05	0.00179837	yes	3.97563
TCONS_00004278	XLOC_001719	FAM46B	chr1:27331510-27339333	KO	Rescue	OK	9.85111	6.07127	-0.698287	-3.97204	5e-05	0.00179837	yes	3.97204
TCONS_00056511	XLOC_022696	NCOA7	chr6:126102008-126253176	KO	Rescue	OK	15.0413	7.10357	-1.08231	-3.96853	5e-05	0.00179837	yes	3.96853
TCONS_00011415	XLOC_004525	GAL	chr11:68451982-68458643	KO	Rescue	OK	38.7392	61.0561	0.656341	3.96766	5e-05	0.00179837	yes	3.96766
TCONS_00027392	XLOC_011005	MLLT6	chr17:36861872-36886056	KO	Rescue	OK	17.3882	26.6059	0.613639	3.96522	5e-05	0.00179837	yes	3.96522
TCONS_00065459	XLOC_026716	DUSP4	chr8:29190578-29208267	KO	Rescue	OK	6.27849	3.95173	-0.667935	-3.96189	5e-05	0.00179837	yes	3.96189
TCONS_00008484	XLOC_003394	HTRA1	chr10:124221040-124274424	KO	Rescue	OK	28.6568	18.4528	-0.635038	-3.95448	5e-05	0.00179837	yes	3.95448
TCONS_00004679	XLOC_001867	-	chr1:44653464-44678247	KO	Rescue	OK	0.0565242	0.626196	3.46967	3.94392	0.0001	0.00333804	yes	3.94392
TCONS_00015999	XLOC_006354	EP400	chr12:132434287-132565169	KO	Rescue	OK	4.55646	9.29471	1.0285	3.9317	5e-05	0.00179837	yes	3.9317
TCONS_00044691	XLOC_017955	KLHDC7B	chr22:50983837-50989452	KO	Rescue	OK	1.18845	0.124822	-3.25113	-3.92304	5e-05	0.00179837	yes	3.92304
TCONS_00014671	XLOC_005832	-	chr12:20843461-20847704	KO	Rescue	OK	0.127566	0.377748	1.56618	3.92191	5e-05	0.00179837	yes	3.92191
TCONS_00005736	XLOC_002304	RORC	chr1:151778546-151804348	KO	Rescue	OK	1.52446	0.709173	-1.10409	-3.91563	5e-05	0.00179837	yes	3.91563
TCONS_00002291	XLOC_000953	ATP8B2	chr1:154298035-154323780	KO	Rescue	OK	1.23689	0.510949	-1.27547	-3.91246	5e-05	0.00179837	yes	3.91246
TCONS_00013197	XLOC_005259	ATG2A	chr11:64662003-64684894	KO	Rescue	OK	2.36593	0.672467	-1.81487	-3.91014	5e-05	0.00179837	yes	3.91014
TCONS_00036237	XLOC_014505	LILRA6	chr19:54720146-54746724	KO	Rescue	OK	0.631871	0.127285	-2.31157	-3.90675	5e-05	0.00179837	yes	3.90675
TCONS_00056786	XLOC_022826	SYNJ2	chr6:158402851-158520379	KO	Rescue	OK	1.68092	3.54636	1.07708	3.90551	5e-05	0.00179837	yes	3.90551
TCONS_00013548	XLOC_005414	RSF1	chr11:77371005-77532060	KO	Rescue	OK	4.37041	8.75338	1.00207	3.90504	5e-05	0.00179837	yes	3.90504
TCONS_00034450	XLOC_013769	MATK	chr19:3777966-3801810	KO	Rescue	OK	18.7054	30.2008	0.691136	3.90277	5e-05	0.00179837	yes	3.90277
TCONS_00023630	XLOC_009532	WFIKKN1	chr16:679815-684154	KO	Rescue	OK	1.0073	0.417535	-1.27053	-3.89522	5e-05	0.00179837	yes	3.89522
TCONS_00042484	XLOC_017060	SLPI	chr20:43880878-43883206	KO	Rescue	OK	83.1482	53.1461	-0.645723	-3.89277	5e-05	0.00179837	yes	3.89277
TCONS_00064827	XLOC_026421	-	chr8:101348202-101364133	KO	Rescue	OK	0.922097	0.435996	-1.0806	-3.89197	5e-05	0.00179837	yes	3.89197
TCONS_00067381	XLOC_027495	GSN	chr9:124030140-124095120	KO	Rescue	OK	2.01006	0.663795	-1.59843	-3.88772	5e-05	0.00179837	yes	3.88772
TCONS_00051409	XLOC_020608	PPM1K	chr4:89178760-89205983	KO	Rescue	OK	1.30443	0.60979	-1.09703	-3.88529	5e-05	0.00179837	yes	3.88529
TCONS_00000845	XLOC_000337	GJB5	chr1:35220647-35224113	KO	Rescue	OK	0.774713	0.163166	-2.24732	-3.87979	5e-05	0.00179837	yes	3.87979
TCONS_00037612	XLOC_015092	MYO7B	chr2:128293377-128395303	KO	Rescue	OK	0.433944	0.110034	-1.97956	-3.87905	5e-05	0.00179837	yes	3.87905
TCONS_00006440	XLOC_002590	FAM5C	chr1:190066796-190450482	KO	Rescue	OK	0.199842	1.43341	2.84252	3.86785	5e-05	0.00179837	yes	3.86785
TCONS_00057447	XLOC_023086	ZBTB12	chr6:31865561-31913449	KO	Rescue	OK	6.75455	11.1216	0.719429	3.86625	5e-05	0.00179837	yes	3.86625
TCONS_00023367	XLOC_009415	MEX3B	chr15:82334118-82338484	KO	Rescue	OK	3.87475	2.32294	-0.738152	-3.86576	5e-05	0.00179837	yes	3.86576
TCONS_00067691	XLOC_027601	LAMC3	chr9:133884359-133968446	KO	Rescue	OK	4.32459	7.04562	0.704164	3.86248	5e-05	0.00179837	yes	3.86248
TCONS_00061889	XLOC_025150	PCOLCE	chr7:100183955-100205798	KO	Rescue	OK	12.4448	19.624	0.657079	3.86143	5e-05	0.00179837	yes	3.86143
TCONS_00000697	XLOC_000285	SESN2	chr1:28585962-28609002	KO	Rescue	OK	3.33735	5.40303	0.695065	3.85462	5e-05	0.00179837	yes	3.85462
TCONS_00056154	XLOC_022537	FAM83B	chr6:54711568-54809897	KO	Rescue	OK	0.00799622	0.201406	4.65465	3.85289	0.0026	0.0469108	yes	3.85289
TCONS_00007958	XLOC_003188	ADIRF	chr10:88725117-88769960	KO	Rescue	OK	14.1767	4.6485	-1.60868	-3.85056	5e-05	0.00179837	yes	3.85056
TCONS_00061192	XLOC_024873	INMT	chr7:30791750-30932002	KO	Rescue	OK	2.08096	0.756408	-1.46001	-3.83644	5e-05	0.00179837	yes	3.83644
TCONS_00007463	XLOC_002983	-	chr10:38354668-38357037	KO	Rescue	OK	0.412373	0.987715	1.26014	3.82792	5e-05	0.00179837	yes	3.82792
TCONS_00021109	XLOC_008460	SYNE3	chr14:95881635-95983009	KO	Rescue	OK	0.717262	0.206883	-1.79369	-3.82776	5e-05	0.00179837	yes	3.82776
TCONS_00012454	XLOC_004961	NLRP10	chr11:7979228-7985178	KO	Rescue	OK	0.317255	0.0822598	-1.94738	-3.82642	5e-05	0.00179837	yes	3.82642
TCONS_00024857	XLOC_009949	TANGO6	chr16:68877438-69121509	KO	Rescue	OK	4.11924	6.93939	0.752429	3.82077	5e-05	0.00179837	yes	3.82077
TCONS_00056216	XLOC_022563	RIMS1	chr6:72596405-73112849	KO	Rescue	OK	4.56056	10.0678	1.14246	3.82065	5e-05	0.00179837	yes	3.82065
TCONS_00040110	XLOC_016085	RPRM	chr2:154333851-154335322	KO	Rescue	OK	0.14413	0.665505	2.20708	3.81947	5e-05	0.00179837	yes	3.81947
TCONS_00004358	XLOC_001752	FABP3	chr1:31769822-31845923	KO	Rescue	OK	12.4552	2.23193	-2.48039	-3.81871	5e-05	0.00179837	yes	3.81871
TCONS_00070461	XLOC_028777	PGRMC1	chrX:118370210-118378429	KO	Rescue	OK	128.606	85.4143	-0.590404	-3.81716	5e-05	0.00179837	yes	3.81716
TCONS_00002531	XLOC_001038	SLAMF7	chr1:160709076-160724601	KO	Rescue	OK	0.297937	0.0504764	-2.56133	-3.81652	5e-05	0.00179837	yes	3.81652
TCONS_00061923	XLOC_025162	SERPINE1	chr7:100769909-100782547	KO	Rescue	OK	2.71708	0.796399	-1.77049	-3.81581	5e-05	0.00179837	yes	3.81581
TCONS_00018005	XLOC_007145	NHLRC3	chr13:39612434-39624244	KO	Rescue	OK	1.42252	3.47424	1.28825	3.8127	5e-05	0.00179837	yes	3.8127
TCONS_00020769	XLOC_008345	PLEK2	chr14:67853699-67878828	KO	Rescue	OK	4.74138	2.34835	-1.01366	-3.81235	5e-05	0.00179837	yes	3.81235
TCONS_00026051	XLOC_010462	CNOT1	chr16:58549382-58663795	KO	Rescue	OK	2.75114	14.8039	2.42788	3.81232	5e-05	0.00179837	yes	3.81232
TCONS_00013880	XLOC_005532	IL18	chr11:112013973-112034840	KO	Rescue	OK	65.155	41.0754	-0.665603	-3.81009	5e-05	0.00179837	yes	3.81009
TCONS_00011337	XLOC_004504	C11orf86	chr11:66742574-66744482	KO	Rescue	OK	8.24651	2.49858	-1.72268	-3.80541	5e-05	0.00179837	yes	3.80541
TCONS_00015259	XLOC_006044	INHBE	chr12:57849095-57851791	KO	Rescue	OK	0.635163	1.34822	1.08586	3.80386	5e-05	0.00179837	yes	3.80386
TCONS_00065375	XLOC_026678	PHYHIP	chr8:22077215-22089851	KO	Rescue	OK	2.42861	0.936736	-1.37442	-3.80224	5e-05	0.00179837	yes	3.80224
TCONS_00045371	XLOC_018220	-	chr22:42760419-42765301	KO	Rescue	OK	8.4649	4.00929	-1.07815	-3.79836	5e-05	0.00179837	yes	3.79836
TCONS_00037043	XLOC_014851	MXD1	chr2:70142172-70170076	KO	Rescue	OK	2.77658	1.68399	-0.721423	-3.79162	5e-05	0.00179837	yes	3.79162
TCONS_00054125	XLOC_021735	ZBED3	chr5:76369270-76444340	KO	Rescue	OK	7.37601	11.2685	0.611384	3.78451	5e-05	0.00179837	yes	3.78451
TCONS_00010391	XLOC_004116	SWAP70	chr11:9685627-9774507	KO	Rescue	OK	12.3664	18.6774	0.594867	3.77973	5e-05	0.00179837	yes	3.77973
TCONS_00052173	XLOC_020918	FAM105A	chr5:14581890-14616287	KO	Rescue	OK	0.28699	0.569956	0.98985	3.77833	5e-05	0.00179837	yes	3.77833
TCONS_00010615	XLOC_004217	FJX1	chr11:35639734-35642421	KO	Rescue	OK	2.00934	3.45723	0.782893	3.77744	5e-05	0.00179837	yes	3.77744
TCONS_00041360	XLOC_016614	ACSS2	chr20:33462765-33515769	KO	Rescue	OK	8.85068	5.63734	-0.650773	-3.77307	5e-05	0.00179837	yes	3.77307
TCONS_00015414	XLOC_006108	-	chr12:72188621-72194575	KO	Rescue	OK	0.504438	0.234395	-1.10573	-3.76771	5e-05	0.00179837	yes	3.76771
TCONS_00011719	XLOC_004652	FUT4	chr11:94277016-94283064	KO	Rescue	OK	0.312471	0.123369	-1.34074	-3.76622	5e-05	0.00179837	yes	3.76622
TCONS_00040669	XLOC_016314	CHPF	chr2:220403668-220408487	KO	Rescue	OK	23.5925	15.532	-0.603081	-3.76418	5e-05	0.00179837	yes	3.76418
TCONS_00008478	XLOC_003389	PLEKHA1	chr10:124134045-124194045	KO	Rescue	OK	3.08391	0.407721	-2.91911	-3.76413	5e-05	0.00179837	yes	3.76413
TCONS_00058453	XLOC_023483	CITED2	chr6:139693391-139695787	KO	Rescue	OK	86.0836	57.3422	-0.586141	-3.75583	5e-05	0.00179837	yes	3.75583
TCONS_00016281	XLOC_006456	OLR1	chr12:10310898-10324790	KO	Rescue	OK	88.3654	57.9072	-0.609739	-3.75153	5e-05	0.00179837	yes	3.75153
TCONS_00006578	XLOC_002648	PLEKHA6	chr1:204187978-204329057	KO	Rescue	OK	0.628085	0.23073	-1.44475	-3.74148	5e-05	0.00179837	yes	3.74148
TCONS_00029795	XLOC_011914	-	chr17:42299053-42300150	KO	Rescue	OK	4.428	1.16015	-1.93234	-3.74043	5e-05	0.00179837	yes	3.74043
TCONS_00011605	XLOC_004598	CAPN5	chr11:76777991-76837198	KO	Rescue	OK	0.23986	0.06266	-1.93657	-3.7387	5e-05	0.00179837	yes	3.7387
TCONS_00053935	XLOC_021648	CCL28	chr5:43379043-43412502	KO	Rescue	OK	0.320534	0.0763201	-2.07034	-3.73558	5e-05	0.00179837	yes	3.73558
TCONS_00058306	XLOC_023426	MAN1A1	chr6:119498365-119670931	KO	Rescue	OK	0.037792	0.740985	4.29329	3.73557	0.00095	0.0216666	yes	3.73557
TCONS_00000056	XLOC_000017	AGRN	chr1:955436-991499	KO	Rescue	OK	6.97694	0.475779	-3.87423	-3.73391	5e-05	0.00179837	yes	3.73391
TCONS_00013667	XLOC_005445	FZD4	chr11:86650167-86666443	KO	Rescue	OK	1.13039	2.15722	0.932356	3.72879	5e-05	0.00179837	yes	3.72879
TCONS_00042318	XLOC_017001	-	chr20:33811099-33813490	KO	Rescue	OK	0.438656	0.114867	-1.93312	-3.71805	5e-05	0.00179837	yes	3.71805
TCONS_00012693	XLOC_005054	BDNF	chr11:27528398-27743605	KO	Rescue	OK	0.79431	1.82234	1.19802	3.71685	5e-05	0.00179837	yes	3.71685
TCONS_00048540	XLOC_019432	CCDC80	chr3:112323408-112360129	KO	Rescue	OK	2.93662	1.59342	-0.882031	-3.71562	5e-05	0.00179837	yes	3.71562
TCONS_00046687	XLOC_018695	PHLDB2	chr3:111393503-111695364	KO	Rescue	OK	10.569	3.82496	-1.46632	-3.71549	5e-05	0.00179837	yes	3.71549
TCONS_00000803	XLOC_000317	FAM167B	chr1:32712817-32714461	KO	Rescue	OK	1.49562	0.461225	-1.69721	-3.71228	5e-05	0.00179837	yes	3.71228
TCONS_00015771	XLOC_006272	RNFT2	chr12:117176095-117291436	KO	Rescue	OK	0.385218	1.34604	1.80497	3.71211	5e-05	0.00179837	yes	3.71211
TCONS_00063779	XLOC_025948	PODXL	chr7:131185020-131241376	KO	Rescue	OK	23.418	36.3344	0.633716	3.71021	5e-05	0.00179837	yes	3.71021
TCONS_00013688	XLOC_005458	CHORDC1	chr11:89933596-89956532	KO	Rescue	OK	30.9036	46.0985	0.576944	3.7087	5e-05	0.00179837	yes	3.7087
TCONS_00036049	XLOC_014431	-	chr19:51276385-51279728	KO	Rescue	OK	0.289356	0.069356	-2.06075	-3.7023	5e-05	0.00179837	yes	3.7023
TCONS_00004672	XLOC_001863	SLC6A9	chr1:44457279-44497256	KO	Rescue	OK	7.71588	13.6276	0.820627	3.70006	5e-05	0.00179837	yes	3.70006
TCONS_00018985	XLOC_007570	NALCN	chr13:101360578-102069562	KO	Rescue	OK	1.57862	0.603878	-1.38634	-3.69903	5e-05	0.00179837	yes	3.69903
TCONS_00055993	XLOC_022472	CNPY3	chr6:42896029-42911600	KO	Rescue	OK	6.95375	1.57726	-2.14038	-3.69111	5e-05	0.00179837	yes	3.69111
TCONS_00069326	XLOC_028315	ENTPD2	chr9:139942550-139948561	KO	Rescue	OK	3.81173	1.85905	-1.03588	-3.68566	5e-05	0.00179837	yes	3.68566
TCONS_00065282	XLOC_026640	CTSB	chr8:11660075-11725646	KO	Rescue	OK	57.4791	32.3821	-0.827841	-3.68229	5e-05	0.00179837	yes	3.68229
TCONS_00012510	XLOC_004976	TMEM41B	chr11:9302200-9336315	KO	Rescue	OK	9.92147	15.0815	0.604152	3.67608	5e-05	0.00179837	yes	3.67608
TCONS_00071450	XLOC_029154	AMER1	chrX:63404995-63425624	KO	Rescue	OK	2.5871	4.25859	0.71904	3.666	5e-05	0.00179837	yes	3.666
TCONS_00058639	XLOC_023568	-	chr6:166215010-166222177	KO	Rescue	OK	0.274871	0.53758	0.967725	3.66597	5e-05	0.00179837	yes	3.66597
TCONS_00054638	XLOC_021935	PCDH1	chr5:141232672-141257944	KO	Rescue	OK	0.526223	0.216285	-1.28274	-3.66022	5e-05	0.00179837	yes	3.66022
TCONS_00029209	XLOC_011675	ALDOC	chr17:26900132-26903951	KO	Rescue	OK	12.2008	7.1984	-0.761231	-3.64473	5e-05	0.00179837	yes	3.64473
TCONS_00011348	XLOC_004506	RHOD	chr11:66824145-66839697	KO	Rescue	OK	25.0652	16.132	-0.63576	-3.64137	5e-05	0.00179837	yes	3.64137
TCONS_00010848	XLOC_004314	SERPING1	chr11:57365026-57382326	KO	Rescue	OK	3.18843	1.46831	-1.11869	-3.63998	5e-05	0.00179837	yes	3.63998
TCONS_00007976	XLOC_003198	PAPSS2	chr10:89417981-89507471	KO	Rescue	OK	62.4696	41.8433	-0.578158	-3.6388	5e-05	0.00179837	yes	3.6388
TCONS_00056783	XLOC_022826	SYNJ2	chr6:158402851-158520379	KO	Rescue	OK	2.18213	0.131239	-4.05547	-3.63447	0.00015	0.00477533	yes	3.63447
TCONS_00066157	XLOC_026998	-	chr8:128123023-128241813	KO	Rescue	OK	27.0543	51.3642	0.924906	3.63434	5e-05	0.00179837	yes	3.63434
TCONS_00069149	XLOC_028241	FIBCD1	chr9:133777824-133814689	KO	Rescue	OK	6.79567	2.39742	-1.50314	-3.63414	5e-05	0.00179837	yes	3.63414
TCONS_00034407	XLOC_013748	GNG7	chr19:2511217-2702746	KO	Rescue	OK	0.478753	0.201242	-1.25035	-3.63243	5e-05	0.00179837	yes	3.63243
TCONS_00012736	XLOC_005067	CSTF3	chr11:33106129-33183058	KO	Rescue	OK	24.4318	15.2628	-0.678736	-3.63154	5e-05	0.00179837	yes	3.63154
TCONS_00029594	XLOC_011845	KRT17	chr17:39775688-39781015	KO	Rescue	OK	31.851	12.6683	-1.33012	-3.62776	5e-05	0.00179837	yes	3.62776
TCONS_00066111	XLOC_026988	KLHL38	chr8:124656647-124665190	KO	Rescue	OK	0.258279	0.0419279	-2.62294	-3.62705	5e-05	0.00179837	yes	3.62705
TCONS_00065032	XLOC_026525	PSCA	chr8:143751725-143764145	KO	Rescue	OK	2.66972	0.611456	-2.12637	-3.62459	5e-05	0.00179837	yes	3.62459
TCONS_00013435	XLOC_005365	PDE2A	chr11:72287183-72385497	KO	Rescue	OK	19.4902	36.6267	0.910148	3.62345	5e-05	0.00179837	yes	3.62345
TCONS_00048943	XLOC_019578	-	chr3:145766205-145772320	KO	Rescue	OK	0.333107	0.141092	-1.23935	-3.6194	5e-05	0.00179837	yes	3.6194
TCONS_00014687	XLOC_005840	C12orf39	chr12:21679127-21685615	KO	Rescue	OK	0.498624	0.0282987	-4.13914	-3.61721	0.00055	0.0141432	yes	3.61721
TCONS_00053738	XLOC_021559	FAM134B	chr5:16473146-16617167	KO	Rescue	OK	0.714734	0.178538	-2.00118	-3.61382	5e-05	0.00179837	yes	3.61382
TCONS_00052089	XLOC_020877	CEP72	chr5:612404-693510	KO	Rescue	OK	2.60492	7.23617	1.47399	3.61018	5e-05	0.00179837	yes	3.61018
TCONS_00039161	XLOC_015688	-	chr2:42158748-42161765	KO	Rescue	OK	4.9996	1.23372	-2.0188	-3.60764	5e-05	0.00179837	yes	3.60764
TCONS_00066512	XLOC_027151	SLC1A1	chr9:4490426-4587469	KO	Rescue	OK	1.2489	0.507492	-1.2992	-3.60544	5e-05	0.00179837	yes	3.60544
TCONS_00056452	XLOC_022672	RWDD1	chr6:116892340-116954148	KO	Rescue	OK	27.0067	45.4819	0.751973	3.60466	5e-05	0.00179837	yes	3.60466
TCONS_00020915	XLOC_008401	IRF2BPL	chr14:77490885-77495042	KO	Rescue	OK	17.1628	11.5452	-0.571986	-3.60173	5e-05	0.00179837	yes	3.60173
TCONS_00037020	XLOC_014841	APLF	chr2:68694690-68807294	KO	Rescue	OK	0.363547	0.089969	-2.01464	-3.60158	5e-05	0.00179837	yes	3.60158
TCONS_00018357	XLOC_007298	-	chr13:109917437-109923539	KO	Rescue	OK	9.31971	6.2394	-0.578878	-3.59169	5e-05	0.00179837	yes	3.59169
TCONS_00026503	XLOC_010641	MVD	chr16:88718345-88729553	KO	Rescue	OK	23.1358	14.7799	-0.646493	-3.59087	5e-05	0.00179837	yes	3.59087
TCONS_00056143	XLOC_022528	-	chr6:52860430-52860719	KO	Rescue	OK	15.6322	30.3655	0.957912	3.58691	5e-05	0.00179837	yes	3.58691
TCONS_00032618	XLOC_013030	FCHO1	chr19:17858526-17899377	KO	Rescue	OK	1.78116	3.29048	0.885482	3.58532	5e-05	0.00179837	yes	3.58532
TCONS_00062967	XLOC_025593	-	chr7:44591630-44593616	KO	Rescue	OK	0.437698	0.0349289	-3.64744	-3.58472	0.00035	0.00974863	yes	3.58472
TCONS_00037584	XLOC_015081	INHBB	chr2:121103718-121109383	KO	Rescue	OK	0.228269	0.0382431	-2.57746	-3.58019	5e-05	0.00179837	yes	3.58019
TCONS_00057669	XLOC_023161	BTBD9	chr6:38136226-38607924	KO	Rescue	OK	0.456111	0.178676	-1.35204	-3.57807	5e-05	0.00179837	yes	3.57807
TCONS_00004901	XLOC_001950	JUN	chr1:59246462-59249785	KO	Rescue	OK	3.11199	1.89053	-0.719048	-3.57682	5e-05	0.00179837	yes	3.57682
TCONS_00032506	XLOC_012976	IL27RA	chr19:14142551-14163717	KO	Rescue	OK	6.55725	10.0483	0.615795	3.57565	5e-05	0.00179837	yes	3.57565
TCONS_00021220	XLOC_008503	AHNAK2	chr14:105403590-105444697	KO	Rescue	OK	2.35555	0.826749	-1.51054	-3.56081	5e-05	0.00179837	yes	3.56081
TCONS_00021542	XLOC_008691	CHAC1	chr15:41245635-41248717	KO	Rescue	OK	1.81191	3.33551	0.880397	3.55947	5e-05	0.00179837	yes	3.55947
TCONS_00032514	XLOC_012980	PKN1	chr19:14544136-14582679	KO	Rescue	OK	0.865397	4.16611	2.26727	3.55755	5e-05	0.00179837	yes	3.55755
TCONS_00001739	XLOC_000694	-	chr1:109642802-109749403	KO	Rescue	OK	3.0363	0.237506	-3.67628	-3.55727	5e-05	0.00179837	yes	3.55727
TCONS_00040598	XLOC_016280	IGFBP5	chr2:217536827-217560272	KO	Rescue	OK	0.237202	0.0882488	-1.42647	-3.55645	5e-05	0.00179837	yes	3.55645
TCONS_00014420	XLOC_005719	C1S	chr12:7167979-7178335	KO	Rescue	OK	5.74537	2.52844	-1.18415	-3.55102	5e-05	0.00179837	yes	3.55102
TCONS_00011710	XLOC_004646	MED17	chr11:93517404-93546496	KO	Rescue	OK	17.1275	25.2319	0.558937	3.54743	5e-05	0.00179837	yes	3.54743
TCONS_00048603	XLOC_019453	ARHGAP31	chr3:119013219-119138662	KO	Rescue	OK	0.592213	0.0856657	-2.78933	-3.54734	5e-05	0.00179837	yes	3.54734
TCONS_00043908	XLOC_017636	DGCR6	chr22:18893735-18899601	KO	Rescue	OK	3.94725	2.12225	-0.895253	-3.53623	5e-05	0.00179837	yes	3.53623
TCONS_00022982	XLOC_009273	RPS27L	chr15:63445538-63449741	KO	Rescue	OK	64.8122	43.7739	-0.566195	-3.53482	5e-05	0.00179837	yes	3.53482
TCONS_00043691	XLOC_017547	TMPRSS3	chr21:43791971-43816955	KO	Rescue	OK	2.89567	0.997273	-1.53784	-3.53402	5e-05	0.00179837	yes	3.53402
TCONS_00004885	XLOC_001943	PPAP2B	chr1:56960418-57045257	KO	Rescue	OK	3.58939	2.22549	-0.689615	-3.53263	5e-05	0.00179837	yes	3.53263
TCONS_00022958	XLOC_009265	-	chr15:60287847-60291463	KO	Rescue	OK	0.0787461	0.274662	1.80238	3.53209	5e-05	0.00179837	yes	3.53209
TCONS_00010617	XLOC_004218	TRIM44	chr11:35683967-35839619	KO	Rescue	OK	24.745	40.8681	0.723839	3.53067	5e-05	0.00179837	yes	3.53067
TCONS_00023473	XLOC_009465	C15orf38	chr15:90373781-90456232	KO	Rescue	OK	3.04009	6.30741	1.05293	3.52882	5e-05	0.00179837	yes	3.52882
TCONS_00001515	XLOC_000600	CYR61	chr1:86046443-86049648	KO	Rescue	OK	63.2077	42.9847	-0.556277	-3.5278	5e-05	0.00179837	yes	3.5278
TCONS_00003489	XLOC_001416	SLC35F3	chr1:234040246-234460317	KO	Rescue	OK	2.02637	1.02183	-0.987742	-3.5268	5e-05	0.00179837	yes	3.5268
TCONS_00055267	XLOC_022200	CD83	chr6:14117486-14137148	KO	Rescue	OK	11.5074	5.93655	-0.954872	-3.52211	5e-05	0.00179837	yes	3.52211
TCONS_00042402	XLOC_017022	-	chr20:36127784-36140646	KO	Rescue	OK	0.595106	0.325703	-0.869591	-3.52108	5e-05	0.00179837	yes	3.52108
TCONS_00050231	XLOC_020123	PDLIM5	chr4:95373007-95589600	KO	Rescue	OK	26.0477	17.6922	-0.558042	-3.51816	5e-05	0.00179837	yes	3.51816
TCONS_00035750	XLOC_014301	RTN2	chr19:45988545-46000313	KO	Rescue	OK	6.55861	3.10537	-1.07862	-3.51687	5e-05	0.00179837	yes	3.51687
TCONS_00026712	XLOC_010740	BCL6B	chr17:6926368-6933848	KO	Rescue	OK	3.44725	5.83515	0.759322	3.5156	5e-05	0.00179837	yes	3.5156
TCONS_00046690	XLOC_018695	PHLDB2	chr3:111393503-111695364	KO	Rescue	OK	3.16395	0.294277	-3.42648	-3.51487	5e-05	0.00179837	yes	3.51487
TCONS_00036586	XLOC_014665	KLHL29	chr2:23607677-23931483	KO	Rescue	OK	4.52514	2.82915	-0.677596	-3.51419	5e-05	0.00179837	yes	3.51419
TCONS_00014669	XLOC_005830	PDE3A	chr12:20521195-20837041	KO	Rescue	OK	2.85065	10.4569	1.8751	3.50566	5e-05	0.00179837	yes	3.50566
TCONS_00055532	XLOC_022300	-	chr6:28340486-28342633	KO	Rescue	OK	0.48873	0.145672	-1.74631	-3.50426	5e-05	0.00179837	yes	3.50426
TCONS_00033916	XLOC_013560	LILRB3	chr19:54720146-54746724	KO	Rescue	OK	0.882714	0.097854	-3.17324	-3.50299	5e-05	0.00179837	yes	3.50299
TCONS_00007187	XLOC_002894	-	chr10:6779305-6782434	KO	Rescue	OK	0.620229	1.25322	1.01477	3.49486	5e-05	0.00179837	yes	3.49486
TCONS_00025136	XLOC_010070	CDH15	chr16:89238162-89261900	KO	Rescue	OK	0.232773	0.0310695	-2.90535	-3.49031	5e-05	0.00179837	yes	3.49031
TCONS_00055777	XLOC_022391	BRD2	chr6:32936285-32949282	KO	Rescue	OK	21.9774	6.87734	-1.6761	-3.48896	5e-05	0.00179837	yes	3.48896
TCONS_00012707	XLOC_005056	-	chr11:29320208-29357817	KO	Rescue	OK	2.76726	8.52258	1.62283	3.48711	5e-05	0.00179837	yes	3.48711
TCONS_00044672	XLOC_017946	PANX2	chr22:50608496-50618724	KO	Rescue	OK	0.940033	2.03724	1.11583	3.48693	5e-05	0.00179837	yes	3.48693
TCONS_00006312	XLOC_002525	TNFSF4	chr1:173152869-173176471	KO	Rescue	OK	0.309973	0.0968853	-1.67779	-3.48681	5e-05	0.00179837	yes	3.48681
TCONS_00045400	XLOC_018231	ARFGAP3	chr22:43192531-43253408	KO	Rescue	OK	10.7207	7.11755	-0.590948	-3.48074	5e-05	0.00179837	yes	3.48074
TCONS_00020211	XLOC_008106	CRIP2	chr14:105939274-105946507	KO	Rescue	OK	45.8115	29.3408	-0.642798	-3.48067	5e-05	0.00179837	yes	3.48067
TCONS_00037917	XLOC_015213	CYBRD1	chr2:172378756-172414643	KO	Rescue	OK	6.6604	4.18021	-0.672034	-3.47751	5e-05	0.00179837	yes	3.47751
TCONS_00049089	XLOC_019644	-	chr3:167383605-167394217	KO	Rescue	OK	0.719702	0.429869	-0.743503	-3.47679	5e-05	0.00179837	yes	3.47679
TCONS_00047445	XLOC_019013	IL1RAP	chr3:190231839-190374986	KO	Rescue	OK	4.53673	9.531	1.07097	3.47039	5e-05	0.00179837	yes	3.47039
TCONS_00064901	XLOC_026463	MAL2	chr8:120220609-120257914	KO	Rescue	OK	80.1482	55.2543	-0.536582	-3.4695	5e-05	0.00179837	yes	3.4695
TCONS_00022143	XLOC_008920	FAM108C1	chr15:80987651-81047962	KO	Rescue	OK	10.8914	7.19219	-0.598689	-3.46927	5e-05	0.00179837	yes	3.46927
TCONS_00018479	XLOC_007346	XPO4	chr13:21351467-21477162	KO	Rescue	OK	5.13454	8.07438	0.653115	3.46824	5e-05	0.00179837	yes	3.46824
TCONS_00006443	XLOC_002590	FAM5C	chr1:190066796-190450482	KO	Rescue	OK	0.338541	1.44741	2.09607	3.46145	5e-05	0.00179837	yes	3.46145
TCONS_00015039	XLOC_005966	-	chr12:52662972-52665932	KO	Rescue	OK	0.37567	0.120107	-1.64515	-3.46028	5e-05	0.00179837	yes	3.46028
TCONS_00058275	XLOC_023413	BET3L	chr6:116816183-116880031	KO	Rescue	OK	0.379327	0.0743344	-2.35134	-3.45877	5e-05	0.00179837	yes	3.45877
TCONS_00030232	XLOC_012101	PECAM1	chr17:62396776-62410044	KO	Rescue	OK	0.22115	0.0685477	-1.68984	-3.45762	5e-05	0.00179837	yes	3.45762
TCONS_00021781	XLOC_008774	TCF12	chr15:57178367-57581647	KO	Rescue	OK	10.5	16.4334	0.646244	3.45498	5e-05	0.00179837	yes	3.45498
TCONS_00016292	XLOC_006459	KLRC3	chr12:10515607-10590352	KO	Rescue	OK	2.39503	0.468046	-2.35532	-3.4547	5e-05	0.00179837	yes	3.4547
TCONS_00014637	XLOC_005811	PLEKHA5	chr12:19282586-19529333	KO	Rescue	OK	1.3303	2.83977	1.09402	3.454	5e-05	0.00179837	yes	3.454
TCONS_00027749	XLOC_011147	KPNB1	chr17:45726794-45762874	KO	Rescue	OK	162.324	249.59	0.620682	3.45394	5e-05	0.00179837	yes	3.45394
TCONS_00010967	XLOC_004360	CCDC86	chr11:60609428-60623444	KO	Rescue	OK	64.2617	93.2898	0.53776	3.4453	5e-05	0.00179837	yes	3.4453
TCONS_00025142	XLOC_010071	ZNF778	chr16:89284099-89304209	KO	Rescue	OK	3.96404	1.40014	-1.5014	-3.44359	5e-05	0.00179837	yes	3.44359
TCONS_00000158	XLOC_000066	ARHGEF16	chr1:3370983-3397695	KO	Rescue	OK	3.55271	6.13915	0.789121	3.44213	5e-05	0.00179837	yes	3.44213
TCONS_00002897	XLOC_001189	RGS2	chr1:192778168-192781407	KO	Rescue	OK	4.29779	7.06124	0.716329	3.43637	5e-05	0.00179837	yes	3.43637
TCONS_00052157	XLOC_020909	ANKRD33B	chr5:10563434-10658001	KO	Rescue	OK	6.02497	3.94984	-0.609159	-3.42728	5e-05	0.00179837	yes	3.42728
TCONS_00066530	XLOC_027162	JAK2	chr9:4984403-5129946	KO	Rescue	OK	2.31017	1.30859	-0.819985	-3.42669	5e-05	0.00179837	yes	3.42669
TCONS_00040983	XLOC_016452	SIRPA	chr20:1874812-1920540	KO	Rescue	OK	0.397725	0.0308338	-3.68919	-3.42283	0.0004	0.0109047	yes	3.42283
TCONS_00013285	XLOC_005297	SLC29A2	chr11:66129988-66139949	KO	Rescue	OK	10.0093	16.0781	0.683765	3.41594	5e-05	0.00179837	yes	3.41594
TCONS_00021910	XLOC_008826	SMAD3	chr15:67357478-67487570	KO	Rescue	OK	3.87115	1.29522	-1.57957	-3.4151	5e-05	0.00179837	yes	3.4151
TCONS_00058661	XLOC_023586	LINC00473	chr6:166319586-166403103	KO	Rescue	OK	13.9144	32.1921	1.21013	3.41456	5e-05	0.00179837	yes	3.41456
TCONS_00018834	XLOC_007497	PCDH9	chr13:66876965-67804468	KO	Rescue	OK	0.47159	0.128846	-1.87189	-3.41415	5e-05	0.00179837	yes	3.41415
TCONS_00010616	XLOC_004218	TRIM44	chr11:35683967-35839619	KO	Rescue	OK	5.72559	9.99855	0.804295	3.41271	5e-05	0.00179837	yes	3.41271
TCONS_00045172	XLOC_018144	IFT27	chr22:37154245-37172177	KO	Rescue	OK	2.54589	1.16382	-1.1293	-3.40944	5e-05	0.00179837	yes	3.40944
TCONS_00039410	XLOC_015793	TGFA	chr2:70674411-70781147	KO	Rescue	OK	1.11952	0.494802	-1.17796	-3.40911	5e-05	0.00179837	yes	3.40911
TCONS_00048955	XLOC_019580	PLSCR4	chr3:145910122-145968967	KO	Rescue	OK	2.57035	1.08869	-1.23937	-3.40652	5e-05	0.00179837	yes	3.40652
TCONS_00038465	XLOC_015418	INHA	chr2:220436953-220440435	KO	Rescue	OK	4.64456	2.71703	-0.77351	-3.40637	5e-05	0.00179837	yes	3.40637
TCONS_00020866	XLOC_008383	NPC2	chr14:74946642-74960084	KO	Rescue	OK	47.7939	32.3164	-0.564562	-3.40577	5e-05	0.00179837	yes	3.40577
TCONS_00003363	XLOC_001388	GJC2	chr1:228337414-228347527	KO	Rescue	OK	0.91573	0.418647	-1.12919	-3.40236	5e-05	0.00179837	yes	3.40236
TCONS_00050804	XLOC_020356	LOC100129917	chr4:770322-775642	KO	Rescue	OK	1.08523	0.435945	-1.31578	-3.39262	5e-05	0.00179837	yes	3.39262
TCONS_00035399	XLOC_014153	ZNF569	chr19:37902022-37958339	KO	Rescue	OK	0.319744	0.878646	1.45837	3.39221	5e-05	0.00179837	yes	3.39221
TCONS_00016912	XLOC_006703	ZNF385A	chr12:54762919-54785083	KO	Rescue	OK	8.29193	5.25814	-0.657157	-3.38958	5e-05	0.00179837	yes	3.38958
TCONS_00007979	XLOC_003200	PTEN	chr10:89618917-89731685	KO	Rescue	OK	5.09358	2.29496	-1.15021	-3.38778	5e-05	0.00179837	yes	3.38778
TCONS_00008454	XLOC_003387	TACC2	chr10:123748423-124014057	KO	Rescue	OK	4.64761	1.89745	-1.29242	-3.38319	5e-05	0.00179837	yes	3.38319
TCONS_00007647	XLOC_003071	BICC1	chr10:60272594-60591176	KO	Rescue	OK	0.0694078	1.36564	4.29834	3.37572	0.0016	0.03249	yes	3.37572
TCONS_00021780	XLOC_008774	TCF12	chr15:57178367-57581647	KO	Rescue	OK	0.912608	3.05257	1.74196	3.37287	5e-05	0.00179837	yes	3.37287
TCONS_00044398	XLOC_017822	LGALS1	chr22:38071612-38075809	KO	Rescue	OK	327.28	227.425	-0.525135	-3.36708	5e-05	0.00179837	yes	3.36708
TCONS_00063644	XLOC_025883	DOCK4	chr7:111366010-111846486	KO	Rescue	OK	1.33293	0.745933	-0.837486	-3.36681	5e-05	0.00179837	yes	3.36681
TCONS_00010407	XLOC_004123	LOC729013	chr11:10879763-10900823	KO	Rescue	OK	4.47823	2.20587	-1.02159	-3.36316	5e-05	0.00179837	yes	3.36316
TCONS_00001643	XLOC_000649	PALMD	chr1:100111157-100232184	KO	Rescue	OK	10.4544	5.67288	-0.881952	-3.36266	5e-05	0.00179837	yes	3.36266
TCONS_00045304	XLOC_018197	-	chr22:41581228-41582329	KO	Rescue	OK	2.19835	1.02506	-1.10072	-3.35928	5e-05	0.00179837	yes	3.35928
TCONS_00063144	XLOC_025675	-	chr7:66372137-66374650	KO	Rescue	OK	0.247507	0.0358617	-2.78696	-3.35877	0.0001	0.00333804	yes	3.35877
TCONS_00063260	XLOC_025724	SRCRB4D	chr7:76018645-76071388	KO	Rescue	OK	1.62558	0.662724	-1.29448	-3.35744	5e-05	0.00179837	yes	3.35744
TCONS_00070802	XLOC_028915	AVPR2	chrX:153167167-153172620	KO	Rescue	OK	0.640284	0.119798	-2.41811	-3.35585	0.0001	0.00333804	yes	3.35585
TCONS_00022313	XLOC_009006	SV2B	chr15:91643181-91844539	KO	Rescue	OK	0.137575	0.290276	1.07721	3.35111	5e-05	0.00179837	yes	3.35111
TCONS_00021694	XLOC_008740	SQRDL	chr15:45923345-45983492	KO	Rescue	OK	7.50726	3.45213	-1.1208	-3.34986	5e-05	0.00179837	yes	3.34986
TCONS_00046674	XLOC_018691	PVRL3	chr3:110790605-110913534	KO	Rescue	OK	0.0668452	0.22115	1.72613	3.33772	5e-05	0.00179837	yes	3.33772
TCONS_00036988	XLOC_014826	OTX1	chr2:63277191-63284966	KO	Rescue	OK	2.57516	4.43459	0.784136	3.33481	5e-05	0.00179837	yes	3.33481
TCONS_00036480	XLOC_014613	TRAPPC12	chr2:3383445-3483342	KO	Rescue	OK	1.02586	0.124079	-3.0475	-3.33323	0.00025	0.00734573	yes	3.33323
TCONS_00013527	XLOC_005402	GUCY2EP	chr11:76391209-76436987	KO	Rescue	OK	0.262941	0.518754	0.980313	3.33064	5e-05	0.00179837	yes	3.33064
TCONS_00003093	XLOC_001274	-	chr1:206921081-206924504	KO	Rescue	OK	0.241875	0.0136153	-4.15096	-3.33014	0.00265	0.0475015	yes	3.33014
TCONS_00062031	XLOC_025203	IFRD1	chr7:112063198-112117258	KO	Rescue	OK	14.8797	21.5781	0.536218	3.32971	5e-05	0.00179837	yes	3.32971
TCONS_00053654	XLOC_021510	LOC100506688	chr5:987334-997456	KO	Rescue	OK	0.530042	0.130664	-2.02024	-3.32212	5e-05	0.00179837	yes	3.32212
TCONS_00025523	XLOC_010201	TFAP4	chr16:4307186-4323001	KO	Rescue	OK	19.1736	27.7497	0.533351	3.31613	5e-05	0.00179837	yes	3.31613
TCONS_00050356	XLOC_020179	SNHG8	chr4:119199916-119200978	KO	Rescue	OK	104.775	47.4201	-1.14373	-3.31605	5e-05	0.00179837	yes	3.31605
TCONS_00005875	XLOC_002366	MUC1	chr1:155158299-155163173	KO	Rescue	OK	6.61658	2.49565	-1.40667	-3.31602	5e-05	0.00179837	yes	3.31602
TCONS_00055127	XLOC_022142	DUSP22	chr6:292030-351355	KO	Rescue	OK	2.64041	1.34015	-0.97837	-3.3128	5e-05	0.00179837	yes	3.3128
TCONS_00034869	XLOC_013940	-	chr19:12796643-12797617	KO	Rescue	OK	0.144437	0.764855	2.40475	3.31163	5e-05	0.00179837	yes	3.31163
TCONS_00058653	XLOC_023582	-	chr6:166276381-166303366	KO	Rescue	OK	0.239156	0.379175	0.664912	3.30633	5e-05	0.00179837	yes	3.30633
TCONS_00046259	XLOC_018532	SEMA3F	chr3:50192431-50226508	KO	Rescue	OK	19.5386	11.2223	-0.799957	-3.30619	5e-05	0.00179837	yes	3.30619
TCONS_00055776	XLOC_022391	BRD2	chr6:32936285-32949282	KO	Rescue	OK	1.80453	18.9158	3.3899	3.30333	0.00105	0.0235431	yes	3.30333
TCONS_00011170	XLOC_004437	ARL2	chr11:64781584-64808044	KO	Rescue	OK	32.3054	53.3817	0.72457	3.2943	5e-05	0.00179837	yes	3.2943
TCONS_00065731	XLOC_026832	TRAM1	chr8:71485452-71520694	KO	Rescue	OK	150.146	105.337	-0.511354	-3.29255	5e-05	0.00179837	yes	3.29255
TCONS_00002937	XLOC_001206	CRB1	chr1:197170591-197450610	KO	Rescue	OK	7.72944	4.70959	-0.714761	-3.29047	5e-05	0.00179837	yes	3.29047
TCONS_00053992	XLOC_021673	IL6ST	chr5:55230924-55290821	KO	Rescue	OK	29.6434	20.7195	-0.516727	-3.28829	5e-05	0.00179837	yes	3.28829
TCONS_00065647	XLOC_026791	PLAG1	chr8:57073467-57123888	KO	Rescue	OK	0.934704	0.301827	-1.63079	-3.28494	5e-05	0.00179837	yes	3.28494
TCONS_00032215	XLOC_012872	STXBP2	chr19:7701986-7712761	KO	Rescue	OK	18.1251	12.287	-0.56086	-3.28308	5e-05	0.00179837	yes	3.28308
TCONS_00055199	XLOC_022171	RIOK1	chr6:7326886-7418270	KO	Rescue	OK	25.2117	36.1775	0.520998	3.28146	5e-05	0.00179837	yes	3.28146
TCONS_00042285	XLOC_016983	PXMP4	chr20:32290549-32308136	KO	Rescue	OK	1.43842	0.874726	-0.71758	-3.28083	5e-05	0.00179837	yes	3.28083
TCONS_00012893	XLOC_005127	-	chr11:47926714-47927736	KO	Rescue	OK	1.0817	0.351836	-1.62033	-3.28	5e-05	0.00179837	yes	3.28
TCONS_00053448	XLOC_021413	NEURL1B	chr5:172068159-172118535	KO	Rescue	OK	2.01325	1.08914	-0.886336	-3.27611	5e-05	0.00179837	yes	3.27611
TCONS_00013022	XLOC_005205	FADS3	chr11:61640991-61659080	KO	Rescue	OK	3.73457	0.774395	-2.2698	-3.27578	5e-05	0.00179837	yes	3.27578
TCONS_00014431	XLOC_005720	CLSTN3	chr12:7247145-7311530	KO	Rescue	OK	6.00951	2.65956	-1.17606	-3.27375	5e-05	0.00179837	yes	3.27375
TCONS_00007993	XLOC_003208	FAS	chr10:90694830-90775542	KO	Rescue	OK	5.11249	3.22725	-0.66372	-3.26893	5e-05	0.00179837	yes	3.26893
TCONS_00025236	XLOC_010090	TCF25	chr16:89939292-89987385	KO	Rescue	OK	3.10755	1.1184	-1.47434	-3.26538	5e-05	0.00179837	yes	3.26538
TCONS_00066286	XLOC_027078	LY6D	chr8:143866297-143868008	KO	Rescue	OK	1.07304	0.264266	-2.02164	-3.26304	5e-05	0.00179837	yes	3.26304
TCONS_00049130	XLOC_019656	RPL22L1	chr3:170582664-170588297	KO	Rescue	OK	17.7653	11.0884	-0.680007	-3.26203	5e-05	0.00179837	yes	3.26203
TCONS_00023689	XLOC_009547	CACNA1H	chr16:1203127-1275254	KO	Rescue	OK	0.614468	0.0860247	-2.83652	-3.25676	0.0001	0.00333804	yes	3.25676
TCONS_00066676	XLOC_027210	ACO1	chr9:32384600-32526364	KO	Rescue	OK	21.074	14.1612	-0.573523	-3.2485	5e-05	0.00179837	yes	3.2485
TCONS_00002643	XLOC_001082	-	chr1:165890461-165893368	KO	Rescue	OK	0.27716	0.0758911	-1.86872	-3.24328	5e-05	0.00179837	yes	3.24328
TCONS_00017103	XLOC_006771	PPM1H	chr12:63037762-63328665	KO	Rescue	OK	9.69384	13.8094	0.510509	3.24325	5e-05	0.00179837	yes	3.24325
TCONS_00067039	XLOC_027364	S1PR3	chr9:91605777-91620069	KO	Rescue	OK	4.26448	2.83745	-0.587776	-3.24061	5e-05	0.00179837	yes	3.24061
TCONS_00068207	XLOC_027839	AQP3	chr9:33441151-33447631	KO	Rescue	OK	96.4273	68.1083	-0.50161	-3.23739	5e-05	0.00179837	yes	3.23739
TCONS_00001733	XLOC_000691	GPSM2	chr1:109419579-109506131	KO	Rescue	OK	5.64859	21.0007	1.89448	3.23668	0.0001	0.00333804	yes	3.23668
TCONS_00029791	XLOC_011913	UBTF	chr17:42282400-42299003	KO	Rescue	OK	10.2873	22.767	1.14608	3.23516	5e-05	0.00179837	yes	3.23516
TCONS_00054908	XLOC_022046	SH3PXD2B	chr5:171760502-171881527	KO	Rescue	OK	20.3279	14.3609	-0.501308	-3.2336	5e-05	0.00179837	yes	3.2336
TCONS_00048517	XLOC_019415	CD47	chr3:107761940-107809935	KO	Rescue	OK	4.237	1.89704	-1.15929	-3.23036	5e-05	0.00179837	yes	3.23036
TCONS_00058003	XLOC_023320	-	chr6:82362942-82367679	KO	Rescue	OK	0.113393	0.282216	1.31547	3.22853	5e-05	0.00179837	yes	3.22853
TCONS_00033830	XLOC_013499	ZNF331	chr19:54024176-54083523	KO	Rescue	OK	0.394076	1.25372	1.66967	3.22711	5e-05	0.00179837	yes	3.22711
TCONS_00031979	XLOC_012772	EFNA2	chr19:1286152-1301429	KO	Rescue	OK	1.98738	3.25652	0.712465	3.22686	5e-05	0.00179837	yes	3.22686
TCONS_00062751	XLOC_025517	SKAP2	chr7:26706687-26904341	KO	Rescue	OK	5.03858	3.38816	-0.572516	-3.22563	5e-05	0.00179837	yes	3.22563
TCONS_00058656	XLOC_023585	-	chr6:166312494-166315092	KO	Rescue	OK	1.02695	1.78322	0.79612	3.22532	5e-05	0.00179837	yes	3.22532
TCONS_00046805	XLOC_018753	KALRN	chr3:123813557-124440036	KO	Rescue	OK	0.903945	0.433177	-1.06128	-3.22523	5e-05	0.00179837	yes	3.22523
TCONS_00071896	XLOC_029348	-	chrX:130495542-130503015	KO	Rescue	OK	0.246304	0.0745299	-1.72455	-3.2219	5e-05	0.00179837	yes	3.2219
TCONS_00016792	XLOC_006653	KRT80	chr12:52562779-52585784	KO	Rescue	OK	19.8635	12.6569	-0.650203	-3.21975	5e-05	0.00179837	yes	3.21975
TCONS_00000723	XLOC_000291	RAB42	chr1:28918689-28923161	KO	Rescue	OK	13.4526	8.99789	-0.580232	-3.21942	5e-05	0.00179837	yes	3.21942
TCONS_00001089	XLOC_000428	DMAP1	chr1:44678969-44686375	KO	Rescue	OK	12.2114	24.8389	1.02437	3.21936	5e-05	0.00179837	yes	3.21936
TCONS_00006802	XLOC_002739	ENAH	chr1:225674533-225841061	KO	Rescue	OK	10.9723	18.463	0.75078	3.21633	5e-05	0.00179837	yes	3.21633
TCONS_00038985	XLOC_015605	DNMT3A	chr2:25451128-25565459	KO	Rescue	OK	0.152047	0.593718	1.96526	3.21247	5e-05	0.00179837	yes	3.21247
TCONS_00062969	XLOC_025595	-	chr7:44596272-44597599	KO	Rescue	OK	0.399539	0.0492952	-3.01882	-3.21201	0.0007	0.0170555	yes	3.21201
TCONS_00071587	XLOC_029215	BRWD3	chrX:79924986-80065233	KO	Rescue	OK	2.63364	3.77566	0.519673	3.21125	5e-05	0.00179837	yes	3.21125
TCONS_00023042	XLOC_009301	DPP8	chr15:65734799-65810067	KO	Rescue	OK	1.61753	4.48722	1.47203	3.21035	5e-05	0.00179837	yes	3.21035
TCONS_00034082	XLOC_013628	ZNF460	chr19:57791250-57819925	KO	Rescue	OK	2.86351	4.46516	0.640929	3.20872	5e-05	0.00179837	yes	3.20872
TCONS_00010605	XLOC_004215	-	chr11:35041616-35043149	KO	Rescue	OK	1.68955	2.96047	0.809184	3.20825	5e-05	0.00179837	yes	3.20825
TCONS_00051862	XLOC_020793	-	chr4:169967188-169995459	KO	Rescue	OK	0.552498	1.13025	1.0326	3.20521	5e-05	0.00179837	yes	3.20521
TCONS_00046440	XLOC_018590	FLNB	chr3:57994094-58158136	KO	Rescue	OK	8.52776	2.08584	-2.03154	-3.19524	5e-05	0.00179837	yes	3.19524
TCONS_00002886	XLOC_001182	PLA2G4A	chr1:186798031-186958113	KO	Rescue	OK	4.6932	6.95127	0.566703	3.19126	5e-05	0.00179837	yes	3.19126
TCONS_00056142	XLOC_022527	TMEM14A	chr6:52535883-52551385	KO	Rescue	OK	31.2678	21.4715	-0.542252	-3.18794	5e-05	0.00179837	yes	3.18794
TCONS_00017427	XLOC_006906	ALDH1L2	chr12:105413561-105478351	KO	Rescue	OK	2.51833	4.21201	0.74204	3.18249	5e-05	0.00179837	yes	3.18249
TCONS_00064621	XLOC_026320	C8orf46	chr8:67405490-67430759	KO	Rescue	OK	0.365449	0.123167	-1.56906	-3.18227	5e-05	0.00179837	yes	3.18227
TCONS_00062536	XLOC_025416	DNAJB6	chr7:157129709-157210133	KO	Rescue	OK	17.1322	28.8294	0.750829	3.18082	5e-05	0.00179837	yes	3.18082
TCONS_00004357	XLOC_001751	SNRNP40	chr1:31732414-31769644	KO	Rescue	OK	44.9628	63.5469	0.499091	3.17942	5e-05	0.00179837	yes	3.17942
TCONS_00039235	XLOC_015722	-	chr2:53467123-53732968	KO	Rescue	OK	0.0988048	0.684198	2.79176	3.17851	5e-05	0.00179837	yes	3.17851
TCONS_00000419	XLOC_000174	-	chr1:16485438-16492175	KO	Rescue	OK	0.0843138	0.26059	1.62794	3.1778	5e-05	0.00179837	yes	3.1778
TCONS_00064019	XLOC_026053	PAXIP1	chr7:154720226-154794682	KO	Rescue	OK	8.74985	12.5554	0.520977	3.17508	5e-05	0.00179837	yes	3.17508
TCONS_00019160	XLOC_007673	DHRS2	chr14:24105572-24114848	KO	Rescue	OK	2.68125	1.51744	-0.821264	-3.17285	5e-05	0.00179837	yes	3.17285
TCONS_00056451	XLOC_022672	RWDD1	chr6:116892340-116954148	KO	Rescue	OK	0.87252	11.0941	3.66846	3.17094	0.0015	0.0308992	yes	3.17094
TCONS_00022927	XLOC_009252	RFX7	chr15:56379497-56536597	KO	Rescue	OK	4.3299	6.41221	0.56649	3.17004	5e-05	0.00179837	yes	3.17004
TCONS_00046844	XLOC_018774	-	chr3:128234307-128235279	KO	Rescue	OK	0.878671	0.215469	-2.02784	-3.16373	0.0001	0.00333804	yes	3.16373
TCONS_00062397	XLOC_025368	LOC155060	chr7:148959109-148994403	KO	Rescue	OK	0.194595	0.681526	1.80829	3.16309	5e-05	0.00179837	yes	3.16309
TCONS_00017663	XLOC_007003	CAMKK2	chr12:121675375-121736111	KO	Rescue	OK	2.34705	0.312322	-2.90974	-3.15684	0.0005	0.0130935	yes	3.15684
TCONS_00001290	XLOC_000506	PRKAA2	chr1:57110989-57181008	KO	Rescue	OK	3.37398	5.12939	0.604335	3.15557	5e-05	0.00179837	yes	3.15557
TCONS_00030611	XLOC_012245	NPLOC4	chr17:79523910-79604181	KO	Rescue	OK	37.1746	54.2894	0.546351	3.15547	5e-05	0.00179837	yes	3.15547
TCONS_00001068	XLOC_000425	B4GALT2	chr1:44444671-44456843	KO	Rescue	OK	14.6842	25.3727	0.789017	3.15525	5e-05	0.00179837	yes	3.15525
TCONS_00063255	XLOC_025721	-	chr7:75700497-75704757	KO	Rescue	OK	0.284296	0.112467	-1.33789	-3.15357	5e-05	0.00179837	yes	3.15357
TCONS_00031842	XLOC_012713	DSEL	chr18:65173818-65566856	KO	Rescue	OK	4.56725	6.47973	0.504608	3.14813	5e-05	0.00179837	yes	3.14813
TCONS_00040415	XLOC_016205	SDPR	chr2:192699031-192712006	KO	Rescue	OK	0.295443	0.101424	-1.54248	-3.14025	5e-05	0.00179837	yes	3.14025
TCONS_00001782	XLOC_000706	GNAT2	chr1:110145888-110160988	KO	Rescue	OK	0.784941	0.395457	-0.989061	-3.13537	5e-05	0.00179837	yes	3.13537
TCONS_00011634	XLOC_004609	C11orf82	chr11:82612736-82645840	KO	Rescue	OK	5.03415	7.70544	0.61413	3.13533	5e-05	0.00179837	yes	3.13533
TCONS_00010585	XLOC_004201	NAT10	chr11:34126861-34172199	KO	Rescue	OK	31.2164	43.9121	0.492314	3.13505	5e-05	0.00179837	yes	3.13505
TCONS_00024584	XLOC_009862	MT2A	chr16:56642477-56643409	KO	Rescue	OK	310.323	219.601	-0.498888	-3.1319	5e-05	0.00179837	yes	3.1319
TCONS_00052359	XLOC_021004	ITGA1	chr5:52083606-52252348	KO	Rescue	OK	2.55109	0.755841	-1.75496	-3.12971	5e-05	0.00179837	yes	3.12971
TCONS_00036578	XLOC_014659	-	chr2:20650664-20674605	KO	Rescue	OK	0.930226	0.191909	-2.27716	-3.12648	5e-05	0.00179837	yes	3.12648
TCONS_00067297	XLOC_027464	HSDL2	chr9:115142188-115234685	KO	Rescue	OK	19.4477	29.0403	0.578458	3.12487	5e-05	0.00179837	yes	3.12487
TCONS_00042741	XLOC_017151	CABLES2	chr20:60963685-60982339	KO	Rescue	OK	2.01632	1.27204	-0.664573	-3.12247	5e-05	0.00179837	yes	3.12247
TCONS_00019052	XLOC_007612	-	chr13:114235835-114237947	KO	Rescue	OK	0.425446	0.135592	-1.64971	-3.12152	5e-05	0.00179837	yes	3.12152
TCONS_00033093	XLOC_013195	SIPA1L3	chr19:38397838-38699151	KO	Rescue	OK	2.22593	3.81395	0.776877	3.12119	5e-05	0.00179837	yes	3.12119
TCONS_00031909	XLOC_012744	FSTL3	chr19:676388-683392	KO	Rescue	OK	236.184	168.496	-0.487192	-3.12118	5e-05	0.00179837	yes	3.12118
TCONS_00043389	XLOC_017421	-	chr21:16193616-16197896	KO	Rescue	OK	0.339421	0.125417	-1.43634	-3.12108	0.0001	0.00333804	yes	3.12108
TCONS_00025243	XLOC_010091	TUBB3	chr16:89987575-90002507	KO	Rescue	OK	12.176	8.17071	-0.575508	-3.1201	5e-05	0.00179837	yes	3.1201
TCONS_00053280	XLOC_021342	SLC26A2	chr5:149340299-149366963	KO	Rescue	OK	10.2346	7.2785	-0.491748	-3.11825	5e-05	0.00179837	yes	3.11825
TCONS_00026019	XLOC_010448	PLLP	chr16:57287676-57318584	KO	Rescue	OK	21.9738	31.3353	0.512007	3.11634	5e-05	0.00179837	yes	3.11634
TCONS_00030534	XLOC_012217	-	chr17:77724081-77726495	KO	Rescue	OK	0.36072	0.767355	1.08901	3.11281	5e-05	0.00179837	yes	3.11281
TCONS_00056932	XLOC_022889	TUBB2A	chr6:3153901-3157783	KO	Rescue	OK	10.3402	6.94922	-0.573337	-3.11241	5e-05	0.00179837	yes	3.11241
TCONS_00012949	XLOC_005163	TIMM10	chr11:57295935-57298232	KO	Rescue	OK	60.0099	85.2422	0.506367	3.10852	5e-05	0.00179837	yes	3.10852
TCONS_00031451	XLOC_012564	PIEZO2	chr18:10669993-11149766	KO	Rescue	OK	25.9438	17.2261	-0.590797	-3.1081	5e-05	0.00179837	yes	3.1081
TCONS_00004765	XLOC_001896	PDZK1IP1	chr1:47649260-47655771	KO	Rescue	OK	1.4908	0.580449	-1.36084	-3.10495	5e-05	0.00179837	yes	3.10495
TCONS_00053925	XLOC_021642	OXCT1	chr5:41730166-41870791	KO	Rescue	OK	175.564	125.54	-0.483857	-3.09771	5e-05	0.00179837	yes	3.09771
TCONS_00049171	XLOC_019668	ZMAT3	chr3:178661766-178790093	KO	Rescue	OK	7.81619	3.99177	-0.969436	-3.09664	5e-05	0.00179837	yes	3.09664
TCONS_00048572	XLOC_019440	-	chr3:113428535-113431034	KO	Rescue	OK	0.236513	0.0532889	-2.15001	-3.09148	0.00015	0.00477533	yes	3.09148
TCONS_00039830	XLOC_015974	-	chr2:112002012-112005139	KO	Rescue	OK	0.906942	0.487386	-0.895944	-3.09022	5e-05	0.00179837	yes	3.09022
TCONS_00010125	XLOC_003997	IFITM2	chr11:308106-309410	KO	Rescue	OK	121.05	86.1749	-0.49026	-3.08893	5e-05	0.00179837	yes	3.08893
TCONS_00014428	XLOC_005720	CLSTN3	chr12:7247145-7311530	KO	Rescue	OK	2.44046	0.513484	-2.24876	-3.08824	0.00015	0.00477533	yes	3.08824
TCONS_00002295	XLOC_000954	IL6R	chr1:154377668-154441926	KO	Rescue	OK	1.72958	0.965351	-0.8413	-3.08492	5e-05	0.00179837	yes	3.08492
TCONS_00043694	XLOC_017547	TMPRSS3	chr21:43791971-43816955	KO	Rescue	OK	4.85956	2.07388	-1.22849	-3.08207	5e-05	0.00179837	yes	3.08207
TCONS_00037452	XLOC_015025	SOWAHC	chr2:110371910-110376564	KO	Rescue	OK	11.5658	16.2108	0.48709	3.07967	5e-05	0.00179837	yes	3.07967
TCONS_00040728	XLOC_016339	SERPINE2	chr2:224839764-224904036	KO	Rescue	OK	11.1746	6.47083	-0.788198	-3.07902	5e-05	0.00179837	yes	3.07902
TCONS_00006803	XLOC_002739	ENAH	chr1:225674533-225841061	KO	Rescue	OK	13.2404	6.18307	-1.09855	-3.07744	5e-05	0.00179837	yes	3.07744
TCONS_00019174	XLOC_007678	PCK2	chr14:24563482-24573339	KO	Rescue	OK	10.3316	14.91	0.52922	3.07425	5e-05	0.00179837	yes	3.07425
TCONS_00001789	XLOC_000708	GSTM4	chr1:110198697-110208123	KO	Rescue	OK	10.5615	6.93847	-0.606123	-3.07353	5e-05	0.00179837	yes	3.07353
TCONS_00016384	XLOC_006501	MGP	chr12:15034114-15038853	KO	Rescue	OK	14.4321	9.82691	-0.554473	-3.0731	5e-05	0.00179837	yes	3.0731
TCONS_00022948	XLOC_009260	-	chr15:59417270-59424267	KO	Rescue	OK	0.307931	0.535896	0.799344	3.07192	5e-05	0.00179837	yes	3.07192
TCONS_00017139	XLOC_006790	CPM	chr12:69244955-69357020	KO	Rescue	OK	4.94098	3.31643	-0.575164	-3.06812	5e-05	0.00179837	yes	3.06812
TCONS_00043703	XLOC_017553	-	chr21:44247464-44251564	KO	Rescue	OK	0.469332	0.228289	-1.03975	-3.06441	5e-05	0.00179837	yes	3.06441
TCONS_00021904	XLOC_008822	-	chr15:67142752-67145316	KO	Rescue	OK	0.252055	0.0616039	-2.03264	-3.06007	5e-05	0.00179837	yes	3.06007
TCONS_00058654	XLOC_023583	-	chr6:166303607-166310024	KO	Rescue	OK	0.401791	0.678927	0.75681	3.05657	5e-05	0.00179837	yes	3.05657
TCONS_00055846	XLOC_022414	DEF6	chr6:35265594-35289549	KO	Rescue	OK	1.69172	0.79557	-1.08843	-3.05648	5e-05	0.00179837	yes	3.05648
TCONS_00065853	XLOC_026880	-	chr8:88553243-88579277	KO	Rescue	OK	0.477814	0.0465993	-3.35807	-3.05499	0.0011	0.0244225	yes	3.05499
TCONS_00066740	XLOC_027235	IL11RA	chr9:34646585-34662689	KO	Rescue	OK	1.19143	0.325625	-1.87141	-3.052	5e-05	0.00179837	yes	3.052
TCONS_00036543	XLOC_014642	LINC00570	chr2:11534106-11543296	KO	Rescue	OK	1.39216	0.529712	-1.39405	-3.0505	5e-05	0.00179837	yes	3.0505
TCONS_00007298	XLOC_002937	CACNB2	chr10:18429605-18944083	KO	Rescue	OK	7.85142	12.2381	0.640353	3.04899	5e-05	0.00179837	yes	3.04899
TCONS_00021108	XLOC_008459	LINC00341	chr14:95873603-95876427	KO	Rescue	OK	0.500509	0.217828	-1.20021	-3.04897	5e-05	0.00179837	yes	3.04897
TCONS_00028626	XLOC_011458	TLCD2	chr17:1606083-1613662	KO	Rescue	OK	2.17165	1.31833	-0.720079	-3.04437	5e-05	0.00179837	yes	3.04437
TCONS_00050325	XLOC_020164	C4orf32	chr4:113066552-113110237	KO	Rescue	OK	1.29132	0.611825	-1.07765	-3.03819	5e-05	0.00179837	yes	3.03819
TCONS_00031130	XLOC_012430	CTIF	chr18:46065378-46389586	KO	Rescue	OK	4.93612	2.657	-0.893581	-3.03508	5e-05	0.00179837	yes	3.03508
TCONS_00010633	XLOC_004222	-	chr11:36498363-36502895	KO	Rescue	OK	0.222063	0.0833164	-1.4143	-3.03432	5e-05	0.00179837	yes	3.03432
TCONS_00047231	XLOC_018930	MYNN	chr3:169490212-169530574	KO	Rescue	OK	0.956174	2.08149	1.12227	3.03339	5e-05	0.00179837	yes	3.03339
TCONS_00043697	XLOC_017549	-	chr21:44019380-44027699	KO	Rescue	OK	0.568766	0.176842	-1.68537	-3.03143	5e-05	0.00179837	yes	3.03143
TCONS_00014159	XLOC_005633	ARHGAP32	chr11:128834954-129149479	KO	Rescue	OK	1.99626	0.137598	-3.85877	-3.0302	0.00035	0.00974863	yes	3.0302
TCONS_00068283	XLOC_027874	RMRP	chr9:35657747-35658015	KO	Rescue	OK	9.33746	18.6191	0.995684	3.02863	5e-05	0.00179837	yes	3.02863
TCONS_00066244	XLOC_027060	PTK2	chr8:141668474-142011543	KO	Rescue	OK	6.41449	1.89451	-1.75951	-3.02668	5e-05	0.00179837	yes	3.02668
TCONS_00054917	XLOC_022050	STC2	chr5:172741725-172756506	KO	Rescue	OK	5.57796	7.85785	0.494397	3.02664	5e-05	0.00179837	yes	3.02664
TCONS_00033718	XLOC_013438	ATF5	chr19:50392912-50437245	KO	Rescue	OK	17.2001	39.399	1.19574	3.02601	5e-05	0.00179837	yes	3.02601
TCONS_00038499	XLOC_015432	COL4A3	chr2:227867273-228179508	KO	Rescue	OK	2.42724	0.978163	-1.31117	-3.02489	5e-05	0.00179837	yes	3.02489
TCONS_00070762	XLOC_028901	ZNF185	chrX:152082985-152142025	KO	Rescue	OK	0.615577	1.19968	0.962637	3.024	5e-05	0.00179837	yes	3.024
TCONS_00040525	XLOC_016244	GPR1	chr2:207040041-207082771	KO	Rescue	OK	0.690583	0.301979	-1.19337	-3.02293	5e-05	0.00179837	yes	3.02293
TCONS_00017600	XLOC_006972	TESC	chr12:117476727-117537251	KO	Rescue	OK	27.886	18.2215	-0.613901	-3.02245	5e-05	0.00179837	yes	3.02245
TCONS_00014334	XLOC_005687	CD9	chr12:6309481-6347437	KO	Rescue	OK	180.583	130.645	-0.467015	-3.02021	5e-05	0.00179837	yes	3.02021
TCONS_00043212	XLOC_017345	-	chr21:45239406-45241449	KO	Rescue	OK	0.346747	0.100859	-1.78155	-3.01998	5e-05	0.00179837	yes	3.01998
TCONS_00029289	XLOC_011701	CRLF3	chr17:29103621-29151778	KO	Rescue	OK	6.8043	10.0181	0.558093	3.01761	5e-05	0.00179837	yes	3.01761
TCONS_00038076	XLOC_015277	COL3A1	chr2:189839098-189877472	KO	Rescue	OK	1.97317	1.30809	-0.593056	-3.01626	5e-05	0.00179837	yes	3.01626
TCONS_00021821	XLOC_008788	GCNT3	chr15:59902051-59912474	KO	Rescue	OK	0.468552	0.121877	-1.94279	-3.01277	0.00015	0.00477533	yes	3.01277
TCONS_00055527	XLOC_022299	ZKSCAN3	chr6:28292514-28340428	KO	Rescue	OK	2.82648	1.21697	-1.21571	-3.01219	5e-05	0.00179837	yes	3.01219
TCONS_00001658	XLOC_000652	-	chr1:100495094-100501451	KO	Rescue	OK	0.234966	0.429596	0.870529	3.00736	5e-05	0.00179837	yes	3.00736
TCONS_00027935	XLOC_011202	PCTP	chr17:53828339-53854748	KO	Rescue	OK	2.62541	4.2296	0.68798	3.00387	5e-05	0.00179837	yes	3.00387
TCONS_00012682	XLOC_005050	CCDC34	chr11:27354158-27384844	KO	Rescue	OK	37.6707	52.8579	0.488676	3.00305	5e-05	0.00179837	yes	3.00305
TCONS_00054366	XLOC_021827	LOX	chr5:121398886-121414265	KO	Rescue	OK	8.56364	5.76452	-0.571023	-2.99998	5e-05	0.00179837	yes	2.99998
TCONS_00032172	XLOC_012860	VAV1	chr19:6772678-6857377	KO	Rescue	OK	0.621218	1.74989	1.49409	2.99931	5e-05	0.00179837	yes	2.99931
TCONS_00049257	XLOC_019698	ETV5	chr3:185764105-185826907	KO	Rescue	OK	3.25431	0.200146	-4.02323	-2.99713	0.00265	0.0475015	yes	2.99713
TCONS_00043211	XLOC_017344	-	chr21:45238279-45239337	KO	Rescue	OK	0.520799	0.104695	-2.31454	-2.99254	0.0004	0.0109047	yes	2.99254
TCONS_00064794	XLOC_026408	SDC2	chr8:97505881-97624037	KO	Rescue	OK	48.9247	35.4822	-0.463469	-2.99039	5e-05	0.00179837	yes	2.99039
TCONS_00024504	XLOC_009824	-	chr16:33963007-33964169	KO	Rescue	OK	313.765	437.65	0.480094	2.98447	5e-05	0.00179837	yes	2.98447
TCONS_00022959	XLOC_009266	FOXB1	chr15:60291562-60299692	KO	Rescue	OK	0.0812185	0.249197	1.6174	2.97935	5e-05	0.00179837	yes	2.97935
TCONS_00036782	XLOC_014738	CRIM1	chr2:36582865-36778428	KO	Rescue	OK	11.488	5.34567	-1.10369	-2.97824	5e-05	0.00179837	yes	2.97824
TCONS_00010389	XLOC_004115	WEE1	chr11:9595227-9611313	KO	Rescue	OK	14.3656	19.9914	0.476764	2.97792	5e-05	0.00179837	yes	2.97792
TCONS_00033226	XLOC_013251	CCDC97	chr19:41816093-41830788	KO	Rescue	OK	9.58244	14.5052	0.598107	2.97776	5e-05	0.00179837	yes	2.97776
TCONS_00056757	XLOC_022814	-	chr6:154842449-154843483	KO	Rescue	OK	0.793678	0.240448	-1.72283	-2.97523	5e-05	0.00179837	yes	2.97523
TCONS_00036726	XLOC_014720	YPEL5	chr2:30369680-30383399	KO	Rescue	OK	6.20886	3.69529	-0.748642	-2.97456	5e-05	0.00179837	yes	2.97456
TCONS_00010587	XLOC_004203	CAT	chr11:34460471-34493607	KO	Rescue	OK	23.3447	32.376	0.47183	2.97283	5e-05	0.00179837	yes	2.97283
TCONS_00003121	XLOC_001286	-	chr1:207545130-207546698	KO	Rescue	OK	0.252161	0.664599	1.39814	2.96185	5e-05	0.00179837	yes	2.96185
TCONS_00058436	XLOC_023476	PERP	chr6:138409641-138428660	KO	Rescue	OK	43.3833	31.5747	-0.45837	-2.96166	5e-05	0.00179837	yes	2.96166
TCONS_00023045	XLOC_009301	DPP8	chr15:65734799-65810067	KO	Rescue	OK	7.06962	3.52353	-1.00461	-2.96004	5e-05	0.00179837	yes	2.96004
TCONS_00012578	XLOC_005009	RRAS2	chr11:14294760-14386052	KO	Rescue	OK	23.7422	33.759	0.507819	2.9574	5e-05	0.00179837	yes	2.9574
TCONS_00043698	XLOC_017550	-	chr21:44232375-44237051	KO	Rescue	OK	0.486911	0.138926	-1.80934	-2.95717	5e-05	0.00179837	yes	2.95717
TCONS_00050650	XLOC_020282	MSMO1	chr4:166248817-166264314	KO	Rescue	OK	24.2946	17.3769	-0.483465	-2.95179	5e-05	0.00179837	yes	2.95179
TCONS_00052360	XLOC_021004	PELO	chr5:52083606-52252348	KO	Rescue	OK	8.00436	3.86941	-1.04867	-2.95171	5e-05	0.00179837	yes	2.95171
TCONS_00042151	XLOC_016916	RRBP1	chr20:17594270-17663112	KO	Rescue	OK	24.1922	16.0345	-0.59336	-2.94812	5e-05	0.00179837	yes	2.94812
TCONS_00004589	XLOC_001837	RIMS3	chr1:41086351-41131329	KO	Rescue	OK	0.456458	0.13819	-1.72383	-2.94727	5e-05	0.00179837	yes	2.94727
TCONS_00030056	XLOC_012039	TRIM25	chr17:54965269-54991409	KO	Rescue	OK	19.1439	26.2807	0.457119	2.94662	5e-05	0.00179837	yes	2.94662
TCONS_00036626	XLOC_014686	MAPRE3	chr2:27193516-27250087	KO	Rescue	OK	1.9198	0.655464	-1.55037	-2.94561	5e-05	0.00179837	yes	2.94561
TCONS_00015452	XLOC_006134	-	chr12:88211538-88213879	KO	Rescue	OK	0.339098	0.11314	-1.58359	-2.94376	0.0001	0.00333804	yes	2.94376
TCONS_00071148	XLOC_029044	DYNLT3	chrX:37698088-37706889	KO	Rescue	OK	22.6856	31.36	0.46715	2.93861	5e-05	0.00179837	yes	2.93861
TCONS_00047136	XLOC_018892	MME	chr3:154741995-154901543	KO	Rescue	OK	1.13163	2.54114	1.16707	2.93821	5e-05	0.00179837	yes	2.93821
TCONS_00058457	XLOC_023485	-	chr6:141167095-141219599	KO	Rescue	OK	1.00752	2.51194	1.31798	2.93712	5e-05	0.00179837	yes	2.93712
TCONS_00023476	XLOC_009467	IDH2	chr15:90626207-90645850	KO	Rescue	OK	19.8804	13.8108	-0.525547	-2.93663	5e-05	0.00179837	yes	2.93663
TCONS_00066917	XLOC_027317	FAM189A2	chr9:71939487-72007370	KO	Rescue	OK	0.431333	0.106391	-2.01943	-2.93407	0.0002	0.00609992	yes	2.93407
TCONS_00027403	XLOC_011011	LINC00672	chr17:37081420-37085637	KO	Rescue	OK	0.214184	0.0716933	-1.57894	-2.93199	0.0001	0.00333804	yes	2.93199
TCONS_00054733	XLOC_021969	PDE6A	chr5:149237518-149324356	KO	Rescue	OK	0.428484	0.210195	-1.02751	-2.93193	5e-05	0.00179837	yes	2.93193
TCONS_00030493	XLOC_012201	DNAH17	chr17:76374500-76628305	KO	Rescue	OK	0.265562	0.904462	1.76801	2.92964	5e-05	0.00179837	yes	2.92964
TCONS_00037275	XLOC_014957	KCNIP3	chr2:95963071-96051825	KO	Rescue	OK	0.364484	0.0534187	-2.77044	-2.92619	0.00045	0.0120882	yes	2.92619
TCONS_00005579	XLOC_002246	GJA5	chr1:147228331-147245484	KO	Rescue	OK	0.802602	0.31938	-1.32941	-2.92574	5e-05	0.00179837	yes	2.92574
TCONS_00044408	XLOC_017826	H1F0	chr22:38201113-38203443	KO	Rescue	OK	9.28577	13.0721	0.493393	2.92126	5e-05	0.00179837	yes	2.92126
TCONS_00055268	XLOC_022201	-	chr6:14212352-14214632	KO	Rescue	OK	0.242139	0.0582029	-2.05667	-2.91988	0.00045	0.0120882	yes	2.91988
TCONS_00056827	XLOC_022842	-	chr6:160693594-160701440	KO	Rescue	OK	0.472405	0.860075	0.864437	2.91841	5e-05	0.00179837	yes	2.91841
TCONS_00063786	XLOC_025952	AKR1B1	chr7:134127106-134143888	KO	Rescue	OK	122.75	89.7619	-0.451549	-2.91224	5e-05	0.00179837	yes	2.91224
TCONS_00054099	XLOC_021725	ENC1	chr5:73923208-73937249	KO	Rescue	OK	0.398968	0.108592	-1.87736	-2.91034	5e-05	0.00179837	yes	2.91034
TCONS_00062707	XLOC_025494	CDCA7L	chr7:21582832-21985542	KO	Rescue	OK	11.3708	16.9613	0.57691	2.90988	5e-05	0.00179837	yes	2.90988
TCONS_00028081	XLOC_011266	-	chr17:62468593-62470116	KO	Rescue	OK	0.517199	0.168212	-1.62044	-2.90924	5e-05	0.00179837	yes	2.90924
TCONS_00005970	XLOC_002383	ARHGEF2	chr1:155916526-155949115	KO	Rescue	OK	3.12076	6.06499	0.958609	2.9075	5e-05	0.00179837	yes	2.9075
TCONS_00065966	XLOC_026932	RNF19A	chr8:101269287-101322379	KO	Rescue	OK	21.999	14.9539	-0.556913	-2.90688	5e-05	0.00179837	yes	2.90688
TCONS_00009563	XLOC_003793	MYOF	chr10:95066185-95242074	KO	Rescue	OK	4.32792	10.5179	1.2811	2.90499	5e-05	0.00179837	yes	2.90499
TCONS_00010693	XLOC_004245	SLC35C1	chr11:45825622-45834567	KO	Rescue	OK	5.38674	7.67243	0.510271	2.9029	5e-05	0.00179837	yes	2.9029
TCONS_00068906	XLOC_028158	STOM	chr9:124101265-124132582	KO	Rescue	OK	50.329	36.7739	-0.452709	-2.90089	5e-05	0.00179837	yes	2.90089
TCONS_00037549	XLOC_015070	INSIG2	chr2:118846049-118868531	KO	Rescue	OK	3.62765	2.22323	-0.706381	-2.89824	5e-05	0.00179837	yes	2.89824
TCONS_00064796	XLOC_026409	CPQ	chr8:97657472-98161761	KO	Rescue	OK	4.17004	2.48033	-0.749529	-2.89691	5e-05	0.00179837	yes	2.89691
TCONS_00060940	XLOC_024771	IQCE	chr7:2598589-2654458	KO	Rescue	OK	1.18425	3.2513	1.45704	2.89419	5e-05	0.00179837	yes	2.89419
TCONS_00013686	XLOC_005457	NAALAD2	chr11:89867817-89932581	KO	Rescue	OK	1.38329	2.07771	0.586898	2.89326	5e-05	0.00179837	yes	2.89326
TCONS_00061263	XLOC_024902	LOC646999	chr7:39649085-39651687	KO	Rescue	OK	0.253471	0.0724545	-1.80668	-2.8931	5e-05	0.00179837	yes	2.8931
TCONS_00039425	XLOC_015800	PAIP2B	chr2:71409867-71454233	KO	Rescue	OK	0.613688	0.307628	-0.996316	-2.89257	5e-05	0.00179837	yes	2.89257
TCONS_00026882	XLOC_010798	GLP2R	chr17:9729380-9797544	KO	Rescue	OK	14.8481	20.762	0.483675	2.88233	5e-05	0.00179837	yes	2.88233
TCONS_00031435	XLOC_012557	LAMA1	chr18:6939006-7117813	KO	Rescue	OK	53.274	83.4229	0.647011	2.88216	5e-05	0.00179837	yes	2.88216
TCONS_00032496	XLOC_012969	ZSWIM4	chr19:13906223-13943044	KO	Rescue	OK	5.95041	3.83562	-0.63353	-2.8795	5e-05	0.00179837	yes	2.8795
TCONS_00025738	XLOC_010306	USP31	chr16:23072639-23160783	KO	Rescue	OK	2.73685	1.15978	-1.23867	-2.87524	5e-05	0.00179837	yes	2.87524
TCONS_00004998	XLOC_001997	NEGR1	chr1:71868624-72748277	KO	Rescue	OK	0.124295	0.260324	1.06654	2.87305	5e-05	0.00179837	yes	2.87305
TCONS_00038067	XLOC_015273	ITGAV	chr2:187454789-187545628	KO	Rescue	OK	24.5015	17.998	-0.445031	-2.87073	5e-05	0.00179837	yes	2.87073
TCONS_00013491	XLOC_005387	CHRDL2	chr11:74407472-74442186	KO	Rescue	OK	2.12001	0.86714	-1.28974	-2.86946	5e-05	0.00179837	yes	2.86946
TCONS_00021543	XLOC_008692	CHP1	chr15:41523436-41574083	KO	Rescue	OK	103.882	76.3045	-0.44511	-2.86941	5e-05	0.00179837	yes	2.86941
TCONS_00052137	XLOC_020901	MTRR	chr5:7869216-7901235	KO	Rescue	OK	4.33198	12.9167	1.57614	2.86927	0.0002	0.00609992	yes	2.86927
TCONS_00047642	XLOC_019105	CAND2	chr3:12838170-12876313	KO	Rescue	OK	0.0835444	0.384306	2.20164	2.86641	0.00015	0.00477533	yes	2.86641
TCONS_00047219	XLOC_018926	SERPINI1	chr3:167453304-167543357	KO	Rescue	OK	27.8089	19.7615	-0.492857	-2.86354	5e-05	0.00179837	yes	2.86354
TCONS_00029523	XLOC_011784	MED24	chr17:38175347-38210980	KO	Rescue	OK	11.0112	17.5236	0.670328	2.85764	5e-05	0.00179837	yes	2.85764
TCONS_00051143	XLOC_020494	SCFD2	chr4:53739150-54232242	KO	Rescue	OK	2.40091	0.690687	-1.79748	-2.85583	5e-05	0.00179837	yes	2.85583
TCONS_00060966	XLOC_024783	RBAK	chr7:5085451-5112854	KO	Rescue	OK	2.90759	4.84902	0.737871	2.85374	5e-05	0.00179837	yes	2.85374
TCONS_00026576	XLOC_010678	SERPINF2	chr17:1646129-1658559	KO	Rescue	OK	0.778687	1.39729	0.843514	2.85039	5e-05	0.00179837	yes	2.85039
TCONS_00017422	XLOC_006905	SLC41A2	chr12:105195572-105352530	KO	Rescue	OK	3.93304	2.0979	-0.906696	-2.85031	5e-05	0.00179837	yes	2.85031
TCONS_00019567	XLOC_007812	FUT8	chr14:65877309-66210878	KO	Rescue	OK	4.44248	3.1123	-0.513385	-2.84776	5e-05	0.00179837	yes	2.84776
TCONS_00037551	XLOC_015071	MARCO	chr2:119699744-119752236	KO	Rescue	OK	0.303718	0.0416501	-2.86634	-2.84635	0.0014	0.0292935	yes	2.84635
TCONS_00052264	XLOC_020961	SKP2	chr5:36152144-36184142	KO	Rescue	OK	46.018	64.0516	0.477037	2.84614	5e-05	0.00179837	yes	2.84614
TCONS_00039606	XLOC_015872	KRCC1	chr2:88326723-88355300	KO	Rescue	OK	1.61796	0.223674	-2.85471	-2.84567	0.0009	0.0207972	yes	2.84567
TCONS_00014536	XLOC_005768	TMEM52B	chr12:10324824-10344589	KO	Rescue	OK	3.51436	1.92535	-0.868142	-2.8454	5e-05	0.00179837	yes	2.8454
TCONS_00003384	XLOC_001391	OBSCN	chr1:228391206-228566575	KO	Rescue	OK	1.80572	0.907026	-0.993357	-2.84474	5e-05	0.00179837	yes	2.84474
TCONS_00061714	XLOC_025090	FZD1	chr7:90893782-90898132	KO	Rescue	OK	1.24939	0.792831	-0.656142	-2.84418	5e-05	0.00179837	yes	2.84418
TCONS_00005237	XLOC_002096	-	chr1:109099515-109101392	KO	Rescue	OK	0.240365	0.0379451	-2.66324	-2.84099	0.0012	0.025911	yes	2.84099
TCONS_00014286	XLOC_005662	FKBP4	chr12:2904099-2914587	KO	Rescue	OK	72.7056	105.225	0.533339	2.83747	5e-05	0.00179837	yes	2.83747
TCONS_00062968	XLOC_025594	-	chr7:44593963-44595552	KO	Rescue	OK	0.334616	0.0674963	-2.30963	-2.83633	0.0006	0.0150866	yes	2.83633
TCONS_00014689	XLOC_005841	CMAS	chr12:22199109-22218606	KO	Rescue	OK	28.7139	20.8994	-0.458282	-2.83465	5e-05	0.00179837	yes	2.83465
TCONS_00050195	XLOC_020114	HERC5	chr4:89377875-89427320	KO	Rescue	OK	7.76916	5.53375	-0.489501	-2.83042	5e-05	0.00179837	yes	2.83042
TCONS_00027730	XLOC_011137	GOSR2	chr17:45000479-45044309	KO	Rescue	OK	35.05	11.345	-1.62736	-2.82988	0.00015	0.00477533	yes	2.82988
TCONS_00010604	XLOC_004214	-	chr11:35036217-35040326	KO	Rescue	OK	0.138175	0.306417	1.149	2.82759	5e-05	0.00179837	yes	2.82759
TCONS_00015037	XLOC_005964	-	chr12:52644878-52649985	KO	Rescue	OK	0.628329	0.367644	-0.773213	-2.82724	5e-05	0.00179837	yes	2.82724
TCONS_00038750	XLOC_015516	ANO7	chr2:242127923-242165613	KO	Rescue	OK	0.148369	0.311506	1.07007	2.82268	5e-05	0.00179837	yes	2.82268
TCONS_00034959	XLOC_013967	LPHN1	chr19:14247963-14318135	KO	Rescue	OK	0.471754	1.7266	1.87182	2.81899	0.00015	0.00477533	yes	2.81899
TCONS_00021215	XLOC_008503	AHNAK2	chr14:105403590-105444697	KO	Rescue	OK	1.36507	0.495948	-1.46071	-2.81561	5e-05	0.00179837	yes	2.81561
TCONS_00031904	XLOC_012740	HCN2	chr19:589892-617159	KO	Rescue	OK	13.4262	9.77915	-0.457273	-2.81327	5e-05	0.00179837	yes	2.81327
TCONS_00039553	XLOC_015854	CAPG	chr2:85621870-85641197	KO	Rescue	OK	76.4143	55.0161	-0.47399	-2.80553	5e-05	0.00179837	yes	2.80553
TCONS_00001091	XLOC_000428	DMAP1	chr1:44678969-44686375	KO	Rescue	OK	7.1105	13.4011	0.91433	2.80444	5e-05	0.00179837	yes	2.80444
TCONS_00027728	XLOC_011137	GOSR2	chr17:45000479-45044309	KO	Rescue	OK	9.01233	5.4462	-0.72665	-2.80316	5e-05	0.00179837	yes	2.80316
TCONS_00010624	XLOC_004221	PRR5L	chr11:36317724-36498243	KO	Rescue	OK	4.90839	2.67554	-0.875418	-2.80212	5e-05	0.00179837	yes	2.80212
TCONS_00054094	XLOC_021725	ENC1	chr5:73923208-73937249	KO	Rescue	OK	0.914317	0.430346	-1.0872	-2.8008	5e-05	0.00179837	yes	2.8008
TCONS_00039605	XLOC_015872	KRCC1	chr2:88326723-88355300	KO	Rescue	OK	1.37932	0.364676	-1.91927	-2.80068	5e-05	0.00179837	yes	2.80068
TCONS_00010774	XLOC_004263	MADD	chr11:47290839-47351582	KO	Rescue	OK	1.18674	3.12296	1.39591	2.79972	5e-05	0.00179837	yes	2.79972
TCONS_00057991	XLOC_023314	PHIP	chr6:79644135-79788011	KO	Rescue	OK	13.1264	17.7248	0.433296	2.79839	5e-05	0.00179837	yes	2.79839
TCONS_00003894	XLOC_001575	GPR157	chr1:9160369-9189235	KO	Rescue	OK	1.32002	0.560205	-1.23654	-2.79815	0.0002	0.00609992	yes	2.79815
TCONS_00010431	XLOC_004132	FAR1	chr11:13690205-13753893	KO	Rescue	OK	25.1549	33.9471	0.432449	2.79407	5e-05	0.00179837	yes	2.79407
TCONS_00038105	XLOC_015287	GLS	chr2:191745520-191830273	KO	Rescue	OK	19.2188	13.5149	-0.507967	-2.79342	5e-05	0.00179837	yes	2.79342
TCONS_00043024	XLOC_017277	CBR1	chr21:37441939-37498938	KO	Rescue	OK	49.735	67.5788	0.44231	2.79131	5e-05	0.00179837	yes	2.79131
TCONS_00013016	XLOC_005202	TMEM258	chr11:61556601-61560085	KO	Rescue	OK	194.781	264.889	0.443532	2.78987	5e-05	0.00179837	yes	2.78987
TCONS_00065538	XLOC_026750	FGFR1	chr8:38268631-38326352	KO	Rescue	OK	2.0201	1.00739	-1.00381	-2.78159	5e-05	0.00179837	yes	2.78159
TCONS_00026313	XLOC_010564	FA2H	chr16:74746855-74808729	KO	Rescue	OK	5.16685	2.77391	-0.897362	-2.78124	5e-05	0.00179837	yes	2.78124
TCONS_00052740	XLOC_021142	RHOBTB3	chr5:95066849-95132071	KO	Rescue	OK	28.9724	21.4744	-0.43206	-2.78102	5e-05	0.00179837	yes	2.78102
TCONS_00033283	XLOC_013275	CD177	chr19:43857824-43867480	KO	Rescue	OK	0.316867	0.0967766	-1.71115	-2.77805	5e-05	0.00179837	yes	2.77805
TCONS_00071349	XLOC_029122	IQSEC2	chrX:53262057-53350522	KO	Rescue	OK	0.73212	0.225264	-1.70046	-2.77096	0.0001	0.00333804	yes	2.77096
TCONS_00038807	XLOC_015537	TMEM18	chr2:663923-677439	KO	Rescue	OK	6.02047	8.80604	0.548619	2.77015	5e-05	0.00179837	yes	2.77015
TCONS_00018900	XLOC_007521	-	chr13:83491346-83676520	KO	Rescue	OK	0.696531	1.27445	0.871616	2.76943	5e-05	0.00179837	yes	2.76943
TCONS_00035242	XLOC_014087	ANKRD27	chr19:33087906-33166103	KO	Rescue	OK	6.15305	9.30618	0.596888	2.7684	5e-05	0.00179837	yes	2.7684
TCONS_00024983	XLOC_010007	NUDT7	chr16:77756388-77776157	KO	Rescue	OK	1.69077	0.541986	-1.64135	-2.76758	0.00015	0.00477533	yes	2.76758
TCONS_00049765	XLOC_019916	PI4K2B	chr4:25235582-25281754	KO	Rescue	OK	10.1797	7.26753	-0.486155	-2.76626	5e-05	0.00179837	yes	2.76626
TCONS_00048706	XLOC_019485	HEG1	chr3:124684391-124775121	KO	Rescue	OK	6.34208	4.03602	-0.652023	-2.76591	5e-05	0.00179837	yes	2.76591
TCONS_00063922	XLOC_026019	PDIA4	chr7:148700153-148725782	KO	Rescue	OK	58.9578	79.2919	0.42749	2.76591	5e-05	0.00179837	yes	2.76591
TCONS_00002646	XLOC_001085	-	chr1:165897102-165899397	KO	Rescue	OK	0.252656	0.072827	-1.79463	-2.76401	0.0003	0.00855389	yes	2.76401
TCONS_00010558	XLOC_004188	RCN1	chr11:32112476-32127272	KO	Rescue	OK	184.328	248.62	0.431671	2.76363	5e-05	0.00179837	yes	2.76363
TCONS_00029059	XLOC_011608	TRIM16	chr17:15526668-15587633	KO	Rescue	OK	17.6931	25.0297	0.500453	2.76339	5e-05	0.00179837	yes	2.76339
TCONS_00063149	XLOC_025680	-	chr7:66384613-66386050	KO	Rescue	OK	0.3273	0.0756124	-2.11392	-2.76122	0.001	0.0226328	yes	2.76122
TCONS_00058016	XLOC_023325	ME1	chr6:83920109-84140938	KO	Rescue	OK	15.0455	20.374	0.437398	2.75997	5e-05	0.00179837	yes	2.75997
TCONS_00022124	XLOC_008915	KIAA1024	chr15:79724857-79764642	KO	Rescue	OK	0.426292	0.235035	-0.858969	-2.75726	5e-05	0.00179837	yes	2.75726
TCONS_00053237	XLOC_021321	RBM27	chr5:145583012-145670426	KO	Rescue	OK	3.8753	1.84983	-1.06692	-2.75537	5e-05	0.00179837	yes	2.75537
TCONS_00049180	XLOC_019670	GNB4	chr3:179112443-179169371	KO	Rescue	OK	30.1032	40.4643	0.426734	2.75485	5e-05	0.00179837	yes	2.75485
TCONS_00039341	XLOC_015759	VPS54	chr2:64119666-64246214	KO	Rescue	OK	2.07321	3.91415	0.916834	2.75437	5e-05	0.00179837	yes	2.75437
TCONS_00010610	XLOC_004216	CD44	chr11:35160416-35253949	KO	Rescue	OK	4.62758	10.2357	1.14528	2.75272	5e-05	0.00179837	yes	2.75272
TCONS_00067276	XLOC_027457	AKAP2	chr9:112403067-112934793	KO	Rescue	OK	6.08647	4.04129	-0.590789	-2.75239	5e-05	0.00179837	yes	2.75239
TCONS_00010384	XLOC_004112	IPO7	chr11:9406168-9469674	KO	Rescue	OK	97.4314	131.671	0.434481	2.75077	5e-05	0.00179837	yes	2.75077
TCONS_00033694	XLOC_013429	PRMT1	chr19:50180221-50194247	KO	Rescue	OK	120.114	168.242	0.486131	2.75056	5e-05	0.00179837	yes	2.75056
TCONS_00008806	XLOC_003533	PIP4K2A	chr10:22823765-23003503	KO	Rescue	OK	12.6038	9.25991	-0.444785	-2.74979	5e-05	0.00179837	yes	2.74979
TCONS_00018070	XLOC_007165	-	chr13:44884940-44896813	KO	Rescue	OK	0.774433	0.498031	-0.636905	-2.74886	5e-05	0.00179837	yes	2.74886
TCONS_00011657	XLOC_004613	TMEM126B	chr11:85339610-85347583	KO	Rescue	OK	11.4131	20.4535	0.841659	2.74815	5e-05	0.00179837	yes	2.74815
TCONS_00018848	XLOC_007503	KLF12	chr13:74260009-74708621	KO	Rescue	OK	0.72535	1.20219	0.728912	2.74696	5e-05	0.00179837	yes	2.74696
TCONS_00015946	XLOC_006333	-	chr12:125537953-125540556	KO	Rescue	OK	0.228021	0.492209	1.1101	2.74685	5e-05	0.00179837	yes	2.74685
TCONS_00030334	XLOC_012141	CDC42EP4	chr17:71279762-71308143	KO	Rescue	OK	69.3282	51.1273	-0.439347	-2.74673	5e-05	0.00179837	yes	2.74673
TCONS_00013801	XLOC_005505	-	chr11:105869257-105876078	KO	Rescue	OK	0.166607	0.304795	0.871387	2.7467	5e-05	0.00179837	yes	2.7467
TCONS_00058704	XLOC_023613	PHF10	chr6:170102206-170124616	KO	Rescue	OK	58.8409	38.1757	-0.624166	-2.74667	5e-05	0.00179837	yes	2.74667
TCONS_00030445	XLOC_012181	EXOC7	chr17:74075262-74099868	KO	Rescue	OK	8.40366	3.92306	-1.09904	-2.74648	5e-05	0.00179837	yes	2.74648
TCONS_00056172	XLOC_022549	BAG2	chr6:57037103-57050012	KO	Rescue	OK	48.4304	65.1233	0.42726	2.74583	5e-05	0.00179837	yes	2.74583
TCONS_00058638	XLOC_023567	-	chr6:166209860-166214876	KO	Rescue	OK	0.132358	0.27507	1.05536	2.74572	5e-05	0.00179837	yes	2.74572
TCONS_00016743	XLOC_006640	LIMA1	chr12:50569552-50677353	KO	Rescue	OK	36.2917	17.0345	-1.09118	-2.74361	5e-05	0.00179837	yes	2.74361
TCONS_00017416	XLOC_006903	NFYB	chr12:104510853-104532040	KO	Rescue	OK	2.13906	5.44291	1.3474	2.74225	5e-05	0.00179837	yes	2.74225
TCONS_00049610	XLOC_019836	WFS1	chr4:6271576-6304992	KO	Rescue	OK	7.59349	5.14378	-0.561933	-2.73972	5e-05	0.00179837	yes	2.73972
TCONS_00033409	XLOC_013310	RELB	chr19:45504616-45541484	KO	Rescue	OK	5.19913	3.06346	-0.763109	-2.73597	5e-05	0.00179837	yes	2.73597
TCONS_00021154	XLOC_008478	HSP90AA1	chr14:102547074-102606086	KO	Rescue	OK	673.141	940.209	0.482073	2.73531	5e-05	0.00179837	yes	2.73531
TCONS_00021819	XLOC_008787	FAM81A	chr15:59730371-59815751	KO	Rescue	OK	14.1659	10.4302	-0.441657	-2.73508	5e-05	0.00179837	yes	2.73508
TCONS_00062530	XLOC_025412	NOM1	chr7:156742416-156765876	KO	Rescue	OK	7.75827	10.4872	0.434826	2.73046	5e-05	0.00179837	yes	2.73046
TCONS_00028308	XLOC_011351	MGAT5B	chr17:74864470-74946497	KO	Rescue	OK	1.30501	3.2182	1.30219	2.72784	5e-05	0.00179837	yes	2.72784
TCONS_00054377	XLOC_021834	ALDH7A1	chr5:125877532-125931082	KO	Rescue	OK	24.8299	18.4942	-0.42501	-2.72735	5e-05	0.00179837	yes	2.72735
TCONS_00036133	XLOC_014470	ZNF350	chr19:52467488-52490079	KO	Rescue	OK	0.50987	1.03646	1.02346	2.72733	5e-05	0.00179837	yes	2.72733
TCONS_00057489	XLOC_023099	GPSM3	chr6:32158542-32191844	KO	Rescue	OK	1.16638	0.549971	-1.08461	-2.72689	5e-05	0.00179837	yes	2.72689
TCONS_00056337	XLOC_022614	POU3F2	chr6:99282579-99286666	KO	Rescue	OK	0.199734	0.391667	0.971546	2.72467	5e-05	0.00179837	yes	2.72467
TCONS_00068707	XLOC_028073	CORO2A	chr9:100883256-100954956	KO	Rescue	OK	2.0184	2.85077	0.498142	2.72406	5e-05	0.00179837	yes	2.72406
TCONS_00003931	XLOC_001591	FBXO2	chr1:11708417-11723386	KO	Rescue	OK	27.8328	19.6356	-0.503315	-2.72319	5e-05	0.00179837	yes	2.72319
TCONS_00027942	XLOC_011205	DGKE	chr17:54869273-54946878	KO	Rescue	OK	1.28241	1.99346	0.636413	2.7231	5e-05	0.00179837	yes	2.7231
TCONS_00065858	XLOC_026884	-	chr8:90598098-90600270	KO	Rescue	OK	0.504722	0.220434	-1.19514	-2.72204	5e-05	0.00179837	yes	2.72204
TCONS_00055135	XLOC_022146	FOXF2	chr6:1383392-1395836	KO	Rescue	OK	5.07396	7.78767	0.61808	2.72011	5e-05	0.00179837	yes	2.72011
TCONS_00058185	XLOC_023384	OSTM1	chr6:108362612-108395941	KO	Rescue	OK	10.4546	7.70392	-0.440467	-2.71904	5e-05	0.00179837	yes	2.71904
TCONS_00028094	XLOC_011275	PITPNC1	chr17:65373396-65693379	KO	Rescue	OK	4.26801	5.89902	0.466913	2.7179	5e-05	0.00179837	yes	2.7179
TCONS_00044702	XLOC_017958	-	chr22:51066705-51075214	KO	Rescue	OK	0.305689	0.0311342	-3.29549	-2.71549	0.0011	0.0244225	yes	2.71549
TCONS_00016216	XLOC_006418	C1R	chr12:7187514-7245043	KO	Rescue	OK	1.9486	1.22324	-0.671736	-2.71533	5e-05	0.00179837	yes	2.71533
TCONS_00041562	XLOC_016675	WISP2	chr20:43342934-43356452	KO	Rescue	OK	40.8338	24.1237	-0.759311	-2.71396	5e-05	0.00179837	yes	2.71396
TCONS_00041124	XLOC_016509	SPTLC3	chr20:12989575-13148773	KO	Rescue	OK	0.487133	0.151591	-1.68413	-2.71234	0.00015	0.00477533	yes	2.71234
TCONS_00012687	XLOC_005053	LIN7C	chr11:27510014-27528355	KO	Rescue	OK	21.5768	28.983	0.425722	2.71071	5e-05	0.00179837	yes	2.71071
TCONS_00020152	XLOC_008086	TDRD9	chr14:104394765-104519004	KO	Rescue	OK	5.76535	8.40265	0.543435	2.71028	5e-05	0.00179837	yes	2.71028
TCONS_00039646	XLOC_015903	DUSP2	chr2:96808907-96811179	KO	Rescue	OK	16.7773	12.1851	-0.461387	-2.71009	5e-05	0.00179837	yes	2.71009
TCONS_00071759	XLOC_029280	RNU6-28	chrX:110537006-110664835	KO	Rescue	OK	2051.36	984.756	-1.05874	-2.70964	5e-05	0.00179837	yes	2.70964
TCONS_00023688	XLOC_009547	CACNA1H	chr16:1203127-1275254	KO	Rescue	OK	0.544802	0.126649	-2.10489	-2.70735	5e-05	0.00179837	yes	2.70735
TCONS_00041572	XLOC_016682	PI3	chr20:43803539-43805185	KO	Rescue	OK	3.70763	1.85848	-0.996374	-2.70606	5e-05	0.00179837	yes	2.70606
TCONS_00058432	XLOC_023473	IFNGR1	chr6:137518620-137540567	KO	Rescue	OK	14.1832	10.3377	-0.456271	-2.70604	0.0001	0.00333804	yes	2.70604
TCONS_00033091	XLOC_013195	SIPA1L3	chr19:38397838-38699151	KO	Rescue	OK	0.814873	0.127007	-2.68166	-2.70532	0.00095	0.0216666	yes	2.70532
TCONS_00055301	XLOC_022218	RNF144B	chr6:18387578-18469105	KO	Rescue	OK	3.90777	2.13962	-0.868989	-2.70256	0.0002	0.00609992	yes	2.70256
TCONS_00013830	XLOC_005518	KDELC2	chr11:108342832-108369333	KO	Rescue	OK	10.1081	15.4189	0.609188	2.7013	5e-05	0.00179837	yes	2.7013
TCONS_00010425	XLOC_004129	TEAD1	chr11:12695550-12966560	KO	Rescue	OK	38.3297	52.5044	0.453976	2.70083	5e-05	0.00179837	yes	2.70083
TCONS_00058651	XLOC_023580	-	chr6:166262656-166273762	KO	Rescue	OK	0.240263	0.382279	0.670012	2.69921	5e-05	0.00179837	yes	2.69921
TCONS_00038486	XLOC_015427	NYAP2	chr2:226265601-226568349	KO	Rescue	OK	1.58486	2.3057	0.54085	2.69848	5e-05	0.00179837	yes	2.69848
TCONS_00019250	XLOC_007705	G2E3	chr14:31028328-31089046	KO	Rescue	OK	4.63216	6.30977	0.445901	2.69814	5e-05	0.00179837	yes	2.69814
TCONS_00067361	XLOC_027487	PAPPA	chr9:118916070-119164600	KO	Rescue	OK	5.86684	4.35692	-0.429276	-2.69733	5e-05	0.00179837	yes	2.69733
TCONS_00037035	XLOC_014848	ANXA4	chr2:69969126-70053596	KO	Rescue	OK	38.0155	28.2882	-0.42639	-2.69706	5e-05	0.00179837	yes	2.69706
TCONS_00029809	XLOC_011920	FAM171A2	chr17:42431100-42441235	KO	Rescue	OK	4.67663	3.26581	-0.518027	-2.69702	5e-05	0.00179837	yes	2.69702
TCONS_00011725	XLOC_004655	KDM4D	chr11:94706844-94732725	KO	Rescue	OK	0.48642	0.997012	1.03541	2.69619	5e-05	0.00179837	yes	2.69619
TCONS_00064420	XLOC_026220	-	chr8:32785468-32902578	KO	Rescue	OK	0.332967	1.05909	1.66938	2.69608	0.00055	0.0141432	yes	2.69608
TCONS_00005163	XLOC_002063	ABCA4	chr1:94458393-94586705	KO	Rescue	OK	0.303413	0.170769	-0.829232	-2.69543	5e-05	0.00179837	yes	2.69543
TCONS_00056634	XLOC_022758	HEBP2	chr6:138725335-138737471	KO	Rescue	OK	10.2923	7.15795	-0.523942	-2.69524	5e-05	0.00179837	yes	2.69524
TCONS_00051630	XLOC_020694	ANXA5	chr4:122589151-122618147	KO	Rescue	OK	223.274	167.25	-0.416809	-2.69471	5e-05	0.00179837	yes	2.69471
TCONS_00065971	XLOC_026933	ANKRD46	chr8:101521979-101572014	KO	Rescue	OK	6.81658	4.57402	-0.575586	-2.6945	5e-05	0.00179837	yes	2.6945
TCONS_00019010	XLOC_007589	-	chr13:109871426-109888512	KO	Rescue	OK	0.255711	0.384008	0.586623	2.69446	5e-05	0.00179837	yes	2.69446
TCONS_00004444	XLOC_001779	TRIM62	chr1:33611002-33647671	KO	Rescue	OK	2.61207	1.80136	-0.536102	-2.69237	5e-05	0.00179837	yes	2.69237
TCONS_00034824	XLOC_013919	ELOF1	chr19:11663857-11670051	KO	Rescue	OK	67.479	50.0892	-0.429938	-2.69166	5e-05	0.00179837	yes	2.69166
TCONS_00012876	XLOC_005116	CELF1	chr11:47487429-47574966	KO	Rescue	OK	18.5319	7.4963	-1.30576	-2.69055	5e-05	0.00179837	yes	2.69055
TCONS_00037161	XLOC_014896	-	chr2:75503696-75506851	KO	Rescue	OK	0.564167	0.229453	-1.29792	-2.68975	0.00015	0.00477533	yes	2.68975
TCONS_00025233	XLOC_010090	TCF25	chr16:89939292-89987385	KO	Rescue	OK	2.12558	0.653752	-1.70104	-2.6891	0.0002	0.00609992	yes	2.6891
TCONS_00034758	XLOC_013901	CDKN2D	chr19:10677137-10680125	KO	Rescue	OK	3.01585	1.63634	-0.882091	-2.68881	5e-05	0.00179837	yes	2.68881
TCONS_00029471	XLOC_011775	STAC2	chr17:37366788-37382040	KO	Rescue	OK	1.29977	0.818556	-0.667098	-2.68633	5e-05	0.00179837	yes	2.68633
TCONS_00005774	XLOC_002336	S100A4	chr1:153516088-153525365	KO	Rescue	OK	459.726	628.852	0.451945	2.68525	5e-05	0.00179837	yes	2.68525
TCONS_00063312	XLOC_025751	STEAP4	chr7:87905618-87936228	KO	Rescue	OK	2.49874	1.07889	-1.21165	-2.68487	5e-05	0.00179837	yes	2.68487
TCONS_00017694	XLOC_007009	HPD	chr12:122277432-122326517	KO	Rescue	OK	216.296	161.579	-0.420762	-2.68315	5e-05	0.00179837	yes	2.68315
TCONS_00029003	XLOC_011583	GAS7	chr17:9813925-10101868	KO	Rescue	OK	0.230566	0.486305	1.07668	2.68109	0.00015	0.00477533	yes	2.68109
TCONS_00027571	XLOC_011088	-	chr17:41381678-41382351	KO	Rescue	OK	0.602557	1.5542	1.367	2.67985	5e-05	0.00179837	yes	2.67985
TCONS_00047939	XLOC_019207	FYCO1	chr3:45959390-46037317	KO	Rescue	OK	1.06592	0.387134	-1.46119	-2.67935	5e-05	0.00179837	yes	2.67935
TCONS_00005866	XLOC_002364	DPM3	chr1:155112365-155113044	KO	Rescue	OK	41.6655	27.6001	-0.594179	-2.6765	5e-05	0.00179837	yes	2.6765
TCONS_00012480	XLOC_004968	ST5	chr11:8713824-8932498	KO	Rescue	OK	0.888746	0.120391	-2.88405	-2.67584	0.0012	0.025911	yes	2.67584
TCONS_00067585	XLOC_027558	SPTAN1	chr9:131314836-131419129	KO	Rescue	OK	10.7692	3.40765	-1.66006	-2.67507	0.00015	0.00477533	yes	2.67507
TCONS_00031888	XLOC_012733	PARD6G	chr18:77905806-78005480	KO	Rescue	OK	0.933628	0.495265	-0.914648	-2.67431	5e-05	0.00179837	yes	2.67431
TCONS_00039807	XLOC_015961	NPHP1	chr2:110880913-110962639	KO	Rescue	OK	1.34146	0.423377	-1.66379	-2.67172	0.00025	0.00734573	yes	2.67172
TCONS_00043946	XLOC_017650	TANGO2	chr22:20008622-20055476	KO	Rescue	OK	7.01149	4.49977	-0.63987	-2.67116	5e-05	0.00179837	yes	2.67116
TCONS_00002325	XLOC_000965	ADAM15	chr1:155006281-155042029	KO	Rescue	OK	48.9867	66.9959	0.451682	2.67108	5e-05	0.00179837	yes	2.67108
TCONS_00000516	XLOC_000209	NBPF3	chr1:21766529-21811456	KO	Rescue	OK	0.992758	0.418291	-1.24694	-2.66858	0.00015	0.00477533	yes	2.66858
TCONS_00050651	XLOC_020283	CPE	chr4:166300096-166419482	KO	Rescue	OK	0.501174	0.233899	-1.09942	-2.66829	5e-05	0.00179837	yes	2.66829
TCONS_00046820	XLOC_018762	CHST13	chr3:126243130-126262134	KO	Rescue	OK	0.515988	0.212038	-1.28302	-2.66773	0.00025	0.00734573	yes	2.66773
TCONS_00025574	XLOC_010217	PPL	chr16:4932507-4987136	KO	Rescue	OK	5.27837	3.87965	-0.444167	-2.66671	5e-05	0.00179837	yes	2.66671
TCONS_00008721	XLOC_003491	UPF2	chr10:11962017-12085169	KO	Rescue	OK	3.75083	0.539021	-2.7988	-2.66502	0.0007	0.0170555	yes	2.66502
TCONS_00053308	XLOC_021348	SYNPO	chr5:149980641-150038792	KO	Rescue	OK	6.50703	4.00118	-0.701576	-2.65979	5e-05	0.00179837	yes	2.65979
TCONS_00070097	XLOC_028631	DLG3	chrX:69664704-69725339	KO	Rescue	OK	3.31252	4.97189	0.585868	2.65689	5e-05	0.00179837	yes	2.65689
TCONS_00010371	XLOC_004105	RPL27A	chr11:8633452-8711419	KO	Rescue	OK	152.21	205.568	0.433556	2.65672	5e-05	0.00179837	yes	2.65672
TCONS_00045622	XLOC_018301	LMCD1	chr3:8543510-8609806	KO	Rescue	OK	0.392919	0.132498	-1.56826	-2.6561	0.0003	0.00855389	yes	2.6561
TCONS_00054575	XLOC_021917	NRG2	chr5:139226363-139422884	KO	Rescue	OK	0.452228	0.18388	-1.29829	-2.65606	0.00025	0.00734573	yes	2.65606
TCONS_00033831	XLOC_013499	ZNF331	chr19:54024176-54083523	KO	Rescue	OK	2.35978	3.74743	0.667247	2.65538	5e-05	0.00179837	yes	2.65538
TCONS_00028588	XLOC_011446	ABR	chr17:906757-1090616	KO	Rescue	OK	14.658	10.8186	-0.438177	-2.65508	5e-05	0.00179837	yes	2.65508
TCONS_00006986	XLOC_002815	ADSS	chr1:244570220-244615436	KO	Rescue	OK	21.1861	28.3867	0.422096	2.6546	5e-05	0.00179837	yes	2.6546
TCONS_00069135	XLOC_028237	FNBP1	chr9:132649455-132805525	KO	Rescue	OK	5.28665	1.72275	-1.61764	-2.65432	0.0001	0.00333804	yes	2.65432
TCONS_00065374	XLOC_026678	PHYHIP	chr8:22077215-22089851	KO	Rescue	OK	1.56852	0.654835	-1.26021	-2.65412	0.0001	0.00333804	yes	2.65412
TCONS_00008011	XLOC_003213	IFIT1	chr10:91152302-91166244	KO	Rescue	OK	4.28241	3.01962	-0.504057	-2.65381	5e-05	0.00179837	yes	2.65381
TCONS_00022040	XLOC_008878	MPI	chr15:75182142-75190855	KO	Rescue	OK	9.98513	14.1935	0.507379	2.65358	5e-05	0.00179837	yes	2.65358
TCONS_00023559	XLOC_009501	SNRPA1	chr15:101821714-101835460	KO	Rescue	OK	154.538	116.121	-0.412334	-2.65345	5e-05	0.00179837	yes	2.65345
TCONS_00072193	XLOC_029468	AVPR2	chrX:153167167-153172620	KO	Rescue	OK	0.434735	0.141792	-1.61636	-2.65301	0.00015	0.00477533	yes	2.65301
TCONS_00009806	XLOC_003878	SH3PXD2A	chr10:105253734-105615164	KO	Rescue	OK	5.51031	2.2698	-1.27957	-2.65171	5e-05	0.00179837	yes	2.65171
TCONS_00034975	XLOC_013971	DNAJB1	chr19:14625581-14629201	KO	Rescue	OK	48.395	64.3875	0.411924	2.65041	5e-05	0.00179837	yes	2.65041
TCONS_00047049	XLOC_018850	ZBTB38	chr3:141043054-141168632	KO	Rescue	OK	7.1148	3.79244	-0.907694	-2.64555	5e-05	0.00179837	yes	2.64555
TCONS_00040491	XLOC_016235	ALS2	chr2:202564985-202645895	KO	Rescue	OK	1.74626	1.17633	-0.569967	-2.64358	5e-05	0.00179837	yes	2.64358
TCONS_00004927	XLOC_001964	JAK1	chr1:65210777-65432187	KO	Rescue	OK	128.541	94.9727	-0.43664	-2.6431	5e-05	0.00179837	yes	2.6431
TCONS_00027621	XLOC_011110	GRN	chr17:42422490-42430476	KO	Rescue	OK	102.113	72.2824	-0.498446	-2.64194	5e-05	0.00179837	yes	2.64194
TCONS_00065128	XLOC_026553	GRINA	chr8:145064225-145067583	KO	Rescue	OK	92.5372	66.9192	-0.467613	-2.63932	5e-05	0.00179837	yes	2.63932
TCONS_00016020	XLOC_006359	FBRSL1	chr12:133066709-133161773	KO	Rescue	OK	7.28372	12.5239	0.781941	2.63695	5e-05	0.00179837	yes	2.63695
TCONS_00046441	XLOC_018590	FLNB	chr3:57994094-58158136	KO	Rescue	OK	13.4488	5.70358	-1.23753	-2.63586	5e-05	0.00179837	yes	2.63586
TCONS_00003153	XLOC_001299	SERTAD4	chr1:210404803-210420157	KO	Rescue	OK	3.97479	2.395	-0.730854	-2.63402	5e-05	0.00179837	yes	2.63402
TCONS_00048423	XLOC_019372	EIF4E3	chr3:71728439-71804328	KO	Rescue	OK	0.623717	0.383793	-0.700563	-2.6321	5e-05	0.00179837	yes	2.6321
TCONS_00006555	XLOC_002635	CYB5R1	chr1:202931000-202936404	KO	Rescue	OK	22.8649	16.9172	-0.434645	-2.62914	5e-05	0.00179837	yes	2.62914
TCONS_00052380	XLOC_021011	SNX18	chr5:53813588-53842416	KO	Rescue	OK	3.80226	2.66751	-0.511366	-2.62843	5e-05	0.00179837	yes	2.62843
TCONS_00045049	XLOC_018098	SEC14L4	chr22:30882819-30901860	KO	Rescue	OK	1.6895	0.703849	-1.26326	-2.62767	5e-05	0.00179837	yes	2.62767
TCONS_00025535	XLOC_010206	CORO7	chr16:4365375-4466962	KO	Rescue	OK	1.3455	4.25235	1.66012	2.62382	0.0001	0.00333804	yes	2.62382
TCONS_00005172	XLOC_002066	F3	chr1:94994731-95007413	KO	Rescue	OK	3.31777	5.3352	0.685328	2.62191	5e-05	0.00179837	yes	2.62191
TCONS_00007174	XLOC_002888	FBXO18	chr10:5902025-5979558	KO	Rescue	OK	6.7648	3.27919	-1.04471	-2.62172	5e-05	0.00179837	yes	2.62172
TCONS_00069841	XLOC_028530	HDAC6	chrX:48659797-48683384	KO	Rescue	OK	0.793395	1.91473	1.27103	2.62157	5e-05	0.00179837	yes	2.62157
TCONS_00034566	XLOC_013819	DENND1C	chr19:6464259-6481798	KO	Rescue	OK	0.124028	0.344101	1.47217	2.62087	0.0003	0.00855389	yes	2.62087
TCONS_00056433	XLOC_022662	FAM229B	chr6:112391859-112423993	KO	Rescue	OK	1.39207	0.550447	-1.33855	-2.62047	0.00015	0.00477533	yes	2.62047
TCONS_00019017	XLOC_007595	RAB20	chr13:111175410-111214109	KO	Rescue	OK	15.3388	21.9245	0.515361	2.62015	5e-05	0.00179837	yes	2.62015
TCONS_00053269	XLOC_021338	PCYOX1L	chr5:148737569-148749221	KO	Rescue	OK	2.04421	1.08528	-0.913484	-2.61996	5e-05	0.00179837	yes	2.61996
TCONS_00069007	XLOC_028192	RPL12	chr9:130209952-130265780	KO	Rescue	OK	1705.15	1272.18	-0.422595	-2.61996	5e-05	0.00179837	yes	2.61996
TCONS_00044562	XLOC_017895	PARVB	chr22:44395090-44565627	KO	Rescue	OK	22.1355	30.1326	0.444964	2.61798	5e-05	0.00179837	yes	2.61798
TCONS_00028162	XLOC_011303	GPRC5C	chr17:72427666-72443568	KO	Rescue	OK	6.66203	4.58278	-0.53974	-2.61529	5e-05	0.00179837	yes	2.61529
TCONS_00049874	XLOC_019959	LIMCH1	chr4:41361416-41702061	KO	Rescue	OK	36.8819	22.461	-0.715492	-2.61483	5e-05	0.00179837	yes	2.61483
TCONS_00007960	XLOC_003189	FAM25A	chr10:88780045-88784487	KO	Rescue	OK	2.44302	0.726475	-1.74968	-2.61405	0.00065	0.0160504	yes	2.61405
TCONS_00005069	XLOC_002031	ZNHIT6	chr1:86115105-86174116	KO	Rescue	OK	9.92109	13.2912	0.4219	2.61337	5e-05	0.00179837	yes	2.61337
TCONS_00034186	XLOC_013656	ZNF274	chr19:58694395-58724927	KO	Rescue	OK	4.91843	7.03466	0.516283	2.61238	5e-05	0.00179837	yes	2.61238
TCONS_00003102	XLOC_001278	PFKFB2	chr1:207226397-207254368	KO	Rescue	OK	8.94111	6.55281	-0.448341	-2.60902	5e-05	0.00179837	yes	2.60902
TCONS_00044700	XLOC_017957	MAPK8IP2	chr22:51038525-51052374	KO	Rescue	OK	1.70924	1.04368	-0.711671	-2.60695	5e-05	0.00179837	yes	2.60695
TCONS_00025234	XLOC_010090	TCF25	chr16:89939292-89987385	KO	Rescue	OK	1.40154	0.370458	-1.91963	-2.6068	0.0002	0.00609992	yes	2.6068
TCONS_00018249	XLOC_007250	SLITRK5	chr13:88096241-88463503	KO	Rescue	OK	0.1039	0.295167	1.50634	2.60521	0.00015	0.00477533	yes	2.60521
TCONS_00004687	XLOC_001871	ERI3	chr1:44686741-44821052	KO	Rescue	OK	23.1722	32.6625	0.495238	2.60457	5e-05	0.00179837	yes	2.60457
TCONS_00041342	XLOC_016606	-	chr20:32723265-32724265	KO	Rescue	OK	0.477145	0.0954373	-2.3218	-2.60307	0.0014	0.0292935	yes	2.60307
TCONS_00065692	XLOC_026812	PDE7A	chr8:66625597-66754791	KO	Rescue	OK	3.25235	1.79717	-0.855758	-2.60258	5e-05	0.00179837	yes	2.60258
TCONS_00020594	XLOC_008270	CDKL1	chr14:50778959-50885178	KO	Rescue	OK	2.12694	3.38787	0.671603	2.60145	5e-05	0.00179837	yes	2.60145
TCONS_00067184	XLOC_027425	TGFBR1	chr9:101866993-101916473	KO	Rescue	OK	57.8764	43.294	-0.418808	-2.59935	5e-05	0.00179837	yes	2.59935
TCONS_00001781	XLOC_000705	GNAT2	chr1:110145888-110160988	KO	Rescue	OK	0.44012	0.253456	-0.79616	-2.59876	5e-05	0.00179837	yes	2.59876
TCONS_00012834	XLOC_005105	CKAP5	chr11:46765083-46867863	KO	Rescue	OK	37.4893	50.76	0.437212	2.59843	5e-05	0.00179837	yes	2.59843
TCONS_00052880	XLOC_021196	-	chr5:121390439-121398869	KO	Rescue	OK	0.236772	0.132102	-0.841844	-2.59747	5e-05	0.00179837	yes	2.59747
TCONS_00021826	XLOC_008792	TLN2	chr15:62682704-63136829	KO	Rescue	OK	0.895316	1.64516	0.877756	2.59665	5e-05	0.00179837	yes	2.59665
TCONS_00025979	XLOC_010431	-	chr16:53076584-53081166	KO	Rescue	OK	0.321402	0.0902549	-1.8323	-2.5953	0.0005	0.0130935	yes	2.5953
TCONS_00016026	XLOC_006359	FBRSL1	chr12:133066709-133161773	KO	Rescue	OK	4.28192	8.88451	1.05303	2.59494	0.0001	0.00333804	yes	2.59494
TCONS_00031937	XLOC_012760	WDR18	chr19:982931-994925	KO	Rescue	OK	29.8858	40.0326	0.421717	2.5945	5e-05	0.00179837	yes	2.5945
TCONS_00009646	XLOC_003824	PYROXD2	chr10:100143321-100175284	KO	Rescue	OK	0.669982	0.261046	-1.35982	-2.59445	5e-05	0.00179837	yes	2.59445
TCONS_00064563	XLOC_026289	LYN	chr8:56792385-56925006	KO	Rescue	OK	11.0449	15.4368	0.482999	2.59408	5e-05	0.00179837	yes	2.59408
TCONS_00065696	XLOC_026815	MYBL1	chr8:67474409-67526787	KO	Rescue	OK	6.41676	4.53007	-0.502313	-2.59224	5e-05	0.00179837	yes	2.59224
TCONS_00010900	XLOC_004331	ZFP91	chr11:58345814-58398974	KO	Rescue	OK	26.8319	39.1645	0.5456	2.59221	5e-05	0.00179837	yes	2.59221
TCONS_00025898	XLOC_010385	PRSS8	chr16:31142753-31147151	KO	Rescue	OK	4.87108	3.38219	-0.526282	-2.59193	5e-05	0.00179837	yes	2.59193
TCONS_00021538	XLOC_008688	VPS18	chr15:41186627-41196173	KO	Rescue	OK	15.9111	11.9481	-0.413249	-2.59048	5e-05	0.00179837	yes	2.59048
TCONS_00071001	XLOC_028994	AP1S2	chrX:15843928-15873137	KO	Rescue	OK	4.19239	6.20464	0.565573	2.58916	5e-05	0.00179837	yes	2.58916
TCONS_00013693	XLOC_005461	C11orf75	chr11:93211636-93276626	KO	Rescue	OK	12.2705	18.3462	0.580289	2.58847	5e-05	0.00179837	yes	2.58847
TCONS_00015919	XLOC_006324	DDX55	chr12:124086671-124105482	KO	Rescue	OK	32.3359	24.1591	-0.42057	-2.58818	5e-05	0.00179837	yes	2.58818
TCONS_00049041	XLOC_019623	LOC730091	chr3:156465117-156534926	KO	Rescue	OK	0.773388	0.407748	-0.923516	-2.58818	5e-05	0.00179837	yes	2.58818
TCONS_00020785	XLOC_008351	ZFP36L1	chr14:69254371-69262960	KO	Rescue	OK	24.5646	18.2133	-0.431591	-2.58711	5e-05	0.00179837	yes	2.58711
TCONS_00008342	XLOC_003342	DUSP5	chr10:112257624-112271302	KO	Rescue	OK	2.64315	1.78559	-0.565859	-2.58452	5e-05	0.00179837	yes	2.58452
TCONS_00048440	XLOC_019379	-	chr3:75766504-75768709	KO	Rescue	OK	0.0886586	0.270528	1.60944	2.58415	0.00025	0.00734573	yes	2.58415
TCONS_00013045	XLOC_005212	MTA2	chr11:62360668-62382592	KO	Rescue	OK	54.538	76.2702	0.483857	2.58392	5e-05	0.00179837	yes	2.58392
TCONS_00050102	XLOC_020074	USO1	chr4:76620032-76735422	KO	Rescue	OK	23.5715	16.6748	-0.499372	-2.58373	5e-05	0.00179837	yes	2.58373
TCONS_00040729	XLOC_016339	SERPINE2	chr2:224839764-224904036	KO	Rescue	OK	4.94672	1.88973	-1.38829	-2.58296	5e-05	0.00179837	yes	2.58296
TCONS_00054721	XLOC_021966	SH3TC2	chr5:148361712-148442746	KO	Rescue	OK	0.315955	0.0638574	-2.30679	-2.58252	0.00045	0.0120882	yes	2.58252
TCONS_00023826	XLOC_009595	-	chr16:2885641-2892752	KO	Rescue	OK	0.324863	0.0899089	-1.8533	-2.58195	0.00055	0.0141432	yes	2.58195
TCONS_00058657	XLOC_023586	LINC00473	chr6:166319586-166403103	KO	Rescue	OK	3.63009	8.31863	1.19634	2.57962	5e-05	0.00179837	yes	2.57962
TCONS_00030416	XLOC_012175	TRIM65	chr17:73885040-73893084	KO	Rescue	OK	14.6123	19.8393	0.441179	2.57954	5e-05	0.00179837	yes	2.57954
TCONS_00069840	XLOC_028530	HDAC6	chrX:48659797-48683384	KO	Rescue	OK	1.36385	2.89543	1.08609	2.57949	5e-05	0.00179837	yes	2.57949
TCONS_00007227	XLOC_002909	OPTN	chr10:13142079-13180342	KO	Rescue	OK	3.98009	2.61459	-0.606216	-2.57576	5e-05	0.00179837	yes	2.57576
TCONS_00013048	XLOC_005214	GANAB	chr11:62392297-62414104	KO	Rescue	OK	125.204	171.26	0.451908	2.57443	5e-05	0.00179837	yes	2.57443
TCONS_00019731	XLOC_007865	PROX2	chr14:75319735-75330537	KO	Rescue	OK	0.547305	0.314781	-0.797997	-2.574	5e-05	0.00179837	yes	2.574
TCONS_00018998	XLOC_007582	EFNB2	chr13:107142078-107187388	KO	Rescue	OK	0.259397	0.124132	-1.06328	-2.57278	0.0001	0.00333804	yes	2.57278
TCONS_00001817	XLOC_000717	SLC6A17	chr1:110693125-110744825	KO	Rescue	OK	0.680031	0.250546	-1.44053	-2.5715	0.0001	0.00333804	yes	2.5715
TCONS_00020218	XLOC_008107	CRIP1	chr14:105948878-105955127	KO	Rescue	OK	322.831	243.847	-0.404805	-2.57031	5e-05	0.00179837	yes	2.57031
TCONS_00032356	XLOC_012918	QTRT1	chr19:10812072-10824043	KO	Rescue	OK	12.4785	18.2116	0.545418	2.56846	5e-05	0.00179837	yes	2.56846
TCONS_00061261	XLOC_024900	-	chr7:39618134-39621665	KO	Rescue	OK	0.323515	0.154909	-1.06241	-2.56657	0.00015	0.00477533	yes	2.56657
TCONS_00008292	XLOC_003322	C10orf32	chr10:104613966-104661655	KO	Rescue	OK	5.75176	3.96422	-0.536968	-2.56314	5e-05	0.00179837	yes	2.56314
TCONS_00030855	XLOC_012339	RAB31	chr18:9708227-9862553	KO	Rescue	OK	42.8453	32.5365	-0.397076	-2.56244	5e-05	0.00179837	yes	2.56244
TCONS_00034130	XLOC_013642	ZNF134	chr19:58125598-58136094	KO	Rescue	OK	0.857477	1.79706	1.06747	2.56164	0.00025	0.00734573	yes	2.56164
TCONS_00052377	XLOC_021010	HSPB3	chr5:53751430-53752214	KO	Rescue	OK	1.66822	0.782493	-1.09216	-2.56089	0.0001	0.00333804	yes	2.56089
TCONS_00004908	XLOC_001956	TM2D1	chr1:62145537-62191095	KO	Rescue	OK	32.7914	24.3213	-0.431099	-2.55897	5e-05	0.00179837	yes	2.55897
TCONS_00040954	XLOC_016439	TRIB3	chr20:361307-378203	KO	Rescue	OK	29.2059	38.5741	0.401373	2.55636	5e-05	0.00179837	yes	2.55636
TCONS_00009974	XLOC_003934	NSMCE4A	chr10:123716602-123734780	KO	Rescue	OK	19.2494	26.7225	0.473243	2.55439	5e-05	0.00179837	yes	2.55439
TCONS_00071746	XLOC_029275	AMMECR1	chrX:109437413-109699562	KO	Rescue	OK	8.13583	5.74781	-0.501278	-2.55337	5e-05	0.00179837	yes	2.55337
TCONS_00032574	XLOC_013014	MYO9B	chr19:17186543-17324104	KO	Rescue	OK	1.09751	0.231382	-2.24588	-2.55015	0.00205	0.0394643	yes	2.55015
TCONS_00013258	XLOC_005287	-	chr11:65759157-65760840	KO	Rescue	OK	0.247497	0.568329	1.19931	2.54895	0.0001	0.00333804	yes	2.54895
TCONS_00056512	XLOC_022697	HINT3	chr6:126277860-126301389	KO	Rescue	OK	10.9514	8.18793	-0.419541	-2.54829	5e-05	0.00179837	yes	2.54829
TCONS_00010404	XLOC_004121	CTR9	chr11:10772810-10801290	KO	Rescue	OK	24.7468	32.5509	0.395456	2.54638	5e-05	0.00179837	yes	2.54638
TCONS_00025885	XLOC_010381	STX1B	chr16:31000576-31021829	KO	Rescue	OK	0.808188	0.46604	-0.794236	-2.54226	5e-05	0.00179837	yes	2.54226
TCONS_00033901	XLOC_013554	CACNG6	chr19:54495541-54515920	KO	Rescue	OK	0.328968	0.078937	-2.05917	-2.54195	0.0024	0.0443833	yes	2.54195
TCONS_00008699	XLOC_003482	SFMBT2	chr10:7200585-7453448	KO	Rescue	OK	1.09667	3.14661	1.52067	2.5419	5e-05	0.00179837	yes	2.5419
TCONS_00008730	XLOC_003495	PHYH	chr10:13319795-13342130	KO	Rescue	OK	9.12557	6.54654	-0.479182	-2.5354	5e-05	0.00179837	yes	2.5354
TCONS_00018274	XLOC_007260	GPC5	chr13:92050858-93519487	KO	Rescue	OK	0.652133	1.72557	1.40384	2.53493	5e-05	0.00179837	yes	2.53493
TCONS_00034867	XLOC_013938	-	chr19:12793486-12794383	KO	Rescue	OK	0.103994	0.472417	2.18355	2.53455	0.0019	0.0372657	yes	2.53455
TCONS_00031216	XLOC_012465	TNFRSF11A	chr18:59992508-60055347	KO	Rescue	OK	1.29784	0.777512	-0.739175	-2.53197	5e-05	0.00179837	yes	2.53197
TCONS_00052067	XLOC_020874	AHRR	chr5:271513-438533	KO	Rescue	OK	0.681382	3.82558	2.48914	2.53153	0.00095	0.0216666	yes	2.53153
TCONS_00047019	XLOC_018841	FAIM	chr3:138327541-138352213	KO	Rescue	OK	25.8241	35.9983	0.479214	2.53127	5e-05	0.00179837	yes	2.53127
TCONS_00035977	XLOC_014399	RRAS	chr19:50138551-50143400	KO	Rescue	OK	17.4078	12.592	-0.467228	-2.53104	5e-05	0.00179837	yes	2.53104
TCONS_00052725	XLOC_021136	ANKRD32	chr5:93486555-94620279	KO	Rescue	OK	12.7339	19.399	0.607304	2.52952	5e-05	0.00179837	yes	2.52952
TCONS_00054583	XLOC_021919	-	chr5:139482678-139485345	KO	Rescue	OK	1.37025	0.732811	-0.902921	-2.52839	0.0001	0.00333804	yes	2.52839
TCONS_00065599	XLOC_026770	CEBPD	chr8:48173356-48651602	KO	Rescue	OK	23.8301	38.2094	0.681143	2.5263	5e-05	0.00179837	yes	2.5263
TCONS_00012519	XLOC_004979	SBF2	chr11:9776142-10315785	KO	Rescue	OK	5.43175	7.56115	0.477191	2.52619	5e-05	0.00179837	yes	2.52619
TCONS_00052485	XLOC_021048	MAST4	chr5:65892175-66465423	KO	Rescue	OK	0.648833	0.246552	-1.39596	-2.52408	0.0001	0.00333804	yes	2.52408
TCONS_00058005	XLOC_023321	FAM46A	chr6:82455305-82462505	KO	Rescue	OK	18.6432	24.7544	0.409037	2.52371	5e-05	0.00179837	yes	2.52371
TCONS_00045376	XLOC_018224	RRP7A	chr22:42896584-42915829	KO	Rescue	OK	13.7686	18.1156	0.39585	2.52099	5e-05	0.00179837	yes	2.52099
TCONS_00070557	XLOC_028820	-	chrX:133658050-133659934	KO	Rescue	OK	0.319653	0.6515	1.02726	2.52077	5e-05	0.00179837	yes	2.52077
TCONS_00063831	XLOC_025970	SVOPL	chr7:138276517-138386145	KO	Rescue	OK	2.98142	6.56699	1.13923	2.51828	5e-05	0.00179837	yes	2.51828
TCONS_00062052	XLOC_025207	MDFIC	chr7:114562208-114659970	KO	Rescue	OK	4.10554	5.51901	0.42684	2.51775	5e-05	0.00179837	yes	2.51775
TCONS_00015220	XLOC_006028	MYL6	chr12:56543569-56555401	KO	Rescue	OK	341.264	218.052	-0.646215	-2.51717	5e-05	0.00179837	yes	2.51717
TCONS_00013780	XLOC_005499	CASP4	chr11:104813593-104839325	KO	Rescue	OK	3.53926	5.24303	0.566954	2.51706	5e-05	0.00179837	yes	2.51706
TCONS_00015589	XLOC_006189	-	chr12:102599761-102604850	KO	Rescue	OK	0.127369	0.252428	0.986864	2.51661	5e-05	0.00179837	yes	2.51661
TCONS_00009072	XLOC_003606	LINC00842	chr10:47096453-47153504	KO	Rescue	OK	3.90752	6.30416	0.690052	2.51552	0.0001	0.00333804	yes	2.51552
TCONS_00046688	XLOC_018695	PHLDB2	chr3:111393503-111695364	KO	Rescue	OK	10.6885	4.88712	-1.129	-2.51373	0.00055	0.0141432	yes	2.51373
TCONS_00058549	XLOC_023517	RMND1	chr6:151725896-151773316	KO	Rescue	OK	12.6082	9.03136	-0.481351	-2.51339	5e-05	0.00179837	yes	2.51339
TCONS_00023032	XLOC_009295	PDCD7	chr15:65409716-65426174	KO	Rescue	OK	9.75926	13.0025	0.413947	2.51177	5e-05	0.00179837	yes	2.51177
TCONS_00063543	XLOC_025843	RASA4	chr7:102220092-102257205	KO	Rescue	OK	1.12481	0.756211	-0.572823	-2.5115	5e-05	0.00179837	yes	2.5115
TCONS_00032917	XLOC_013137	FXYD1	chr19:35629731-35633954	KO	Rescue	OK	1.91478	0.755872	-1.34097	-2.51014	0.00015	0.00477533	yes	2.51014
TCONS_00006424	XLOC_002580	FAM129A	chr1:184760165-184943682	KO	Rescue	OK	13.4615	10.249	-0.393359	-2.50987	5e-05	0.00179837	yes	2.50987
TCONS_00004406	XLOC_001761	MARCKSL1	chr1:32799429-32801840	KO	Rescue	OK	92.2975	120.89	0.389327	2.50936	5e-05	0.00179837	yes	2.50936
TCONS_00032402	XLOC_012931	LPPR2	chr19:11465830-11476374	KO	Rescue	OK	6.56977	4.20731	-0.642945	-2.50633	5e-05	0.00179837	yes	2.50633
TCONS_00012350	XLOC_004897	RHOG	chr11:3848207-3862213	KO	Rescue	OK	31.2982	41.4255	0.404436	2.50591	5e-05	0.00179837	yes	2.50591
TCONS_00062056	XLOC_025209	CAV2	chr7:116139368-116148598	KO	Rescue	OK	23.7568	17.9834	-0.401675	-2.50405	5e-05	0.00179837	yes	2.50405
TCONS_00064054	XLOC_026078	ESYT2	chr7:158523644-158622319	KO	Rescue	OK	16.4224	23.4727	0.515313	2.50363	5e-05	0.00179837	yes	2.50363
TCONS_00064170	XLOC_026139	SLC7A2	chr8:17354518-17428077	KO	Rescue	OK	0.132799	0.625956	2.23682	2.50293	5e-05	0.00179837	yes	2.50293
TCONS_00007728	XLOC_003106	HKDC1	chr10:70980058-71027315	KO	Rescue	OK	0.660105	0.220619	-1.58114	-2.50135	0.0006	0.0150866	yes	2.50135
TCONS_00022830	XLOC_009216	HDC	chr15:50534048-50558162	KO	Rescue	OK	0.534084	0.151032	-1.82221	-2.50037	0.0006	0.0150866	yes	2.50037
TCONS_00011842	XLOC_004710	PTS	chr11:112096774-112105355	KO	Rescue	OK	61.4861	46.3962	-0.406252	-2.49963	5e-05	0.00179837	yes	2.49963
TCONS_00011631	XLOC_004607	-	chr11:81350249-81350566	KO	Rescue	OK	3.68155	7.45024	1.01697	2.49888	0.0001	0.00333804	yes	2.49888
TCONS_00048447	XLOC_019380	ZNF717	chr3:75779120-75834726	KO	Rescue	OK	0.151193	0.370722	1.29395	2.4986	0.00025	0.00734573	yes	2.4986
TCONS_00067955	XLOC_027704	EHMT1	chr9:140500089-140730578	KO	Rescue	OK	2.34486	6.40265	1.44917	2.49759	5e-05	0.00179837	yes	2.49759
TCONS_00070477	XLOC_028786	ZBTB33	chrX:119384606-119392251	KO	Rescue	OK	7.47103	10.2256	0.452809	2.49753	5e-05	0.00179837	yes	2.49753
TCONS_00030610	XLOC_012245	NPLOC4	chr17:79523910-79604181	KO	Rescue	OK	8.30081	1.83444	-2.17791	-2.49607	0.0012	0.025911	yes	2.49607
TCONS_00045611	XLOC_018294	BHLHE40	chr3:5020189-5026865	KO	Rescue	OK	15.0612	11.3501	-0.408135	-2.49468	5e-05	0.00179837	yes	2.49468
TCONS_00024854	XLOC_009949	TANGO6	chr16:68877438-69121509	KO	Rescue	OK	1.35557	0.49068	-1.46604	-2.49188	5e-05	0.00179837	yes	2.49188
TCONS_00056416	XLOC_022653	-	chr6:111350995-111354530	KO	Rescue	OK	0.270647	0.124343	-1.12209	-2.49149	0.0002	0.00609992	yes	2.49149
TCONS_00043133	XLOC_017311	SLC37A1	chr21:43919741-44001550	KO	Rescue	OK	2.18524	1.03663	-1.07588	-2.49047	0.0003	0.00855389	yes	2.49047
TCONS_00027200	XLOC_010921	ANKRD13B	chr17:27920013-27949925	KO	Rescue	OK	6.56333	11.0622	0.753135	2.48995	0.0001	0.00333804	yes	2.48995
TCONS_00067855	XLOC_027669	EGFL7	chr9:139553307-139567130	KO	Rescue	OK	6.11158	8.76466	0.520153	2.4879	5e-05	0.00179837	yes	2.4879
TCONS_00024654	XLOC_009895	USB1	chr16:58035276-58055527	KO	Rescue	OK	69.7813	52.8786	-0.400157	-2.48789	5e-05	0.00179837	yes	2.48789
TCONS_00001870	XLOC_000739	CTTNBP2NL	chr1:112938723-113005204	KO	Rescue	OK	6.54429	8.91003	0.445193	2.48769	5e-05	0.00179837	yes	2.48769
TCONS_00038570	XLOC_015455	COPS7B	chr2:232651161-232673464	KO	Rescue	OK	13.3447	18.0494	0.435684	2.48585	5e-05	0.00179837	yes	2.48585
TCONS_00007665	XLOC_003081	ARID5B	chr10:63660963-63856750	KO	Rescue	OK	4.72103	2.55564	-0.885413	-2.48149	0.0001	0.00333804	yes	2.48149
TCONS_00028934	XLOC_011557	HES7	chr17:8023907-8027410	KO	Rescue	OK	3.73624	5.49624	0.556857	2.48111	5e-05	0.00179837	yes	2.48111
TCONS_00043237	XLOC_017359	DNMT3L	chr21:45663342-45682099	KO	Rescue	OK	0.31316	0.855749	1.45029	2.48111	0.0005	0.0130935	yes	2.48111
TCONS_00052288	XLOC_020971	OSMR	chr5:38796557-38935806	KO	Rescue	OK	15.0873	10.8857	-0.470905	-2.48029	5e-05	0.00179837	yes	2.48029
TCONS_00009751	XLOC_003860	NPM3	chr10:103529886-103543173	KO	Rescue	OK	59.9287	78.9366	0.397448	2.47961	5e-05	0.00179837	yes	2.47961
TCONS_00029595	XLOC_011845	KRT17	chr17:39775688-39781015	KO	Rescue	OK	16.1553	6.31832	-1.35439	-2.47639	5e-05	0.00179837	yes	2.47639
TCONS_00053769	XLOC_021573	-	chr5:24253242-24272124	KO	Rescue	OK	4.67445	3.56285	-0.391767	-2.47533	5e-05	0.00179837	yes	2.47533
TCONS_00032838	XLOC_013112	NUDT19	chr19:33182866-33204702	KO	Rescue	OK	20.0207	26.2518	0.390922	2.47465	5e-05	0.00179837	yes	2.47465
TCONS_00065264	XLOC_026627	SGK223	chr8:8175257-8244157	KO	Rescue	OK	3.85503	2.48446	-0.633807	-2.47457	5e-05	0.00179837	yes	2.47457
TCONS_00011602	XLOC_004595	-	chr11:76511303-76515556	KO	Rescue	OK	0.209546	0.382015	0.86636	2.47439	5e-05	0.00179837	yes	2.47439
TCONS_00056491	XLOC_022689	SMPDL3A	chr6:123109970-123130864	KO	Rescue	OK	1.01106	0.518628	-0.963099	-2.47376	0.0002	0.00609992	yes	2.47376
TCONS_00068916	XLOC_028161	TTLL11	chr9:124582164-124855885	KO	Rescue	OK	0.244283	0.624661	1.35452	2.47365	0.0006	0.0150866	yes	2.47365
TCONS_00030690	XLOC_012270	SECTM1	chr17:80278899-80291921	KO	Rescue	OK	5.93136	3.96841	-0.5798	-2.47233	5e-05	0.00179837	yes	2.47233
TCONS_00003874	XLOC_001564	NOL9	chr1:6581303-6614658	KO	Rescue	OK	8.108	10.7333	0.40467	2.47077	5e-05	0.00179837	yes	2.47077
TCONS_00065010	XLOC_026517	CHRAC1	chr8:141521396-141527252	KO	Rescue	OK	35.5006	47.4253	0.417815	2.46944	5e-05	0.00179837	yes	2.46944
TCONS_00055895	XLOC_022431	CDKN1A	chr6:36644236-36655116	KO	Rescue	OK	1.99457	0.400341	-2.31677	-2.46837	0.00195	0.0380719	yes	2.46837
TCONS_00044896	XLOC_018036	ZNF280B	chr22:22838771-22863505	KO	Rescue	OK	0.230891	0.412197	0.836124	2.46783	0.0001	0.00333804	yes	2.46783
TCONS_00043692	XLOC_017547	TMPRSS3	chr21:43791971-43816955	KO	Rescue	OK	2.04119	0.820383	-1.31504	-2.46581	5e-05	0.00179837	yes	2.46581
TCONS_00053227	XLOC_021316	ARHGAP26	chr5:142149767-142608572	KO	Rescue	OK	3.92439	2.1927	-0.839761	-2.46573	5e-05	0.00179837	yes	2.46573
TCONS_00046510	XLOC_018617	-	chr3:69065491-69067934	KO	Rescue	OK	0.219883	0.0733149	-1.58456	-2.46354	0.00065	0.0160504	yes	2.46354
TCONS_00041174	XLOC_016526	DTD1	chr20:18568555-18744560	KO	Rescue	OK	23.3626	30.9123	0.403978	2.46328	5e-05	0.00179837	yes	2.46328
TCONS_00039765	XLOC_015944	TGFBRAP1	chr2:105880843-105946690	KO	Rescue	OK	3.74369	5.66093	0.596579	2.46256	5e-05	0.00179837	yes	2.46256
TCONS_00012928	XLOC_005156	SSRP1	chr11:57093458-57103351	KO	Rescue	OK	205.69	269.058	0.387446	2.46248	5e-05	0.00179837	yes	2.46248
TCONS_00045125	XLOC_018130	-	chr22:35937351-35983768	KO	Rescue	OK	0.0937266	0.502546	2.42272	2.46194	0.00165	0.0332947	yes	2.46194
TCONS_00038937	XLOC_015592	HS1BP3	chr2:20817563-20850904	KO	Rescue	OK	3.52718	2.3855	-0.564223	-2.46087	5e-05	0.00179837	yes	2.46087
TCONS_00050667	XLOC_020292	PALLD	chr4:169418216-169849655	KO	Rescue	OK	36.3846	24.8903	-0.547748	-2.46046	5e-05	0.00179837	yes	2.46046
TCONS_00022321	XLOC_009012	LOC100507217	chr15:93426072-93441977	KO	Rescue	OK	15.7669	22.5215	0.514398	2.45975	5e-05	0.00179837	yes	2.45975
TCONS_00011448	XLOC_004543	NADSYN1	chr11:71164216-71232184	KO	Rescue	OK	0.996223	0.170735	-2.54471	-2.45924	0.00155	0.0316751	yes	2.45924
TCONS_00048515	XLOC_019415	CD47	chr3:107761940-107809935	KO	Rescue	OK	0.788114	0.216928	-1.86119	-2.45865	0.00055	0.0141432	yes	2.45865
TCONS_00056944	XLOC_022896	-	chr6:3908750-3913874	KO	Rescue	OK	0.216661	0.0420193	-2.36632	-2.45806	0.00075	0.0180567	yes	2.45806
TCONS_00056019	XLOC_022479	SRF	chr6:43138919-43149244	KO	Rescue	OK	21.0524	16.1036	-0.386603	-2.45788	5e-05	0.00179837	yes	2.45788
TCONS_00064800	XLOC_026412	MATN2	chr8:98881310-99048946	KO	Rescue	OK	2.45655	1.08715	-1.17609	-2.4569	0.00015	0.00477533	yes	2.4569
TCONS_00070620	XLOC_028845	-	chrX:136000368-136003609	KO	Rescue	OK	0.132992	0.287899	1.11422	2.45573	0.0001	0.00333804	yes	2.45573
TCONS_00023217	XLOC_009356	CYP11A1	chr15:74630085-74660081	KO	Rescue	OK	1.97681	1.14995	-0.781602	-2.45513	5e-05	0.00179837	yes	2.45513
TCONS_00030877	XLOC_012350	TUBB6	chr18:12307630-12326717	KO	Rescue	OK	140.142	107.286	-0.385424	-2.45467	5e-05	0.00179837	yes	2.45467
TCONS_00071156	XLOC_029046	RPGR	chrX:38128422-38186788	KO	Rescue	OK	1.08241	2.57222	1.24876	2.45436	0.00105	0.0235431	yes	2.45436
TCONS_00039125	XLOC_015671	-	chr2:38347519-38349757	KO	Rescue	OK	0.31844	0.125776	-1.34017	-2.45365	5e-05	0.00179837	yes	2.45365
TCONS_00054028	XLOC_021687	-	chr5:60545425-60548716	KO	Rescue	OK	0.427162	0.150203	-1.50787	-2.45115	0.00035	0.00974863	yes	2.45115
TCONS_00010632	XLOC_004221	PRR5L	chr11:36317724-36498243	KO	Rescue	OK	1.65841	0.515273	-1.68639	-2.45043	0.0001	0.00333804	yes	2.45043
TCONS_00006029	XLOC_002401	BCAN	chr1:156607625-156629324	KO	Rescue	OK	3.7981	5.19805	0.452692	2.44948	5e-05	0.00179837	yes	2.44948
TCONS_00015509	XLOC_006159	AMDHD1	chr12:96336855-96362370	KO	Rescue	OK	0.544061	0.236517	-1.20183	-2.44822	0.0001	0.00333804	yes	2.44822
TCONS_00010842	XLOC_004311	P2RX3	chr11:57105840-57141720	KO	Rescue	OK	0.586452	0.912477	0.637774	2.44749	5e-05	0.00179837	yes	2.44749
TCONS_00006829	XLOC_002753	WNT9A	chr1:228106359-228135697	KO	Rescue	OK	2.93654	2.10447	-0.480662	-2.44697	5e-05	0.00179837	yes	2.44697
TCONS_00062189	XLOC_025269	CPA4	chr7:129932973-129964020	KO	Rescue	OK	46.3269	35.5667	-0.381322	-2.44626	5e-05	0.00179837	yes	2.44626
TCONS_00004426	XLOC_001770	TMEM54	chr1:33352097-33366953	KO	Rescue	OK	2.62034	1.56093	-0.747351	-2.44462	5e-05	0.00179837	yes	2.44462
TCONS_00039898	XLOC_016006	-	chr2:120992870-121003669	KO	Rescue	OK	0.134521	0.311324	1.21059	2.44413	0.00025	0.00734573	yes	2.44413
TCONS_00046836	XLOC_018771	EEFSEC	chr3:127866875-128128159	KO	Rescue	OK	1.22558	0.264947	-2.2097	-2.44362	0.0022	0.0415626	yes	2.44362
TCONS_00062061	XLOC_025210	CAV1	chr7:116164838-116201239	KO	Rescue	OK	49.3649	34.5174	-0.516161	-2.44344	5e-05	0.00179837	yes	2.44344
TCONS_00007691	XLOC_003094	MYPN	chr10:69864710-69983338	KO	Rescue	OK	30.4369	19.4517	-0.645924	-2.44291	5e-05	0.00179837	yes	2.44291
TCONS_00002826	XLOC_001159	IER5	chr1:181057637-181061912	KO	Rescue	OK	19.4362	14.7195	-0.401014	-2.44192	5e-05	0.00179837	yes	2.44192
TCONS_00057437	XLOC_023081	HSPA1L	chr6:31777395-31782835	KO	Rescue	OK	0.81056	1.28111	0.660401	2.4419	5e-05	0.00179837	yes	2.4419
TCONS_00022317	XLOC_009008	SLCO3A1	chr15:92396387-92715665	KO	Rescue	OK	3.4421	6.70701	0.96238	2.44054	0.00015	0.00477533	yes	2.44054
TCONS_00067984	XLOC_027728	-	chr9:2764361-2776887	KO	Rescue	OK	0.343456	0.49945	0.540216	2.44054	5e-05	0.00179837	yes	2.44054
TCONS_00028189	XLOC_011316	SLC16A5	chr17:73083686-73103553	KO	Rescue	OK	1.12305	0.396783	-1.501	-2.43953	0.00055	0.0141432	yes	2.43953
TCONS_00003043	XLOC_001252	MDM4	chr1:204485506-204527250	KO	Rescue	OK	2.41948	3.75291	0.633313	2.43931	5e-05	0.00179837	yes	2.43931
TCONS_00042950	XLOC_017236	BACH1	chr21:30671219-30735591	KO	Rescue	OK	6.18949	4.40956	-0.489184	-2.43889	5e-05	0.00179837	yes	2.43889
TCONS_00053228	XLOC_021316	ARHGAP26	chr5:142149767-142608572	KO	Rescue	OK	0.707463	1.63755	1.21081	2.43835	0.00065	0.0160504	yes	2.43835
TCONS_00054922	XLOC_022051	BOD1	chr5:173030723-173043697	KO	Rescue	OK	18.6249	24.9278	0.420524	2.43834	5e-05	0.00179837	yes	2.43834
TCONS_00016133	XLOC_006396	-	chr12:5668190-5669230	KO	Rescue	OK	0.475123	0.130931	-1.85949	-2.43816	0.0008	0.0189292	yes	2.43816
TCONS_00023686	XLOC_009547	CACNA1H	chr16:1203127-1275254	KO	Rescue	OK	0.673164	0.224064	-1.58705	-2.43768	0.0001	0.00333804	yes	2.43768
TCONS_00029445	XLOC_011761	-	chr17:36837675-36838378	KO	Rescue	OK	1.11387	0.428469	-1.37832	-2.43742	0.00045	0.0120882	yes	2.43742
TCONS_00034527	XLOC_013800	DUS3L	chr19:5782969-5791249	KO	Rescue	OK	15.0491	20.8046	0.467224	2.43552	5e-05	0.00179837	yes	2.43552
TCONS_00001023	XLOC_000418	PTPRF	chr1:43996485-44089421	KO	Rescue	OK	3.89098	0.94238	-2.04575	-2.43533	0.00085	0.0199166	yes	2.43533
TCONS_00036373	XLOC_014565	ZNF416	chr19:58082933-58090243	KO	Rescue	OK	1.04871	2.04094	0.960622	2.43421	0.0002	0.00609992	yes	2.43421
TCONS_00010569	XLOC_004195	LINC00294	chr11:33097695-33101000	KO	Rescue	OK	6.92753	5.17264	-0.421441	-2.43317	5e-05	0.00179837	yes	2.43317
TCONS_00051658	XLOC_020707	SCLT1	chr4:129805150-130014764	KO	Rescue	OK	4.50803	2.77955	-0.697648	-2.4307	0.0001	0.00333804	yes	2.4307
TCONS_00066479	XLOC_027140	DOCK8	chr9:213107-465259	KO	Rescue	OK	0.345103	0.181338	-0.928348	-2.43049	5e-05	0.00179837	yes	2.43049
TCONS_00035848	XLOC_014344	MEIS3	chr19:47906374-47922789	KO	Rescue	OK	3.17891	1.57343	-1.01462	-2.43035	5e-05	0.00179837	yes	2.43035
TCONS_00051844	XLOC_020790	DDX60	chr4:169137441-169239958	KO	Rescue	OK	2.11089	1.40927	-0.582902	-2.43002	0.0002	0.00609992	yes	2.43002
TCONS_00053930	XLOC_021644	LOC648987	chr5:43014830-43018913	KO	Rescue	OK	2.32894	3.40757	0.549068	2.42947	5e-05	0.00179837	yes	2.42947
TCONS_00046389	XLOC_018576	PRKCD	chr3:53195222-53226733	KO	Rescue	OK	2.88422	5.12536	0.829472	2.42938	5e-05	0.00179837	yes	2.42938
TCONS_00069499	XLOC_028383	STS	chrX:6966960-7272682	KO	Rescue	OK	4.31055	2.56	-0.751727	-2.42893	5e-05	0.00179837	yes	2.42893
TCONS_00058707	XLOC_023613	PHF10	chr6:170102206-170124616	KO	Rescue	OK	4.88441	10.3198	1.07915	2.42519	0.0001	0.00333804	yes	2.42519
TCONS_00040663	XLOC_016312	-	chr2:220232721-220234774	KO	Rescue	OK	0.804901	0.445203	-0.854347	-2.42331	5e-05	0.00179837	yes	2.42331
TCONS_00034089	XLOC_013631	-	chr19:57849954-57852465	KO	Rescue	OK	0.294029	0.123019	-1.25707	-2.42197	0.00055	0.0141432	yes	2.42197
TCONS_00066109	XLOC_026987	FBXO32	chr8:124510126-124553949	KO	Rescue	OK	0.389179	0.198149	-0.973851	-2.42172	5e-05	0.00179837	yes	2.42172
TCONS_00054301	XLOC_021807	FBXL17	chr5:107194733-107717799	KO	Rescue	OK	3.52877	2.61738	-0.431041	-2.4199	5e-05	0.00179837	yes	2.4199
TCONS_00067788	XLOC_027646	COL5A1	chr9:137533651-137736688	KO	Rescue	OK	49.3729	38.0587	-0.375492	-2.41839	5e-05	0.00179837	yes	2.41839
TCONS_00053572	XLOC_021468	SQSTM1	chr5:179224597-179285846	KO	Rescue	OK	224.052	164.182	-0.448539	-2.41433	5e-05	0.00179837	yes	2.41433
TCONS_00048388	XLOC_019362	SUCLG2	chr3:67291178-67705038	KO	Rescue	OK	64.0107	49.2991	-0.376752	-2.41299	5e-05	0.00179837	yes	2.41299
TCONS_00056453	XLOC_022672	RWDD1	chr6:116892340-116954148	KO	Rescue	OK	9.78084	4.19511	-1.22125	-2.41198	0.00055	0.0141432	yes	2.41198
TCONS_00037477	XLOC_015032	BCL2L11	chr2:111878490-111926153	KO	Rescue	OK	0.911914	2.54282	1.47946	2.41124	0.00155	0.0316751	yes	2.41124
TCONS_00016741	XLOC_006640	LIMA1	chr12:50569552-50677353	KO	Rescue	OK	10.4582	1.75557	-2.57463	-2.41096	0.00095	0.0216666	yes	2.41096
TCONS_00039162	XLOC_015688	-	chr2:42158748-42161765	KO	Rescue	OK	5.4687	2.1585	-1.34117	-2.40998	5e-05	0.00179837	yes	2.40998
TCONS_00016298	XLOC_006459	KLRC2	chr12:10515607-10590352	KO	Rescue	OK	2.15599	0.683576	-1.65718	-2.40943	0.0008	0.0189292	yes	2.40943
TCONS_00063364	XLOC_025774	PDK4	chr7:95212808-95225925	KO	Rescue	OK	3.58025	2.61539	-0.453034	-2.40866	5e-05	0.00179837	yes	2.40866
TCONS_00052811	XLOC_021163	WDR36	chr5:110427869-110466200	KO	Rescue	OK	14.6666	19.0139	0.374519	2.40736	5e-05	0.00179837	yes	2.40736
TCONS_00026409	XLOC_010604	HSDL1	chr16:84155743-84178800	KO	Rescue	OK	5.59679	7.50776	0.423781	2.40704	5e-05	0.00179837	yes	2.40704
TCONS_00010322	XLOC_004086	SMPD1	chr11:6411643-6416228	KO	Rescue	OK	6.43608	4.3864	-0.553143	-2.40461	5e-05	0.00179837	yes	2.40461
TCONS_00042856	XLOC_017186	MIR3648	chr21:9825435-9827839	KO	Rescue	OK	450.705	596.66	0.404726	2.40288	5e-05	0.00179837	yes	2.40288
TCONS_00046865	XLOC_018791	COPG1	chr3:128968452-128996616	KO	Rescue	OK	93.7056	72.4386	-0.371376	-2.40214	0.0001	0.00333804	yes	2.40214
TCONS_00072190	XLOC_029466	L1CAM	chrX:153126851-153151942	KO	Rescue	OK	62.4844	46.3954	-0.429514	-2.40194	5e-05	0.00179837	yes	2.40194
TCONS_00034271	XLOC_013695	PPAP2C	chr19:281043-291435	KO	Rescue	OK	48.0871	63.3288	0.397214	2.39992	5e-05	0.00179837	yes	2.39992
TCONS_00056060	XLOC_022492	VEGFA	chr6:43737418-43754223	KO	Rescue	OK	1.25362	3.44815	1.45972	2.39873	0.0005	0.0130935	yes	2.39873
TCONS_00058582	XLOC_023533	SERAC1	chr6:158530535-158589312	KO	Rescue	OK	1.39206	0.926119	-0.58795	-2.39739	5e-05	0.00179837	yes	2.39739
TCONS_00068144	XLOC_027808	MOB3B	chr9:27325205-27529850	KO	Rescue	OK	9.62934	12.716	0.401134	2.39652	5e-05	0.00179837	yes	2.39652
TCONS_00026868	XLOC_010792	-	chr17:8374372-8377515	KO	Rescue	OK	0.260811	0.475103	0.865237	2.39625	5e-05	0.00179837	yes	2.39625
TCONS_00012933	XLOC_005158	PRG2	chr11:57154833-57168107	KO	Rescue	OK	0.325186	0.676472	1.05677	2.39617	0.0002	0.00609992	yes	2.39617
TCONS_00033002	XLOC_013164	APLP1	chr19:36359400-36370699	KO	Rescue	OK	5.8187	3.41255	-0.769847	-2.39525	0.00055	0.0141432	yes	2.39525
TCONS_00007223	XLOC_002909	OPTN	chr10:13142079-13180342	KO	Rescue	OK	0.89514	0.251015	-1.83434	-2.39488	0.00025	0.00734573	yes	2.39488
TCONS_00068028	XLOC_027753	GLDC	chr9:6532463-6645692	KO	Rescue	OK	0.228639	0.105786	-1.11192	-2.39459	0.0003	0.00855389	yes	2.39459
TCONS_00055768	XLOC_022389	PSMB9	chr6:32821937-32827628	KO	Rescue	OK	2.96652	1.85254	-0.679266	-2.39207	5e-05	0.00179837	yes	2.39207
TCONS_00003691	XLOC_001520	MXRA8	chr1:1286790-1293915	KO	Rescue	OK	0.730429	0.328399	-1.15329	-2.39113	0.00025	0.00734573	yes	2.39113
TCONS_00051340	XLOC_020587	PLAC8	chr4:84007120-84036016	KO	Rescue	OK	41.31	25.7545	-0.681665	-2.38947	0.0001	0.00333804	yes	2.38947
TCONS_00014010	XLOC_005583	TRIM29	chr11:119981991-120008863	KO	Rescue	OK	28.8597	20.3961	-0.500763	-2.38831	5e-05	0.00179837	yes	2.38831
TCONS_00006524	XLOC_002620	PHLDA3	chr1:201433524-201438855	KO	Rescue	OK	20.3892	14.9082	-0.4517	-2.3874	5e-05	0.00179837	yes	2.3874
TCONS_00032904	XLOC_013134	SCN1B	chr19:35521591-35531353	KO	Rescue	OK	6.42715	4.55368	-0.497145	-2.38689	5e-05	0.00179837	yes	2.38689
TCONS_00020497	XLOC_008220	SPTSSA	chr14:34902143-34931468	KO	Rescue	OK	35.9251	27.7055	-0.374818	-2.38546	5e-05	0.00179837	yes	2.38546
TCONS_00013255	XLOC_005285	FOSL1	chr11:65657688-65668026	KO	Rescue	OK	2.66587	6.35273	1.25277	2.38492	0.0006	0.0150866	yes	2.38492
TCONS_00015943	XLOC_006331	BRI3BP	chr12:125478164-125515908	KO	Rescue	OK	31.5219	24.1343	-0.385271	-2.38469	5e-05	0.00179837	yes	2.38469
TCONS_00007299	XLOC_002938	ARL5B	chr10:18948288-18970570	KO	Rescue	OK	9.28817	12.1259	0.384625	2.38413	5e-05	0.00179837	yes	2.38413
TCONS_00053613	XLOC_021488	TRIM41	chr5:180650262-180662808	KO	Rescue	OK	11.5281	15.826	0.457138	2.38308	5e-05	0.00179837	yes	2.38308
TCONS_00064427	XLOC_026226	ZNF703	chr8:37552987-37557540	KO	Rescue	OK	4.17852	2.83366	-0.560328	-2.3829	0.00035	0.00974863	yes	2.3829
TCONS_00024776	XLOC_009921	SLC9A5	chr16:67282854-67306094	KO	Rescue	OK	0.24692	0.0921032	-1.42272	-2.38263	0.00015	0.00477533	yes	2.38263
TCONS_00017176	XLOC_006805	PHLDA1	chr12:76419226-76425556	KO	Rescue	OK	0.937969	1.32287	0.496064	2.38214	0.00025	0.00734573	yes	2.38214
TCONS_00056939	XLOC_022892	SLC22A23	chr6:3269204-3456793	KO	Rescue	OK	1.53328	0.873321	-0.812037	-2.38212	0.00025	0.00734573	yes	2.38212
TCONS_00068637	XLOC_028043	PTCH1	chr9:98205263-98279247	KO	Rescue	OK	0.752926	1.47656	0.971661	2.38123	5e-05	0.00179837	yes	2.38123
TCONS_00011870	XLOC_004721	NNMT	chr11:114165700-114184345	KO	Rescue	OK	41.3192	31.205	-0.405036	-2.3811	5e-05	0.00179837	yes	2.3811
TCONS_00030833	XLOC_012332	PTPRM	chr18:7567313-8406859	KO	Rescue	OK	1.46198	0.947992	-0.624979	-2.38078	5e-05	0.00179837	yes	2.38078
TCONS_00045074	XLOC_018110	PLA2G3	chr22:31530792-31536509	KO	Rescue	OK	1.53273	0.746187	-1.0385	-2.38071	0.00015	0.00477533	yes	2.38071
TCONS_00014540	XLOC_005769	GABARAPL1	chr12:10365121-10375732	KO	Rescue	OK	52.2284	39.6371	-0.397984	-2.38008	5e-05	0.00179837	yes	2.38008
TCONS_00052098	XLOC_020880	-	chr5:784962-786456	KO	Rescue	OK	0.764702	0.336895	-1.1826	-2.37978	0.0002	0.00609992	yes	2.37978
TCONS_00011730	XLOC_004658	ENDOD1	chr11:94822973-94865815	KO	Rescue	OK	5.1754	6.81052	0.396096	2.37885	5e-05	0.00179837	yes	2.37885
TCONS_00044278	XLOC_017776	SMTN	chr22:31477281-31500612	KO	Rescue	OK	9.88177	7.31947	-0.433029	-2.37877	5e-05	0.00179837	yes	2.37877
TCONS_00018585	XLOC_007396	SOHLH2	chr13:36742344-36871992	KO	Rescue	OK	27.7326	36.0608	0.378848	2.37576	5e-05	0.00179837	yes	2.37576
TCONS_00044482	XLOC_017854	ATF4	chr22:39914892-39918809	KO	Rescue	OK	317.69	411.452	0.373102	2.37525	5e-05	0.00179837	yes	2.37525
TCONS_00037469	XLOC_015032	BCL2L11	chr2:111878490-111926153	KO	Rescue	OK	2.16793	0.889222	-1.2857	-2.37521	0.0002	0.00609992	yes	2.37521
TCONS_00053467	XLOC_021421	CPEB4	chr5:173315066-173387420	KO	Rescue	OK	4.82965	3.41515	-0.499971	-2.37047	5e-05	0.00179837	yes	2.37047
TCONS_00062716	XLOC_025499	FAM126A	chr7:22980783-23053816	KO	Rescue	OK	2.8271	1.70995	-0.725369	-2.36985	5e-05	0.00179837	yes	2.36985
TCONS_00025668	XLOC_010262	-	chr16:16699920-16701555	KO	Rescue	OK	0.198977	0.469573	1.23875	2.36966	0.00035	0.00974863	yes	2.36966
TCONS_00011603	XLOC_004596	ACER3	chr11:76571916-76734850	KO	Rescue	OK	4.39495	5.81396	0.403675	2.36844	5e-05	0.00179837	yes	2.36844
TCONS_00058072	XLOC_023342	-	chr6:89839837-89853534	KO	Rescue	OK	0.378191	0.166409	-1.18438	-2.3684	0.0006	0.0150866	yes	2.3684
TCONS_00042710	XLOC_017138	CTSZ	chr20:57570241-57582309	KO	Rescue	OK	382.762	296.386	-0.368971	-2.3666	5e-05	0.00179837	yes	2.3666
TCONS_00023756	XLOC_009576	RAB26	chr16:2198650-2204141	KO	Rescue	OK	9.47233	6.98966	-0.438498	-2.36528	5e-05	0.00179837	yes	2.36528
TCONS_00055769	XLOC_022390	LOC100294145	chr6:32861952-32871535	KO	Rescue	OK	3.67272	2.41062	-0.607444	-2.36494	5e-05	0.00179837	yes	2.36494
TCONS_00051538	XLOC_020656	AGXT2L1	chr4:109663201-109684235	KO	Rescue	OK	1.87056	3.35707	0.843735	2.36427	5e-05	0.00179837	yes	2.36427
TCONS_00024137	XLOC_009706	TMEM159	chr16:20944475-21192168	KO	Rescue	OK	3.20172	2.0693	-0.629705	-2.36329	5e-05	0.00179837	yes	2.36329
TCONS_00001811	XLOC_000714	STRIP1	chr1:110574198-110615312	KO	Rescue	OK	2.55988	4.00301	0.645011	2.3612	0.0001	0.00333804	yes	2.3612
TCONS_00023186	XLOC_009350	C15orf59	chr15:74032140-74045667	KO	Rescue	OK	0.600774	0.308075	-0.96354	-2.36032	0.0002	0.00609992	yes	2.36032
TCONS_00054220	XLOC_021778	MBLAC2	chr5:89754019-89770585	KO	Rescue	OK	2.321	1.67875	-0.467362	-2.36001	5e-05	0.00179837	yes	2.36001
TCONS_00027578	XLOC_011094	-	chr17:41687253-41692243	KO	Rescue	OK	0.243611	0.0737786	-1.7233	-2.35974	0.0012	0.025911	yes	2.35974
TCONS_00013528	XLOC_005402	GUCY2EP	chr11:76391209-76436987	KO	Rescue	OK	0.863645	1.54867	0.84252	2.35869	5e-05	0.00179837	yes	2.35869
TCONS_00015742	XLOC_006259	OAS1	chr12:113344519-113357712	KO	Rescue	OK	3.16995	1.81129	-0.807439	-2.35623	5e-05	0.00179837	yes	2.35623
TCONS_00014320	XLOC_005676	-	chr12:4677722-4679296	KO	Rescue	OK	0.0738245	0.256655	1.79766	2.35609	0.0023	0.0429672	yes	2.35609
TCONS_00025773	XLOC_010328	CLN3	chr16:28488599-28503623	KO	Rescue	OK	12.1163	8.20412	-0.562528	-2.35599	5e-05	0.00179837	yes	2.35599
TCONS_00066308	XLOC_027087	MAFA	chr8:144510229-144512602	KO	Rescue	OK	1.35708	0.87073	-0.640208	-2.35587	5e-05	0.00179837	yes	2.35587
TCONS_00034497	XLOC_013789	PLIN3	chr19:4838345-4867780	KO	Rescue	OK	45.1442	33.9948	-0.409227	-2.35577	5e-05	0.00179837	yes	2.35577
TCONS_00003980	XLOC_001622	EPHA2	chr1:16450829-16483814	KO	Rescue	OK	16.7613	12.2476	-0.45264	-2.35491	0.0001	0.00333804	yes	2.35491
TCONS_00008702	XLOC_003482	SFMBT2	chr10:7200585-7453448	KO	Rescue	OK	0.66818	2.12982	1.67242	2.353	0.0005	0.0130935	yes	2.353
TCONS_00032765	XLOC_013075	ZNF738	chr19:21541734-21571384	KO	Rescue	OK	0.271814	0.430619	0.663795	2.35219	5e-05	0.00179837	yes	2.35219
TCONS_00008032	XLOC_003222	HECTD2	chr10:93066718-93371217	KO	Rescue	OK	1.8286	2.69979	0.562112	2.35196	0.0001	0.00333804	yes	2.35196
TCONS_00026167	XLOC_010516	-	chr16:69768289-69769754	KO	Rescue	OK	0.203365	0.495229	1.28403	2.35158	0.00055	0.0141432	yes	2.35158
TCONS_00006103	XLOC_002440	IGSF9	chr1:159896769-159915802	KO	Rescue	OK	0.602595	0.291892	-1.04576	-2.35153	5e-05	0.00179837	yes	2.35153
TCONS_00034960	XLOC_013967	LPHN1	chr19:14247963-14318135	KO	Rescue	OK	1.52064	0.377762	-2.00913	-2.3511	0.0007	0.0170555	yes	2.3511
TCONS_00008265	XLOC_003313	NFKB2	chr10:104153866-104162286	KO	Rescue	OK	21.6638	13.9135	-0.638799	-2.34981	5e-05	0.00179837	yes	2.34981
TCONS_00012983	XLOC_005187	MRPL16	chr11:59573607-59578345	KO	Rescue	OK	56.0281	72.4346	0.370529	2.34693	5e-05	0.00179837	yes	2.34693
TCONS_00005585	XLOC_002249	-	chr1:147763023-147768586	KO	Rescue	OK	0.494266	0.154695	-1.67586	-2.34637	0.0008	0.0189292	yes	2.34637
TCONS_00019681	XLOC_007845	PAPLN	chr14:73704154-73925290	KO	Rescue	OK	0.849053	2.11643	1.31771	2.34545	0.00035	0.00974863	yes	2.34545
TCONS_00010421	XLOC_004128	PARVA	chr11:12399025-12556903	KO	Rescue	OK	20.0174	25.7264	0.361999	2.34236	5e-05	0.00179837	yes	2.34236
TCONS_00053508	XLOC_021442	FGFR4	chr5:176513874-176525126	KO	Rescue	OK	1.06175	2.86676	1.43297	2.34136	0.00035	0.00974863	yes	2.34136
TCONS_00010366	XLOC_004103	EIF3F	chr11:8008866-8017719	KO	Rescue	OK	175.331	225.287	0.361684	2.34103	5e-05	0.00179837	yes	2.34103
TCONS_00034545	XLOC_013808	RFX2	chr19:5978413-6110664	KO	Rescue	OK	0.809566	0.404254	-1.00189	-2.33937	5e-05	0.00179837	yes	2.33937
TCONS_00056059	XLOC_022492	VEGFA	chr6:43737418-43754223	KO	Rescue	OK	2.89951	5.9112	1.02764	2.33923	0.0001	0.00333804	yes	2.33923
TCONS_00009562	XLOC_003793	MYOF	chr10:95066185-95242074	KO	Rescue	OK	42.1626	31.7897	-0.407407	-2.33912	0.0001	0.00333804	yes	2.33912
TCONS_00009496	XLOC_003757	MMRN2	chr10:88695297-88723017	KO	Rescue	OK	4.15363	1.84271	-1.17254	-2.33863	0.00035	0.00974863	yes	2.33863
TCONS_00042634	XLOC_017113	ATP9A	chr20:50213313-50384908	KO	Rescue	OK	9.89192	12.7461	0.365734	2.33665	0.0001	0.00333804	yes	2.33665
TCONS_00053507	XLOC_021442	FGFR4	chr5:176513874-176525126	KO	Rescue	OK	2.10493	3.8103	0.856136	2.33395	0.00035	0.00974863	yes	2.33395
TCONS_00034410	XLOC_013751	SLC39A3	chr19:2732522-2740074	KO	Rescue	OK	17.3655	23.5924	0.4421	2.3326	5e-05	0.00179837	yes	2.3326
TCONS_00001642	XLOC_000649	PALMD	chr1:100111157-100232184	KO	Rescue	OK	7.5581	4.26132	-0.826723	-2.33258	5e-05	0.00179837	yes	2.33258
TCONS_00029941	XLOC_011981	SP6	chr17:45922279-45933240	KO	Rescue	OK	1.18462	0.802639	-0.561601	-2.33254	5e-05	0.00179837	yes	2.33254
TCONS_00042624	XLOC_017110	-	chr20:49961265-49983188	KO	Rescue	OK	0.277569	0.0807043	-1.78213	-2.33243	0.0001	0.00333804	yes	2.33243
TCONS_00046215	XLOC_018518	ARIH2	chr3:48955220-49022971	KO	Rescue	OK	14.6178	19.3838	0.407124	2.32954	5e-05	0.00179837	yes	2.32954
TCONS_00053452	XLOC_021416	ATP6V0E1	chr5:172410762-172461900	KO	Rescue	OK	87.1369	67.4204	-0.370098	-2.32874	5e-05	0.00179837	yes	2.32874
TCONS_00033524	XLOC_013350	C5AR1	chr19:47808485-47825404	KO	Rescue	OK	4.35116	3.10078	-0.488767	-2.32678	0.0001	0.00333804	yes	2.32678
TCONS_00016557	XLOC_006568	GXYLT1	chr12:42475647-42538673	KO	Rescue	OK	4.48892	2.44436	-0.87691	-2.32677	0.0005	0.0130935	yes	2.32677
TCONS_00063275	XLOC_025737	SEMA3C	chr7:80371853-80548667	KO	Rescue	OK	13.1636	10.1906	-0.369318	-2.32589	5e-05	0.00179837	yes	2.32589
TCONS_00010987	XLOC_004371	TMEM216	chr11:61159696-61166819	KO	Rescue	OK	2.61957	4.63455	0.823102	2.32464	0.0001	0.00333804	yes	2.32464
TCONS_00022772	XLOC_009192	SLC30A4	chr15:45774679-45848928	KO	Rescue	OK	0.203314	0.0763469	-1.41307	-2.32351	0.0009	0.0207972	yes	2.32351
TCONS_00044355	XLOC_017798	HMOX1	chr22:35777059-35790207	KO	Rescue	OK	10.1795	13.5267	0.410149	2.32341	5e-05	0.00179837	yes	2.32341
TCONS_00062566	XLOC_025424	PDGFA	chr7:536476-559870	KO	Rescue	OK	0.615828	2.35152	1.93299	2.32335	0.0008	0.0189292	yes	2.32335
TCONS_00018933	XLOC_007542	ABCC4	chr13:95672082-95954063	KO	Rescue	OK	13.665	18.1421	0.408858	2.32317	0.0001	0.00333804	yes	2.32317
TCONS_00052333	XLOC_020987	NIM1	chr5:43191851-43280952	KO	Rescue	OK	0.335945	0.612321	0.866065	2.32272	0.00025	0.00734573	yes	2.32272
TCONS_00003992	XLOC_001628	NBPF1	chr1:16890411-16940203	KO	Rescue	OK	1.48212	3.68244	1.313	2.3224	0.0024	0.0443833	yes	2.3224
TCONS_00051708	XLOC_020729	TBC1D9	chr4:141541935-141677471	KO	Rescue	OK	8.02423	6.17753	-0.377332	-2.32225	0.0001	0.00333804	yes	2.32225
TCONS_00065741	XLOC_026838	SBSPON	chr8:73973887-74005507	KO	Rescue	OK	0.629806	0.320744	-0.973487	-2.31981	0.0003	0.00855389	yes	2.31981
TCONS_00051656	XLOC_020706	PGRMC2	chr4:129190391-129209984	KO	Rescue	OK	45.3867	35.3865	-0.35907	-2.31919	5e-05	0.00179837	yes	2.31919
TCONS_00024633	XLOC_009890	GPR56	chr16:57653616-57698944	KO	Rescue	OK	2.36414	1.06423	-1.15151	-2.31816	0.0001	0.00333804	yes	2.31816
TCONS_00050666	XLOC_020292	PALLD	chr4:169418216-169849655	KO	Rescue	OK	10.5315	5.5063	-0.935554	-2.31809	5e-05	0.00179837	yes	2.31809
TCONS_00012733	XLOC_005064	-	chr11:32509984-32511599	KO	Rescue	OK	0.631484	1.09444	0.793381	2.31758	5e-05	0.00179837	yes	2.31758
TCONS_00029098	XLOC_011624	PEMT	chr17:17408872-17495017	KO	Rescue	OK	33.7802	44.9389	0.41179	2.31717	5e-05	0.00179837	yes	2.31717
TCONS_00030612	XLOC_012245	NPLOC4	chr17:79523910-79604181	KO	Rescue	OK	13.5845	5.1319	-1.4044	-2.31696	0.00065	0.0160504	yes	2.31696
TCONS_00069145	XLOC_028241	FIBCD1	chr9:133777824-133814689	KO	Rescue	OK	0.67026	0.327552	-1.033	-2.31538	0.0001	0.00333804	yes	2.31538
TCONS_00068613	XLOC_028034	BARX1	chr9:96713908-96717608	KO	Rescue	OK	19.4255	25.336	0.383232	2.31516	5e-05	0.00179837	yes	2.31516
TCONS_00021900	XLOC_008818	-	chr15:67135192-67137689	KO	Rescue	OK	0.226097	0.087699	-1.36631	-2.31507	0.00065	0.0160504	yes	2.31507
TCONS_00010969	XLOC_004362	TMEM109	chr11:60681370-60690915	KO	Rescue	OK	58.2887	74.7319	0.358508	2.31399	5e-05	0.00179837	yes	2.31399
TCONS_00017187	XLOC_006811	-	chr12:77091249-77093649	KO	Rescue	OK	0.279513	0.0870789	-1.68252	-2.31325	0.001	0.0226328	yes	2.31325
TCONS_00041954	XLOC_016831	-	chr20:293091-295536	KO	Rescue	OK	0.154899	0.336301	1.11843	2.30892	0.00045	0.0120882	yes	2.30892
TCONS_00006018	XLOC_002397	MEF2D	chr1:156433512-156471250	KO	Rescue	OK	7.64961	4.85277	-0.656578	-2.30807	0.0007	0.0170555	yes	2.30807
TCONS_00022974	XLOC_009270	VPS13C	chr15:62144589-62352690	KO	Rescue	OK	3.54293	2.53976	-0.480249	-2.30788	0.00015	0.00477533	yes	2.30788
TCONS_00066934	XLOC_027325	ANXA1	chr9:75766780-75785307	KO	Rescue	OK	137.3	107.161	-0.357544	-2.30667	5e-05	0.00179837	yes	2.30667
TCONS_00053888	XLOC_021618	LIFR	chr5:38474937-38608421	KO	Rescue	OK	17.9529	27.2621	0.602682	2.30607	5e-05	0.00179837	yes	2.30607
TCONS_00052048	XLOC_020872	-	chr5:259508-265213	KO	Rescue	OK	0.167595	0.288921	0.785697	2.30589	0.0002	0.00609992	yes	2.30589
TCONS_00032369	XLOC_012923	CARM1	chr19:10981908-11040916	KO	Rescue	OK	22.1309	32.1173	0.53729	2.30342	5e-05	0.00179837	yes	2.30342
TCONS_00042974	XLOC_017255	C21orf119	chr21:33765441-33766266	KO	Rescue	OK	2.34633	1.35201	-0.795306	-2.30265	0.00025	0.00734573	yes	2.30265
TCONS_00054017	XLOC_021681	ELOVL7	chr5:60047615-60140101	KO	Rescue	OK	0.962547	0.440366	-1.12815	-2.30094	0.0005	0.0130935	yes	2.30094
TCONS_00043511	XLOC_017493	TCP10L	chr21:33947150-33957845	KO	Rescue	OK	0.392113	0.199086	-0.977881	-2.30048	0.00035	0.00974863	yes	2.30048
TCONS_00035077	XLOC_014023	JUND	chr19:18390562-18392453	KO	Rescue	OK	63.1184	48.4883	-0.380424	-2.30046	5e-05	0.00179837	yes	2.30046
TCONS_00063362	XLOC_025773	PON2	chr7:95034173-95064384	KO	Rescue	OK	71.027	92.9616	0.388267	2.29993	5e-05	0.00179837	yes	2.29993
TCONS_00011597	XLOC_004592	C11orf30	chr11:76138317-76264111	KO	Rescue	OK	3.34991	4.7305	0.497871	2.29793	0.00015	0.00477533	yes	2.29793
TCONS_00016763	XLOC_006646	TFCP2	chr12:51487538-51566926	KO	Rescue	OK	14.9733	19.872	0.408346	2.29769	0.0001	0.00333804	yes	2.29769
TCONS_00046010	XLOC_018440	-	chr3:39462002-39463773	KO	Rescue	OK	0.292737	0.105166	-1.47694	-2.29763	0.0009	0.0207972	yes	2.29763
TCONS_00051139	XLOC_020492	USP46	chr4:53457126-53525502	KO	Rescue	OK	3.01059	3.93788	0.387374	2.29732	5e-05	0.00179837	yes	2.29732
TCONS_00033796	XLOC_013478	ZNF480	chr19:52800306-52829181	KO	Rescue	OK	3.3985	4.62203	0.44363	2.29688	5e-05	0.00179837	yes	2.29688
TCONS_00040184	XLOC_016112	-	chr2:165522861-165524386	KO	Rescue	OK	0.0913732	0.288177	1.65711	2.29673	0.0016	0.03249	yes	2.29673
TCONS_00068016	XLOC_027746	PLGRKT	chr9:5357966-5437937	KO	Rescue	OK	14.7534	10.9262	-0.433261	-2.2966	5e-05	0.00179837	yes	2.2966
TCONS_00071864	XLOC_029337	APLN	chrX:128779235-128788933	KO	Rescue	OK	0.588743	0.351412	-0.744477	-2.29614	5e-05	0.00179837	yes	2.29614
TCONS_00024772	XLOC_009919	E2F4	chr16:67225998-67238007	KO	Rescue	OK	25.298	32.8828	0.378305	2.29589	5e-05	0.00179837	yes	2.29589
TCONS_00027299	XLOC_010967	CCL2	chr17:32582295-32584220	KO	Rescue	OK	6.38715	4.27918	-0.577837	-2.29568	0.0001	0.00333804	yes	2.29568
TCONS_00013287	XLOC_005298	MRPL11	chr11:66202549-66206310	KO	Rescue	OK	32.9905	43.6784	0.40487	2.29351	0.0002	0.00609992	yes	2.29351
TCONS_00005578	XLOC_002245	ACP6	chr1:147119167-147142634	KO	Rescue	OK	0.545926	0.269095	-1.02059	-2.29037	0.00065	0.0160504	yes	2.29037
TCONS_00026190	XLOC_010523	COG4	chr16:70514471-70557457	KO	Rescue	OK	29.5743	22.7026	-0.381488	-2.29034	5e-05	0.00179837	yes	2.29034
TCONS_00065017	XLOC_026519	DENND3	chr8:142127378-142205900	KO	Rescue	OK	1.59495	0.513616	-1.63475	-2.28931	0.0009	0.0207972	yes	2.28931
TCONS_00026630	XLOC_010705	ARRB2	chr17:4613788-4624796	KO	Rescue	OK	13.4916	7.67356	-0.81409	-2.28842	0.00025	0.00734573	yes	2.28842
TCONS_00026163	XLOC_010514	NQO1	chr16:69743303-69760533	KO	Rescue	OK	141.393	187.35	0.406027	2.28821	0.00015	0.00477533	yes	2.28821
TCONS_00005303	XLOC_002122	LRIF1	chr1:111489567-111506698	KO	Rescue	OK	1.37157	2.2148	0.691352	2.28681	5e-05	0.00179837	yes	2.28681
TCONS_00012522	XLOC_004982	RNF141	chr11:10533224-10562774	KO	Rescue	OK	13.3634	17.1779	0.362259	2.28589	5e-05	0.00179837	yes	2.28589
TCONS_00014696	XLOC_005845	LYRM5	chr12:25348149-25358030	KO	Rescue	OK	11.8004	8.50578	-0.472317	-2.28586	0.0001	0.00333804	yes	2.28586
TCONS_00050323	XLOC_020163	ENPEP	chr4:111397228-111484493	KO	Rescue	OK	0.403266	0.61952	0.619421	2.28538	0.0001	0.00333804	yes	2.28538
TCONS_00012346	XLOC_004896	NUP98	chr11:3696123-3847703	KO	Rescue	OK	29.3245	39.7314	0.438175	2.28502	5e-05	0.00179837	yes	2.28502
TCONS_00040281	XLOC_016149	CHN1	chr2:175664041-175870207	KO	Rescue	OK	1.2988	2.37292	0.869485	2.28429	0.0002	0.00609992	yes	2.28429
TCONS_00058568	XLOC_023523	-	chr6:154709260-154710781	KO	Rescue	OK	0.0816056	0.268686	1.71918	2.28396	0.002	0.038734	yes	2.28396
TCONS_00016678	XLOC_006616	-	chr12:49324945-49326035	KO	Rescue	OK	6.54521	4.62777	-0.500121	-2.28334	5e-05	0.00179837	yes	2.28334
TCONS_00058177	XLOC_023380	BEND3	chr6:107386384-107437314	KO	Rescue	OK	3.60504	4.99116	0.46936	2.28272	0.00015	0.00477533	yes	2.28272
TCONS_00033673	XLOC_013422	RCN3	chr19:50030874-50046890	KO	Rescue	OK	35.4952	27.5851	-0.363735	-2.28218	0.0001	0.00333804	yes	2.28218
TCONS_00048317	XLOC_019334	ARHGEF3	chr3:56761445-57113336	KO	Rescue	OK	0.897839	0.277069	-1.69621	-2.28132	0.0008	0.0189292	yes	2.28132
TCONS_00013696	XLOC_005462	TAF1D	chr11:93394738-93500323	KO	Rescue	OK	2.32077	5.37539	1.21177	2.28077	0.00015	0.00477533	yes	2.28077
TCONS_00033194	XLOC_013237	LTBP4	chr19:41099071-41135725	KO	Rescue	OK	2.79223	4.78334	0.776598	2.27975	0.00015	0.00477533	yes	2.27975
TCONS_00018405	XLOC_007314	MCF2L	chr13:113623534-113754053	KO	Rescue	OK	0.811232	1.24616	0.619299	2.27962	5e-05	0.00179837	yes	2.27962
TCONS_00057366	XLOC_023060	HLA-C	chr6:31236525-31324995	KO	Rescue	OK	53.4034	72.0426	0.431918	2.27924	0.0001	0.00333804	yes	2.27924
TCONS_00014565	XLOC_005779	CREBL2	chr12:12764830-12798041	KO	Rescue	OK	18.5026	14.4026	-0.361402	-2.27811	5e-05	0.00179837	yes	2.27811
TCONS_00004362	XLOC_001754	COL16A1	chr1:32117847-32169768	KO	Rescue	OK	1.02622	0.276734	-1.89077	-2.27675	0.0002	0.00609992	yes	2.27675
TCONS_00039408	XLOC_015792	FAM136A	chr2:70523107-70529220	KO	Rescue	OK	52.1097	66.6428	0.354898	2.27656	5e-05	0.00179837	yes	2.27656
TCONS_00012678	XLOC_005049	-	chr11:27350920-27352774	KO	Rescue	OK	0.607098	1.02208	0.751509	2.2757	0.00025	0.00734573	yes	2.2757
TCONS_00049751	XLOC_019904	-	chr4:24320060-24345063	KO	Rescue	OK	2.14649	1.3762	-0.641287	-2.27567	0.0002	0.00609992	yes	2.27567
TCONS_00058379	XLOC_023460	SGK1	chr6:134490383-134639297	KO	Rescue	OK	154.249	198.274	0.362237	2.27297	5e-05	0.00179837	yes	2.27297
TCONS_00041695	XLOC_016729	TSHZ2	chr20:51588718-52111869	KO	Rescue	OK	0.276874	0.60068	1.11737	2.27274	0.00015	0.00477533	yes	2.27274
TCONS_00052115	XLOC_020891	KIAA0947	chr5:5422785-5490347	KO	Rescue	OK	27.4267	34.983	0.351072	2.27186	0.00015	0.00477533	yes	2.27186
TCONS_00063075	XLOC_025639	PSPH	chr7:56077520-56119268	KO	Rescue	OK	2.48691	4.21168	0.760038	2.26945	0.00015	0.00477533	yes	2.26945
TCONS_00052499	XLOC_021052	CENPH	chr5:68485368-68506184	KO	Rescue	OK	24.2884	32.2898	0.410813	2.26776	0.00015	0.00477533	yes	2.26776
TCONS_00002204	XLOC_000905	TUFT1	chr1:151512780-151556059	KO	Rescue	OK	6.8598	4.05194	-0.759553	-2.26663	0.0013	0.0276517	yes	2.26663
TCONS_00012240	XLOC_004858	SLC25A22	chr11:790473-798305	KO	Rescue	OK	9.23505	14.5382	0.654661	2.26662	5e-05	0.00179837	yes	2.26662
TCONS_00066972	XLOC_027337	PSAT1	chr9:80912058-80945009	KO	Rescue	OK	66.203	84.8375	0.357806	2.26444	0.0001	0.00333804	yes	2.26444
TCONS_00035374	XLOC_014144	ZNF529	chr19:37034516-37096178	KO	Rescue	OK	0.404302	0.772695	0.934467	2.2639	0.0011	0.0244225	yes	2.2639
TCONS_00027823	XLOC_011177	ITGA3	chr17:48133339-48167874	KO	Rescue	OK	24.544	18.0329	-0.44474	-2.26388	0.00025	0.00734573	yes	2.26388
TCONS_00002614	XLOC_001068	UHMK1	chr1:162466963-162499510	KO	Rescue	OK	28.2218	21.3294	-0.40397	-2.2637	5e-05	0.00179837	yes	2.2637
TCONS_00039163	XLOC_015688	-	chr2:42158748-42161765	KO	Rescue	OK	1.76333	0.561792	-1.65019	-2.26285	0.0026	0.0469108	yes	2.26285
TCONS_00004460	XLOC_001786	ZMYM6	chr1:35451745-35497569	KO	Rescue	OK	0.550388	1.27894	1.21642	2.26255	0.0007	0.0170555	yes	2.26255
TCONS_00066371	XLOC_027103	-	chr8:144972593-144978349	KO	Rescue	OK	0.39667	0.0990356	-2.00192	-2.26187	0.0015	0.0308992	yes	2.26187
TCONS_00061235	XLOC_024884	BBS9	chr7:33168863-33645680	KO	Rescue	OK	1.07505	0.623735	-0.785405	-2.26123	0.00015	0.00477533	yes	2.26123
TCONS_00044683	XLOC_017951	ADM2	chr22:50919984-50924866	KO	Rescue	OK	0.954954	1.80758	0.92056	2.26052	0.001	0.0226328	yes	2.26052
TCONS_00010629	XLOC_004221	PRR5L	chr11:36317724-36498243	KO	Rescue	OK	0.320852	0.124709	-1.36334	-2.2603	0.0006	0.0150866	yes	2.2603
TCONS_00031436	XLOC_012557	LAMA1	chr18:6939006-7117813	KO	Rescue	OK	19.2729	34.8103	0.852938	2.2576	0.00025	0.00734573	yes	2.2576
TCONS_00064167	XLOC_026139	SLC7A2	chr8:17354518-17428077	KO	Rescue	OK	1.45503	2.74517	0.915852	2.25756	0.00015	0.00477533	yes	2.25756
TCONS_00007531	XLOC_003021	SYT15	chr10:46951455-46972892	KO	Rescue	OK	3.71744	2.57196	-0.53144	-2.2568	0.0003	0.00855389	yes	2.2568
TCONS_00048622	XLOC_019462	LRRC58	chr3:120043575-120068186	KO	Rescue	OK	31.301	39.8651	0.34892	2.25657	5e-05	0.00179837	yes	2.25657
TCONS_00064162	XLOC_026137	ZDHHC2	chr8:17013485-17083158	KO	Rescue	OK	0.0976279	0.253943	1.37914	2.25579	0.0002	0.00609992	yes	2.25579
TCONS_00029759	XLOC_011899	MPP3	chr17:41878166-41910708	KO	Rescue	OK	2.58291	3.67251	0.507771	2.255	5e-05	0.00179837	yes	2.255
TCONS_00000619	XLOC_000253	PDIK1L	chr1:26437655-26452039	KO	Rescue	OK	0.969642	1.70638	0.815413	2.25389	0.0003	0.00855389	yes	2.25389
TCONS_00057107	XLOC_022951	TPMT	chr6:18128544-18155374	KO	Rescue	OK	18.2551	14.2266	-0.359712	-2.25349	5e-05	0.00179837	yes	2.25349
TCONS_00019934	XLOC_007954	EML1	chr14:100259502-100408518	KO	Rescue	OK	0.606174	0.201687	-1.58762	-2.25028	0.00045	0.0120882	yes	2.25028
TCONS_00000601	XLOC_000242	CLIC4	chr1:25071759-25170815	KO	Rescue	OK	73.8118	57.987	-0.348121	-2.24977	5e-05	0.00179837	yes	2.24977
TCONS_00034598	XLOC_013835	INSR	chr19:7112265-7294457	KO	Rescue	OK	0.197884	0.560736	1.50267	2.24949	0.00065	0.0160504	yes	2.24949
TCONS_00036468	XLOC_014608	-	chr2:879404-881209	KO	Rescue	OK	0.104914	0.283263	1.43293	2.24894	0.00145	0.0301433	yes	2.24894
TCONS_00040274	XLOC_016147	WIPF1	chr2:175424201-175547627	KO	Rescue	OK	16.5228	21.7197	0.394543	2.24806	0.0001	0.00333804	yes	2.24806
TCONS_00014941	XLOC_005935	SMARCD1	chr12:50478937-50494568	KO	Rescue	OK	37.5979	49.6405	0.400866	2.24786	0.0001	0.00333804	yes	2.24786
TCONS_00018456	XLOC_007337	PSPC1	chr13:20248891-20357159	KO	Rescue	OK	27.5985	19.6975	-0.486583	-2.24721	0.0002	0.00609992	yes	2.24721
TCONS_00050344	XLOC_020172	UGT8	chr4:115519503-115599300	KO	Rescue	OK	9.27002	13.2258	0.512712	2.24637	0.00025	0.00734573	yes	2.24637
TCONS_00013721	XLOC_005472	CWC15	chr11:94695786-94706776	KO	Rescue	OK	42.2134	53.9639	0.354294	2.24438	0.00015	0.00477533	yes	2.24438
TCONS_00020357	XLOC_008163	CDH24	chr14:23516269-23527066	KO	Rescue	OK	1.31727	2.98092	1.17821	2.24353	0.00095	0.0216666	yes	2.24353
TCONS_00043298	XLOC_017385	ADARB1	chr21:46494023-46647440	KO	Rescue	OK	1.95209	3.91573	1.00426	2.2429	0.0005	0.0130935	yes	2.2429
TCONS_00013105	XLOC_005227	CHRM1	chr11:62676150-62689012	KO	Rescue	OK	0.250585	0.111868	-1.16351	-2.24271	0.00075	0.0180567	yes	2.24271
TCONS_00044931	XLOC_018053	DDT	chr22:24309025-24322019	KO	Rescue	OK	51.5978	67.6192	0.390122	2.24107	0.00015	0.00477533	yes	2.24107
TCONS_00051059	XLOC_020463	UGDH	chr4:39500374-39529218	KO	Rescue	OK	11.1208	14.3313	0.365911	2.2407	0.0001	0.00333804	yes	2.2407
TCONS_00014738	XLOC_005856	PPFIBP1	chr12:27677044-27848497	KO	Rescue	OK	3.99979	6.96389	0.79997	2.24059	0.0001	0.00333804	yes	2.24059
TCONS_00016822	XLOC_006680	KRT8	chr12:53290970-53346685	KO	Rescue	OK	2112.35	1381.68	-0.612425	-2.24032	0.00015	0.00477533	yes	2.24032
TCONS_00067609	XLOC_027565	PHYHD1	chr9:131683173-131704320	KO	Rescue	OK	9.915	6.7477	-0.555217	-2.23983	0.0001	0.00333804	yes	2.23983
TCONS_00052918	XLOC_021209	LMNB1	chr5:126112314-126189259	KO	Rescue	OK	38.6259	53.1162	0.459583	2.23887	0.0001	0.00333804	yes	2.23887
TCONS_00052057	XLOC_020874	PDCD6	chr5:271513-438533	KO	Rescue	OK	148.036	212.2	0.519477	2.23708	0.0001	0.00333804	yes	2.23708
TCONS_00054738	XLOC_021971	CSF1R	chr5:149432728-149493042	KO	Rescue	OK	1.09805	0.499358	-1.1368	-2.23653	5e-05	0.00179837	yes	2.23653
TCONS_00011450	XLOC_004543	NADSYN1	chr11:71164216-71232184	KO	Rescue	OK	2.53727	4.53606	0.838165	2.2316	0.0006	0.0150866	yes	2.2316
TCONS_00007822	XLOC_003140	-	chr10:76471935-76475743	KO	Rescue	OK	0.504344	0.307312	-0.714702	-2.2304	0.0002	0.00609992	yes	2.2304
TCONS_00027572	XLOC_011089	-	chr17:41399692-41401769	KO	Rescue	OK	0.456237	0.85616	0.908096	2.23016	0.00025	0.00734573	yes	2.23016
TCONS_00025803	XLOC_010344	CDIPT	chr16:29869677-29874578	KO	Rescue	OK	23.9826	18.6561	-0.362337	-2.22882	5e-05	0.00179837	yes	2.22882
TCONS_00040847	XLOC_016391	HES6	chr2:239146907-239148685	KO	Rescue	OK	1.84089	0.987431	-0.898654	-2.22732	0.00055	0.0141432	yes	2.22732
TCONS_00028173	XLOC_011308	TMEM104	chr17:72772621-72835922	KO	Rescue	OK	5.87616	4.52844	-0.375857	-2.2269	0.0001	0.00333804	yes	2.2269
TCONS_00048705	XLOC_019485	HEG1	chr3:124684391-124775121	KO	Rescue	OK	4.32841	2.78639	-0.635441	-2.22656	0.00055	0.0141432	yes	2.22656
TCONS_00012564	XLOC_004998	-	chr11:13012469-13054557	KO	Rescue	OK	0.84403	1.54667	0.8738	2.2265	0.0001	0.00333804	yes	2.2265
TCONS_00011630	XLOC_004606	-	chr11:81349265-81350195	KO	Rescue	OK	0.0545042	0.360195	2.72434	2.22584	0.0026	0.0469108	yes	2.22584
TCONS_00054368	XLOC_021829	PPIC	chr5:122359077-122372425	KO	Rescue	OK	6.29086	4.52772	-0.474472	-2.22569	0.00025	0.00734573	yes	2.22569
TCONS_00055370	XLOC_022247	HIST1H2BD	chr6:26158043-26173253	KO	Rescue	OK	3.1817	1.50443	-1.08058	-2.22435	0.00045	0.0120882	yes	2.22435
TCONS_00010503	XLOC_004164	NAV2	chr11:19372270-20143147	KO	Rescue	OK	1.52123	0.757064	-1.00675	-2.22267	0.00055	0.0141432	yes	2.22267
TCONS_00034390	XLOC_013735	MKNK2	chr19:2037469-2051243	KO	Rescue	OK	38.3533	29.315	-0.38771	-2.22217	0.00015	0.00477533	yes	2.22217
TCONS_00058488	XLOC_023496	PLAGL1	chr6:144261434-144385735	KO	Rescue	OK	6.7302	4.12484	-0.706311	-2.22134	5e-05	0.00179837	yes	2.22134
TCONS_00000719	XLOC_000288	RCC1	chr1:28832454-28870578	KO	Rescue	OK	49.2499	69.0372	0.487254	2.22004	5e-05	0.00179837	yes	2.22004
TCONS_00007380	XLOC_002967	-	chr10:29431564-29432968	KO	Rescue	OK	2.31865	0.953471	-1.28202	-2.21975	0.0025	0.0458365	yes	2.21975
TCONS_00026657	XLOC_010718	KIF1C	chr17:4900936-4931694	KO	Rescue	OK	27.2169	35.0582	0.365249	2.21957	5e-05	0.00179837	yes	2.21957
TCONS_00010450	XLOC_004145	-	chr11:17364737-17367053	KO	Rescue	OK	0.569945	0.318015	-0.841731	-2.21918	0.0003	0.00855389	yes	2.21918
TCONS_00030792	XLOC_012314	SMCHD1	chr18:2655885-2805015	KO	Rescue	OK	15.4313	19.5798	0.343513	2.21795	5e-05	0.00179837	yes	2.21795
TCONS_00021499	XLOC_008673	DISP2	chr15:40650433-40663256	KO	Rescue	OK	0.500149	0.320479	-0.642128	-2.21792	0.0003	0.00855389	yes	2.21792
TCONS_00000137	XLOC_000059	PLCH2	chr1:2399004-2436964	KO	Rescue	OK	0.20376	0.0677623	-1.58831	-2.21624	0.0004	0.0109047	yes	2.21624
TCONS_00011200	XLOC_004448	-	chr11:65090679-65097738	KO	Rescue	OK	0.497228	0.299109	-0.733238	-2.21618	0.0004	0.0109047	yes	2.21618
TCONS_00016842	XLOC_006685	RARG	chr12:53604338-53626374	KO	Rescue	OK	5.85532	9.03085	0.625114	2.21556	0.0002	0.00609992	yes	2.21556
TCONS_00015681	XLOC_006238	FAM222A	chr12:110152186-110211294	KO	Rescue	OK	2.99023	2.16568	-0.465437	-2.21522	0.00015	0.00477533	yes	2.21522
TCONS_00051669	XLOC_020713	SLC7A11	chr4:138948576-139163587	KO	Rescue	OK	0.369595	0.908133	1.29696	2.21472	0.00015	0.00477533	yes	2.21472
TCONS_00036826	XLOC_014759	PKDCC	chr2:42275145-42286547	KO	Rescue	OK	47.0447	36.1437	-0.380288	-2.21396	0.0003	0.00855389	yes	2.21396
TCONS_00012179	XLOC_004842	IFITM3	chr11:319672-327313	KO	Rescue	OK	217.712	168.795	-0.367145	-2.21292	0.0001	0.00333804	yes	2.21292
TCONS_00005335	XLOC_002137	RHOC	chr1:113243748-113250025	KO	Rescue	OK	48.3526	33.7527	-0.518593	-2.21277	5e-05	0.00179837	yes	2.21277
TCONS_00007296	XLOC_002937	CACNB2	chr10:18429605-18944083	KO	Rescue	OK	0.563312	1.4287	1.34269	2.21263	0.00025	0.00734573	yes	2.21263
TCONS_00038233	XLOC_015329	FAM117B	chr2:203499900-203634480	KO	Rescue	OK	4.10919	5.3076	0.369204	2.21198	0.0001	0.00333804	yes	2.21198
TCONS_00002406	XLOC_000982	-	chr1:155591829-155593474	KO	Rescue	OK	0.215423	0.0559647	-1.94458	-2.21155	0.0022	0.0415626	yes	2.21155
TCONS_00010990	XLOC_004372	SDHAF2	chr11:61197596-61214239	KO	Rescue	OK	31.8477	40.8405	0.35881	2.21108	5e-05	0.00179837	yes	2.21108
TCONS_00035179	XLOC_014058	ZNF100	chr19:21906537-21950430	KO	Rescue	OK	1.01587	1.46334	0.526545	2.21054	0.00025	0.00734573	yes	2.21054
TCONS_00040848	XLOC_016391	HES6	chr2:239146907-239148685	KO	Rescue	OK	1.12661	0.512337	-1.13683	-2.21032	0.0002	0.00609992	yes	2.21032
TCONS_00020832	XLOC_008370	ZFYVE1	chr14:73436158-73493920	KO	Rescue	OK	0.975589	0.671261	-0.5394	-2.20962	0.0001	0.00333804	yes	2.20962
TCONS_00013951	XLOC_005562	MPZL2	chr11:118124130-118135251	KO	Rescue	OK	2.73665	1.96685	-0.476525	-2.20918	0.0001	0.00333804	yes	2.20918
TCONS_00030027	XLOC_012028	TOB1	chr17:48939586-48945732	KO	Rescue	OK	148.16	115.881	-0.354516	-2.20887	5e-05	0.00179837	yes	2.20887
TCONS_00053642	XLOC_021504	-	chr5:730569-732709	KO	Rescue	OK	1.75419	0.871468	-1.00929	-2.20815	0.00035	0.00974863	yes	2.20815
TCONS_00029136	XLOC_011638	ZNF286B	chr17:18561741-18585572	KO	Rescue	OK	0.577973	0.883804	0.612724	2.20702	0.0001	0.00333804	yes	2.20702
TCONS_00051026	XLOC_020452	ARAP2	chr4:36059738-36246397	KO	Rescue	OK	0.277782	0.555626	1.00016	2.20698	0.0014	0.0292935	yes	2.20698
TCONS_00035498	XLOC_014187	LRFN1	chr19:39797208-39811598	KO	Rescue	OK	1.47743	2.79669	0.920635	2.20651	0.00095	0.0216666	yes	2.20651
TCONS_00034408	XLOC_013749	DIRAS1	chr19:2714564-2721390	KO	Rescue	OK	3.19113	2.37013	-0.429101	-2.20496	0.00015	0.00477533	yes	2.20496
TCONS_00046455	XLOC_018594	-	chr3:58312843-58313936	KO	Rescue	OK	0.372775	0.103651	-1.84657	-2.20242	0.0021	0.0402058	yes	2.20242
TCONS_00003995	XLOC_001628	NBPF1	chr1:16890411-16940203	KO	Rescue	OK	1.28175	0.493979	-1.37559	-2.20121	0.00135	0.0284327	yes	2.20121
TCONS_00003895	XLOC_001575	GPR157	chr1:9160369-9189235	KO	Rescue	OK	0.845399	1.3486	0.673763	2.20105	0.00015	0.00477533	yes	2.20105
TCONS_00027719	XLOC_011135	NSF	chr17:44668034-44834830	KO	Rescue	OK	20.7663	15.7296	-0.400769	-2.19999	0.0001	0.00333804	yes	2.19999
TCONS_00013198	XLOC_005259	ATG2A	chr11:64662003-64684894	KO	Rescue	OK	1.1982	2.36412	0.980431	2.19969	0.00155	0.0316751	yes	2.19969
TCONS_00066601	XLOC_027183	CNTLN	chr9:17134943-17503917	KO	Rescue	OK	2.02804	1.065	-0.929235	-2.19874	0.0012	0.025911	yes	2.19874
TCONS_00022209	XLOC_008960	AKAP13	chr15:85923809-86292658	KO	Rescue	OK	0.253154	1.02699	2.02034	2.19648	0.0017	0.0341249	yes	2.19648
TCONS_00013051	XLOC_005216	C11orf48	chr11:62430288-62441162	KO	Rescue	OK	23.8896	35.0094	0.551361	2.19601	5e-05	0.00179837	yes	2.19601
TCONS_00055451	XLOC_022275	ZNF391	chr6:27356504-27371648	KO	Rescue	OK	0.41721	0.23067	-0.854943	-2.19556	0.0008	0.0189292	yes	2.19556
TCONS_00015193	XLOC_006020	RAB5B	chr12:56367696-56390507	KO	Rescue	OK	25.2877	19.8064	-0.352473	-2.19523	5e-05	0.00179837	yes	2.19523
TCONS_00041546	XLOC_016671	HNF4A	chr20:42984440-43061485	KO	Rescue	OK	0.501023	0.14325	-1.80635	-2.19148	0.00255	0.0464657	yes	2.19148
TCONS_00013997	XLOC_005578	-	chr11:119188413-119189468	KO	Rescue	OK	0.976997	0.449243	-1.12086	-2.19118	0.0007	0.0170555	yes	2.19118
TCONS_00008871	XLOC_003553	MPP7	chr10:28339920-28592006	KO	Rescue	OK	4.79295	7.09876	0.566652	2.1911	5e-05	0.00179837	yes	2.1911
TCONS_00000159	XLOC_000066	ARHGEF16	chr1:3370983-3397695	KO	Rescue	OK	1.05033	0.378749	-1.47153	-2.1908	0.0018	0.035815	yes	2.1908
TCONS_00000658	XLOC_000269	SFN	chr1:27189632-27190947	KO	Rescue	OK	89.4006	70.5164	-0.342327	-2.19029	0.0001	0.00333804	yes	2.19029
TCONS_00034596	XLOC_013835	INSR	chr19:7112265-7294457	KO	Rescue	OK	0.304839	2.28305	2.90484	2.19018	0.0012	0.025911	yes	2.19018
TCONS_00012438	XLOC_004946	TPP1	chr11:6512629-6640692	KO	Rescue	OK	11.7751	19.9121	0.757911	2.19011	5e-05	0.00179837	yes	2.19011
TCONS_00011506	XLOC_004558	-	chr11:72281274-72284403	KO	Rescue	OK	0.136055	0.279115	1.03666	2.19	0.00035	0.00974863	yes	2.19
TCONS_00012238	XLOC_004858	SLC25A22	chr11:790473-798305	KO	Rescue	OK	9.49011	5.7184	-0.730813	-2.18911	0.0004	0.0109047	yes	2.18911
TCONS_00067668	XLOC_027589	GPR107	chr9:132815984-132902448	KO	Rescue	OK	16.1904	12.0207	-0.429623	-2.18841	0.0002	0.00609992	yes	2.18841
TCONS_00049035	XLOC_019619	KCNAB1	chr3:155838336-156256927	KO	Rescue	OK	0.618465	0.848348	0.455964	2.18834	5e-05	0.00179837	yes	2.18834
TCONS_00036546	XLOC_014643	GREB1	chr2:11674241-11782912	KO	Rescue	OK	0.549514	0.379836	-0.532779	-2.18791	0.0002	0.00609992	yes	2.18791
TCONS_00011204	XLOC_004451	DPF2	chr11:65100762-65121735	KO	Rescue	OK	21.7059	27.6835	0.350942	2.18464	0.0002	0.00609992	yes	2.18464
TCONS_00000633	XLOC_000259	SH3BGRL3	chr1:26606212-26608013	KO	Rescue	OK	34.6002	26.9244	-0.361865	-2.18403	0.0002	0.00609992	yes	2.18403
TCONS_00063751	XLOC_025937	UBE2H	chr7:129470571-129592800	KO	Rescue	OK	14.5816	11.3768	-0.358059	-2.18232	0.00015	0.00477533	yes	2.18232
TCONS_00002473	XLOC_001004	PEAR1	chr1:156863522-156886226	KO	Rescue	OK	0.250139	0.139372	-0.843785	-2.18229	0.0005	0.0130935	yes	2.18229
TCONS_00058655	XLOC_023584	-	chr6:166310216-166311535	KO	Rescue	OK	0.18592	0.455183	1.29176	2.18171	0.00125	0.0267805	yes	2.18171
TCONS_00053807	XLOC_021589	ADAMTS12	chr5:33523649-33892663	KO	Rescue	OK	2.5127	1.12843	-1.15492	-2.17994	0.00025	0.00734573	yes	2.17994
TCONS_00049647	XLOC_019851	HTRA3	chr4:8271488-8308838	KO	Rescue	OK	0.17064	0.433097	1.34374	2.1796	0.0008	0.0189292	yes	2.1796
TCONS_00013437	XLOC_005365	PDE2A	chr11:72287183-72385497	KO	Rescue	OK	7.9365	13.3111	0.746059	2.1791	0.0003	0.00855389	yes	2.1791
TCONS_00038222	XLOC_015321	STRADB	chr2:202316391-202345574	KO	Rescue	OK	5.75589	7.5574	0.392852	2.17862	0.0002	0.00609992	yes	2.17862
TCONS_00013509	XLOC_005394	KLHL35	chr11:75133435-75141674	KO	Rescue	OK	1.46953	2.40343	0.709737	2.17748	0.0003	0.00855389	yes	2.17748
TCONS_00005976	XLOC_002389	UBQLN4	chr1:156005091-156023516	KO	Rescue	OK	30.9611	39.1429	0.338295	2.17704	0.0002	0.00609992	yes	2.17704
TCONS_00012326	XLOC_004892	ZNF195	chr11:3379026-3400452	KO	Rescue	OK	0.951585	2.02543	1.08983	2.17549	0.0004	0.0109047	yes	2.17549
TCONS_00000521	XLOC_000209	NBPF3	chr1:21766529-21811456	KO	Rescue	OK	0.802226	1.24588	0.63509	2.17522	5e-05	0.00179837	yes	2.17522
TCONS_00012940	XLOC_005161	SLC43A3	chr11:57174421-57195053	KO	Rescue	OK	24.4972	41.4766	0.759682	2.17415	0.0002	0.00609992	yes	2.17415
TCONS_00023274	XLOC_009373	PTPN9	chr15:75759461-75871625	KO	Rescue	OK	10.6887	13.6076	0.348323	2.17315	0.0001	0.00333804	yes	2.17315
TCONS_00066661	XLOC_027201	DMRTA1	chr9:22301594-22452677	KO	Rescue	OK	1.08358	0.476671	-1.18474	-2.1725	0.00105	0.0235431	yes	2.1725
TCONS_00052913	XLOC_021206	GRAMD3	chr5:125695787-125829853	KO	Rescue	OK	6.11171	4.24919	-0.524389	-2.17224	0.0001	0.00333804	yes	2.17224
TCONS_00044527	XLOC_017876	SREBF2	chr22:42229049-42303310	KO	Rescue	OK	30.5509	23.1739	-0.398717	-2.1716	0.0001	0.00333804	yes	2.1716
TCONS_00038923	XLOC_015584	LAPTM4A	chr2:20232410-20251789	KO	Rescue	OK	99.0358	78.4502	-0.336173	-2.17077	0.0002	0.00609992	yes	2.17077
TCONS_00004080	XLOC_001659	CAMK2N1	chr1:20808883-20812728	KO	Rescue	OK	5.57924	4.20261	-0.408784	-2.16963	0.0003	0.00855389	yes	2.16963
TCONS_00013580	XLOC_005431	PRCP	chr11:82535408-82611557	KO	Rescue	OK	30.6589	38.9017	0.343528	2.16962	0.00015	0.00477533	yes	2.16962
TCONS_00053676	XLOC_021521	-	chr5:1792271-1796040	KO	Rescue	OK	0.383448	0.223178	-0.780835	-2.16956	0.00045	0.0120882	yes	2.16956
TCONS_00042458	XLOC_017045	JPH2	chr20:42737378-42816578	KO	Rescue	OK	1.55389	2.17866	0.487556	2.16894	0.00015	0.00477533	yes	2.16894
TCONS_00035145	XLOC_014044	PBX4	chr19:19672515-19729725	KO	Rescue	OK	0.223713	0.672414	1.5877	2.16728	0.0006	0.0150866	yes	2.16728
TCONS_00018359	XLOC_007300	-	chr13:110439310-110442915	KO	Rescue	OK	0.494708	0.301633	-0.713784	-2.16638	0.0003	0.00855389	yes	2.16638
TCONS_00061775	XLOC_025110	LMTK2	chr7:97736178-97838944	KO	Rescue	OK	3.68441	5.25005	0.510897	2.16569	0.0005	0.0130935	yes	2.16569
TCONS_00009077	XLOC_003607	ANXA8	chr10:47157983-47174143	KO	Rescue	OK	2.38248	1.42957	-0.736884	-2.16531	5e-05	0.00179837	yes	2.16531
TCONS_00026040	XLOC_010457	ZNF319	chr16:58028572-58034761	KO	Rescue	OK	1.97454	0.854996	-1.20753	-2.16481	0.0004	0.0109047	yes	2.16481
TCONS_00056822	XLOC_022839	IGF2R	chr6:160390062-160532517	KO	Rescue	OK	0.640824	1.4734	1.20115	2.16481	0.0004	0.0109047	yes	2.16481
TCONS_00062377	XLOC_025362	CUL1	chr7:148395932-148498202	KO	Rescue	OK	35.351	44.6174	0.335857	2.16403	0.0001	0.00333804	yes	2.16403
TCONS_00004181	XLOC_001687	GALE	chr1:24122088-24127294	KO	Rescue	OK	16.5358	11.8235	-0.483936	-2.16367	0.00025	0.00734573	yes	2.16367
TCONS_00014459	XLOC_005734	RIMKLB	chr12:8834149-8935689	KO	Rescue	OK	2.71176	4.88896	0.850299	2.16344	0.00035	0.00974863	yes	2.16344
TCONS_00035823	XLOC_014334	SLC1A5	chr19:47278139-47291842	KO	Rescue	OK	61.6767	78.5828	0.349488	2.16321	5e-05	0.00179837	yes	2.16321
TCONS_00009807	XLOC_003878	SH3PXD2A	chr10:105253734-105615164	KO	Rescue	OK	6.37692	3.15382	-1.01576	-2.16167	0.00045	0.0120882	yes	2.16167
TCONS_00027268	XLOC_010948	RHOT1	chr17:30469439-30552746	KO	Rescue	OK	2.17044	4.22221	0.960011	2.16076	0.001	0.0226328	yes	2.16076
TCONS_00001446	XLOC_000556	ACADM	chr1:76190042-76229355	KO	Rescue	OK	62.4963	48.856	-0.355233	-2.15893	0.0003	0.00855389	yes	2.15893
TCONS_00048754	XLOC_019504	MGLL	chr3:127407904-127542296	KO	Rescue	OK	7.03105	2.38448	-1.56007	-2.15721	0.0015	0.0308992	yes	2.15721
TCONS_00063832	XLOC_025970	SVOPL	chr7:138276517-138386145	KO	Rescue	OK	2.43733	5.01641	1.04136	2.15544	0.00025	0.00734573	yes	2.15544
TCONS_00063498	XLOC_025823	TFR2	chr7:100218038-100239173	KO	Rescue	OK	0.418318	0.958413	1.19605	2.15466	0.0018	0.035815	yes	2.15466
TCONS_00010562	XLOC_004192	QSER1	chr11:32914791-33001814	KO	Rescue	OK	21.519	27.0982	0.332584	2.15241	0.0002	0.00609992	yes	2.15241
TCONS_00015949	XLOC_006334	AACS	chr12:125549799-125627873	KO	Rescue	OK	5.4176	7.23209	0.416759	2.15226	0.00035	0.00974863	yes	2.15226
TCONS_00008227	XLOC_003297	SFXN3	chr10:102790995-102801000	KO	Rescue	OK	8.87313	5.77635	-0.619284	-2.15216	0.00055	0.0141432	yes	2.15216
TCONS_00012022	XLOC_004772	SC5DL	chr11:121163387-121184119	KO	Rescue	OK	3.7753	2.83998	-0.410714	-2.1517	5e-05	0.00179837	yes	2.1517
TCONS_00018553	XLOC_007385	HSPH1	chr13:31710762-31736330	KO	Rescue	OK	57.6812	73.2507	0.344741	2.15152	0.00025	0.00734573	yes	2.15152
TCONS_00041692	XLOC_016726	BCAS4	chr20:49411466-49493714	KO	Rescue	OK	0.694428	0.280213	-1.3093	-2.15072	0.0026	0.0469108	yes	2.15072
TCONS_00067501	XLOC_027532	-	chr9:129987504-130155828	KO	Rescue	OK	0.228973	0.455039	0.990811	2.15043	0.0003	0.00855389	yes	2.15043
TCONS_00067437	XLOC_027515	LHX2	chr9:126773888-126795442	KO	Rescue	OK	2.95082	2.14587	-0.459553	-2.15042	0.00015	0.00477533	yes	2.15042
TCONS_00044534	XLOC_017881	FAM109B	chr22:42470254-42475443	KO	Rescue	OK	2.2306	3.21138	0.525764	2.15027	0.00035	0.00974863	yes	2.15027
TCONS_00031591	XLOC_012623	INO80C	chr18:33048290-33077955	KO	Rescue	OK	15.4706	11.5942	-0.416121	-2.1498	0.00015	0.00477533	yes	2.1498
TCONS_00037255	XLOC_014946	RPIA	chr2:88991175-89050452	KO	Rescue	OK	9.73919	12.6131	0.373048	2.14931	0.00015	0.00477533	yes	2.14931
TCONS_00048288	XLOC_019321	DCP1A	chr3:53317444-53381654	KO	Rescue	OK	6.40888	8.14632	0.346075	2.14923	0.0002	0.00609992	yes	2.14923
TCONS_00009991	XLOC_003938	IKZF5	chr10:124750321-124768366	KO	Rescue	OK	2.55076	3.56131	0.481482	2.14903	0.00015	0.00477533	yes	2.14903
TCONS_00013984	XLOC_005573	SLC37A4	chr11:118895060-118901632	KO	Rescue	OK	12.3251	16.561	0.426184	2.14859	0.00015	0.00477533	yes	2.14859
TCONS_00057995	XLOC_023315	HMGN3	chr6:79910961-79946517	KO	Rescue	OK	44.8014	60.3945	0.430874	2.14844	0.00025	0.00734573	yes	2.14844
TCONS_00006420	XLOC_002576	ARPC5	chr1:183595327-183605076	KO	Rescue	OK	102.686	81.5559	-0.332384	-2.14783	0.0001	0.00333804	yes	2.14783
TCONS_00035678	XLOC_014271	PLAUR	chr19:44149807-44179685	KO	Rescue	OK	5.84239	8.08521	0.468727	2.14739	0.0003	0.00855389	yes	2.14739
TCONS_00045182	XLOC_018149	IL2RB	chr22:37521879-37552404	KO	Rescue	OK	0.400108	0.239611	-0.739695	-2.14735	0.00025	0.00734573	yes	2.14735
TCONS_00013643	XLOC_005442	PICALM	chr11:85668213-85780923	KO	Rescue	OK	15.2238	9.60547	-0.664397	-2.14694	0.00025	0.00734573	yes	2.14694
TCONS_00044601	XLOC_017904	FBLN1	chr22:45898718-45997014	KO	Rescue	OK	24.5163	15.652	-0.647396	-2.14656	0.0003	0.00855389	yes	2.14656
TCONS_00051805	XLOC_020772	C4orf46	chr4:159587830-159593202	KO	Rescue	OK	6.30141	8.0956	0.361463	2.14626	0.00015	0.00477533	yes	2.14626
TCONS_00027945	XLOC_011207	SCPEP1	chr17:55055467-55084129	KO	Rescue	OK	10.5391	8.11001	-0.377981	-2.14602	0.00025	0.00734573	yes	2.14602
TCONS_00026876	XLOC_010795	USP43	chr17:9548031-9633005	KO	Rescue	OK	3.96167	2.0467	-0.952809	-2.14601	0.00125	0.0267805	yes	2.14601
TCONS_00021013	XLOC_008435	TRIP11	chr14:92432341-92507843	KO	Rescue	OK	3.97667	2.97232	-0.419971	-2.14567	0.00015	0.00477533	yes	2.14567
TCONS_00032108	XLOC_012829	HDGFRP2	chr19:4471874-4518957	KO	Rescue	OK	2.46349	0.486382	-2.34054	-2.14559	0.0028	0.0494992	yes	2.14559
TCONS_00008145	XLOC_003261	ANKRD2	chr10:99332255-99343641	KO	Rescue	OK	1.98766	1.2938	-0.61946	-2.14313	0.00045	0.0120882	yes	2.14313
TCONS_00044651	XLOC_017932	-	chr22:50293545-50295509	KO	Rescue	OK	0.246689	0.0951225	-1.37483	-2.14248	0.00125	0.0267805	yes	2.14248
TCONS_00056871	XLOC_022858	MLLT4	chr6:168227603-168372700	KO	Rescue	OK	0.433421	0.205866	-1.07407	-2.14171	0.0019	0.0372657	yes	2.14171
TCONS_00042868	XLOC_017196	LIPI	chr21:15456312-15579254	KO	Rescue	OK	0.560725	0.19834	-1.49932	-2.14058	0.0021	0.0402058	yes	2.14058
TCONS_00063819	XLOC_025968	TRIM24	chr7:138145078-138276399	KO	Rescue	OK	0.495211	1.11564	1.17176	2.14052	0.0003	0.00855389	yes	2.14052
TCONS_00007604	XLOC_003052	FAM21A	chr10:51827683-51893269	KO	Rescue	OK	3.85847	2.96317	-0.38089	-2.14034	0.0001	0.00333804	yes	2.14034
TCONS_00025812	XLOC_010346	KCTD13	chr16:29911510-29937545	KO	Rescue	OK	0.576451	1.72535	1.58161	2.13967	0.00155	0.0316751	yes	2.13967
TCONS_00027380	XLOC_011003	ARHGAP23	chr17:36584675-36668628	KO	Rescue	OK	3.78046	7.23948	0.937324	2.13953	0.00085	0.0199166	yes	2.13953
TCONS_00061026	XLOC_024806	GLCCI1	chr7:8008373-8128709	KO	Rescue	OK	10.1258	7.97116	-0.345168	-2.1394	0.0002	0.00609992	yes	2.1394
TCONS_00037938	XLOC_015218	DLX1	chr2:172949147-172954402	KO	Rescue	OK	4.24806	5.88193	0.469484	2.13873	0.0004	0.0109047	yes	2.13873
TCONS_00001083	XLOC_000427	-	chr1:44510495-44601163	KO	Rescue	OK	0.159146	0.394426	1.3094	2.13802	0.0006	0.0150866	yes	2.13802
TCONS_00013252	XLOC_005284	FIBP	chr11:65647283-65656010	KO	Rescue	OK	33.1414	43.1219	0.379785	2.13708	0.0003	0.00855389	yes	2.13708
TCONS_00053274	XLOC_021340	ARHGEF37	chr5:148960923-149014527	KO	Rescue	OK	0.277025	0.10946	-1.33962	-2.13667	0.00025	0.00734573	yes	2.13667
TCONS_00068307	XLOC_027886	-	chr9:35968792-35969420	KO	Rescue	OK	0.712218	0	#NAME?	#NAME?	5e-05	0.00179837	yes	2.13665
TCONS_00055367	XLOC_022247	HIST1H2BD	chr6:26158043-26173253	KO	Rescue	OK	0.667835	0.306695	-1.12269	-2.13608	0.00075	0.0180567	yes	2.13608
TCONS_00006104	XLOC_002440	IGSF9	chr1:159896769-159915802	KO	Rescue	OK	0.79211	0.464114	-0.77122	-2.13454	0.00045	0.0120882	yes	2.13454
TCONS_00005626	XLOC_002272	ANP32E	chr1:150190716-150208504	KO	Rescue	OK	59.3322	77.6677	0.388501	2.13329	0.0003	0.00855389	yes	2.13329
TCONS_00022054	XLOC_008882	C15orf39	chr15:75493928-75504510	KO	Rescue	OK	7.28838	10.0865	0.468757	2.13275	0.0004	0.0109047	yes	2.13275
TCONS_00050495	XLOC_020229	GAB1	chr4:144257982-144395718	KO	Rescue	OK	0.604848	1.04506	0.788943	2.13272	0.00025	0.00734573	yes	2.13272
TCONS_00031138	XLOC_012436	MAPK4	chr18:48086483-48258196	KO	Rescue	OK	10.9067	7.16582	-0.606005	-2.13271	0.00045	0.0120882	yes	2.13271
TCONS_00040595	XLOC_016277	PECR	chr2:216902410-216946547	KO	Rescue	OK	3.18767	2.20839	-0.529505	-2.13219	0.0005	0.0130935	yes	2.13219
TCONS_00002634	XLOC_001075	PBX1	chr1:164528151-164821060	KO	Rescue	OK	4.83218	7.20618	0.576562	2.1319	0.0006	0.0150866	yes	2.1319
TCONS_00039748	XLOC_015937	RNF149	chr2:101892062-101925178	KO	Rescue	OK	13.0647	16.5786	0.343646	2.13184	0.00025	0.00734573	yes	2.13184
TCONS_00013957	XLOC_005565	IFT46	chr11:118401802-118436791	KO	Rescue	OK	4.48218	3.10405	-0.53005	-2.13124	0.0002	0.00609992	yes	2.13124
TCONS_00000987	XLOC_000399	PPIH	chr1:43124047-43142429	KO	Rescue	OK	39.6863	50.6906	0.353077	2.13062	0.00025	0.00734573	yes	2.13062
TCONS_00011654	XLOC_004613	TMEM126B	chr11:85339610-85347583	KO	Rescue	OK	15.0076	22.4686	0.582218	2.12933	0.0004	0.0109047	yes	2.12933
TCONS_00004635	XLOC_001849	LEPRE1	chr1:43212005-43232755	KO	Rescue	OK	14.8958	10.4929	-0.505495	-2.12932	0.0002	0.00609992	yes	2.12932
TCONS_00047690	XLOC_019120	SH3BP5	chr3:15247647-15382901	KO	Rescue	OK	29.9393	39.8547	0.412709	2.12931	0.0002	0.00609992	yes	2.12931
TCONS_00027842	XLOC_011183	ACSF2	chr17:48503518-48552200	KO	Rescue	OK	1.88817	0.640676	-1.55932	-2.12929	0.0014	0.0292935	yes	2.12929
TCONS_00032151	XLOC_012848	NRTN	chr19:5805037-5828335	KO	Rescue	OK	1.33175	0.726774	-0.873747	-2.128	0.0002	0.00609992	yes	2.128
TCONS_00041339	XLOC_016604	RALY	chr20:32581101-32672833	KO	Rescue	OK	17.2893	22.4747	0.37842	2.12768	0.0002	0.00609992	yes	2.12768
TCONS_00012706	XLOC_005056	-	chr11:29320208-29357817	KO	Rescue	OK	0.203067	0.39174	0.947944	2.12561	0.0003	0.00855389	yes	2.12561
TCONS_00066139	XLOC_026998	-	chr8:128123023-128241813	KO	Rescue	OK	6.61456	12.3548	0.901352	2.12536	0.00025	0.00734573	yes	2.12536
TCONS_00004946	XLOC_001976	-	chr1:67862837-67865844	KO	Rescue	OK	0.0739751	0.208048	1.4918	2.12491	0.00125	0.0267805	yes	2.12491
TCONS_00030936	XLOC_012373	MIB1	chr18:19321544-19450912	KO	Rescue	OK	13.0552	10.3781	-0.331082	-2.1246	0.00025	0.00734573	yes	2.1246
TCONS_00044185	XLOC_017748	CCDC117	chr22:29168661-29185283	KO	Rescue	OK	15.4453	19.4818	0.334957	2.12446	0.00025	0.00734573	yes	2.12446
TCONS_00013293	XLOC_005301	CTSF	chr11:66330934-66336047	KO	Rescue	OK	8.50377	6.51888	-0.383479	-2.1242	0.00035	0.00974863	yes	2.1242
TCONS_00062534	XLOC_025415	UBE3C	chr7:156931654-157062066	KO	Rescue	OK	28.5919	35.903	0.328495	2.12398	0.00015	0.00477533	yes	2.12398
TCONS_00023168	XLOC_009340	-	chr15:72624448-72627973	KO	Rescue	OK	0.255388	0.131746	-0.954934	-2.12337	0.00065	0.0160504	yes	2.12337
TCONS_00068276	XLOC_027869	FAM214B	chr9:35104117-35115893	KO	Rescue	OK	2.33634	1.20257	-0.958125	-2.12196	0.0004	0.0109047	yes	2.12196
TCONS_00015721	XLOC_006252	ACAD10	chr12:112123856-112194911	KO	Rescue	OK	1.54589	0.891016	-0.794911	-2.12019	0.0003	0.00855389	yes	2.12019
TCONS_00006128	XLOC_002447	COPA	chr1:160258376-160328742	KO	Rescue	OK	64.0465	48.7537	-0.393609	-2.1196	0.0002	0.00609992	yes	2.1196
TCONS_00052461	XLOC_021043	NLN	chr5:65018011-65125206	KO	Rescue	OK	11.8064	15.7018	0.411365	2.1195	0.00035	0.00974863	yes	2.1195
TCONS_00041416	XLOC_016629	MYL9	chr20:35169886-35178226	KO	Rescue	OK	11.9615	8.46172	-0.499369	-2.11913	0.0002	0.00609992	yes	2.11913
TCONS_00011729	XLOC_004657	SRSF8	chr11:94800055-94804388	KO	Rescue	OK	10.9232	13.8034	0.337624	2.11847	0.0002	0.00609992	yes	2.11847
TCONS_00016452	XLOC_006523	KRAS	chr12:25358179-25403854	KO	Rescue	OK	21.5607	27.2788	0.339375	2.11822	0.0004	0.0109047	yes	2.11822
TCONS_00041955	XLOC_016832	-	chr20:295673-299826	KO	Rescue	OK	0.201765	0.342181	0.76208	2.11787	0.0005	0.0130935	yes	2.11787
TCONS_00000042	XLOC_000010	KLHL17	chr1:895966-901099	KO	Rescue	OK	6.37274	8.23511	0.369873	2.11595	0.00035	0.00974863	yes	2.11595
TCONS_00066532	XLOC_027163	INSL4	chr9:5231406-5234972	KO	Rescue	OK	0.785231	1.51609	0.949168	2.11365	0.0008	0.0189292	yes	2.11365
TCONS_00061593	XLOC_025050	RHBDD2	chr7:75508316-75518244	KO	Rescue	OK	27.1057	20.5592	-0.398811	-2.11353	0.0005	0.0130935	yes	2.11353
TCONS_00039032	XLOC_015624	MPV17	chr2:27532359-27545969	KO	Rescue	OK	21.5877	16.663	-0.373564	-2.11147	0.0003	0.00855389	yes	2.11147
TCONS_00025274	XLOC_010096	POLR3K	chr16:96978-103632	KO	Rescue	OK	90.8833	114.435	0.332438	2.10785	0.00035	0.00974863	yes	2.10785
TCONS_00070298	XLOC_028710	WBP5	chrX:102611106-102613397	KO	Rescue	OK	37.3528	20.5225	-0.864011	-2.10729	0.00015	0.00477533	yes	2.10729
TCONS_00008803	XLOC_003530	DNAJC1	chr10:22045476-22292650	KO	Rescue	OK	20.7498	16.3605	-0.342884	-2.10727	0.0003	0.00855389	yes	2.10727
TCONS_00023685	XLOC_009547	CACNA1H	chr16:1203127-1275254	KO	Rescue	OK	0.289561	0.0711939	-2.02404	-2.10722	0.0018	0.035815	yes	2.10722
TCONS_00050394	XLOC_020197	FGF2	chr4:123747862-123844159	KO	Rescue	OK	7.43451	5.78833	-0.36109	-2.1062	0.0004	0.0109047	yes	2.1062
TCONS_00048626	XLOC_019465	RABL3	chr3:120405527-120461384	KO	Rescue	OK	5.73626	7.33115	0.353928	2.10467	0.0002	0.00609992	yes	2.10467
TCONS_00040951	XLOC_016437	SOX12	chr20:300087-335512	KO	Rescue	OK	12.3243	15.5756	0.337782	2.10426	0.00025	0.00734573	yes	2.10426
TCONS_00033383	XLOC_013301	BCL3	chr19:45245581-45263302	KO	Rescue	OK	16.1286	12.0254	-0.423541	-2.10421	0.0005	0.0130935	yes	2.10421
TCONS_00053646	XLOC_021508	-	chr5:860809-861126	KO	Rescue	OK	2.55306	0.941837	-1.43868	-2.10395	0.0022	0.0415626	yes	2.10395
TCONS_00051324	XLOC_020584	SEC31A	chr4:83739813-83812419	KO	Rescue	OK	14.5739	6.71993	-1.11687	-2.10366	0.00065	0.0160504	yes	2.10366
TCONS_00013008	XLOC_005199	CPSF7	chr11:61170119-61197464	KO	Rescue	OK	19.3238	28.1378	0.542129	2.10262	0.00025	0.00734573	yes	2.10262
TCONS_00043900	XLOC_017632	-	chr22:18576250-18585771	KO	Rescue	OK	0.941772	1.24202	0.399239	2.10224	0.0003	0.00855389	yes	2.10224
TCONS_00036904	XLOC_014799	SPTBN1	chr2:54683453-54898583	KO	Rescue	OK	54.1664	41.371	-0.388778	-2.10132	5e-05	0.00179837	yes	2.10132
TCONS_00045028	XLOC_018090	LIF	chr22:30636435-30654011	KO	Rescue	OK	0.489297	0.150743	-1.69862	-2.10093	0.0026	0.0469108	yes	2.10093
TCONS_00049237	XLOC_019693	EHHADH	chr3:184880688-184971886	KO	Rescue	OK	0.712765	0.446477	-0.674841	-2.10093	0.0005	0.0130935	yes	2.10093
TCONS_00044143	XLOC_017727	CRYBB2P1	chr22:25844047-25857645	KO	Rescue	OK	1.69489	0.488765	-1.79398	-2.1008	0.002	0.038734	yes	2.1008
TCONS_00027651	XLOC_011117	CCDC103	chr17:42977079-42982691	KO	Rescue	OK	0.456867	1.10781	1.27786	2.10058	0.0015	0.0308992	yes	2.10058
TCONS_00031760	XLOC_012677	MEX3C	chr18:48700919-48724051	KO	Rescue	OK	5.06886	6.48343	0.355094	2.09921	0.0002	0.00609992	yes	2.09921
TCONS_00030862	XLOC_012344	-	chr18:10598807-10606663	KO	Rescue	OK	0.318567	0.0818343	-1.96082	-2.09831	0.00165	0.0332947	yes	2.09831
TCONS_00020657	XLOC_008295	DLGAP5	chr14:55614833-55658396	KO	Rescue	OK	9.04609	5.25227	-0.784353	-2.09648	0.00025	0.00734573	yes	2.09648
TCONS_00045036	XLOC_018093	TBC1D10A	chr22:30687978-30722955	KO	Rescue	OK	4.52493	3.3288	-0.442895	-2.09376	0.00035	0.00974863	yes	2.09376
TCONS_00045604	XLOC_018293	ITPR1	chr3:4535031-4889524	KO	Rescue	OK	0.481308	1.83921	1.93405	2.09351	0.00165	0.0332947	yes	2.09351
TCONS_00011937	XLOC_004742	ARCN1	chr11:118443101-118473747	KO	Rescue	OK	62.9423	49.9825	-0.332606	-2.09321	0.0004	0.0109047	yes	2.09321
TCONS_00026632	XLOC_010706	MED11	chr17:4634722-4643223	KO	Rescue	OK	19.3133	25.7045	0.412426	2.09246	0.00035	0.00974863	yes	2.09246
TCONS_00003528	XLOC_001437	EXO1	chr1:242011121-242053241	KO	Rescue	OK	11.0734	16.1461	0.54408	2.0916	0.0003	0.00855389	yes	2.0916
TCONS_00005893	XLOC_002367	THBS3	chr1:155165378-155177772	KO	Rescue	OK	2.09382	1.40279	-0.577841	-2.09113	0.0003	0.00855389	yes	2.09113
TCONS_00003577	XLOC_001454	CNST	chr1:246729618-246831884	KO	Rescue	OK	3.01288	4.12985	0.454946	2.09093	0.00045	0.0120882	yes	2.09093
TCONS_00018009	XLOC_007146	COG6	chr13:40229763-40365802	KO	Rescue	OK	8.23248	6.42871	-0.356799	-2.09072	0.0001	0.00333804	yes	2.09072
TCONS_00035340	XLOC_014132	-	chr19:36667576-36669417	KO	Rescue	OK	0.470746	0.23861	-0.980298	-2.09042	0.00075	0.0180567	yes	2.09042
TCONS_00013724	XLOC_005474	FAM76B	chr11:95502105-95522970	KO	Rescue	OK	3.59003	5.78626	0.688635	2.09032	0.0005	0.0130935	yes	2.09032
TCONS_00008357	XLOC_003349	ACSL5	chr10:114133915-114188138	KO	Rescue	OK	3.00512	2.25854	-0.412032	-2.08997	0.00015	0.00477533	yes	2.08997
TCONS_00039123	XLOC_015669	-	chr2:38337447-38339061	KO	Rescue	OK	0.243931	0.0818125	-1.57608	-2.0889	0.00245	0.0450915	yes	2.0889
TCONS_00044738	XLOC_017977	CECR5	chr22:17618408-17646335	KO	Rescue	OK	29.7559	37.7855	0.344656	2.08775	0.0001	0.00333804	yes	2.08775
TCONS_00006247	XLOC_002497	CREG1	chr1:167510250-167523056	KO	Rescue	OK	47.071	37.5164	-0.327317	-2.08768	5e-05	0.00179837	yes	2.08768
TCONS_00053314	XLOC_021353	GM2A	chr5:150632612-150649953	KO	Rescue	OK	7.99164	6.26208	-0.351851	-2.0874	0.0004	0.0109047	yes	2.0874
TCONS_00025737	XLOC_010306	USP31	chr16:23072639-23160783	KO	Rescue	OK	1.68424	0.591069	-1.5107	-2.08712	0.0015	0.0308992	yes	2.08712
TCONS_00061172	XLOC_024862	PLEKHA8	chr7:30067962-30170089	KO	Rescue	OK	1.27977	1.80122	0.493093	2.08698	0.00045	0.0120882	yes	2.08698
TCONS_00024878	XLOC_009961	NFAT5	chr16:69599858-69738569	KO	Rescue	OK	1.69475	0.892772	-0.924708	-2.08681	0.00035	0.00974863	yes	2.08681
TCONS_00010278	XLOC_004053	RRM1	chr11:4115923-4160106	KO	Rescue	OK	124.184	155.493	0.324373	2.08661	0.0004	0.0109047	yes	2.08661
TCONS_00052295	XLOC_020977	C5orf51	chr5:41904469-41921738	KO	Rescue	OK	26.1258	32.6793	0.322899	2.08631	0.0003	0.00855389	yes	2.08631
TCONS_00012742	XLOC_005070	-	chr11:33715478-33717447	KO	Rescue	OK	0.227222	0.0877592	-1.37248	-2.08418	0.00215	0.0409798	yes	2.08418
TCONS_00052840	XLOC_021172	DCP2	chr5:112312406-112824527	KO	Rescue	OK	6.22395	8.61888	0.46967	2.08318	0.0005	0.0130935	yes	2.08318
TCONS_00024658	XLOC_009897	CCDC113	chr16:58283839-58328951	KO	Rescue	OK	3.36033	2.51258	-0.41943	-2.08277	0.0002	0.00609992	yes	2.08277
TCONS_00064828	XLOC_026423	-	chr8:101364233-101364864	KO	Rescue	OK	0.871294	0.323328	-1.43016	-2.08249	0.0025	0.0458365	yes	2.08249
TCONS_00051965	XLOC_020842	ACSL1	chr4:185676748-185747239	KO	Rescue	OK	0.435638	0.087194	-2.32083	-2.08209	0.0013	0.0276517	yes	2.08209
TCONS_00047919	XLOC_019199	KIAA1143	chr3:44790235-44803173	KO	Rescue	OK	7.71752	9.72995	0.334295	2.0793	0.0002	0.00609992	yes	2.0793
TCONS_00066170	XLOC_027025	-	chr8:128265273-128278390	KO	Rescue	OK	1.32888	1.90908	0.522667	2.07925	0.00025	0.00734573	yes	2.07925
TCONS_00039148	XLOC_015682	MAP4K3	chr2:39476406-39664453	KO	Rescue	OK	4.40178	2.6554	-0.729157	-2.0784	0.0002	0.00609992	yes	2.0784
TCONS_00068681	XLOC_028059	CTSL2	chr9:99791958-99801925	KO	Rescue	OK	2.71262	2.06556	-0.393155	-2.0779	0.0001	0.00333804	yes	2.0779
TCONS_00062228	XLOC_025285	-	chr7:134858685-134866702	KO	Rescue	OK	0.175601	0.271598	0.629171	2.0757	0.00055	0.0141432	yes	2.0757
TCONS_00020624	XLOC_008281	TXNDC16	chr14:52897208-53019301	KO	Rescue	OK	3.29474	2.19505	-0.585909	-2.07506	0.0011	0.0244225	yes	2.07506
TCONS_00053733	XLOC_021554	DNAH5	chr5:13690436-14012029	KO	Rescue	OK	0.226271	0.156105	-0.535529	-2.07474	0.0008	0.0189292	yes	2.07474
TCONS_00027354	XLOC_010992	DHRS11	chr17:34948225-34957233	KO	Rescue	OK	9.88106	13.4003	0.439533	2.07421	0.0005	0.0130935	yes	2.07421
TCONS_00003256	XLOC_001341	2017-03-02	chr1:220921568-220958229	KO	Rescue	OK	2.79819	4.61038	0.72039	2.07397	0.0004	0.0109047	yes	2.07397
TCONS_00041680	XLOC_016722	LOC284751	chr20:48909053-48932239	KO	Rescue	OK	1.84625	2.81323	0.607629	2.07326	0.0006	0.0150866	yes	2.07326
TCONS_00041613	XLOC_016694	UBE2C	chr20:44441254-44445596	KO	Rescue	OK	127.604	161.587	0.340634	2.07204	0.0002	0.00609992	yes	2.07204
TCONS_00013923	XLOC_005553	BACE1	chr11:117103403-117186972	KO	Rescue	OK	2.26533	1.41131	-0.682688	-2.07194	0.0004	0.0109047	yes	2.07194
TCONS_00067140	XLOC_027409	HABP4	chr9:99212413-99253618	KO	Rescue	OK	4.80738	3.66792	-0.390287	-2.07152	0.0005	0.0130935	yes	2.07152
TCONS_00064919	XLOC_026472	FAM83A	chr8:124194447-124222318	KO	Rescue	OK	4.38612	2.79076	-0.652288	-2.07149	0.0008	0.0189292	yes	2.07149
TCONS_00038719	XLOC_015503	TWIST2	chr2:239756636-239832237	KO	Rescue	OK	4.36367	6.49962	0.574814	2.07131	0.00115	0.0252705	yes	2.07131
TCONS_00034355	XLOC_013723	MEX3D	chr19:1554667-1568057	KO	Rescue	OK	10.3888	14.1242	0.443147	2.07034	0.0006	0.0150866	yes	2.07034
TCONS_00053954	XLOC_021657	MOCS2	chr5:52393894-52405598	KO	Rescue	OK	27.9794	21.9314	-0.351364	-2.07005	0.0002	0.00609992	yes	2.07005
TCONS_00008781	XLOC_003519	PTPLA	chr10:17631957-17659373	KO	Rescue	OK	15.6332	19.9953	0.355047	2.06975	0.00025	0.00734573	yes	2.06975
TCONS_00023296	XLOC_009383	NRG4	chr15:76228361-76304919	KO	Rescue	OK	3.41137	5.42418	0.669053	2.06902	0.00055	0.0141432	yes	2.06902
TCONS_00066300	XLOC_027083	-	chr8:144362332-144363855	KO	Rescue	OK	2.08773	0.895576	-1.22105	-2.06864	0.00075	0.0180567	yes	2.06864
TCONS_00071707	XLOC_029265	MORC4	chrX:106143292-106243487	KO	Rescue	OK	2.87786	1.82078	-0.660437	-2.06783	0.0023	0.0429672	yes	2.06783
TCONS_00055498	XLOC_022291	-	chr6:28143968-28145506	KO	Rescue	OK	0.277179	0.102708	-1.43227	-2.06752	0.00245	0.0450915	yes	2.06752
TCONS_00023126	XLOC_009329	LARP6	chr15:71123888-71146498	KO	Rescue	OK	4.04625	2.31756	-0.803979	-2.06613	0.0003	0.00855389	yes	2.06613
TCONS_00056237	XLOC_022571	SENP6	chr6:76311391-76428152	KO	Rescue	OK	5.8578	9.08989	0.633905	2.06314	0.00035	0.00974863	yes	2.06314
TCONS_00015625	XLOC_006215	CHST11	chr12:104850691-105155792	KO	Rescue	OK	1.12686	0.498714	-1.17602	-2.06264	0.001	0.0226328	yes	2.06264
TCONS_00069119	XLOC_028228	CRAT	chr9:131857072-131873070	KO	Rescue	OK	4.21769	3.04727	-0.468938	-2.06264	0.00065	0.0160504	yes	2.06264
TCONS_00000453	XLOC_000183	PADI1	chr1:17531620-17572501	KO	Rescue	OK	0.327538	0.188929	-0.793815	-2.06181	0.0007	0.0170555	yes	2.06181
TCONS_00011677	XLOC_004623	-	chr11:86647776-86648920	KO	Rescue	OK	0.0988477	0.328535	1.73277	2.06035	0.00255	0.0464657	yes	2.06035
TCONS_00067232	XLOC_027440	SMC2	chr9:106856377-106908735	KO	Rescue	OK	9.54469	13.8976	0.542067	2.06002	0.0006	0.0150866	yes	2.06002
TCONS_00070552	XLOC_028815	HPRT1	chrX:133594174-133634698	KO	Rescue	OK	48.5422	60.7865	0.324513	2.05981	0.00035	0.00974863	yes	2.05981
TCONS_00031221	XLOC_012468	PHLPP1	chr18:60382671-60647676	KO	Rescue	OK	3.96013	5.01824	0.341637	2.05976	0.0003	0.00855389	yes	2.05976
TCONS_00068885	XLOC_028151	MEGF9	chr9:123363195-123477597	KO	Rescue	OK	10.4905	8.03112	-0.385411	-2.05869	0.0004	0.0109047	yes	2.05869
TCONS_00016470	XLOC_006530	ITPR2	chr12:26488113-26986217	KO	Rescue	OK	1.05315	2.17856	1.04866	2.05851	0.0012	0.025911	yes	2.05851
TCONS_00070711	XLOC_028883	VMA21	chrX:150565656-150577836	KO	Rescue	OK	23.485	29.3136	0.319831	2.05823	0.00025	0.00734573	yes	2.05823
TCONS_00035047	XLOC_014002	HAUS8	chr19:17160570-17186343	KO	Rescue	OK	10.8729	14.2639	0.391627	2.05807	0.0006	0.0150866	yes	2.05807
TCONS_00010656	XLOC_004230	HSD17B12	chr11:43702142-43881874	KO	Rescue	OK	6.11841	8.38319	0.454343	2.05792	0.0004	0.0109047	yes	2.05792
TCONS_00025930	XLOC_010408	SHCBP1	chr16:46614467-46655311	KO	Rescue	OK	44.8997	35.9836	-0.319367	-2.05655	0.0004	0.0109047	yes	2.05655
TCONS_00061157	XLOC_024854	TAX1BP1	chr7:27778991-28280996	KO	Rescue	OK	17.6523	25.5258	0.532097	2.0565	0.0005	0.0130935	yes	2.0565
TCONS_00005539	XLOC_002227	PDE4DIP	chr1:144835267-145076186	KO	Rescue	OK	1.29206	0.841685	-0.618324	-2.05644	0.0004	0.0109047	yes	2.05644
TCONS_00014670	XLOC_005831	-	chr12:20842405-20843312	KO	Rescue	OK	0.224022	0.573363	1.35581	2.05611	0.00235	0.0436472	yes	2.05611
TCONS_00054135	XLOC_021741	AP3B1	chr5:77298149-77590579	KO	Rescue	OK	31.4438	25.1895	-0.31995	-2.05526	0.0006	0.0150866	yes	2.05526
TCONS_00036136	XLOC_014472	ZNF614	chr19:52516576-52531680	KO	Rescue	OK	0.968515	1.3222	0.449092	2.05444	0.0005	0.0130935	yes	2.05444
TCONS_00066070	XLOC_026974	EXT1	chr8:118811601-119124058	KO	Rescue	OK	19.1167	15.2445	-0.326544	-2.05419	0.00035	0.00974863	yes	2.05419
TCONS_00047619	XLOC_019094	SEC13	chr3:10342612-10362894	KO	Rescue	OK	92.5908	73.3911	-0.335264	-2.05373	0.0003	0.00855389	yes	2.05373
TCONS_00034324	XLOC_013718	-	chr19:1321213-1325366	KO	Rescue	OK	0.57411	0.877516	0.612097	2.05352	0.0006	0.0150866	yes	2.05352
TCONS_00006401	XLOC_002566	GLUL	chr1:182350838-182361341	KO	Rescue	OK	16.3495	21.4643	0.392699	2.05126	0.0002	0.00609992	yes	2.05126
TCONS_00017972	XLOC_007125	FRY	chr13:32605436-32870776	KO	Rescue	OK	0.210142	0.129665	-0.696574	-2.05122	0.0007	0.0170555	yes	2.05122
TCONS_00045008	XLOC_018085	RFPL1-AS1	chr22:29833003-29838444	KO	Rescue	OK	0.127	0.230355	0.859026	2.05064	0.0007	0.0170555	yes	2.05064
TCONS_00051663	XLOC_020708	-	chr4:134178412-134184840	KO	Rescue	OK	7.16267	5.09654	-0.49098	-2.05	0.00055	0.0141432	yes	2.05
TCONS_00055246	XLOC_022195	EDN1	chr6:12288693-12297427	KO	Rescue	OK	2.06934	1.27058	-0.703679	-2.04997	0.0006	0.0150866	yes	2.04997
TCONS_00070776	XLOC_028910	SLC6A8	chrX:152953298-152962056	KO	Rescue	OK	1.06775	0.508022	-1.07162	-2.04951	0.0024	0.0443833	yes	2.04951
TCONS_00003392	XLOC_001395	RHOU	chr1:228780393-228882416	KO	Rescue	OK	1.25946	0.804464	-0.646705	-2.04866	0.00095	0.0216666	yes	2.04866
TCONS_00046005	XLOC_018436	SLC25A38	chr3:39424814-39438819	KO	Rescue	OK	11.4557	14.5302	0.342988	2.04822	0.00035	0.00974863	yes	2.04822
TCONS_00009648	XLOC_003824	PYROXD2	chr10:100143321-100175284	KO	Rescue	OK	0.254408	0.089776	-1.50274	-2.04802	0.0014	0.0292935	yes	2.04802
TCONS_00022399	XLOC_009040	-	chr15:101615496-101618454	KO	Rescue	OK	0.573563	0.866002	0.594418	2.04777	0.0005	0.0130935	yes	2.04777
TCONS_00050896	XLOC_020383	LYAR	chr4:4269428-4291896	KO	Rescue	OK	30.0568	40.5454	0.431847	2.04657	0.0006	0.0150866	yes	2.04657
TCONS_00012336	XLOC_004892	ZNF195	chr11:3379026-3400452	KO	Rescue	OK	0.255103	0.861735	1.75617	2.04655	0.00255	0.0464657	yes	2.04655
TCONS_00000180	XLOC_000073	DFFB	chr1:3773844-3801993	KO	Rescue	OK	2.42774	3.21702	0.40611	2.0465	0.00045	0.0120882	yes	2.0465
TCONS_00027288	XLOC_010959	-	chr17:30719505-30721597	KO	Rescue	OK	0.304271	0.14127	-1.1069	-2.04445	0.0012	0.025911	yes	2.04445
TCONS_00024511	XLOC_009828	GPT2	chr16:46918189-46965201	KO	Rescue	OK	4.11133	2.14484	-0.938736	-2.04354	0.00265	0.0475015	yes	2.04354
TCONS_00034406	XLOC_013747	LMNB2	chr19:2428162-2456966	KO	Rescue	OK	49.4584	61.5823	0.316299	2.04352	0.0005	0.0130935	yes	2.04352
TCONS_00013018	XLOC_005203	FADS1	chr11:61567096-61634825	KO	Rescue	OK	23.6246	33.1455	0.488521	2.04314	0.0004	0.0109047	yes	2.04314
TCONS_00063058	XLOC_025627	SEC61G	chr7:54819939-54826939	KO	Rescue	OK	76.7025	58.8391	-0.382498	-2.04294	0.0003	0.00855389	yes	2.04294
TCONS_00009408	XLOC_003715	CAMK2G	chr10:75572177-75634394	KO	Rescue	OK	1.86946	4.30859	1.20459	2.04236	0.0022	0.0415626	yes	2.04236
TCONS_00012653	XLOC_005031	SPTY2D1	chr11:18621350-18656358	KO	Rescue	OK	3.3218	2.02745	-0.712303	-2.04088	0.00065	0.0160504	yes	2.04088
TCONS_00054710	XLOC_021961	-	chr5:147247060-147248005	KO	Rescue	OK	0.572661	0.232735	-1.29899	-2.03981	0.002	0.038734	yes	2.03981
TCONS_00029587	XLOC_011840	KRT19	chr17:39679868-39684641	KO	Rescue	OK	0.323763	0.121313	-1.41621	-2.03959	0.0019	0.0372657	yes	2.03959
TCONS_00035572	XLOC_014222	C19orf54	chr19:41222859-41256391	KO	Rescue	OK	4.60647	6.38614	0.471282	2.03898	0.0005	0.0130935	yes	2.03898
TCONS_00028381	XLOC_011371	C1QTNF1	chr17:77015210-77045936	KO	Rescue	OK	0.564237	0.197892	-1.51159	-2.03897	0.00185	0.0365643	yes	2.03897
TCONS_00064301	XLOC_026179	-	chr8:23336713-23349781	KO	Rescue	OK	0.276127	0.157549	-0.809527	-2.03892	0.00115	0.0252705	yes	2.03892
TCONS_00065421	XLOC_026702	TRIM35	chr8:27140932-27168834	KO	Rescue	OK	0.616559	1.08125	0.810386	2.0389	0.00125	0.0267805	yes	2.0389
TCONS_00043778	XLOC_017580	DNMT3L	chr21:45663342-45682099	KO	Rescue	OK	0.799623	1.41626	0.824689	2.03738	0.0009	0.0207972	yes	2.03738
TCONS_00024604	XLOC_009876	SLC12A3	chr16:56898699-56950012	KO	Rescue	OK	9.969	6.94587	-0.521293	-2.03646	0.0005	0.0130935	yes	2.03646
TCONS_00007727	XLOC_003105	SUPV3L1	chr10:70939992-70968849	KO	Rescue	OK	26.7927	33.4602	0.320604	2.03636	0.0003	0.00855389	yes	2.03636
TCONS_00003138	XLOC_001293	CAMK1G	chr1:209757044-209787284	KO	Rescue	OK	0.32816	0.167895	-0.966842	-2.03427	0.0009	0.0207972	yes	2.03427
TCONS_00068828	XLOC_028131	ALAD	chr9:116148591-116163620	KO	Rescue	OK	4.61178	3.37842	-0.448975	-2.03425	0.00055	0.0141432	yes	2.03425
TCONS_00003016	XLOC_001240	BTG2	chr1:203274663-203278729	KO	Rescue	OK	11.4458	9.01888	-0.343794	-2.03092	0.0004	0.0109047	yes	2.03092
TCONS_00049512	XLOC_019804	FGFR3	chr4:1794985-1810600	KO	Rescue	OK	1.24791	0.432674	-1.52816	-2.03065	0.0012	0.025911	yes	2.03065
TCONS_00067185	XLOC_027426	-	chr9:101919833-101921545	KO	Rescue	OK	0.612085	0.336384	-0.863623	-2.03027	0.0011	0.0244225	yes	2.03027
TCONS_00008637	XLOC_003459	ADARB2	chr10:1223247-1779868	KO	Rescue	OK	0.680559	0.295486	-1.20363	-2.02979	0.00155	0.0316751	yes	2.02979
TCONS_00038549	XLOC_015445	ITM2C	chr2:231729620-231743963	KO	Rescue	OK	9.91396	7.25051	-0.451379	-2.02899	0.0005	0.0130935	yes	2.02899
TCONS_00046677	XLOC_018692	-	chr3:110915855-110917463	KO	Rescue	OK	0.0145855	0.216069	3.88889	2.02758	0.0026	0.0469108	yes	2.02758
TCONS_00017700	XLOC_007012	B3GNT4	chr12:122652265-122692147	KO	Rescue	OK	0.223124	0.0648639	-1.78236	-2.02757	0.00275	0.0488394	yes	2.02757
TCONS_00011389	XLOC_004519	ALDH3B1	chr11:67776047-67796751	KO	Rescue	OK	1.54837	5.23528	1.75752	2.02722	0.0009	0.0207972	yes	2.02722
TCONS_00058148	XLOC_023366	CCNC	chr6:99990262-100016690	KO	Rescue	OK	25.8842	32.5815	0.331981	2.02707	0.00045	0.0120882	yes	2.02707
TCONS_00014601	XLOC_005797	ATF7IP	chr12:14518588-14655948	KO	Rescue	OK	2.48575	4.06356	0.709063	2.02651	0.00065	0.0160504	yes	2.02651
TCONS_00072042	XLOC_029406	LDOC1	chrX:140269930-140271310	KO	Rescue	OK	7.86235	5.96138	-0.399314	-2.02617	0.0005	0.0130935	yes	2.02617
TCONS_00004442	XLOC_001778	AK2	chr1:33473540-33502512	KO	Rescue	OK	9.62654	19.3994	1.01092	2.02592	0.0012	0.025911	yes	2.02592
TCONS_00003179	XLOC_001307	-	chr1:211752993-211755568	KO	Rescue	OK	0.365786	0.59759	0.708156	2.02567	0.00095	0.0216666	yes	2.02567
TCONS_00048660	XLOC_019471	CCDC58	chr3:122078435-122102074	KO	Rescue	OK	50.3527	63.4381	0.333282	2.02422	0.0006	0.0150866	yes	2.02422
TCONS_00070318	XLOC_028718	RAB40A	chrX:102659724-102774417	KO	Rescue	OK	0.727689	1.14028	0.647988	2.0231	0.00035	0.00974863	yes	2.0231
TCONS_00061178	XLOC_024865	C7orf41	chr7:30174551-30202381	KO	Rescue	OK	0.898186	0.612244	-0.552907	-2.02304	0.00155	0.0316751	yes	2.02304
TCONS_00036505	XLOC_014624	ID2	chr2:8822112-8824583	KO	Rescue	OK	2.11258	1.41999	-0.573129	-2.02181	0.00095	0.0216666	yes	2.02181
TCONS_00005123	XLOC_002053	TGFBR3	chr1:92145899-92371559	KO	Rescue	OK	15.7442	11.4038	-0.465299	-2.02138	0.0003	0.00855389	yes	2.02138
TCONS_00047894	XLOC_019190	HIGD1A	chr3:42824399-42846027	KO	Rescue	OK	42.9167	34.406	-0.318878	-2.02046	0.00025	0.00734573	yes	2.02046
TCONS_00014896	XLOC_005916	PRPH	chr12:49688908-49692481	KO	Rescue	OK	0.303797	0.131981	-1.20278	-2.01966	0.00195	0.0380719	yes	2.01966
TCONS_00001186	XLOC_000467	FOXD2	chr1:47897692-47906363	KO	Rescue	OK	0.493134	0.305861	-0.689102	-2.01964	0.0006	0.0150866	yes	2.01964
TCONS_00025632	XLOC_010245	NTAN1	chr16:15131709-15149936	KO	Rescue	OK	7.96063	10.7827	0.437765	2.01944	0.00065	0.0160504	yes	2.01944
TCONS_00014364	XLOC_005699	COPS7A	chr12:6833149-6841041	KO	Rescue	OK	5.65124	9.32011	0.72178	2.01868	0.00105	0.0235431	yes	2.01868
TCONS_00008207	XLOC_003289	-	chr10:102326136-102329284	KO	Rescue	OK	0.208514	0.100431	-1.05394	-2.01856	0.00185	0.0365643	yes	2.01856
TCONS_00037976	XLOC_015240	HOXD9	chr2:176968781-176989938	KO	Rescue	OK	0.24702	0.674163	1.44847	2.01827	0.00225	0.0422791	yes	2.01827
TCONS_00016841	XLOC_006685	RARG	chr12:53604338-53626374	KO	Rescue	OK	0.520811	1.61445	1.63221	2.01801	0.0023	0.0429672	yes	2.01801
TCONS_00058662	XLOC_023586	LINC00473	chr6:166319586-166403103	KO	Rescue	OK	10.6847	19.7122	0.883538	2.0172	0.0004	0.0109047	yes	2.0172
TCONS_00014949	XLOC_005937	COX14	chr12:50505763-50514240	KO	Rescue	OK	54.5108	42.8235	-0.348141	-2.01614	0.0005	0.0130935	yes	2.01614
TCONS_00058659	XLOC_023586	LINC00473	chr6:166319586-166403103	KO	Rescue	OK	7.41255	10.8109	0.54445	2.01508	0.00075	0.0180567	yes	2.01508
TCONS_00036845	XLOC_014769	PPM1B	chr2:44395462-44461742	KO	Rescue	OK	9.81797	6.92263	-0.504104	-2.01507	0.00065	0.0160504	yes	2.01507
TCONS_00000156	XLOC_000066	ARHGEF16	chr1:3370983-3397695	KO	Rescue	OK	0.868496	1.68817	0.958869	2.01498	0.00035	0.00974863	yes	2.01498
TCONS_00021909	XLOC_008826	SMAD3	chr15:67357478-67487570	KO	Rescue	OK	12.3034	9.36781	-0.39327	-2.01495	0.00035	0.00974863	yes	2.01495
TCONS_00029175	XLOC_011657	-	chr17:21095657-21096752	KO	Rescue	OK	0.149395	0.398603	1.41583	2.01436	0.0026	0.0469108	yes	2.01436
TCONS_00037462	XLOC_015028	LOC440894	chr2:110744556-110752858	KO	Rescue	OK	0.48201	0.764888	0.666185	2.01429	0.0009	0.0207972	yes	2.01429
TCONS_00019066	XLOC_007621	LOC101101776	chr14:19668001-19681016	KO	Rescue	OK	0.174375	0.323704	0.892485	2.01302	0.00145	0.0301433	yes	2.01302
TCONS_00063225	XLOC_025711	GATSL2	chr7:74807604-74867341	KO	Rescue	OK	0.559105	0.233236	-1.26133	-2.01113	0.0023	0.0429672	yes	2.01113
TCONS_00012025	XLOC_004774	UBASH3B	chr11:122526397-122685187	KO	Rescue	OK	7.06723	5.64679	-0.323713	-2.01069	0.00025	0.00734573	yes	2.01069
TCONS_00055248	XLOC_022195	EDN1	chr6:12288693-12297427	KO	Rescue	OK	1.50881	0.827191	-0.867123	-2.01059	0.00085	0.0199166	yes	2.01059
TCONS_00004594	XLOC_001839	CITED4	chr1:41326720-41328150	KO	Rescue	OK	129.925	104.513	-0.313989	-2.01042	0.0003	0.00855389	yes	2.01042
TCONS_00068030	XLOC_027754	C9orf123	chr9:7796490-7799836	KO	Rescue	OK	47.1565	36.212	-0.380988	-2.01025	0.0002	0.00609992	yes	2.01025
TCONS_00072101	XLOC_029439	CD99L2	chrX:149934808-150067289	KO	Rescue	OK	9.20256	7.24799	-0.344453	-2.01021	0.00025	0.00734573	yes	2.01021
TCONS_00064799	XLOC_026412	MATN2	chr8:98881310-99048946	KO	Rescue	OK	3.61792	2.41651	-0.582237	-2.0102	0.00075	0.0180567	yes	2.0102
TCONS_00042763	XLOC_017159	DIDO1	chr20:61505754-61569304	KO	Rescue	OK	11.8529	15.1886	0.35775	2.00972	0.00075	0.0180567	yes	2.00972
TCONS_00057836	XLOC_023237	TNFRSF21	chr6:47199267-47277680	KO	Rescue	OK	4.40277	5.8232	0.403399	2.00935	0.0006	0.0150866	yes	2.00935
TCONS_00005472	XLOC_002196	ANKRD20A12P	chr1:142689809-142713752	KO	Rescue	OK	2.44486	1.44324	-0.760437	-2.00932	0.0003	0.00855389	yes	2.00932
TCONS_00012033	XLOC_004779	GRAMD1B	chr11:123300825-123498477	KO	Rescue	OK	6.06459	4.16705	-0.541384	-2.00867	0.0005	0.0130935	yes	2.00867
TCONS_00055521	XLOC_022296	PGBD1	chr6:28248944-28273984	KO	Rescue	OK	1.51828	0.718754	-1.07887	-2.00653	0.0014	0.0292935	yes	2.00653
TCONS_00038586	XLOC_015461	ALPI	chr2:233320783-233325393	KO	Rescue	OK	1.30674	0.745494	-0.809704	-2.0065	0.00045	0.0120882	yes	2.0065
TCONS_00065298	XLOC_026648	FAM86B1	chr8:12039248-12293852	KO	Rescue	OK	0.658195	1.05111	0.675326	2.00645	0.00125	0.0267805	yes	2.00645
TCONS_00012589	XLOC_005011	PSMA1	chr11:14526418-14895561	KO	Rescue	OK	1.09256	2.64877	1.27761	2.00592	0.0007	0.0170555	yes	2.00592
TCONS_00023275	XLOC_009374	-	chr15:75877780-75884795	KO	Rescue	OK	0.497801	0.687258	0.465283	2.00362	0.00085	0.0199166	yes	2.00362
TCONS_00028138	XLOC_011289	MAP2K6	chr17:67410822-67550319	KO	Rescue	OK	3.88445	6.14305	0.661247	2.00287	0.0007	0.0170555	yes	2.00287
TCONS_00010548	XLOC_004182	-	chr11:28904740-28907031	KO	Rescue	OK	0.136504	0.286674	1.07046	2.0025	0.0016	0.03249	yes	2.0025
TCONS_00020494	XLOC_008217	ARHGAP5-AS1	chr14:32544624-32545905	KO	Rescue	OK	1.28951	0.795379	-0.69711	-2.00182	0.00075	0.0180567	yes	2.00182
TCONS_00039716	XLOC_015924	KIAA1211L	chr2:99410308-99552684	KO	Rescue	OK	0.386305	0.20084	-0.943698	-2.00135	0.0008	0.0189292	yes	2.00135
TCONS_00020712	XLOC_008323	SIX1	chr14:61111416-61116155	KO	Rescue	OK	2.68449	3.54162	0.399758	2.00089	0.00085	0.0199166	yes	2.00089
TCONS_00053062	XLOC_021274	CYSTM1	chr5:139554652-139623374	KO	Rescue	OK	71.5519	57.3282	-0.319746	-1.99897	0.00055	0.0141432	yes	1.99897
TCONS_00000815	XLOC_000326	ZBTB8A	chr1:33004759-33072008	KO	Rescue	OK	2.88391	3.70085	0.359833	1.99869	0.00065	0.0160504	yes	1.99869
TCONS_00025823	XLOC_010351	YPEL3	chr16:30103634-30107575	KO	Rescue	OK	0.888467	0.363958	-1.28755	-1.9975	0.0017	0.0341249	yes	1.9975
TCONS_00017224	XLOC_006827	CCDC59	chr12:82746082-82873016	KO	Rescue	OK	27.3644	34.8441	0.348613	1.99721	0.0006	0.0150866	yes	1.99721
TCONS_00031327	XLOC_012515	YES1	chr18:721591-812327	KO	Rescue	OK	36.3887	45.0697	0.308667	1.99711	0.00045	0.0120882	yes	1.99711
TCONS_00003022	XLOC_001243	ATP2B4	chr1:203595913-203713209	KO	Rescue	OK	8.24098	5.80926	-0.504461	-1.99614	0.0015	0.0308992	yes	1.99614
TCONS_00028171	XLOC_011307	SLC9A3R1	chr17:72744750-72765499	KO	Rescue	OK	97.3459	78.5978	-0.308631	-1.99447	0.00065	0.0160504	yes	1.99447
TCONS_00034654	XLOC_013858	ZNF558	chr19:8919114-8943167	KO	Rescue	OK	2.14014	3.10351	0.536193	1.99399	0.0009	0.0207972	yes	1.99399
TCONS_00012677	XLOC_005048	-	chr11:27312422-27316122	KO	Rescue	OK	0.297816	0.469255	0.655951	1.99363	0.0005	0.0130935	yes	1.99363
TCONS_00009071	XLOC_003606	LINC00842	chr10:47096453-47153504	KO	Rescue	OK	9.05699	12.3828	0.45123	1.99201	0.00055	0.0141432	yes	1.99201
TCONS_00043669	XLOC_017539	RIPK4	chr21:43159528-43187249	KO	Rescue	OK	0.559496	0.368172	-0.603745	-1.9913	0.001	0.0226328	yes	1.9913
TCONS_00064771	XLOC_026396	-	chr8:95961824-95962583	KO	Rescue	OK	1.02652	0.491942	-1.0612	-1.99119	0.0014	0.0292935	yes	1.99119
TCONS_00023813	XLOC_009594	PRSS21	chr16:2866761-2884568	KO	Rescue	OK	6.09827	11.5317	0.919136	1.99089	0.0011	0.0244225	yes	1.99089
TCONS_00071979	XLOC_029376	MOSPD1	chrX:134021654-134049809	KO	Rescue	OK	15.8386	12.0944	-0.389101	-1.99034	0.00065	0.0160504	yes	1.99034
TCONS_00050161	XLOC_020102	ARHGAP24	chr4:86396283-86923823	KO	Rescue	OK	0.544169	0.323998	-0.748068	-1.99014	0.00085	0.0199166	yes	1.99014
TCONS_00030625	XLOC_012250	FAM195B	chr17:79780292-79791167	KO	Rescue	OK	5.73199	4.12701	-0.47394	-1.98962	0.0004	0.0109047	yes	1.98962
TCONS_00027238	XLOC_010935	ATAD5	chr17:29158913-29233851	KO	Rescue	OK	4.57016	6.32149	0.468022	1.98936	0.00095	0.0216666	yes	1.98936
TCONS_00037051	XLOC_014858	NAGK	chr2:71295407-71305998	KO	Rescue	OK	6.94746	5.34469	-0.378381	-1.98816	0.0008	0.0189292	yes	1.98816
TCONS_00049634	XLOC_019846	SORCS2	chr4:7194241-7744564	KO	Rescue	OK	2.9501	1.85136	-0.672177	-1.98678	0.00115	0.0252705	yes	1.98678
TCONS_00043732	XLOC_017565	-	chr21:44574985-44575942	KO	Rescue	OK	0.369246	0.025452	-3.85873	-1.98642	0.00265	0.0475015	yes	1.98642
TCONS_00012427	XLOC_004942	ARFIP2	chr11:6495912-6512498	KO	Rescue	OK	5.8559	9.49663	0.697524	1.98541	0.0005	0.0130935	yes	1.98541
TCONS_00022659	XLOC_009150	RPAP1	chr15:41809374-41836464	KO	Rescue	OK	10.1535	12.6444	0.316518	1.98528	0.0006	0.0150866	yes	1.98528
TCONS_00065623	XLOC_026781	ATP6V1H	chr8:54628102-54756096	KO	Rescue	OK	36.1621	28.4419	-0.346457	-1.98509	0.00035	0.00974863	yes	1.98509
TCONS_00047250	XLOC_018939	FNDC3B	chr3:171757417-172118492	KO	Rescue	OK	15.7565	12.2542	-0.362672	-1.98478	0.0006	0.0150866	yes	1.98478
TCONS_00037553	XLOC_015072	STEAP3	chr2:119981201-120024821	KO	Rescue	OK	15.1992	11.6498	-0.383688	-1.98445	0.00045	0.0120882	yes	1.98445
TCONS_00017570	XLOC_006959	-	chr12:114181226-114211516	KO	Rescue	OK	1.89359	2.54528	0.4267	1.98434	0.0005	0.0130935	yes	1.98434
TCONS_00071820	XLOC_029315	CUL4B	chrX:119658416-119709684	KO	Rescue	OK	5.37428	8.50118	0.66159	1.98326	0.00085	0.0199166	yes	1.98326
TCONS_00010845	XLOC_004312	RTN4RL2	chr11:57227560-57245009	KO	Rescue	OK	6.82074	14.3773	1.07579	1.98249	0.00105	0.0235431	yes	1.98249
TCONS_00063841	XLOC_025973	ZC3HAV1L	chr7:138706241-138721017	KO	Rescue	OK	6.83015	8.50999	0.317239	1.98078	0.00055	0.0141432	yes	1.98078
TCONS_00005441	XLOC_002182	-	chr1:119558890-119565185	KO	Rescue	OK	0.488096	0.680258	0.478917	1.98033	0.0005	0.0130935	yes	1.98033
TCONS_00058337	XLOC_023440	ARHGAP18	chr6:129897277-130031435	KO	Rescue	OK	0.907131	2.47754	1.44953	1.98002	0.00215	0.0409798	yes	1.98002
TCONS_00024323	XLOC_009763	MVP	chr16:29823408-29859451	KO	Rescue	OK	6.4513	3.75482	-0.780847	-1.97908	0.00035	0.00974863	yes	1.97908
TCONS_00072256	XLOC_029495	F8	chrX:154064063-154250998	KO	Rescue	OK	0.642138	0.302334	-1.08674	-1.97886	0.0019	0.0372657	yes	1.97886
TCONS_00035346	XLOC_014136	-	chr19:36755259-36757604	KO	Rescue	OK	3.19714	4.19791	0.392892	1.97866	0.0006	0.0150866	yes	1.97866
TCONS_00015577	XLOC_006184	DRAM1	chr12:102270975-102317402	KO	Rescue	OK	11.2788	8.8493	-0.349983	-1.97657	0.00065	0.0160504	yes	1.97657
TCONS_00069033	XLOC_028201	AK1	chr9:130628758-130640022	KO	Rescue	OK	28.0349	22.543	-0.314548	-1.97522	0.00075	0.0180567	yes	1.97522
TCONS_00042925	XLOC_017221	NCAM2	chr21:22370632-22912517	KO	Rescue	OK	0.253286	0.0916818	-1.46606	-1.9742	0.0021	0.0402058	yes	1.9742
TCONS_00018849	XLOC_007503	KLF12	chr13:74260009-74708621	KO	Rescue	OK	0.51298	0.796953	0.635592	1.97398	0.00065	0.0160504	yes	1.97398
TCONS_00004014	XLOC_001634	-	chr1:17215030-17216172	KO	Rescue	OK	2.88505	1.25528	-1.20059	-1.97372	0.0026	0.0469108	yes	1.97372
TCONS_00064116	XLOC_026110	CLDN23	chr8:8559665-8561617	KO	Rescue	OK	1.0176	0.659489	-0.625744	-1.97339	0.00095	0.0216666	yes	1.97339
TCONS_00026052	XLOC_010462	CNOT1	chr16:58549382-58663795	KO	Rescue	OK	36.0061	47.2346	0.391605	1.97289	0.00065	0.0160504	yes	1.97289
TCONS_00016496	XLOC_006546	TMTC1	chr12:29653745-29937692	KO	Rescue	OK	2.72136	3.73885	0.458266	1.97212	0.0004	0.0109047	yes	1.97212
TCONS_00068507	XLOC_027989	GOLM1	chr9:88555980-88715116	KO	Rescue	OK	30.4616	39.7699	0.384683	1.9718	0.0006	0.0150866	yes	1.9718
TCONS_00011678	XLOC_004624	FZD4	chr11:86650167-86666443	KO	Rescue	OK	0.539104	1.38275	1.35891	1.97178	0.00075	0.0180567	yes	1.97178
TCONS_00050109	XLOC_020076	STBD1	chr4:77135192-77232283	KO	Rescue	OK	2.93365	3.82005	0.380892	1.97116	0.00065	0.0160504	yes	1.97116
TCONS_00029015	XLOC_011590	-	chr17:10575838-10579499	KO	Rescue	OK	3.10747	3.99608	0.362846	1.97084	0.00095	0.0216666	yes	1.97084
TCONS_00023474	XLOC_009465	C15orf38	chr15:90373781-90456232	KO	Rescue	OK	2.38381	5.30902	1.15518	1.96936	0.0013	0.0276517	yes	1.96936
TCONS_00055568	XLOC_022314	HLA-A	chr6:29691116-29913661	KO	Rescue	OK	43.9581	58.0514	0.4012	1.96899	0.00075	0.0180567	yes	1.96899
TCONS_00050720	XLOC_020312	CDKN2AIP	chr4:184364838-184370462	KO	Rescue	OK	14.357	18.5503	0.369684	1.96893	0.0005	0.0130935	yes	1.96893
TCONS_00049963	XLOC_020001	SRD5A3	chr4:56212269-56251747	KO	Rescue	OK	6.09834	4.80689	-0.343313	-1.96813	0.00055	0.0141432	yes	1.96813
TCONS_00031873	XLOC_012729	MBP	chr18:74690788-74844800	KO	Rescue	OK	3.5316	2.70983	-0.38212	-1.96782	0.00065	0.0160504	yes	1.96782
TCONS_00003827	XLOC_001557	ICMT	chr1:6265570-6296127	KO	Rescue	OK	33.2418	26.1584	-0.345723	-1.96743	0.0005	0.0130935	yes	1.96743
TCONS_00027142	XLOC_010893	NLK	chr17:26368750-26531967	KO	Rescue	OK	2.65959	7.2148	1.43975	1.96635	0.00135	0.0284327	yes	1.96635
TCONS_00043016	XLOC_017271	SMIM11	chr21:35747748-35761452	KO	Rescue	OK	17.5785	22.434	0.351873	1.96536	0.00135	0.0284327	yes	1.96536
TCONS_00034627	XLOC_013846	TIMM44	chr19:7991602-8008708	KO	Rescue	OK	32.8543	40.7253	0.309842	1.96471	0.0007	0.0170555	yes	1.96471
TCONS_00049348	XLOC_019746	PPP1R2	chr3:195241220-195270224	KO	Rescue	OK	35.7485	44.1544	0.304677	1.96444	0.0007	0.0170555	yes	1.96444
TCONS_00040713	XLOC_016324	-	chr2:224461581-224588772	KO	Rescue	OK	2.00108	1.34074	-0.577746	-1.9637	0.0009	0.0207972	yes	1.9637
TCONS_00000395	XLOC_000165	PLEKHM2	chr1:16010792-16061266	KO	Rescue	OK	10.8977	7.99966	-0.446007	-1.96349	0.0009	0.0207972	yes	1.96349
TCONS_00018678	XLOC_007425	TSC22D1	chr13:45006278-45154568	KO	Rescue	OK	183.995	147.067	-0.32319	-1.9629	0.00065	0.0160504	yes	1.9629
TCONS_00056818	XLOC_022836	MRPL18	chr6:160210823-160219461	KO	Rescue	OK	16.4612	26.756	0.700795	1.96272	0.00085	0.0199166	yes	1.96272
TCONS_00018482	XLOC_007347	LATS2	chr13:21547175-21635722	KO	Rescue	OK	22.1734	17.9354	-0.306022	-1.96193	0.0007	0.0170555	yes	1.96193
TCONS_00066505	XLOC_027146	VLDLR	chr9:2535654-2656199	KO	Rescue	OK	7.85507	5.44393	-0.528975	-1.96143	0.0004	0.0109047	yes	1.96143
TCONS_00048484	XLOC_019398	CPOX	chr3:98298289-98312455	KO	Rescue	OK	11.4911	14.3537	0.320915	1.96082	0.0008	0.0189292	yes	1.96082
TCONS_00065606	XLOC_026774	SNAI2	chr8:49830238-49833999	KO	Rescue	OK	2.0539	2.78333	0.438447	1.96062	0.00095	0.0216666	yes	1.96062
TCONS_00013292	XLOC_005300	ZDHHC24	chr11:66305217-66313690	KO	Rescue	OK	6.44432	4.70519	-0.453776	-1.9602	0.0003	0.00855389	yes	1.9602
TCONS_00004930	XLOC_001967	MIR3671	chr1:65520219-65524112	KO	Rescue	OK	0.300044	0.465968	0.635058	1.95987	0.0009	0.0207972	yes	1.95987
TCONS_00014287	XLOC_005662	FKBP4	chr12:2904099-2914587	KO	Rescue	OK	47.2899	72.3985	0.614429	1.95969	0.0009	0.0207972	yes	1.95969
TCONS_00020818	XLOC_008365	MAP3K9	chr14:71189240-71276302	KO	Rescue	OK	0.56196	0.236591	-1.24807	-1.95783	0.0004	0.0109047	yes	1.95783
TCONS_00038839	XLOC_015553	MBOAT2	chr2:8992852-9144035	KO	Rescue	OK	0.770937	0.520071	-0.567903	-1.95594	0.00115	0.0252705	yes	1.95594
TCONS_00020820	XLOC_008365	MAP3K9	chr14:71189240-71276302	KO	Rescue	OK	0.626283	1.29773	1.0511	1.95576	0.00025	0.00734573	yes	1.95576
TCONS_00020556	XLOC_008253	MDGA2	chr14:47308827-48144157	KO	Rescue	OK	0.160788	0.273988	0.768955	1.95525	0.00085	0.0199166	yes	1.95525
TCONS_00066936	XLOC_027327	OSTF1	chr9:77703397-77762114	KO	Rescue	OK	14.5971	11.4575	-0.349391	-1.95432	0.00055	0.0141432	yes	1.95432
TCONS_00027950	XLOC_011209	AKAP1	chr17:55162542-55243067	KO	Rescue	OK	22.7576	29.5391	0.376279	1.953	0.00135	0.0284327	yes	1.953
TCONS_00029449	XLOC_011765	PCGF2	chr17:36886491-36906136	KO	Rescue	OK	9.54906	14.6399	0.616472	1.95291	0.0014	0.0292935	yes	1.95291
TCONS_00063380	XLOC_025782	ASNS	chr7:97481428-97501854	KO	Rescue	OK	17.9754	23.0469	0.358551	1.95216	0.00075	0.0180567	yes	1.95216
TCONS_00048795	XLOC_019523	-	chr3:129092680-129094845	KO	Rescue	OK	0.228112	0.0993238	-1.19953	-1.95188	0.0028	0.0494992	yes	1.95188
TCONS_00007862	XLOC_003156	PPIF	chr10:81107219-81115089	KO	Rescue	OK	89.4134	110.207	0.301649	1.95079	0.00095	0.0216666	yes	1.95079
TCONS_00037799	XLOC_015170	GPD2	chr2:157291589-157442915	KO	Rescue	OK	12.9075	16.677	0.369645	1.94976	0.0007	0.0170555	yes	1.94976
TCONS_00028579	XLOC_011440	-	chr17:633467-635326	KO	Rescue	OK	0.298154	0.136982	-1.12207	-1.94934	0.0021	0.0402058	yes	1.94934
TCONS_00019061	XLOC_007617	RASA3	chr13:114747190-114898095	KO	Rescue	OK	6.27469	8.46208	0.431469	1.94883	0.0006	0.0150866	yes	1.94883
TCONS_00037943	XLOC_015220	PDK1	chr2:173420602-173493251	KO	Rescue	OK	3.71132	4.79211	0.368729	1.94757	0.0006	0.0150866	yes	1.94757
TCONS_00045423	XLOC_018242	LDOC1L	chr22:44888449-44894005	KO	Rescue	OK	14.9721	18.4911	0.304552	1.94757	0.0008	0.0189292	yes	1.94757
TCONS_00013009	XLOC_005199	CPSF7	chr11:61170119-61197464	KO	Rescue	OK	31.6418	41.7245	0.399063	1.94755	0.0009	0.0207972	yes	1.94755
TCONS_00067291	XLOC_027461	GNG10	chr9:114393631-114434849	KO	Rescue	OK	5.67885	10.861	0.935487	1.9475	0.0008	0.0189292	yes	1.9475
TCONS_00035742	XLOC_014299	PPP1R13L	chr19:45882891-45952508	KO	Rescue	OK	6.19983	10.4908	0.758828	1.94712	0.00135	0.0284327	yes	1.94712
TCONS_00030648	XLOC_012257	MAFG	chr17:79869812-79885657	KO	Rescue	OK	2.09701	3.86068	0.880523	1.94705	0.00115	0.0252705	yes	1.94705
TCONS_00021557	XLOC_008696	RTF1	chr15:41709301-41775761	KO	Rescue	OK	32.2057	39.6798	0.301087	1.94699	0.00065	0.0160504	yes	1.94699
TCONS_00020787	XLOC_008353	ACTN1	chr14:69340839-69446083	KO	Rescue	OK	71.3874	57.8646	-0.302988	-1.94672	0.0008	0.0189292	yes	1.94672
TCONS_00062196	XLOC_025272	MEST	chr7:130126015-130371406	KO	Rescue	OK	18.0916	23.4081	0.37169	1.9464	0.00105	0.0235431	yes	1.9464
TCONS_00069880	XLOC_028537	CCDC22	chrX:49091926-49121288	KO	Rescue	OK	6.2487	7.98536	0.353801	1.9464	0.0009	0.0207972	yes	1.9464
TCONS_00071088	XLOC_029019	APOO	chrX:23851464-23957624	KO	Rescue	OK	15.2207	8.47036	-0.845536	-1.94624	0.001	0.0226328	yes	1.94624
TCONS_00006296	XLOC_002515	KIFAP3	chr1:169890469-170043879	KO	Rescue	OK	9.42873	7.42913	-0.343869	-1.94577	0.00075	0.0180567	yes	1.94577
TCONS_00028981	XLOC_011573	MYH10	chr17:8377522-8534966	KO	Rescue	OK	14.5191	11.294	-0.362394	-1.94539	0.00055	0.0141432	yes	1.94539
TCONS_00061264	XLOC_024903	RALA	chr7:39663151-39747723	KO	Rescue	OK	14.2395	17.691	0.313113	1.94482	0.00075	0.0180567	yes	1.94482
TCONS_00031219	XLOC_012466	ZCCHC2	chr18:60189559-60245849	KO	Rescue	OK	4.99714	6.38332	0.353206	1.94472	0.00055	0.0141432	yes	1.94472
TCONS_00049308	XLOC_019730	-	chr3:193848441-193852122	KO	Rescue	OK	0.285888	0.164902	-0.79384	-1.94461	0.0009	0.0207972	yes	1.94461
TCONS_00017623	XLOC_006982	TAOK3	chr12:118587605-118810750	KO	Rescue	OK	15.306	18.9204	0.305851	1.94438	0.0007	0.0170555	yes	1.94438
TCONS_00020360	XLOC_008163	CDH24	chr14:23516269-23527066	KO	Rescue	OK	1.69077	1.0866	-0.637859	-1.94398	0.00165	0.0332947	yes	1.94398
TCONS_00041417	XLOC_016629	MYL9	chr20:35169886-35178226	KO	Rescue	OK	6.40176	3.5491	-0.851014	-1.94344	0.00255	0.0464657	yes	1.94344
TCONS_00006976	XLOC_002812	CEP170	chr1:243287648-243419103	KO	Rescue	OK	0.321138	1.11844	1.80022	1.94327	0.00185	0.0365643	yes	1.94327
TCONS_00009631	XLOC_003814	ARHGAP19	chr10:98757794-99052430	KO	Rescue	OK	4.75242	6.18649	0.380458	1.94311	0.00045	0.0120882	yes	1.94311
TCONS_00023742	XLOC_009570	SYNGR3	chr16:2039945-2044276	KO	Rescue	OK	1.48175	2.06272	0.477242	1.94251	0.0011	0.0244225	yes	1.94251
TCONS_00026512	XLOC_010646	APRT	chr16:88875876-88878342	KO	Rescue	OK	46.3884	71.4197	0.622559	1.94219	0.00065	0.0160504	yes	1.94219
TCONS_00055459	XLOC_022280	HIST1H2AI	chr6:27775969-27779603	KO	Rescue	OK	0.331145	0.524929	0.664658	1.94201	0.00085	0.0199166	yes	1.94201
TCONS_00061291	XLOC_024911	STK17A	chr7:43622681-43769333	KO	Rescue	OK	4.97652	2.1039	-1.24207	-1.94198	0.00225	0.0422791	yes	1.94198
TCONS_00056662	XLOC_022773	PHACTR2	chr6:143929316-144152322	KO	Rescue	OK	3.20714	1.9122	-0.746053	-1.94143	0.00195	0.0380719	yes	1.94143
TCONS_00064737	XLOC_026382	DECR1	chr8:91013570-91065387	KO	Rescue	OK	20.0509	15.8652	-0.3378	-1.9407	0.00075	0.0180567	yes	1.9407
TCONS_00057005	XLOC_022925	SLC35B3	chr6:8411770-8435818	KO	Rescue	OK	4.7963	3.35458	-0.515789	-1.94045	0.0008	0.0189292	yes	1.94045
TCONS_00000631	XLOC_000258	CEP85	chr1:26560655-26605334	KO	Rescue	OK	7.84992	9.94574	0.3414	1.94042	0.0008	0.0189292	yes	1.94042
TCONS_00042564	XLOC_017092	PREX1	chr20:47240792-47444854	KO	Rescue	OK	2.44687	3.36081	0.457873	1.94036	0.0012	0.025911	yes	1.94036
TCONS_00020710	XLOC_008321	DHRS7	chr14:60611499-60632211	KO	Rescue	OK	17.8841	14.1878	-0.334025	-1.9385	0.00065	0.0160504	yes	1.9385
TCONS_00005448	XLOC_002187	ZNF697	chr1:120161999-120191066	KO	Rescue	OK	2.01714	1.07682	-0.905535	-1.93733	0.00085	0.0199166	yes	1.93733
TCONS_00048454	XLOC_019383	GBE1	chr3:81538849-81810950	KO	Rescue	OK	17.8176	14.3727	-0.309976	-1.93703	0.0008	0.0189292	yes	1.93703
TCONS_00053734	XLOC_021555	ANKH	chr5:14704908-14871887	KO	Rescue	OK	8.08198	10.0675	0.316926	1.93699	0.0008	0.0189292	yes	1.93699
TCONS_00064823	XLOC_026421	-	chr8:101348202-101364133	KO	Rescue	OK	0.296503	0.10285	-1.5275	-1.93684	0.00155	0.0316751	yes	1.93684
TCONS_00056666	XLOC_022776	STX11	chr6:144471653-144513076	KO	Rescue	OK	1.06186	0.783826	-0.437983	-1.9359	0.00075	0.0180567	yes	1.9359
TCONS_00046746	XLOC_018720	ARHGAP31	chr3:119013219-119138662	KO	Rescue	OK	0.492287	0.325255	-0.597928	-1.93469	0.0006	0.0150866	yes	1.93469
TCONS_00004883	XLOC_001941	DHCR24	chr1:55315267-55354616	KO	Rescue	OK	104.337	84.295	-0.30773	-1.93406	0.00055	0.0141432	yes	1.93406
TCONS_00071670	XLOC_029256	MORF4L2	chrX:102930425-102947484	KO	Rescue	OK	104.75	71.7825	-0.545249	-1.93238	0.001	0.0226328	yes	1.93238
TCONS_00010568	XLOC_004194	TCP11L1	chr11:33060962-33095543	KO	Rescue	OK	3.3495	2.13307	-0.651011	-1.93218	0.0018	0.035815	yes	1.93218
TCONS_00017425	XLOC_006905	SLC41A2	chr12:105195572-105352530	KO	Rescue	OK	4.02614	2.40087	-0.745841	-1.93197	0.00105	0.0235431	yes	1.93197
TCONS_00063145	XLOC_025676	-	chr7:66375002-66376518	KO	Rescue	OK	0.215132	0.0149136	-3.85052	-1.93136	0.00265	0.0475015	yes	1.93136
TCONS_00012584	XLOC_005011	PSMA1	chr11:14526418-14895561	KO	Rescue	OK	193.096	247.479	0.357985	1.93025	0.0007	0.0170555	yes	1.93025
TCONS_00064898	XLOC_026460	MED30	chr8:118532964-118552501	KO	Rescue	OK	5.408	7.25208	0.4233	1.93003	0.0007	0.0170555	yes	1.93003
TCONS_00011891	XLOC_004733	CEP164	chr11:117192493-117283982	KO	Rescue	OK	1.47059	0.783516	-0.908365	-1.92962	0.0011	0.0244225	yes	1.92962
TCONS_00002181	XLOC_000895	-	chr1:151093456-151098013	KO	Rescue	OK	1.48018	1.93815	0.388904	1.92953	0.0005	0.0130935	yes	1.92953
TCONS_00032714	XLOC_013059	GATAD2A	chr19:19496490-19619741	KO	Rescue	OK	2.08369	4.40233	1.07913	1.92886	0.0017	0.0341249	yes	1.92886
TCONS_00024649	XLOC_009893	KATNB1	chr16:57769638-57791162	KO	Rescue	OK	10.6136	14.0772	0.407442	1.92856	0.0009	0.0207972	yes	1.92856
TCONS_00015004	XLOC_005955	SCN8A	chr12:51923735-52206648	KO	Rescue	OK	0.805011	0.223625	-1.84793	-1.92833	0.0007	0.0170555	yes	1.92833
TCONS_00041363	XLOC_016617	PROCR	chr20:33759646-33765165	KO	Rescue	OK	9.96636	13.7551	0.464825	1.92785	0.00115	0.0252705	yes	1.92785
TCONS_00028389	XLOC_011374	CBX2	chr17:77751810-77762107	KO	Rescue	OK	24.1154	30.0626	0.318013	1.92778	0.0003	0.00855389	yes	1.92778
TCONS_00011977	XLOC_004758	NLRX1	chr11:119039225-119054725	KO	Rescue	OK	1.88213	0.885445	-1.08789	-1.92678	0.0028	0.0494992	yes	1.92678
TCONS_00005770	XLOC_002334	S100A6	chr1:153506896-153509000	KO	Rescue	OK	363.416	295.575	-0.2981	-1.92651	0.00095	0.0216666	yes	1.92651
TCONS_00020848	XLOC_008376	ELMSAN1	chr14:74181824-74254378	KO	Rescue	OK	8.85199	6.74288	-0.392637	-1.92621	0.00115	0.0252705	yes	1.92621
TCONS_00015409	XLOC_006106	TMEM19	chr12:72079802-72099273	KO	Rescue	OK	10.7911	8.66497	-0.316582	-1.92535	0.0006	0.0150866	yes	1.92535
TCONS_00005414	XLOC_002169	IGSF3	chr1:117115976-117210374	KO	Rescue	OK	8.3516	6.20327	-0.429023	-1.92414	0.00065	0.0160504	yes	1.92414
TCONS_00015045	XLOC_005968	KRT18	chr12:53290970-53346685	KO	Rescue	OK	2227.88	1497.56	-0.573052	-1.92139	0.0009	0.0207972	yes	1.92139
TCONS_00052140	XLOC_020901	MTRR	chr5:7869216-7901235	KO	Rescue	OK	19.0265	26.2032	0.46173	1.92121	0.00115	0.0252705	yes	1.92121
TCONS_00042108	XLOC_016900	FERMT1	chr20:6055491-6104253	KO	Rescue	OK	6.50699	8.90257	0.452232	1.92003	0.0012	0.025911	yes	1.92003
TCONS_00017983	XLOC_007130	RFC3	chr13:34392115-34540695	KO	Rescue	OK	31.3393	39.612	0.337966	1.91986	0.00065	0.0160504	yes	1.91986
TCONS_00042068	XLOC_016882	C20orf27	chr20:3734145-3749035	KO	Rescue	OK	47.1026	58.3228	0.308255	1.91986	0.00055	0.0141432	yes	1.91986
TCONS_00051189	XLOC_020513	EPHA5	chr4:66185280-66574210	KO	Rescue	OK	1.31198	2.00089	0.608898	1.91979	0.0012	0.025911	yes	1.91979
TCONS_00053275	XLOC_021340	ARHGEF37	chr5:148960923-149014527	KO	Rescue	OK	0.271173	0.114533	-1.24345	-1.91914	0.0028	0.0494992	yes	1.91914
TCONS_00009115	XLOC_003627	-	chr10:50638594-50655661	KO	Rescue	OK	2.0883	1.67507	-0.318103	-1.91876	0.0009	0.0207972	yes	1.91876
TCONS_00053225	XLOC_021315	NDFIP1	chr5:141488323-141534008	KO	Rescue	OK	42.8686	34.8847	-0.297327	-1.91876	0.0009	0.0207972	yes	1.91876
TCONS_00047512	XLOC_019052	FYTTD1	chr3:197398238-197511317	KO	Rescue	OK	32.4357	25.7194	-0.334725	-1.91805	0.00135	0.0284327	yes	1.91805
TCONS_00047208	XLOC_018918	PPM1L	chr3:160472990-160796688	KO	Rescue	OK	4.65943	3.66275	-0.347226	-1.91799	0.00105	0.0235431	yes	1.91799
TCONS_00019187	XLOC_007681	PSME1	chr14:24605377-24610812	KO	Rescue	OK	62.8143	78.6242	0.323879	1.91712	0.00045	0.0120882	yes	1.91712
TCONS_00055837	XLOC_022410	UHRF1BP1	chr6:34759793-34845291	KO	Rescue	OK	11.9232	14.6507	0.297198	1.91625	0.00095	0.0216666	yes	1.91625
TCONS_00071769	XLOC_029288	-	chrX:114752587-114754024	KO	Rescue	OK	0.267886	0.519722	0.956121	1.91625	0.00215	0.0409798	yes	1.91625
TCONS_00054344	XLOC_021819	CCDC112	chr5:114602348-114632458	KO	Rescue	OK	3.64029	4.85771	0.416225	1.91602	0.0008	0.0189292	yes	1.91602
TCONS_00034753	XLOC_013898	KEAP1	chr19:10596775-10614054	KO	Rescue	OK	21.4656	28.6561	0.416817	1.91523	0.00075	0.0180567	yes	1.91523
TCONS_00032718	XLOC_013060	YJEFN3	chr19:19625027-19648695	KO	Rescue	OK	1.11353	2.0491	0.879851	1.91505	0.00105	0.0235431	yes	1.91505
TCONS_00034042	XLOC_013610	ZNF444	chr19:56652351-56672264	KO	Rescue	OK	1.60759	3.01982	0.909557	1.91482	0.00225	0.0422791	yes	1.91482
TCONS_00028402	XLOC_011378	GAA	chr17:78075354-78093679	KO	Rescue	OK	5.05324	7.6514	0.598514	1.91396	0.00115	0.0252705	yes	1.91396
TCONS_00022872	XLOC_009234	MYO5C	chr15:52484449-52588076	KO	Rescue	OK	14.9028	18.6124	0.320677	1.91298	0.0009	0.0207972	yes	1.91298
TCONS_00030826	XLOC_012330	ARHGAP28	chr18:6728982-6915713	KO	Rescue	OK	0.453335	1.07605	1.2471	1.91212	0.0016	0.03249	yes	1.91212
TCONS_00033143	XLOC_013220	PLEKHG2	chr19:39903045-39919055	KO	Rescue	OK	1.26694	1.75866	0.473136	1.91072	0.0008	0.0189292	yes	1.91072
TCONS_00070995	XLOC_028990	PIR	chrX:15363712-15511711	KO	Rescue	OK	24.4835	31.2349	0.351349	1.9105	0.00115	0.0252705	yes	1.9105
TCONS_00040268	XLOC_016146	GPR155	chr2:175295266-175351816	KO	Rescue	OK	0.676774	0.972604	0.523179	1.91028	0.001	0.0226328	yes	1.91028
TCONS_00051702	XLOC_020725	MAML3	chr4:140586718-141075503	KO	Rescue	OK	0.877062	0.510741	-0.780087	-1.90959	0.0012	0.025911	yes	1.90959
TCONS_00039340	XLOC_015759	VPS54	chr2:64119666-64246214	KO	Rescue	OK	6.15975	4.58421	-0.4262	-1.90881	0.00095	0.0216666	yes	1.90881
TCONS_00033508	XLOC_013345	CCDC9	chr19:47759594-47777552	KO	Rescue	OK	6.4558	4.36239	-0.565479	-1.90787	0.00095	0.0216666	yes	1.90787
TCONS_00001064	XLOC_000423	DPH2	chr1:44435652-44439043	KO	Rescue	OK	24.3825	30.0814	0.303027	1.90777	0.0006	0.0150866	yes	1.90777
TCONS_00017816	XLOC_007047	-	chr12:127650865-127650989	KO	Rescue	OK	12137.3	14986.7	0.304241	1.90619	0.00105	0.0235431	yes	1.90619
TCONS_00057921	XLOC_023274	LGSN	chr6:63982082-64260538	KO	Rescue	OK	1.21667	0.744697	-0.708211	-1.90529	0.0013	0.0276517	yes	1.90529
TCONS_00030861	XLOC_012343	NAPG	chr18:10525872-10552766	KO	Rescue	OK	8.56423	6.87689	-0.316568	-1.90521	0.0008	0.0189292	yes	1.90521
TCONS_00007188	XLOC_002895	LINC00707	chr10:6821559-6884868	KO	Rescue	OK	0.931168	1.36986	0.556917	1.9049	0.0007	0.0170555	yes	1.9049
TCONS_00011529	XLOC_004562	P2RY6	chr11:72975569-73014576	KO	Rescue	OK	6.0483	9.04485	0.580567	1.9037	0.0005	0.0130935	yes	1.9037
TCONS_00051183	XLOC_020509	IGFBP7	chr4:57829515-58071465	KO	Rescue	OK	45.5949	24.0749	-0.921342	-1.90368	0.0026	0.0469108	yes	1.90368
TCONS_00010237	XLOC_004041	CD81	chr11:2398546-2418649	KO	Rescue	OK	107.524	87.6339	-0.295103	-1.90273	0.0007	0.0170555	yes	1.90273
TCONS_00005415	XLOC_002169	IGSF3	chr1:117115976-117210374	KO	Rescue	OK	4.5243	2.92972	-0.626931	-1.90188	0.00085	0.0199166	yes	1.90188
TCONS_00043776	XLOC_017579	ICOSLG	chr21:45642583-45661330	KO	Rescue	OK	3.21123	4.85328	0.595833	1.90118	0.0008	0.0189292	yes	1.90118
TCONS_00048483	XLOC_019397	CLDND1	chr3:98234316-98241910	KO	Rescue	OK	3.69953	2.12133	-0.802374	-1.90112	0.00145	0.0301433	yes	1.90112
TCONS_00048573	XLOC_019441	-	chr3:113432194-113433277	KO	Rescue	OK	1.61942	2.39577	0.565016	1.89947	0.00135	0.0284327	yes	1.89947
TCONS_00071025	XLOC_029001	PHKA2	chrX:18900699-19003117	KO	Rescue	OK	5.40122	7.43872	0.461768	1.8992	0.00085	0.0199166	yes	1.8992
TCONS_00016036	XLOC_006361	PXMP2	chr12:133264191-133281577	KO	Rescue	OK	24.6627	19.5935	-0.331954	-1.89821	0.0012	0.025911	yes	1.89821
TCONS_00068288	XLOC_027876	TPM2	chr9:35681989-35691128	KO	Rescue	OK	192.687	152.435	-0.338062	-1.89723	0.0008	0.0189292	yes	1.89723
TCONS_00071882	XLOC_029344	ZNF280C	chrX:129336629-129402922	KO	Rescue	OK	1.62987	2.14822	0.398389	1.89714	0.0012	0.025911	yes	1.89714
TCONS_00043400	XLOC_017426	BTG3	chr21:18965967-18985268	KO	Rescue	OK	36.2947	28.5471	-0.346414	-1.89688	0.00095	0.0216666	yes	1.89688
TCONS_00010740	XLOC_004259	-	chr11:46946399-46951173	KO	Rescue	OK	0.539057	0.752526	0.481305	1.89672	0.00105	0.0235431	yes	1.89672
TCONS_00050971	XLOC_020424	FGFBP1	chr4:15937192-15940363	KO	Rescue	OK	2.3004	1.6009	-0.522997	-1.89668	0.0017	0.0341249	yes	1.89668
TCONS_00016360	XLOC_006487	DUSP16	chr12:12510019-12715448	KO	Rescue	OK	17.0521	12.9092	-0.401551	-1.89633	0.0012	0.025911	yes	1.89633
TCONS_00039537	XLOC_015848	TRABD2A	chr2:85048778-85108528	KO	Rescue	OK	15.963	20.5552	0.364768	1.89514	0.00105	0.0235431	yes	1.89514
TCONS_00020898	XLOC_008391	ACYP1	chr14:75519927-75530736	KO	Rescue	OK	12.4092	8.9966	-0.463954	-1.89472	0.00075	0.0180567	yes	1.89472
TCONS_00004087	XLOC_001664	HP1BP3	chr1:21068062-21114018	KO	Rescue	OK	6.27521	3.66564	-0.7756	-1.89359	0.0019	0.0372657	yes	1.89359
TCONS_00040817	XLOC_016382	MSL3P1	chr2:234774089-234777055	KO	Rescue	OK	3.20165	4.19382	0.38945	1.89255	0.00115	0.0252705	yes	1.89255
TCONS_00012992	XLOC_005193	PRPF19	chr11:60658019-60674061	KO	Rescue	OK	126.208	154.619	0.292909	1.89039	0.0011	0.0244225	yes	1.89039
TCONS_00033723	XLOC_013441	ZNF473	chr19:50529211-50552031	KO	Rescue	OK	2.53119	3.83561	0.599644	1.89018	0.0024	0.0443833	yes	1.89018
TCONS_00004118	XLOC_001667	RAP1GAP	chr1:21922707-21995856	KO	Rescue	OK	0.185239	0.816544	2.14014	1.88987	0.00105	0.0235431	yes	1.88987
TCONS_00013599	XLOC_005437	CCDC90B	chr11:82971040-82997436	KO	Rescue	OK	0.811917	1.44697	0.833633	1.88976	0.00175	0.0350009	yes	1.88976
TCONS_00030048	XLOC_012035	MMD	chr17:53469973-53499360	KO	Rescue	OK	4.09211	2.87747	-0.508045	-1.8885	0.00205	0.0394643	yes	1.8885
TCONS_00011601	XLOC_004594	TSKU	chr11:76493356-76509198	KO	Rescue	OK	21.1342	26.0269	0.300423	1.88702	0.0011	0.0244225	yes	1.88702
TCONS_00027845	XLOC_011184	RSAD1	chr17:48556168-48563337	KO	Rescue	OK	11.779	14.8461	0.333858	1.88578	0.0009	0.0207972	yes	1.88578
TCONS_00011017	XLOC_004380	FEN1	chr11:61560108-61564714	KO	Rescue	OK	98.5405	120.601	0.291447	1.8857	0.0006	0.0150866	yes	1.8857
TCONS_00047066	XLOC_018856	PLS1	chr3:142315228-142432505	KO	Rescue	OK	5.1276	4.07058	-0.333047	-1.88567	0.0008	0.0189292	yes	1.88567
TCONS_00035092	XLOC_014029	CRLF1	chr19:18704034-18717774	KO	Rescue	OK	26.2379	19.8404	-0.403215	-1.88526	0.0008	0.0189292	yes	1.88526
TCONS_00047730	XLOC_019136	-	chr3:20195896-20198725	KO	Rescue	OK	0.2231	0.379542	0.766567	1.88456	0.00185	0.0365643	yes	1.88456
TCONS_00035345	XLOC_014135	-	chr19:36744479-36753767	KO	Rescue	OK	0.57136	0.75781	0.407438	1.88445	0.00165	0.0332947	yes	1.88445
TCONS_00008267	XLOC_003313	NFKB2	chr10:104153866-104162286	KO	Rescue	OK	24.9273	18.2253	-0.451784	-1.88427	0.00125	0.0267805	yes	1.88427
TCONS_00055265	XLOC_022200	CD83	chr6:14117486-14137148	KO	Rescue	OK	4.45286	2.02539	-1.13653	-1.88427	0.00265	0.0475015	yes	1.88427
TCONS_00031315	XLOC_012508	ADNP2	chr18:77866914-77898228	KO	Rescue	OK	7.8496	9.67766	0.302039	1.88332	0.0015	0.0308992	yes	1.88332
TCONS_00029730	XLOC_011886	-	chr17:41415875-41438713	KO	Rescue	OK	2.16192	1.16435	-0.892791	-1.88283	0.002	0.038734	yes	1.88283
TCONS_00020470	XLOC_008204	-	chr14:30873888-30878537	KO	Rescue	OK	0.186526	0.297615	0.674072	1.88277	0.00145	0.0301433	yes	1.88277
TCONS_00014505	XLOC_005757	LOC642846	chr12:9436252-9466684	KO	Rescue	OK	1.89242	2.46556	0.38168	1.88268	0.00155	0.0316751	yes	1.88268
TCONS_00000512	XLOC_000205	CDA	chr1:20915409-20945402	KO	Rescue	OK	38.2892	30.0923	-0.347541	-1.88226	0.0009	0.0207972	yes	1.88226
TCONS_00040112	XLOC_016087	NR4A2	chr2:157180943-157190979	KO	Rescue	OK	3.57891	4.69761	0.392407	1.88173	0.0013	0.0276517	yes	1.88173
TCONS_00064705	XLOC_026362	-	chr8:81451261-81455322	KO	Rescue	OK	0.589969	0.400269	-0.55967	-1.88072	0.00145	0.0301433	yes	1.88072
TCONS_00064586	XLOC_026299	SDCBP	chr8:59465727-59495875	KO	Rescue	OK	140.464	109.076	-0.364868	-1.88067	0.00085	0.0199166	yes	1.88067
TCONS_00014667	XLOC_005830	PDE3A	chr12:20521195-20837041	KO	Rescue	OK	2.37631	4.29673	0.854516	1.87911	0.0013	0.0276517	yes	1.87911
TCONS_00040097	XLOC_016083	STAM2	chr2:152973314-153032506	KO	Rescue	OK	4.35926	3.49182	-0.320104	-1.87891	0.00105	0.0235431	yes	1.87891
TCONS_00021612	XLOC_008708	STARD9	chr15:42867841-43013196	KO	Rescue	OK	0.299623	0.160286	-0.902503	-1.8781	0.0012	0.025911	yes	1.8781
TCONS_00062293	XLOC_025316	SSBP1	chr7:141438120-141487541	KO	Rescue	OK	81.75	109.88	0.426636	1.87808	0.0011	0.0244225	yes	1.87808
TCONS_00064924	XLOC_026473	WDYHV1	chr8:124428897-124454691	KO	Rescue	OK	7.5711	5.52158	-0.455421	-1.87797	0.00145	0.0301433	yes	1.87797
TCONS_00010973	XLOC_004363	TMEM132A	chr11:60691905-60719257	KO	Rescue	OK	5.53561	8.71667	0.655034	1.87698	0.00085	0.0199166	yes	1.87698
TCONS_00071723	XLOC_029267	TSC22D3	chrX:106956449-107020274	KO	Rescue	OK	7.35833	4.56631	-0.68835	-1.87689	0.002	0.038734	yes	1.87689
TCONS_00035176	XLOC_014057	ZNF708	chr19:21470444-21512212	KO	Rescue	OK	0.600417	0.931088	0.632953	1.87598	0.0013	0.0276517	yes	1.87598
TCONS_00069643	XLOC_028436	SAT1	chrX:23801274-23804327	KO	Rescue	OK	2.94023	1.60613	-0.872337	-1.87571	0.00155	0.0316751	yes	1.87571
TCONS_00013753	XLOC_005486	MMP7	chr11:102391238-102401478	KO	Rescue	OK	0.661603	0.338948	-0.964902	-1.87566	0.00235	0.0436472	yes	1.87566
TCONS_00054943	XLOC_022063	NOP16	chr5:175810939-175815763	KO	Rescue	OK	50.2795	63.7607	0.342696	1.87563	0.0013	0.0276517	yes	1.87563
TCONS_00052100	XLOC_020881	TRIP13	chr5:892968-918164	KO	Rescue	OK	125.562	153.673	0.291464	1.87536	0.001	0.0226328	yes	1.87536
TCONS_00043628	XLOC_017523	ERG	chr21:39739182-40033704	KO	Rescue	OK	1.29833	1.90954	0.556567	1.87483	0.00125	0.0267805	yes	1.87483
TCONS_00026508	XLOC_010644	PIEZO1	chr16:88772890-88851626	KO	Rescue	OK	57.1507	73.9407	0.371596	1.8747	0.00135	0.0284327	yes	1.8747
TCONS_00028793	XLOC_011514	DHX33	chr17:5344231-5372380	KO	Rescue	OK	21.0774	26.4901	0.329754	1.87461	0.0011	0.0244225	yes	1.87461
TCONS_00056848	XLOC_022849	LINC00602	chr6:166319586-166403103	KO	Rescue	OK	8.49996	15.1513	0.833918	1.87371	0.00095	0.0216666	yes	1.87371
TCONS_00011168	XLOC_004436	PPP2R5B	chr11:64691523-64703360	KO	Rescue	OK	0.814134	0.450322	-0.854308	-1.87357	0.0023	0.0429672	yes	1.87357
TCONS_00057671	XLOC_023162	GLO1	chr6:38643701-38670952	KO	Rescue	OK	147.222	120.456	-0.289487	-1.87323	0.0014	0.0292935	yes	1.87323
TCONS_00045030	XLOC_018090	LIF	chr22:30636435-30654011	KO	Rescue	OK	0.882982	0.576346	-0.615449	-1.87237	0.002	0.038734	yes	1.87237
TCONS_00042387	XLOC_017016	SAMHD1	chr20:35504569-35580331	KO	Rescue	OK	3.1288	2.25359	-0.473383	-1.87188	0.00205	0.0394643	yes	1.87188
TCONS_00002683	XLOC_001104	BLZF1	chr1:169337193-169396670	KO	Rescue	OK	9.09389	7.19275	-0.338353	-1.87139	0.00145	0.0301433	yes	1.87139
TCONS_00011552	XLOC_004571	PPME1	chr11:73711325-73965748	KO	Rescue	OK	26.1733	33.606	0.360621	1.87114	0.0012	0.025911	yes	1.87114
TCONS_00010007	XLOC_003942	OAT	chr10:126085871-126107545	KO	Rescue	OK	24.9445	20.2068	-0.303881	-1.869	0.0011	0.0244225	yes	1.869
TCONS_00001401	XLOC_000542	GADD45A	chr1:68150859-68154021	KO	Rescue	OK	19.4179	15.2253	-0.350918	-1.86881	0.00135	0.0284327	yes	1.86881
TCONS_00032097	XLOC_012823	CCDC94	chr19:4247110-4269085	KO	Rescue	OK	18.6016	23.1069	0.312899	1.86867	0.0011	0.0244225	yes	1.86867
TCONS_00035091	XLOC_014029	CRLF1	chr19:18704034-18717774	KO	Rescue	OK	8.06041	4.71019	-0.775067	-1.86785	0.00095	0.0216666	yes	1.86785
TCONS_00018500	XLOC_007358	PARP4	chr13:24995068-25086948	KO	Rescue	OK	24.1263	19.7323	-0.29005	-1.86776	0.0008	0.0189292	yes	1.86776
TCONS_00040742	XLOC_016345	IRS1	chr2:227596032-227663506	KO	Rescue	OK	0.612801	0.805496	0.394459	1.86629	0.0012	0.025911	yes	1.86629
TCONS_00013545	XLOC_005412	CLNS1A	chr11:77300679-77348918	KO	Rescue	OK	105.699	129.374	0.291585	1.86623	0.001	0.0226328	yes	1.86623
TCONS_00000053	XLOC_000015	ISG15	chr1:943442-949922	KO	Rescue	OK	21.6436	16.726	-0.371853	-1.86505	0.001	0.0226328	yes	1.86505
TCONS_00011736	XLOC_004662	CEP57	chr11:95523624-95657756	KO	Rescue	OK	16.4669	24.8686	0.594758	1.8644	0.00125	0.0267805	yes	1.8644
TCONS_00005712	XLOC_002298	SELENBP1	chr1:151336740-151345213	KO	Rescue	OK	26.5403	20.8573	-0.347627	-1.86405	0.0013	0.0276517	yes	1.86405
TCONS_00068162	XLOC_027816	NDUFB6	chr9:32553523-32573182	KO	Rescue	OK	56.8385	45.6615	-0.315889	-1.86391	0.00195	0.0380719	yes	1.86391
TCONS_00025207	XLOC_010087	CDK10	chr16:89738390-89769152	KO	Rescue	OK	3.02038	5.08905	0.752667	1.86379	0.00205	0.0394643	yes	1.86379
TCONS_00052951	XLOC_021226	SLC22A5	chr5:131630144-131731307	KO	Rescue	OK	8.61892	6.57493	-0.390533	-1.86371	0.00125	0.0267805	yes	1.86371
TCONS_00032348	XLOC_012916	SLC44A2	chr19:10713120-10755235	KO	Rescue	OK	18.6607	24.4686	0.39093	1.86362	0.0016	0.03249	yes	1.86362
TCONS_00064584	XLOC_026299	SDCBP	chr8:59465727-59495875	KO	Rescue	OK	45.4287	27.048	-0.74808	-1.86351	0.0016	0.03249	yes	1.86351
TCONS_00004279	XLOC_001720	SLC9A1	chr1:27425299-27481621	KO	Rescue	OK	5.55497	4.44649	-0.321111	-1.86328	0.0013	0.0276517	yes	1.86328
TCONS_00002729	XLOC_001124	SUCO	chr1:172502097-172581175	KO	Rescue	OK	6.63539	5.16392	-0.361716	-1.86299	0.0011	0.0244225	yes	1.86299
TCONS_00057835	XLOC_023237	TNFRSF21	chr6:47199267-47277680	KO	Rescue	OK	0.80352	1.5074	0.907657	1.86183	0.0015	0.0308992	yes	1.86183
TCONS_00051349	XLOC_020592	HPSE	chr4:84213613-84256306	KO	Rescue	OK	3.04181	2.37701	-0.355779	-1.86176	0.0011	0.0244225	yes	1.86176
TCONS_00039097	XLOC_015658	STRN	chr2:37062901-37193797	KO	Rescue	OK	4.32729	5.42403	0.325902	1.86082	0.0012	0.025911	yes	1.86082
TCONS_00009451	XLOC_003732	POLR3A	chr10:79734906-79789298	KO	Rescue	OK	8.18609	10.042	0.294804	1.86046	0.0012	0.025911	yes	1.86046
TCONS_00005737	XLOC_002304	RORC	chr1:151778546-151804348	KO	Rescue	OK	0.890582	0.390362	-1.18994	-1.86027	0.0019	0.0372657	yes	1.86027
TCONS_00035258	XLOC_014096	PEPD	chr19:33877854-34012799	KO	Rescue	OK	24.8968	20.1905	-0.302286	-1.85972	0.0011	0.0244225	yes	1.85972
TCONS_00023857	XLOC_009604	TNFRSF12A	chr16:3070306-3072383	KO	Rescue	OK	58.7253	72.179	0.297597	1.85938	0.00085	0.0199166	yes	1.85938
TCONS_00071253	XLOC_029084	-	chrX:48736635-48738240	KO	Rescue	OK	0.393443	0.19581	-1.0067	-1.85893	0.0023	0.0429672	yes	1.85893
TCONS_00002009	XLOC_000824	NBPF9	chr1:144614958-144828810	KO	Rescue	OK	10.1197	12.505	0.305342	1.85819	0.0012	0.025911	yes	1.85819
TCONS_00050682	XLOC_020298	SAP30	chr4:174292092-174298683	KO	Rescue	OK	31.7754	39.2262	0.303906	1.85806	0.0012	0.025911	yes	1.85806
TCONS_00050393	XLOC_020196	BBS12	chr4:123653856-123666098	KO	Rescue	OK	0.905856	0.623611	-0.538636	-1.85694	0.0012	0.025911	yes	1.85694
TCONS_00056816	XLOC_022834	WTAP	chr6:160148029-160177352	KO	Rescue	OK	9.2261	16.751	0.860458	1.8568	0.00255	0.0464657	yes	1.8568
TCONS_00067995	XLOC_027729	KIAA0020	chr9:2777329-2844286	KO	Rescue	OK	32.0165	40.1526	0.326676	1.85584	0.00135	0.0284327	yes	1.85584
TCONS_00006684	XLOC_002696	LPGAT1	chr1:211916798-212004274	KO	Rescue	OK	11.41	14.9419	0.389068	1.85421	0.0012	0.025911	yes	1.85421
TCONS_00040798	XLOC_016374	ECEL1	chr2:233344536-233353792	KO	Rescue	OK	97.037	119.418	0.299414	1.85417	0.0015	0.0308992	yes	1.85417
TCONS_00014642	XLOC_005812	AEBP2	chr12:19592393-19675173	KO	Rescue	OK	9.61224	13.1025	0.4469	1.85245	0.0017	0.0341249	yes	1.85245
TCONS_00016547	XLOC_006565	KIF21A	chr12:39687029-39837216	KO	Rescue	OK	6.62437	9.04023	0.448576	1.85229	0.0012	0.025911	yes	1.85229
TCONS_00004232	XLOC_001706	PAQR7	chr1:26187974-26202438	KO	Rescue	OK	2.07247	1.11584	-0.893219	-1.85077	0.00135	0.0284327	yes	1.85077
TCONS_00017246	XLOC_006837	-	chr12:88071879-88200338	KO	Rescue	OK	4.29828	1.59081	-1.434	-1.85051	0.00195	0.0380719	yes	1.85051
TCONS_00058093	XLOC_023350	MAP3K7	chr6:91223149-91297020	KO	Rescue	OK	5.52658	7.32118	0.405689	1.85003	0.00135	0.0284327	yes	1.85003
TCONS_00044060	XLOC_017699	BCR	chr22:23522551-23660224	KO	Rescue	OK	9.5384	7.77446	-0.295004	-1.84962	0.00165	0.0332947	yes	1.84962
TCONS_00030918	XLOC_012362	RNMT	chr18:13726629-13764554	KO	Rescue	OK	7.06293	9.06364	0.359823	1.8488	0.0021	0.0402058	yes	1.8488
TCONS_00002823	XLOC_001158	MR1	chr1:181002560-181031074	KO	Rescue	OK	0.579958	0.312741	-0.890979	-1.84878	0.002	0.038734	yes	1.84878
TCONS_00051429	XLOC_020614	SNCA	chr4:90645249-90763142	KO	Rescue	OK	2.21677	2.9616	0.417915	1.84865	0.00115	0.0252705	yes	1.84865
TCONS_00064435	XLOC_026228	PROSC	chr8:37620100-37637286	KO	Rescue	OK	6.67974	8.47004	0.342576	1.84861	0.001	0.0226328	yes	1.84861
TCONS_00014971	XLOC_005950	METTL7A	chr12:51317774-51326300	KO	Rescue	OK	14.9997	9.78675	-0.616035	-1.84805	0.00235	0.0436472	yes	1.84805
TCONS_00064663	XLOC_026334	TERF1	chr8:73921096-73959987	KO	Rescue	OK	11.8036	15.4394	0.38739	1.84649	0.00175	0.0350009	yes	1.84649
TCONS_00016761	XLOC_006646	TFCP2	chr12:51487538-51566926	KO	Rescue	OK	2.38219	4.286	0.847339	1.84608	0.0028	0.0494992	yes	1.84608
TCONS_00015736	XLOC_006256	TRAFD1	chr12:112563348-112591408	KO	Rescue	OK	30.2939	24.1277	-0.328342	-1.84403	0.00125	0.0267805	yes	1.84403
TCONS_00042981	XLOC_017256	EVA1C	chr21:33784016-33887949	KO	Rescue	OK	14.336	11.2253	-0.352892	-1.84359	0.00095	0.0216666	yes	1.84359
TCONS_00053446	XLOC_021413	NEURL1B	chr5:172068159-172118535	KO	Rescue	OK	1.91803	1.33922	-0.518236	-1.84334	0.0015	0.0308992	yes	1.84334
TCONS_00041112	XLOC_016505	SLX4IP	chr20:10415811-10606647	KO	Rescue	OK	1.277	0.713268	-0.840241	-1.84221	0.00235	0.0436472	yes	1.84221
TCONS_00053567	XLOC_021465	MAML1	chr5:179159850-179204287	KO	Rescue	OK	8.48927	10.4045	0.293496	1.84194	0.00105	0.0235431	yes	1.84194
TCONS_00025880	XLOC_010378	-	chr16:30890163-30891853	KO	Rescue	OK	0.595917	0.92961	0.641515	1.84171	0.0026	0.0469108	yes	1.84171
TCONS_00031724	XLOC_012672	MYO5B	chr18:47349155-47721596	KO	Rescue	OK	3.16128	4.2628	0.431291	1.84082	0.00155	0.0316751	yes	1.84082
TCONS_00028921	XLOC_011552	LOC284023	chr17:7816637-7819621	KO	Rescue	OK	1.54973	2.18407	0.495003	1.84036	0.0013	0.0276517	yes	1.84036
TCONS_00071772	XLOC_029291	CXorf61	chrX:115592852-115594194	KO	Rescue	OK	8.6073	11.5645	0.42607	1.8402	0.00115	0.0252705	yes	1.8402
TCONS_00053370	XLOC_021373	THG1L	chr5:157158322-157168639	KO	Rescue	OK	8.1117	11.0252	0.442729	1.83965	0.0013	0.0276517	yes	1.83965
TCONS_00024053	XLOC_009679	PDXDC1	chr16:15068747-15131552	KO	Rescue	OK	38.5983	31.111	-0.311111	-1.83943	0.00135	0.0284327	yes	1.83943
TCONS_00013147	XLOC_005244	PPP1R14B	chr11:64011947-64018199	KO	Rescue	OK	197.97	241.837	0.288758	1.83811	0.00135	0.0284327	yes	1.83811
TCONS_00010487	XLOC_004163	ZDHHC13	chr11:19138691-19197967	KO	Rescue	OK	5.7002	4.20925	-0.43745	-1.83785	0.00195	0.0380719	yes	1.83785
TCONS_00062712	XLOC_025498	TOMM7	chr7:22852250-22862471	KO	Rescue	OK	109.776	89.7442	-0.290666	-1.83746	0.0012	0.025911	yes	1.83746
TCONS_00054993	XLOC_022089	PDLIM7	chr5:176910394-176924602	KO	Rescue	OK	35.4826	28.4829	-0.317016	-1.83744	0.0006	0.0150866	yes	1.83744
TCONS_00014811	XLOC_005881	ALG10B	chr12:38710556-38723528	KO	Rescue	OK	3.54852	4.45673	0.328766	1.83721	0.00135	0.0284327	yes	1.83721
TCONS_00022950	XLOC_009261	MYO1E	chr15:59428167-59665921	KO	Rescue	OK	101.703	83.2418	-0.288988	-1.83662	0.0015	0.0308992	yes	1.83662
TCONS_00027093	XLOC_010873	ALDH3A2	chr17:19551478-19580990	KO	Rescue	OK	23.3763	28.9538	0.308705	1.83651	0.00115	0.0252705	yes	1.83651
TCONS_00072452	XLOC_029605	-	chrY:13322246-13324710	KO	Rescue	OK	0.25936	0.434566	0.744621	1.83592	0.002	0.038734	yes	1.83592
TCONS_00057041	XLOC_022936	ADTRP	chr6:11713787-11779280	KO	Rescue	OK	0.525548	0.287373	-0.870895	-1.8357	0.00275	0.0488394	yes	1.8357
TCONS_00068763	XLOC_028103	PTPN3	chr9:112137973-112260593	KO	Rescue	OK	1.52058	2.15402	0.502414	1.83445	0.0018	0.035815	yes	1.83445
TCONS_00009805	XLOC_003878	SH3PXD2A	chr10:105253734-105615164	KO	Rescue	OK	20.3257	15.6486	-0.377273	-1.83331	0.0014	0.0292935	yes	1.83331
TCONS_00022993	XLOC_009277	DAPK2	chr15:64199234-64338670	KO	Rescue	OK	0.953726	0.597185	-0.675396	-1.83242	0.00165	0.0332947	yes	1.83242
TCONS_00063828	XLOC_025970	SVOPL	chr7:138276517-138386145	KO	Rescue	OK	0.522707	1.04686	1.002	1.83209	0.0017	0.0341249	yes	1.83209
TCONS_00030024	XLOC_012026	ANKRD40	chr17:48770550-48785270	KO	Rescue	OK	17.2857	21.0998	0.287654	1.83202	0.0017	0.0341249	yes	1.83202
TCONS_00025742	XLOC_010310	EARS2	chr16:23533333-23568696	KO	Rescue	OK	11.8686	14.6465	0.303401	1.83137	0.00145	0.0301433	yes	1.83137
TCONS_00066268	XLOC_027067	JRK	chr8:143738723-143751545	KO	Rescue	OK	3.94665	4.91046	0.315233	1.83123	0.00115	0.0252705	yes	1.83123
TCONS_00032426	XLOC_012944	ZNF700	chr19:12035882-12061854	KO	Rescue	OK	0.421342	0.690035	0.711676	1.83056	0.00245	0.0450915	yes	1.83056
TCONS_00062020	XLOC_025197	DNAJB9	chr7:108210188-108215294	KO	Rescue	OK	2.52575	1.91639	-0.398321	-1.83055	0.00175	0.0350009	yes	1.83055
TCONS_00027759	XLOC_011152	PNPO	chr17:46018888-46026695	KO	Rescue	OK	1.88003	4.11209	1.12912	1.8304	0.00185	0.0365643	yes	1.8304
TCONS_00049326	XLOC_019740	ATP13A3	chr3:194123399-194207732	KO	Rescue	OK	20.8129	15.1542	-0.457757	-1.82955	0.00155	0.0316751	yes	1.82955
TCONS_00056259	XLOC_022583	TPBG	chr6:83072922-83077133	KO	Rescue	OK	3.40956	2.52583	-0.43283	-1.82921	0.00185	0.0365643	yes	1.82921
TCONS_00061602	XLOC_025057	ZP3	chr7:76018645-76071388	KO	Rescue	OK	4.52277	6.10668	0.433183	1.82817	0.00245	0.0450915	yes	1.82817
TCONS_00062062	XLOC_025210	CAV1	chr7:116164838-116201239	KO	Rescue	OK	17.4335	10.7539	-0.697006	-1.82813	0.00175	0.0350009	yes	1.82813
TCONS_00019635	XLOC_007835	PCNX	chr14:71373401-71582128	KO	Rescue	OK	3.55936	1.69508	-1.07027	-1.82741	0.0014	0.0292935	yes	1.82741
TCONS_00048469	XLOC_019392	PROS1	chr3:93591880-93692934	KO	Rescue	OK	3.33231	2.17123	-0.618013	-1.82623	0.0016	0.03249	yes	1.82623
TCONS_00025373	XLOC_010139	HAGH	chr16:1859103-1922179	KO	Rescue	OK	20.714	14.6914	-0.49564	-1.82532	0.0015	0.0308992	yes	1.82532
TCONS_00032466	XLOC_012961	RAD23A	chr19:13056627-13064457	KO	Rescue	OK	44.0057	60.2635	0.453592	1.82532	0.0019	0.0372657	yes	1.82532
TCONS_00009793	XLOC_003873	PCGF6	chr10:105062552-105110891	KO	Rescue	OK	11.7005	14.4665	0.306149	1.82516	0.00115	0.0252705	yes	1.82516
TCONS_00027623	XLOC_011111	FZD2	chr17:42634811-42638630	KO	Rescue	OK	10.3812	12.7265	0.293866	1.82485	0.00135	0.0284327	yes	1.82485
TCONS_00071589	XLOC_029216	HMGN5	chrX:80369199-80554046	KO	Rescue	OK	6.34704	8.19903	0.369368	1.8243	0.0012	0.025911	yes	1.8243
TCONS_00064389	XLOC_026215	UBXN8	chr8:30601279-30624587	KO	Rescue	OK	17.6207	22.0728	0.324999	1.82357	0.0016	0.03249	yes	1.82357
TCONS_00038927	XLOC_015588	SDC1	chr2:20400557-20425194	KO	Rescue	OK	23.1638	18.1233	-0.354027	-1.82298	0.0017	0.0341249	yes	1.82298
TCONS_00034928	XLOC_013957	LOC284454	chr19:13945329-13947173	KO	Rescue	OK	8.31289	6.58289	-0.336629	-1.82297	0.00165	0.0332947	yes	1.82297
TCONS_00069761	XLOC_028499	PHF16	chrX:46771735-46920641	KO	Rescue	OK	4.66018	6.57505	0.496615	1.82282	0.00225	0.0422791	yes	1.82282
TCONS_00001428	XLOC_000550	CTH	chr1:70876713-70911205	KO	Rescue	OK	7.50929	9.9061	0.399641	1.82268	0.00155	0.0316751	yes	1.82268
TCONS_00066184	XLOC_027035	FAM49B	chr8:130851838-131028987	KO	Rescue	OK	14.7428	21.1244	0.518906	1.82222	0.0018	0.035815	yes	1.82222
TCONS_00052988	XLOC_021241	SEC24A	chr5:133983581-134063601	KO	Rescue	OK	10.1577	8.23433	-0.302852	-1.82219	0.00135	0.0284327	yes	1.82219
TCONS_00002088	XLOC_000853	NBPF16	chr1:148739441-148758311	KO	Rescue	OK	2.63136	3.33625	0.342418	1.82173	0.00145	0.0301433	yes	1.82173
TCONS_00001683	XLOC_000667	-	chr1:101546573-101549016	KO	Rescue	OK	0.845256	0.570658	-0.56676	-1.82157	0.00165	0.0332947	yes	1.82157
TCONS_00044918	XLOC_018045	GUSBP11	chr22:23980674-24059610	KO	Rescue	OK	0.390233	0.717436	0.878514	1.82085	0.00185	0.0365643	yes	1.82085
TCONS_00072206	XLOC_029472	HCFC1	chrX:153212839-153248646	KO	Rescue	OK	30.0131	38.1251	0.345148	1.82059	0.0012	0.025911	yes	1.82059
TCONS_00032755	XLOC_013073	ZNF714	chr19:21264952-21309545	KO	Rescue	OK	1.58516	2.43075	0.61678	1.82036	0.0019	0.0372657	yes	1.82036
TCONS_00001688	XLOC_000670	RNPC3	chr1:104068308-104122149	KO	Rescue	OK	1.32272	0.799857	-0.725689	-1.82002	0.0012	0.025911	yes	1.82002
TCONS_00053372	XLOC_021374	LSM11	chr5:157170754-157183746	KO	Rescue	OK	1.95155	2.56397	0.393757	1.81925	0.00115	0.0252705	yes	1.81925
TCONS_00003481	XLOC_001413	KIAA1804	chr1:233463451-233521052	KO	Rescue	OK	4.42016	5.61938	0.346313	1.81874	0.0016	0.03249	yes	1.81874
TCONS_00062983	XLOC_025602	PURB	chr7:44915891-44924960	KO	Rescue	OK	6.54726	7.98975	0.28726	1.81853	0.0015	0.0308992	yes	1.81853
TCONS_00052342	XLOC_020990	MRPS30	chr5:44809026-44815618	KO	Rescue	OK	58.7369	71.4802	0.283277	1.81767	0.00105	0.0235431	yes	1.81767
TCONS_00004666	XLOC_001863	SLC6A9	chr1:44457279-44497256	KO	Rescue	OK	1.75716	3.22521	0.876146	1.8171	0.00275	0.0488394	yes	1.8171
[truncated: 180 more rows]
